# Supplementary material for: In Situ Structure of Intestinal Apical Surface Reveals Nanovilli on Microvilli
Source: Research Square preprint supplement (doi:10.21203/rs.3.rs-398232/v1), 2021-04-19
Supplement: Supplementary file 2 [file 6272c4172ac20ab6a3b93da5.docx]

**Table s2. *C. elegans* strains in this study**

| Strain name | Genotype | Method | Resource |
| --- | --- | --- | --- |
| N2 | *Wild-type* | N.A. | CGC |
| RB815 | *cdh-8*[*(ok628*](https://wormbase.org/search/variation/(ok628)*) IV.* | N.A. | CGC |
| GOU4188 | *cdh-8(cas1109) IV.* | Microinjection | This study |
| NL1000 | *cdh-3*[*(pk87*](https://wormbase.org/search/variation/(ok628)*) III.* | N.A. | CGC |
| RB2160 | *cdh-10(ok2920) IV.* | N.A. | CGC |
| GOU4561 | *erm-1(cas1118[erm-1::wrmScarlet knock-in]) I.* | Microinjection | This study |
| GOU4341 | *erm-1(cas625[erm-1::gfp knock-in]) I.* | Microinjection | This study |
| GOU4563 | *casEx6003[Pcdh-8::cdh-8::gfp,rol-6(+)];* | Microinjection | This study |
| GOU4564 | *casEx6003*  *[Pcdh-8::cdh-8::gfp,rol-6(+)]; erm-1(cas1118) I.* | Genetic cross | This study |
| GOU4566 | *casEx6002[Pcdh-8::gfp::his-24,rol-6(+)]; [Pges-1::rfp::his-24,rol-6(+)];* | Microinjection | This study |
| GOU4309 | *casEx6004[Pges-1::cdh-8::wrmScarlet,odr-1(+)]; cdh-8*[*(ok628*](https://wormbase.org/search/variation/(ok628)*) IV.* | Microinjection and Genetic cross | This study |
| GOU4310 | *casEx6004[Pges-1::cdh-8::wrmScarlet,odr-1(+)]; cdh-8(cas1109) IV.* | Microinjection  and Genetic cross | This study |

| Gene | CRISPR-Cas9 targets (**PAM**) | Application Description |
| --- | --- | --- |
| *cdh-8* | *sg1*: GGAGACCAGTCGCATTTGAT**AGG** | *cdh-8* transmembrane domain deletion |
| *sg2*: CCGACATCATCATCCTCCAC**CGG** |
| *erm-1* | *sg1:* GACTCTCCGTCAAATCCGTGG**AGG** | *erm-1* C-terminal *wrmScarlet* knock-in |
| *sg2:* GATGAGCATTTGGAAGTTGGT**GGG** |
| *erm-1* | *sg1:* GACTCTCCGTCAAATCCGTGG**AGG** | *erm-1* C-terminal *gfp* knock-in |
| *sg2:* GATGAGCATTTGGAAGTTGGT**GGG** |

**Table s3. CRISPR-Cas9 Targets in this study**

**Table s4. Plasmids and primers in this study**

| Plasmid name | Forward primer | Reverse primer | notes |
| --- | --- | --- | --- |
| pDD162-P*eft-3::Cas9+PU6::cdh-8 sg1* | GGAGACCAGTCGCATTTGATGTTTTAGAGCTAGAAATAGCA | ATCAAATGCGACTGGTCTCCCAAGACATCTCGCAATAGGAG | PCR from pDD162-P*eft-*  *3::Cas9+PU6::Empty sgRNA* |
| pDD162-P*eft-3::Cas9+PU6::cdh-8 sg2* | CCGACATCATCATCCTCCACGTTTTAGAGCTAGAAATAGCA | GTGGAGGATGATGATGTCGGCAAGACATCTCGCAATAGGAG | PCR from pDD162-P*eft-*  *3::Cas9+PU6::Empty sgRNA* |
| pDD162-P*eft-3::Cas9+PU6::erm-1 sg1* | GACTCTCCGTCAAATCCGTGGGTTTTAGAGCTAGAAATAGCA | CCACGGATTTGACGGAGAGTCCAAGACATCTCGCAATAGGAG | PCR from pDD162-P*eft-*  *3::Cas9+PU6::Empty sgRNA* |
| pDD162-P*eft-3::Cas9+PU6::erm-1 sg2* | GATGAGCATTTGGAAGTTGGTGTTTTAGAGCTAGAAATAGCA | ACCAACTTCCAAATGCTCATCCAAGACATCTCGCAATAGGAG | PCR from pDD162-P*eft-*  *3::Cas9+PU6::Empty sgRNA* |
| pPD95.77*-cdh-8*  genomic template for transmembrane domain deletion | GAGGGTACCGGTAGAAAAATCCGTTAGTTATTACACCGAA | GCCTCCGAAGTGTGAATCAATAAATTATGAAAGTTCATATGATAAGTCAA | *cdh-8* genomic fragment was amplified from N2 and cloned into pPD95.77 |
| Transmembrane and intracellular domain deletion of *cdh-8* | TAATTTATTGATTCACACTTCGGAGGC | TGTAGGGATGTTGAAGAGTAATTGGACCAACACAGCCAATGCTGGAGCCGG | Transmembrane domain segment deletion via amplified from pPD95.77-*cdh-8* genomic template |
| pPD95.77*-erm-1*  genomic template for knock-in | GAGGGTACCGGTAGAAAAACACTCGCAACAACACACTCA | GATGTTGAAGAGTAATTGGACCGACGATCAGCTGGTCTTC | *erm-1* genomic fragment was amplified from N2 and cloned into pPD95.77 |
| pPD95.77-*erm-1::wrm Scarlet* template for knock-in | TCGATCAATACGAAAATATGGCTGGAAGTGGTAGCGGT | AAATACGATAGAACAAATAATCACTTGTAGAGCTCGTCCA | *wrmScarlet* fragment was amplified and cloned into pPD95.77  *-erm-1* template |
| pPD95.77*-erm-1*  *(Modify Sg1&Sg2)::wrmScarlet* template for Knock-in | CTCTGCGCCAGATACGGGGAGGAAACACAAAACGAAGAAT | TTCCTCCCCGTATCTGGCGCAGAGTCTTGTACTTGTCGCG | *erm-1::wrmScarlet* knockin modify sg |
| pPD95.77-P*cdh-8-gfp::his-24* | CCCTTGAGGGTACCGGTAGAAAAACGCATGTGGGGCACGAATCCGAAC | GATGTTGAAGAGTAATTGGACTATAGACAATACGGCTTCATGAATATTTAGGA | P*cdh-8* genomic fragment was amplified from N2 and cloned into pPD95.77 |
| pPD95.77-P*cdh-8-gfp::his-24* | TCCTAAATATTCATGAAGCCGTATTGTCTATAATGAGTAAAGGAGAAGAACTT | GATGTTGAAGAGTAATTGGACACCGCTACCACTTCCAGC | *gfp* fragment was amplified and cloned into pPD95.77-P*cdh-8* |
| pPD95.77-P*cdh-8-gfp::his-24* | GCTGGAAGTGGTAGCGGTATGTCTGATTCCGCTGTTGTTG | GGGATGTTGAAGAGTAATTGGACAGTGATACTTCTTAGTCTGG | *his-24* fragment was amplified and cloned into pPD95.77 -P*cdh-8::gfp* |
| *Pcdh-8* | CCCTTGAGGGTACCGGTAGAAAAA | GAAAATTTGAATAGTTGAGACATTATAGACAATACGGCTTCATGAATATTTAGGA | *Pcdh-8* amplified from pPD95.77-P*cdh-8-gfp::his-24* for SOEing *Pcdh-8::cdh-8(cDNA)::gfp-unc-54 3’utr* |
| *cdh-8(cDNA)* | TCCTAAATATTCATGAAGCCGTATTGTCTATAATGTCTCAACTATTCAAATTTTC | ACCGCTACCACTTCCAAGTTCAGTTGACTGCAAATC | *Pcdh-8* cDNA amplified from synthesis plasmid for SOEing *Pcdh-8::cdh-8(cDNA)::gfp::unc-54 3’utr* |
| *gfp-unc-54 3’utr* | GGAAGTGGTAGCGGTATGAGTAAAGGAGAA | AAGGGCCCGTACGGCCGACTAGTAGG | *gfp-unc-54 3’utr* amplified from pPD95.77 for SOEing *Pcdh-8::cdh-8(cDNA)::gfp::unc-54 3’utr* |
| SOEing PCR of *Pcdh-8::cdh-8(cDNA):: gfp::unc-54 3’utr* | CGCATGTGGGGCACGAATCCGAAC | GGAAACAGTTATGTTTGGTATATTGGG | SOEing *Pcdh-8::cdh-8(cDNA)::gfp::unc-54 3’utr* |
| pPD95.77-P*ges-1::tagRFP-his-24* | CCCTTGAGGGTACCGGTAGAAAAACGTGAGGCGTGTCTGATAAG | ACCGCTACCACTTCCAGCCTGAATTCAAAGATAAGATATG | P*ges-1* amplified and cloned into pPD95.77*-his-24* |
| pPD95.77-P*ges-1::tagRFP -his-24* | CATATCTTATCTTTGAATTCAGATGGTCTCCAAGGGAGAAG | ACCGCTACCACTTCCAGCATTGAGCTTGTGTCCGAGC | *tagRFP* amplified and cloned into pPD95.77 -P*ges-1-his-24* |
| pPD95.77*-erm-1 wrmScarlet* knock-in inner primer | GCGAGCTTGACAGTGTTAAAG | GAAGTTGGTGCGAGACAATTGAGA | Identifying *erm-1::wrmScarlet* knock-in |
| pPD95.77*-erm-1 wrmScarlet* knock-in outer prime*r* | AGAGGATCGTGCTCTTAAG | TCTCGAACTCGTGTCCGTTCAT | Identifying *erm-1::wrmScarlet* knock-in |
| *cdh-8 (cas1109)*  deletion inner primer | GACTGTACAGGCAACGGATTTAGA | ATATGGCGAAGTATGAGGTCCCAC | Identifying *cdh-8 (cas1109)* deletion |
| *cdh-8 (cas1109)* deletion outer primer | CCGACGTAGGAGGTCTAAGAGCCACG | GCTTTCGTTCGTAGTTATTCCGTTGTC | Identifying *cdh-8 (cas1109)* deletion |
