# Supplementary material for: In Situ Structure of Intestinal Apical Surface Reveals Nanovilli on Microvilli
Source: Research Square preprint supplement (doi:10.21203/rs.3.rs-398232/v1), 2021-04-19
Supplement: Supplementary file 3 [file cca6a2aca23682c0944f18a2.docx]

**Materials and Methods**

**The *C. elegans* strains and culture**

Table s2 lists the *C. elegans* strains used in this study. Using the standard protocol 1, we cultivated *C. elegans* on nematode growth medium (NGM) agar plates seeded with the *Escherichia coli* OP50 at 20 °C. The wild-type strain was Bristol N2. Some strains were provided by the *Caenorhabditis* Genetics Center (CGC), funded by the NIH Office of Research Infrastructure Programs (P40 OD010440).

**Molecular biology, genome editing, and transgenesis**

We perform the genome editing of the *cdh-8* and *erm-1* genes in *C. elegans* following the established protocols 2,3. We used the CRISPR design tool (https://zlab.bio/guide-design-resources) to select the target sites. The sgRNA sequences (Table s3) were inserted into the pDD162 vector (Addgene #47549) by linearizing this vector with 15 bp overlapped primers using Phusion high-fidelity DNA polymerase (New England Biolabs, cat. no. MO531L). PCR products were digested with Dpn I (Takara, cat. no. 1235A) for 2 hours at 37°C and transformed into Trans5α bacterial chemically competent cells (TransGen Biotech, Cat no. CD201-01). The linearized PCR products with 15 bp overlapping ends were cyclized to generate plasmids by spontaneous recombination in bacteria. Homology recombination (HR) templates were constructed by cloning the 1.5 kb upstream and downstream homology arms into pPD95.77 plasmids using In-Fusion Advantage PCR cloning kit (Clontech, Cat. #639621). A fluorescence tag (e.g., GFP) was inserted into the constructs with a flexible linker before the stop codons. Synonymous mutations were introduced to Cas9 target sites to avoid the cleavage of the homologous repair template by Cas9. The plasmids were listed in Table s4. GFP-tagged CHD-8 was generated using a PCR SOEing method 4 that fused a 2844 bp promoter plus the coding region of *cdh-8* with *gfp::unc-54* 3’ UTR DNA fragments. The primers were listed in Table s4.

To generate a knock-in strain, we purified the sgRNA construct and the repair template plasmids using the PureLink Quick PCR purification Kit (Invitrogen, #K310001) and co-injected them into N2 animals with the pRF4 [*rol-6 (su1006)*] co-injection marker. F1 transgenic progenies were singled and screened by PCR and Sanger sequencing. Transgenic animals were generated by the germline microinjection of DNA plasmids or PCR products into N2 with the P*odr-1::gfp* plasmid as a co-injection marker. We maintained at least two independent transgenic lines with a constant transmission rate (>50%). Concentrations of DNA constructs used for generating knock-in or overexpression were 50 ng/µl or 20 ng/µl, respectively.

**High-pressure freezing (HPF) and TEM of *C. elegans***

We performed HPF experiments using an early protocol with minor modifications 5. *C. elegans* L1 larvae were washed off plates with M9 buffer. An approximately 2 μl droplet of worm suspension was applied directly onto the glow-discharged cryo-EM grid. The extra bulk of buffer was blotted with filter paper. The cryo-EM grids were immediately transferred into the 100-μm-deep cavity of 6-mm aluminum carriers (Beijing Wulundes Biotech Ltd), which were filled with 2-methyl pentane (Sigma, cat. no. M65807). The carriers were quickly covered with 0.12-mm-thick sapphire discs. The sandwiched assembly was transferred into the HPM100 high-pressure freezing machine (Leica Microsystems) using a 6 mm CLEM holder. The assembly was transferred into the FC6 cryo-ultramicrotome chamber (Leica Microsystems) at −150 °C. The assemblies with the intact sapphire discs were kept in the chamber for 10 minutes to sublime the extra 2-methyl pentane. The cryo-EM grids were then picked out from the assemblies and stored in liquid nitrogen.

For TEM experiments, *C. elegans* strains were transferred to a 50 μm deep specimen carrier with a pipette and frozen rapidly by a Leica EM HPM100 high-pressure freezing system. Carriers were immersed in fixative (acetone solution of 1% osmium tetroxide and 0.1% uranyl acetate) in a 2 ml microcentrifuge tube. The tubes were processed in a Leica EM AFS2 machine using a standard substitution and fixation program: -90°C for 48 hours, -60°C for 24 hours, -30°C for 18 hours, and finally to 4°C. After fixation, specimens were washed three times with pure acetone, infiltrated with SPI-PON 812 resin for two days, embedded in a flat mold, and polymerized at 60°C. 90 nm ultrathin sections were generated using a Leica EM UC7 Ultramicrotome and picked on 200 mesh copper grids. Sections were post-stained with 2% uranyl acetate and Reynold’s lead citrate to enhance contrast and imaged using the FEI Tecnai G2 Spirit (120 kV) electron microscope.

**High-pressure freezing, freeze substitution, and TEM of mouse intestinal samples**

The HPF-FS samples were prepared according to previously reported methods 6. Briefly, adult ICR mice (Beijing Vital River Laboratory Animal Technology Co., Ltd.) were anesthetized with isoflurane. A small piece of the small intestine around 2 mm in diameter was cut out and immediately transferred into 0.1 mm deep aluminum carriers for high-pressure freezing. 1-hexadecene was used to fill up the remaining space and eliminate air bubbles. A sapphire disc was used as a cover. The sandwich was mounted into the specimen holder and frozen at 2100 bar within 1 min in a Wohlwend HPF Compact01 high-pressure freezer (Engineering office M. Wohlwend). The frozen samples were maintained under liquid nitrogen before freeze-substitution.

For ultrastructural preservation, samples were transferred into cryo-tubes containing fixatives (0.1% tannic acid in acetone) under liquid nitrogen and placed in an automatic freeze substitution system (Leica AFS2, Leica Microsystems) precooled to -90 ℃ for 12 h. The samples were then rinsed with anhydrous acetone three times, two hours for each before transferred to 1% osmium tetroxide plus 0.1% uranyl acetate in acetone. Freeze substitution was carried out at -90 ℃ for 24 h, followed by -60 ℃ for 24 h and -30 ℃ for 18 h, and then gradually warmed up to 4 ℃. After three 15 min rinses in anhydrous acetone, samples were warmed up to room temperature and then rinsed with anhydrous acetone once again. Samples were separated carefully from carriers and infiltrated in SPI-Pon 812 resin. Embedding was conducted in flat molds, and polymerization was done at 45 ℃ for 24 h and 60 ℃ for 48 h. 70-110 nm sections were collected on 200 mesh hexagonal copper grids (Ted Pella, Inc.) and poststained with 3% uranyl acetate in 70% methanol/H2O on ice 7 min, followed by Sato’s lead at RT for 2 min. The sections were imaged in a 120 kV FEI Tecnai G2 Spirit TWIN transmission electron microscope (Thermo Fisher Scientific Company) equipped with a 4k x 4k 895 CCD camera (Gatan Corp.).

**Cryo-FIB milling of *C. elegans* larvae and mouse intestinal tissues**

The same cryo-FIB milling protocol was used for *C. elegans* larvae and mouse intestinal tissues. Helios NanoLab G3 UC dual-beam microscope (Thermo Fisher Scientific company) equipped with Quorum PP3010T cryo-transfer system was used for cryo-FIB milling experiments. We used the home-made cryo-FIB shuttle adapted to the PP3010T system to mount and transfer the grid samples. The shuttle keeps two frozen specimens on a slope of 30 degrees, including the naked grids and packaged autogrids. A protective shutter 7,8 covers the samples to avoid ice contamination during transport. The shutter was opened or closed by the manipulation knife within the PP3010T preparation chamber.The high-pressure freezing samples were loaded on the cryo-FIB shuttle and transferred to the cryo-stage of the PP3010T preparation chamber. To eliminate the residual cryoprotectant, we kept the samples in the chamber for 30 ~ 60 min. Sputter coating of a Platinum (Pt) layer was performed in the PP3010T preparation chamber, with a parameter of 10 mA and 60 seconds. The Pt layer improves sample conductivity and decreases the charge-induced movement during FIB milling.

SEM images were acquired at the accelerating voltage of 2 kV and beam current of 0.2 nA by Everhart-Thornley Detector (ETD)9. A gas injection system (GIS) was used to do protective Pt coating before FIB Milling. The stage was tilted to 18 degrees. Rough milling of the parallel pattern from two sides was performed using an ion beam current of 2.5 nA ~ 0.23 nA until the lamella thickness was approximately 1- 2 μm. An ion beam current of 80 pA ~ 24 pA was used for fine polishing until the lamella's thickness was about 150-200 nm. The grids were transferred into grid boxes within a liquid nitrogen tank for storage.

**Cryo-ET data collection**

We collected the cryo-ET data using the Titan Krios Microscopy (Thermo Fisher Scientific company) operated at a voltage of 300 KV and equipped with Cs corrector, GIF Quantum energy filter (Gatan), and K2 Summit direct electron detector (Gatan). All the tilt series were recorded from 60° to -60°with the SerialEM software 10. The recording state was at a nominal magnification of 33,000× in counting mode with a pixel size of 3.421 Å•pixel-1. Each stack was exposed for 2.4 second (s) with an exposure time of 0.3 s per frame and recorded as a movie of 8 frames, resulting in the total dose rate of approximately 1.927 electrons per Å2 for each stack. GIF was set to a slit width of 20 eV. The defocus ranged from -3 μm to -7 μm. MotionCor2 program was used to correct the beam-induced motion 11. For the *C. elegans cdh-8(cas1109)* mutant samples, the tilt series were collected with a Volta phase plate, and the defocus was about -1 μm.

**Cryo-ET reconstruction and sub-tomogram averaging**

Tilt series were aligned with the patch-tracking method in IMOD software 12. The tomograms were reconstructed with TOMO3D scripts 13. The binning four tomograms (pixel size, 13.684 Å) reconstructed with Simultaneous Iterative Reconstruction Technique (SIRT) were used for particle picking manually. Tomograms reconstructed with weighted-back projection (WBP) were used for further sub-tomogram averaging analysis. 4983 sub-tomograms were aligned and averaged with i3 software 14.

**Membrane segmentation atomic model fitting**

To analyze the structure of nanovilli, we docked the crystal model of the human proto-cadherin-15 EC8 repeats (PDB code 4XHZ) into the sub-tomogram averaging maps with ‘fit in map’ command in the UCSF Chimera software 15. To analyze the arrangement of nanovilli in the microvilli membrane, we re-mapped the nanovilli sub-tomogram averaging map back into the tomograms with the refined positions and orientations. The segmentation of the microvilli, endoplasmic reticulum, and mitochondria was performed using the Amira software (Thermo Fisher). Ribosome particles were manually picked and aligned with i3 software to generate the orientation angles. The cryo-ET map of the yeast 80S ribosome (EMDB code 8799) was filtered to 25 Å and re-mapped back into the tomogram. The rendering images were made with the UCSF Chimera software. The tomograms were processed to increase contrast using the Cryo-CARE software 16.

**Single-cell mRNA sequencing in *C. elegans***

To identify nanovilli components, we applied SPLiT-seq (split-pool ligation-based transcriptome sequencing), a single-cell RNA-seq method that labels the cellular origin of RNA through combinatorial barcoding 17, to profile intestinal cell transcriptomes in *C. elegans* larvae. Three rounds of combinatorial barcoding yielded 18,432 barcode combinations (three rounds of barcoding processed in 4-well, 96-well, and 48-well plates 17. After removing low-quality reads and transcriptomes, we obtained 5054 single-cell transcriptomes, including transcripts from 18790 genes. Among them, 10 transcriptomes were assigned to the intestinal cell on the intestinal cell-specific expression of *ifb-2* or *pgp-1* gene 18. Comparison of transcribed genes between the intestinal cell and the epithelial seam cells that express *ceh-16*, *nhr-74,* or *nhr-73* resulted in 2261 transcripts that were only detected in the intestine but not epithelia. We performed gene set enrichment analysis for gene ontology cellular component (GOCC) and found 95 plasma membrane protein-coding genes. Gene ontology molecular function (GOMF) analysis of these plasma membrane-related genes exhibited a significant enrichment of genes categorized as calcium ion binding, including several CDH (CaDHerin) family genes. Considering that nanovilli proteins might be conserved across species, we searched 2261 intestine-specifically transcribed genes for those coding mouse homologs that reside in intestinal epithelial cell brush border 19. Our cross-species analysis generated a list of 94 genes, also including members of the cadherin family. Below are the detailed methods.

We prepared the single *C. elegans* cells as described before 20. SDS-DTT-pronase E treatment and mechanical disruption of synchronized larvae yielded cell suspension with debris. Single cells were separated from doublets, debris, and undigested larvae by filtering and were then fixed and penetrated.

To perform single-cell mRNA sequencing, we used the SPLiT-seq method as previously described 17 with modifications. Transcriptomes of single cells were labeled with three rounds of split-pool barcoding and released from cells for amplification (SPLiT-seq). In each split-pool round, fixed cells were randomly distributed into wells, and transcripts were labeled with well-specific barcodes. Segmentation of cDNA amplicons by Tn5 transposons and PCR amplification of fragments were applied during sequencing library preparation. TruePrep DNA Library Prep Kit V2 constructed the sequencing library for Illumina (Vazyme Biotech #TD502) according to the manufacturer’s instructions. The library was sequenced on HiSeq systems (Illumina) using 150 nucleotides (nt) kits and paired-end sequencing. According to the results of FastQC, adaptors or low-quality nucleotides were trimmed by Trim Galore (v0.5.2) using default parameters. For each paired-end sequencing read, a 10-bp UMI sequence and a 24-bp cell barcode were extracted from the Read 2 file by the tool “preprocess_splitseq.pl” of zUMIs (v0.0.6). The Read 1 was split by different cell barcodes in Read 2 and mapped to the *C. elegans* genome (WS263) by zUMIs (v0.0.6) and STAR (v2.6.0c). We kept unique mapping reads. The duplicated reads from the same transcript were excluded based on the UMI information in Read 2.

The raw and processed data were provided at the Gene Expression Omnibus database (GEO, http://www.ncbi.nlm.nih.gov/geo) under accession number GSE167859.

***C. elegans* body length measurement**

To measure the *C. elegans* body length, we synchronized the worms by allowing day-one young adults to lay eggs on fresh plates for one hour at 20°C. We photographed 16, 40, 64, 88, 112 hours after these eggs hatched. Worms were mounted on 3% agarose pads and paralyzed with a drop of 10 mM sodium azide and photographed with a Zeiss Axio Observer Z1 microscope. All the length measurements were performed from the worm nose to the tail tip using the Java image processing program ImageJ.

**Live-Cell Imaging**

Live-cell imaging of the worm was performed as described previously 21. Worms were anesthetized with 1 mg/ml levamisole and mounted on 3% agarose pads at 20°C. The immobilized larvae were subsequently imaged with an Axio Observer Z1 microscope (Carl Zeiss MicroImaging, Inc.) and the 488 nm and 568 nm lines of a Sapphire CW CDRH USB Laser System attached to the spinning disk confocal scan head (Yokogawa CSU-X1 Spinning Disk Unit). We conducted live-cell imaging to follow microvilli dynamics at a high spatial resolution using Zeiss LSM 900 confocal microscope with AiryScan super-resolution module equipped with highly sensitive GaAsP (Gallium Arsenide Phosphide) detectors using a 63x Zeiss objective (1.4 NA) 20°C.

**Statistical Analysis**

The quantitative data were analyzed in GraphPad Prism version 8. Independent Student’s t-tests were performed to compare the mean values between the two groups. Statistical significance was designated as *P < 0.05, **P < 0.01, and ***P < 0.001.

1 Brenner, S. The genetics of Caenorhabditis elegans. *Genetics* **77**, 71-94 (1974).

2 Dickinson, D. J., Ward, J. D., Reiner, D. J. & Goldstein, B. Engineering the Caenorhabditis elegans genome using Cas9-triggered homologous recombination. *Nat Methods* **10**, 1028-1034, doi:10.1038/nmeth.2641 (2013).

3 Friedland, A. E. *et al.* Heritable genome editing in C. elegans via a CRISPR-Cas9 system. *Nat Methods* **10**, 741-743, doi:10.1038/nmeth.2532 (2013).

4 Hobert, O. PCR fusion-based approach to create reporter gene constructs for expression analysis in transgenic C. elegans. *Biotechniques* **32**, 728-730, doi:10.2144/02324bm01 (2002).

5 Harapin, J. *et al.* Structural analysis of multicellular organisms with cryo-electron tomography. *Nat Methods* **12**, 634-636, doi:10.1038/nmeth.3401 (2015).

6 He, W., Cowin, P. & Stokes, D. L. Untangling desmosomal knots with electron tomography. *Science* **302**, 109-113, doi:10.1126/science.1086957 (2003).

7 Rigort, A. *et al.* Micromachining tools and correlative approaches for cellular cryo-electron tomography. *J Struct Biol* **172**, 169-179, doi:10.1016/j.jsb.2010.02.011 (2010).

8 Zhang, J., Ji, G., Huang, X., Xu, W. & Sun, F. An improved cryo-FIB method for fabrication of frozen hydrated lamella. *J Struct Biol* **194**, 218-223, doi:10.1016/j.jsb.2016.02.013 (2016).

9 Schaffer, M. *et al.* Optimized cryo-focused ion beam sample preparation aimed at in situ structural studies of membrane proteins. *J Struct Biol* **197**, 73-82, doi:10.1016/j.jsb.2016.07.010 (2017).

10 Mastronarde, D. N. Automated electron microscope tomography using robust prediction of specimen movements. *J Struct Biol* **152**, 36-51, doi:10.1016/j.jsb.2005.07.007 (2005).

11 Zheng, S. Q. *et al.* MotionCor2: anisotropic correction of beam-induced motion for improved cryo-electron microscopy. *Nat Methods* **14**, 331-332, doi:10.1038/nmeth.4193 (2017).

12 Kremer, J. R., Mastronarde, D. N. & McIntosh, J. R. Computer visualization of three-dimensional image data using IMOD. *J Struct Biol* **116**, 71-76, doi:10.1006/jsbi.1996.0013 (1996).

13 Agulleiro, J. I. & Fernandez, J. J. Tomo3D 2.0--exploitation of advanced vector extensions (AVX) for 3D reconstruction. *J Struct Biol* **189**, 147-152, doi:10.1016/j.jsb.2014.11.009 (2015).

14 Winkler, H. *et al.* Tomographic subvolume alignment and subvolume classification applied to myosin V and SIV envelope spikes. *J Struct Biol* **165**, 64-77, doi:10.1016/j.jsb.2008.10.004 (2009).

15 Pettersen, E. F. *et al.* UCSF Chimera--a visualization system for exploratory research and analysis. *J Comput Chem* **25**, 1605-1612, doi:10.1002/jcc.20084 (2004).

16 Buchholz, T., Jordan, M., Pigino, G. & Jug, F. in *2019 IEEE 16th International Symposium on Biomedical Imaging (ISBI 2019).* 502-506.

17 Rosenberg, A. B. *et al.* Single-cell profiling of the developing mouse brain and spinal cord with split-pool barcoding. *Science* **360**, 176-182, doi:10.1126/science.aam8999 (2018).

18 McGhee, J. D. The C. elegans intestine. *WormBook*, 1-36, doi:10.1895/wormbook.1.133.1 (2007).

19 McConnell, R. E., Benesh, A. E., Mao, S., Tabb, D. L. & Tyska, M. J. Proteomic analysis of the enterocyte brush border. *Am J Physiol Gastrointest Liver Physiol* **300**, G914-926, doi:10.1152/ajpgi.00005.2011 (2011).

20 Zhang, S., Banerjee, D. & Kuhn, J. R. Isolation and culture of larval cells from C. elegans. *PLoS One* **6**, e19505, doi:10.1371/journal.pone.0019505 (2011).

21 Chai, Y. *et al.* Live imaging of cellular dynamics during Caenorhabditis elegans postembryonic development. *Nat Protoc* **7**, 2090-2102, doi:10.1038/nprot.2012.128 (2012).
