# Supplementary material for: In Situ Structure of Intestinal Apical Surface Reveals Nanovilli on Microvilli
Source: Research Square preprint supplement (doi:10.21203/rs.3.rs-398232/v1), 2021-04-19
Supplement: Supplementary file 4 [file 12111c3e26df8b24c75025ef.xlsx]

## Sheet: Barcodes used in SPLiT-Seq
Round of barcoding	Well Position	Sequence	Primer type
Round 1	A1	/5Phos/AGGCCAGAGCATTCGCGCTGATCTTTTTTTTTTTTTTTVN	dt(15)VN
Round 1	A2	/5Phos/AGGCCAGAGCATTCGACAAGCTATTTTTTTTTTTTTTTVN	dt(15)VN
Round 1	A3	/5Phos/AGGCCAGAGCATTCGCTGTAGCCTTTTTTTTTTTTTTTVN	dt(15)VN
Round 1	A4	/5Phos/AGGCCAGAGCATTCGAGTACAAGTTTTTTTTTTTTTTTVN	dt(15)VN
Round 1	A1	/5Phos/AGGCCAGAGCATTCGGTCGTAGANNNNNN	random hexamer
Round 1	A2	/5Phos/AGGCCAGAGCATTCGGTCTGTCANNNNNN	random hexamer
Round 1	A3	/5Phos/AGGCCAGAGCATTCGGTGTTCTANNNNNN	random hexamer
Round 1	A4	/5Phos/AGGCCAGAGCATTCGTAGGATGANNNNNN	random hexamer
Round 2	A1	/5Phos/CATCGGCGTACGACTAACGTGATATCCACGTGCTTGAG
Round 2	A2	/5Phos/CATCGGCGTACGACTAAACATCGATCCACGTGCTTGAG
Round 2	A3	/5Phos/CATCGGCGTACGACTATGCCTAAATCCACGTGCTTGAG
Round 2	A4	/5Phos/CATCGGCGTACGACTAGTGGTCAATCCACGTGCTTGAG
Round 2	A5	/5Phos/CATCGGCGTACGACTACCACTGTATCCACGTGCTTGAG
Round 2	A6	/5Phos/CATCGGCGTACGACTACATTGGCATCCACGTGCTTGAG
Round 2	A7	/5Phos/CATCGGCGTACGACTCAGATCTGATCCACGTGCTTGAG
Round 2	A8	/5Phos/CATCGGCGTACGACTCATCAAGTATCCACGTGCTTGAG
Round 2	A9	/5Phos/CATCGGCGTACGACTCGCTGATCATCCACGTGCTTGAG
Round 2	A10	/5Phos/CATCGGCGTACGACTACAAGCTAATCCACGTGCTTGAG
Round 2	A11	/5Phos/CATCGGCGTACGACTCTGTAGCCATCCACGTGCTTGAG
Round 2	A12	/5Phos/CATCGGCGTACGACTAGTACAAGATCCACGTGCTTGAG
Round 2	B1	/5Phos/CATCGGCGTACGACTAACAACCAATCCACGTGCTTGAG
Round 2	B2	/5Phos/CATCGGCGTACGACTAACCGAGAATCCACGTGCTTGAG
Round 2	B3	/5Phos/CATCGGCGTACGACTAACGCTTAATCCACGTGCTTGAG
Round 2	B4	/5Phos/CATCGGCGTACGACTAAGACGGAATCCACGTGCTTGAG
Round 2	B5	/5Phos/CATCGGCGTACGACTAAGGTACAATCCACGTGCTTGAG
Round 2	B6	/5Phos/CATCGGCGTACGACTACACAGAAATCCACGTGCTTGAG
Round 2	B7	/5Phos/CATCGGCGTACGACTACAGCAGAATCCACGTGCTTGAG
Round 2	B8	/5Phos/CATCGGCGTACGACTACCTCCAAATCCACGTGCTTGAG
Round 2	B9	/5Phos/CATCGGCGTACGACTACGCTCGAATCCACGTGCTTGAG
Round 2	B10	/5Phos/CATCGGCGTACGACTACGTATCAATCCACGTGCTTGAG
Round 2	B11	/5Phos/CATCGGCGTACGACTACTATGCAATCCACGTGCTTGAG
Round 2	B12	/5Phos/CATCGGCGTACGACTAGAGTCAAATCCACGTGCTTGAG
Round 2	C1	/5Phos/CATCGGCGTACGACTAGATCGCAATCCACGTGCTTGAG
Round 2	C2	/5Phos/CATCGGCGTACGACTAGCAGGAAATCCACGTGCTTGAG
Round 2	C3	/5Phos/CATCGGCGTACGACTAGTCACTAATCCACGTGCTTGAG
Round 2	C4	/5Phos/CATCGGCGTACGACTATCCTGTAATCCACGTGCTTGAG
Round 2	C5	/5Phos/CATCGGCGTACGACTATTGAGGAATCCACGTGCTTGAG
Round 2	C6	/5Phos/CATCGGCGTACGACTCAACCACAATCCACGTGCTTGAG
Round 2	C7	/5Phos/CATCGGCGTACGACTGACTAGTAATCCACGTGCTTGAG
Round 2	C8	/5Phos/CATCGGCGTACGACTCAATGGAAATCCACGTGCTTGAG
Round 2	C9	/5Phos/CATCGGCGTACGACTCACTTCGAATCCACGTGCTTGAG
Round 2	C10	/5Phos/CATCGGCGTACGACTCAGCGTTAATCCACGTGCTTGAG
Round 2	C11	/5Phos/CATCGGCGTACGACTCATACCAAATCCACGTGCTTGAG
Round 2	C12	/5Phos/CATCGGCGTACGACTCCAGTTCAATCCACGTGCTTGAG
Round 2	D1	/5Phos/CATCGGCGTACGACTCCGAAGTAATCCACGTGCTTGAG
Round 2	D2	/5Phos/CATCGGCGTACGACTCCGTGAGAATCCACGTGCTTGAG
Round 2	D3	/5Phos/CATCGGCGTACGACTCCTCCTGAATCCACGTGCTTGAG
Round 2	D4	/5Phos/CATCGGCGTACGACTCGAACTTAATCCACGTGCTTGAG
Round 2	D5	/5Phos/CATCGGCGTACGACTCGACTGGAATCCACGTGCTTGAG
Round 2	D6	/5Phos/CATCGGCGTACGACTCGCATACAATCCACGTGCTTGAG
Round 2	D7	/5Phos/CATCGGCGTACGACTCTCAATGAATCCACGTGCTTGAG
Round 2	D8	/5Phos/CATCGGCGTACGACTCTGAGCCAATCCACGTGCTTGAG
Round 2	D9	/5Phos/CATCGGCGTACGACTCTGGCATAATCCACGTGCTTGAG
Round 2	D10	/5Phos/CATCGGCGTACGACTGAATCTGAATCCACGTGCTTGAG
Round 2	D11	/5Phos/CATCGGCGTACGACTCAAGACTAATCCACGTGCTTGAG
Round 2	D12	/5Phos/CATCGGCGTACGACTGAGCTGAAATCCACGTGCTTGAG
Round 2	E1	/5Phos/CATCGGCGTACGACTGATAGACAATCCACGTGCTTGAG
Round 2	E2	/5Phos/CATCGGCGTACGACTGCCACATAATCCACGTGCTTGAG
Round 2	E3	/5Phos/CATCGGCGTACGACTGCGAGTAAATCCACGTGCTTGAG
Round 2	E4	/5Phos/CATCGGCGTACGACTGCTAACGAATCCACGTGCTTGAG
Round 2	E5	/5Phos/CATCGGCGTACGACTGCTCGGTAATCCACGTGCTTGAG
Round 2	E6	/5Phos/CATCGGCGTACGACTGGAGAACAATCCACGTGCTTGAG
Round 2	E7	/5Phos/CATCGGCGTACGACTGGTGCGAAATCCACGTGCTTGAG
Round 2	E8	/5Phos/CATCGGCGTACGACTGTACGCAAATCCACGTGCTTGAG
Round 2	E9	/5Phos/CATCGGCGTACGACTGTCGTAGAATCCACGTGCTTGAG
Round 2	E10	/5Phos/CATCGGCGTACGACTGTCTGTCAATCCACGTGCTTGAG
Round 2	E11	/5Phos/CATCGGCGTACGACTGTGTTCTAATCCACGTGCTTGAG
Round 2	E12	/5Phos/CATCGGCGTACGACTTAGGATGAATCCACGTGCTTGAG
Round 2	F1	/5Phos/CATCGGCGTACGACTTATCAGCAATCCACGTGCTTGAG
Round 2	F2	/5Phos/CATCGGCGTACGACTTCCGTCTAATCCACGTGCTTGAG
Round 2	F3	/5Phos/CATCGGCGTACGACTTCTTCACAATCCACGTGCTTGAG
Round 2	F4	/5Phos/CATCGGCGTACGACTTGAAGAGAATCCACGTGCTTGAG
Round 2	F5	/5Phos/CATCGGCGTACGACTTGGAACAAATCCACGTGCTTGAG
Round 2	F6	/5Phos/CATCGGCGTACGACTTGGCTTCAATCCACGTGCTTGAG
Round 2	F7	/5Phos/CATCGGCGTACGACTTGGTGGTAATCCACGTGCTTGAG
Round 2	F8	/5Phos/CATCGGCGTACGACTTTCACGCAATCCACGTGCTTGAG
Round 2	F9	/5Phos/CATCGGCGTACGACTAACTCACCATCCACGTGCTTGAG
Round 2	F10	/5Phos/CATCGGCGTACGACTAAGAGATCATCCACGTGCTTGAG
Round 2	F11	/5Phos/CATCGGCGTACGACTAAGGACACATCCACGTGCTTGAG
Round 2	F12	/5Phos/CATCGGCGTACGACTAATCCGTCATCCACGTGCTTGAG
Round 2	G1	/5Phos/CATCGGCGTACGACTAATGTTGCATCCACGTGCTTGAG
Round 2	G2	/5Phos/CATCGGCGTACGACTACACGACCATCCACGTGCTTGAG
Round 2	G3	/5Phos/CATCGGCGTACGACTACAGATTCATCCACGTGCTTGAG
Round 2	G4	/5Phos/CATCGGCGTACGACTAGATGTACATCCACGTGCTTGAG
Round 2	G5	/5Phos/CATCGGCGTACGACTAGCACCTCATCCACGTGCTTGAG
Round 2	G6	/5Phos/CATCGGCGTACGACTAGCCATGCATCCACGTGCTTGAG
Round 2	G7	/5Phos/CATCGGCGTACGACTAGGCTAACATCCACGTGCTTGAG
Round 2	G8	/5Phos/CATCGGCGTACGACTATAGCGACATCCACGTGCTTGAG
Round 2	G9	/5Phos/CATCGGCGTACGACTATCATTCCATCCACGTGCTTGAG
Round 2	G10	/5Phos/CATCGGCGTACGACTATTGGCTCATCCACGTGCTTGAG
Round 2	G11	/5Phos/CATCGGCGTACGACTCAAGGAGCATCCACGTGCTTGAG
Round 2	G12	/5Phos/CATCGGCGTACGACTCACCTTACATCCACGTGCTTGAG
Round 2	H1	/5Phos/CATCGGCGTACGACTCCATCCTCATCCACGTGCTTGAG
Round 2	H2	/5Phos/CATCGGCGTACGACTCCGACAACATCCACGTGCTTGAG
Round 2	H3	/5Phos/CATCGGCGTACGACTCCTAATCCATCCACGTGCTTGAG
Round 2	H4	/5Phos/CATCGGCGTACGACTCCTCTATCATCCACGTGCTTGAG
Round 2	H5	/5Phos/CATCGGCGTACGACTCGACACACATCCACGTGCTTGAG
Round 2	H6	/5Phos/CATCGGCGTACGACTCGGATTGCATCCACGTGCTTGAG
Round 2	H7	/5Phos/CATCGGCGTACGACTCTAAGGTCATCCACGTGCTTGAG
Round 2	H8	/5Phos/CATCGGCGTACGACTGAACAGGCATCCACGTGCTTGAG
Round 2	H9	/5Phos/CATCGGCGTACGACTGACAGTGCATCCACGTGCTTGAG
Round 2	H10	/5Phos/CATCGGCGTACGACTGAGTTAGCATCCACGTGCTTGAG
Round 2	H11	/5Phos/CATCGGCGTACGACTGATGAATCATCCACGTGCTTGAG
Round 2	H12	/5Phos/CATCGGCGTACGACTGCCAAGACATCCACGTGCTTGAG
Round 3	A1	/5Biosg/CAGACGTGTGCTCTTCCGATCTNNNNNNNNNNAACGTGATGTGGCCGATGTTTCG
Round 3	A2	/5Biosg/CAGACGTGTGCTCTTCCGATCTNNNNNNNNNNAAACATCGGTGGCCGATGTTTCG
Round 3	A3	/5Biosg/CAGACGTGTGCTCTTCCGATCTNNNNNNNNNNATGCCTAAGTGGCCGATGTTTCG
Round 3	A4	/5Biosg/CAGACGTGTGCTCTTCCGATCTNNNNNNNNNNAGTGGTCAGTGGCCGATGTTTCG
Round 3	A5	/5Biosg/CAGACGTGTGCTCTTCCGATCTNNNNNNNNNNACCACTGTGTGGCCGATGTTTCG
Round 3	A6	/5Biosg/CAGACGTGTGCTCTTCCGATCTNNNNNNNNNNACATTGGCGTGGCCGATGTTTCG
Round 3	A7	/5Biosg/CAGACGTGTGCTCTTCCGATCTNNNNNNNNNNCAGATCTGGTGGCCGATGTTTCG
Round 3	A8	/5Biosg/CAGACGTGTGCTCTTCCGATCTNNNNNNNNNNCATCAAGTGTGGCCGATGTTTCG
Round 3	A9	/5Biosg/CAGACGTGTGCTCTTCCGATCTNNNNNNNNNNCGCTGATCGTGGCCGATGTTTCG
Round 3	A10	/5Biosg/CAGACGTGTGCTCTTCCGATCTNNNNNNNNNNACAAGCTAGTGGCCGATGTTTCG
Round 3	A11	/5Biosg/CAGACGTGTGCTCTTCCGATCTNNNNNNNNNNCTGTAGCCGTGGCCGATGTTTCG
Round 3	A12	/5Biosg/CAGACGTGTGCTCTTCCGATCTNNNNNNNNNNAGTACAAGGTGGCCGATGTTTCG
Round 3	B1	/5Biosg/CAGACGTGTGCTCTTCCGATCTNNNNNNNNNNAACAACCAGTGGCCGATGTTTCG
Round 3	B2	/5Biosg/CAGACGTGTGCTCTTCCGATCTNNNNNNNNNNAACCGAGAGTGGCCGATGTTTCG
Round 3	B3	/5Biosg/CAGACGTGTGCTCTTCCGATCTNNNNNNNNNNAACGCTTAGTGGCCGATGTTTCG
Round 3	B4	/5Biosg/CAGACGTGTGCTCTTCCGATCTNNNNNNNNNNAAGACGGAGTGGCCGATGTTTCG
Round 3	B5	/5Biosg/CAGACGTGTGCTCTTCCGATCTNNNNNNNNNNAAGGTACAGTGGCCGATGTTTCG
Round 3	B6	/5Biosg/CAGACGTGTGCTCTTCCGATCTNNNNNNNNNNACACAGAAGTGGCCGATGTTTCG
Round 3	B7	/5Biosg/CAGACGTGTGCTCTTCCGATCTNNNNNNNNNNACAGCAGAGTGGCCGATGTTTCG
Round 3	B8	/5Biosg/CAGACGTGTGCTCTTCCGATCTNNNNNNNNNNACCTCCAAGTGGCCGATGTTTCG
Round 3	B9	/5Biosg/CAGACGTGTGCTCTTCCGATCTNNNNNNNNNNACGCTCGAGTGGCCGATGTTTCG
Round 3	B10	/5Biosg/CAGACGTGTGCTCTTCCGATCTNNNNNNNNNNACGTATCAGTGGCCGATGTTTCG
Round 3	B11	/5Biosg/CAGACGTGTGCTCTTCCGATCTNNNNNNNNNNACTATGCAGTGGCCGATGTTTCG
Round 3	B12	/5Biosg/CAGACGTGTGCTCTTCCGATCTNNNNNNNNNNAGAGTCAAGTGGCCGATGTTTCG
Round 3	C1	/5Biosg/CAGACGTGTGCTCTTCCGATCTNNNNNNNNNNAGATCGCAGTGGCCGATGTTTCG
Round 3	C2	/5Biosg/CAGACGTGTGCTCTTCCGATCTNNNNNNNNNNAGCAGGAAGTGGCCGATGTTTCG
Round 3	C3	/5Biosg/CAGACGTGTGCTCTTCCGATCTNNNNNNNNNNAGTCACTAGTGGCCGATGTTTCG
Round 3	C4	/5Biosg/CAGACGTGTGCTCTTCCGATCTNNNNNNNNNNATCCTGTAGTGGCCGATGTTTCG
Round 3	C5	/5Biosg/CAGACGTGTGCTCTTCCGATCTNNNNNNNNNNATTGAGGAGTGGCCGATGTTTCG
Round 3	C6	/5Biosg/CAGACGTGTGCTCTTCCGATCTNNNNNNNNNNCAACCACAGTGGCCGATGTTTCG
Round 3	C7	/5Biosg/CAGACGTGTGCTCTTCCGATCTNNNNNNNNNNGACTAGTAGTGGCCGATGTTTCG
Round 3	C8	/5Biosg/CAGACGTGTGCTCTTCCGATCTNNNNNNNNNNCAATGGAAGTGGCCGATGTTTCG
Round 3	C9	/5Biosg/CAGACGTGTGCTCTTCCGATCTNNNNNNNNNNCACTTCGAGTGGCCGATGTTTCG
Round 3	C10	/5Biosg/CAGACGTGTGCTCTTCCGATCTNNNNNNNNNNCAGCGTTAGTGGCCGATGTTTCG
Round 3	C11	/5Biosg/CAGACGTGTGCTCTTCCGATCTNNNNNNNNNNCATACCAAGTGGCCGATGTTTCG
Round 3	C12	/5Biosg/CAGACGTGTGCTCTTCCGATCTNNNNNNNNNNCCAGTTCAGTGGCCGATGTTTCG
Round 3	D1	/5Biosg/CAGACGTGTGCTCTTCCGATCTNNNNNNNNNNCCGAAGTAGTGGCCGATGTTTCG
Round 3	D2	/5Biosg/CAGACGTGTGCTCTTCCGATCTNNNNNNNNNNCCGTGAGAGTGGCCGATGTTTCG
Round 3	D3	/5Biosg/CAGACGTGTGCTCTTCCGATCTNNNNNNNNNNCCTCCTGAGTGGCCGATGTTTCG
Round 3	D4	/5Biosg/CAGACGTGTGCTCTTCCGATCTNNNNNNNNNNCGAACTTAGTGGCCGATGTTTCG
Round 3	D5	/5Biosg/CAGACGTGTGCTCTTCCGATCTNNNNNNNNNNCGACTGGAGTGGCCGATGTTTCG
Round 3	D6	/5Biosg/CAGACGTGTGCTCTTCCGATCTNNNNNNNNNNCGCATACAGTGGCCGATGTTTCG
Round 3	D7	/5Biosg/CAGACGTGTGCTCTTCCGATCTNNNNNNNNNNCTCAATGAGTGGCCGATGTTTCG
Round 3	D8	/5Biosg/CAGACGTGTGCTCTTCCGATCTNNNNNNNNNNCTGAGCCAGTGGCCGATGTTTCG
Round 3	D9	/5Biosg/CAGACGTGTGCTCTTCCGATCTNNNNNNNNNNCTGGCATAGTGGCCGATGTTTCG
Round 3	D10	/5Biosg/CAGACGTGTGCTCTTCCGATCTNNNNNNNNNNGAATCTGAGTGGCCGATGTTTCG
Round 3	D11	/5Biosg/CAGACGTGTGCTCTTCCGATCTNNNNNNNNNNCAAGACTAGTGGCCGATGTTTCG
Round 3	D12	/5Biosg/CAGACGTGTGCTCTTCCGATCTNNNNNNNNNNGAGCTGAAGTGGCCGATGTTTCG

## Sheet: Intestinal cells expr matrix
	Cell barcode	ACCTCCAAAGCCATGCGTCGTAGA_comb	ATGCCTAAACATTGGCGTCGTAGA_comb	CGAACTTAGGAGAACACGCTGATC_comb	AGTGGTCATGGTGGTAGTGTTCTA	CAGCGTTAACAAGCTAGTCGTAGA_comb	CTGTAGCCAACTCACCCTGTAGCC_comb	CACTTCGACTCAATGAGTGTTCTA_comb	CTGGCATACTGGCATAGTGTTCTA_comb	GACTAGTACACCTTACCGCTGATC_comb	CAGCGTTAAATCCGTCGTCGTAGA_comb
Wormbase ID	Gene name	presumptive intestinal cell	presumptive intestinal cell	presumptive intestinal cell	presumptive intestinal cell	presumptive intestinal cell	presumptive intestinal cell	presumptive intestinal cell	presumptive intestinal cell	presumptive intestinal cell	presumptive intestinal cell
Transcript.F07A11.16	Transcript:F07A11.16	0	0	0	0	0	0	0	0	0	0
Transcript.F46A9.7	Transcript:F46A9.7	0	0	0	0	0	0	0	0	0	0
Transcript.W02B9.4	Transcript:W02B9.4	0	0	0	0	0	0	0	0	0	0
Transcript.W09G3.11	Transcript:W09G3.11	0	0	0	0	0	0	0	0	0	0
Transcript.Y48C3A.21	Transcript:Y48C3A.21	0	0	0	0	0	0	0	0	0	0
Transcript.Y50D4A.11	Transcript:Y50D4A.11	0	0	0	0	0	0	0	0	0	0
WBGene00000001	aap-1	0	0	0	0	0	0	0	0	0	0
WBGene00000002	aat-1	0	0	0	0	0	0	0	0	0	0
WBGene00000003	aat-2	0	0	0	0	0	0	0	0	1	6
WBGene00000004	aat-3	0	0	0	0	0	0	0	0	0	0
WBGene00000006	aat-5	0	0	0	0	0	0	0	0	0	0
WBGene00000007	aat-6	0	0	0	0	0	0	0	0	0	0
WBGene00000009	aat-8	0	0	0	0	0	0	0	0	0	0
WBGene00000010	aat-9	0	0	0	0	0	0	0	0	0	0
WBGene00000012	abf-1	0	0	0	0	0	0	0	0	0	0
WBGene00000013	abf-2	0	0	0	0	0	0	0	0	0	0
WBGene00000016	abf-5	0	0	0	0	0	0	1	0	0	0
WBGene00000017	abf-6	0	0	0	0	0	0	2	0	0	0
WBGene00000018	abl-1	0	0	0	0	0	0	0	0	0	0
WBGene00000019	abt-1	0	0	0	0	0	0	0	0	0	0
WBGene00000020	abt-2	0	1	0	0	3	0	0	0	0	0
WBGene00000021	abt-3	0	0	0	0	0	0	0	0	0	0
WBGene00000022	abt-4	1	4	0	0	2	0	4	4	0	9
WBGene00000023	abt-5	0	0	0	0	0	0	0	0	0	0
WBGene00000024	abu-1	0	0	0	0	0	0	0	0	0	0
WBGene00000025	abu-2	0	0	0	0	0	0	0	0	0	0
WBGene00000027	abu-4	0	0	0	0	0	0	0	0	0	0
WBGene00000029	abu-6	0	0	0	0	0	0	0	0	0	0
WBGene00000031	abu-8	0	0	0	0	0	0	0	0	0	0
WBGene00000032	abu-9	0	0	0	0	0	0	0	0	0	0
WBGene00000033	abu-10	0	0	0	0	0	0	0	0	0	0
WBGene00000034	abu-11	0	0	0	0	0	0	0	0	0	0
WBGene00000035	ace-1	0	0	0	0	0	0	0	0	0	0
WBGene00000036	ace-2	0	0	0	0	0	0	0	0	0	5
WBGene00000037	ace-3	0	0	0	0	0	0	0	0	0	0
WBGene00000038	ace-4	0	0	0	0	0	0	0	0	0	0
WBGene00000039	acn-1	0	0	0	0	0	0	0	0	0	0
WBGene00000040	aco-1	0	4	0	0	0	0	2	1	0	4
WBGene00000041	aco-2	3	1	0	0	0	0	3	0	1	13
WBGene00000042	acr-2	0	0	0	0	0	0	0	0	0	0
WBGene00000043	acr-3	0	0	0	0	0	0	0	0	0	0
WBGene00000044	acr-5	0	0	0	0	0	0	0	0	0	0
WBGene00000046	acr-7	0	0	0	0	0	0	0	0	0	0
WBGene00000047	acr-8	0	0	0	0	0	0	0	0	0	0
WBGene00000048	acr-9	0	0	0	0	0	0	0	0	0	0
WBGene00000050	acr-11	0	0	0	0	0	0	0	0	0	0
WBGene00000051	acr-12	0	0	0	0	0	0	0	0	0	1
WBGene00000054	acr-15	0	0	0	0	0	0	0	0	0	0
WBGene00000055	acr-16	0	0	0	0	0	0	0	0	0	0
WBGene00000056	acr-17	0	0	0	0	0	0	0	0	0	0
WBGene00000057	acr-18	0	0	0	0	0	0	0	0	0	0
WBGene00000058	acr-19	0	0	0	0	0	0	0	0	0	0
WBGene00000059	acr-20	0	0	0	0	0	0	0	0	0	0
WBGene00000060	acr-21	0	0	0	0	0	0	0	0	0	0
WBGene00000061	lgc-11	0	0	0	0	0	0	0	0	0	0
WBGene00000062	acr-23	0	0	0	0	0	0	0	0	0	1
WBGene00000063	act-1	2	2	2	0	0	0	8	0	25	129
WBGene00000064	act-2	0	2	0	0	0	0	8	0	8	7
WBGene00000065	act-3	6	1	4	0	0	0	0	0	13	33
WBGene00000066	act-4	5	9	0	0	3	0	26	0	44	194
WBGene00000067	act-5	0	0	0	0	5	9	0	1	7	17
WBGene00000068	acy-1	0	0	0	0	1	0	0	0	0	3
WBGene00000069	acy-2	0	0	0	0	0	0	0	0	0	0
WBGene00000070	acy-3	0	0	0	0	0	0	0	0	2	1
WBGene00000071	acy-4	0	0	0	0	0	0	0	0	0	3
WBGene00000072	add-1	0	0	0	0	4	0	0	0	0	0
WBGene00000073	add-2	0	0	0	0	0	0	0	0	0	0
WBGene00000074	adm-2	0	0	0	0	0	2	0	0	0	3
WBGene00000075	adm-4	0	0	0	0	0	0	0	0	0	0
WBGene00000079	adr-1	0	0	0	0	0	0	0	0	0	0
WBGene00000080	adr-2	0	0	0	0	0	0	0	0	0	0
WBGene00000081	ads-1	0	0	0	0	0	0	0	5	0	0
WBGene00000082	adt-1	0	0	0	0	0	0	0	0	0	3
WBGene00000083	adt-2	0	0	0	0	0	0	0	0	0	0
WBGene00000084	aex-1	0	0	0	0	0	0	0	0	0	0
WBGene00000085	aex-2	0	0	0	0	0	0	0	0	0	0
WBGene00000086	aex-3	0	0	0	0	0	0	0	0	0	3
WBGene00000088	aex-5	0	0	0	0	0	0	0	0	2	0
WBGene00000089	aex-6	0	0	0	0	0	0	0	0	0	0
WBGene00000090	age-1	0	0	0	0	0	0	0	0	0	0
WBGene00000092	ags-3	0	0	0	0	0	0	4	0	2	0
WBGene00000093	agt-1	0	0	0	0	0	0	0	0	0	0
WBGene00000094	agt-2	0	0	0	0	0	0	0	0	0	0
WBGene00000095	aha-1	0	0	0	0	0	0	0	0	0	0
WBGene00000096	ahr-1	0	0	0	0	0	0	0	0	0	6
WBGene00000097	aip-1	6	1	0	0	0	0	0	0	2	0
WBGene00000098	air-1	0	0	0	0	0	0	0	0	0	0
WBGene00000099	air-2	0	0	0	0	0	0	0	0	0	0
WBGene00000100	ajm-1	1	12	0	0	0	1	19	3	5	25
WBGene00000101	aka-1	0	0	0	0	0	0	0	0	0	0
WBGene00000102	akt-1	0	3	0	0	1	0	1	0	0	0
WBGene00000103	akt-2	0	0	0	0	0	0	0	0	0	7
WBGene00000105	alg-1	0	10	0	0	6	4	0	0	5	0
WBGene00000106	alg-2	0	7	0	0	0	0	0	0	0	0
WBGene00000107	alh-1	0	0	0	0	0	0	0	0	0	0
WBGene00000109	alh-3	0	0	0	0	0	0	0	0	0	0
WBGene00000110	alh-4	0	0	0	0	0	0	0	0	0	0
WBGene00000111	alh-5	0	0	0	0	0	0	0	0	0	0
WBGene00000112	alh-6	0	0	0	0	0	0	1	0	0	1
WBGene00000113	alh-7	0	0	0	0	0	0	0	0	0	0
WBGene00000114	alh-8	0	0	0	0	0	0	2	3	0	0
WBGene00000115	alh-9	0	0	0	0	0	0	0	0	0	0
WBGene00000116	alh-10	0	0	0	0	0	0	0	0	0	0
WBGene00000117	alh-11	0	0	0	0	0	0	0	0	0	0
WBGene00000118	alh-12	0	0	0	0	0	0	0	0	0	5
WBGene00000120	aly-1	0	0	0	0	0	0	0	0	0	0
WBGene00000121	aly-2	0	0	0	0	0	0	0	0	0	0
WBGene00000122	aly-3	0	0	0	0	0	0	0	0	0	0
WBGene00000123	ama-1	0	0	0	0	0	0	0	0	0	7
WBGene00000135	amt-3	0	0	0	0	0	0	0	0	0	0
WBGene00000136	amt-4	0	0	0	0	0	0	0	0	0	7
WBGene00000137	amx-1	0	0	0	0	0	0	0	3	0	0
WBGene00000138	amx-2	0	0	0	0	3	0	0	0	0	0
WBGene00000139	amx-3	0	0	0	0	0	0	0	0	0	0
WBGene00000140	anc-1	5	39	0	0	15	5	10	23	50	147
WBGene00000142	aos-1	0	0	0	0	0	0	0	0	0	0
WBGene00000143	apc-2	0	0	0	0	0	0	0	0	0	10
WBGene00000144	apc-10	0	0	0	0	0	0	0	0	0	0
WBGene00000145	apc-11	0	0	0	0	0	0	1	0	0	0
WBGene00000146	ape-1	0	0	0	0	0	0	4	0	0	0
WBGene00000147	aph-1	0	0	0	0	0	0	0	0	0	0
WBGene00000148	aph-2	0	0	0	0	0	0	0	0	0	6
WBGene00000149	apl-1	0	10	0	0	0	0	0	0	1	14
WBGene00000150	apm-1	0	0	0	0	0	0	0	2	0	0
WBGene00000151	apn-1	0	0	0	0	0	0	0	0	0	0
WBGene00000155	app-1	0	0	0	0	0	4	0	0	0	0
WBGene00000156	apr-1	0	0	0	0	0	0	0	0	5	0
WBGene00000157	aps-2	0	0	0	0	0	0	0	0	0	3
WBGene00000158	apg-1	0	2	0	0	2	0	0	0	1	1
WBGene00000159	aps-1	0	0	0	0	0	0	0	0	0	0
WBGene00000160	apb-1	0	3	0	0	1	0	0	0	1	1
WBGene00000161	apa-2	0	0	0	0	0	0	1	2	1	0
WBGene00000162	apd-3	0	0	0	0	0	0	0	0	10	4
WBGene00000163	apb-3	0	0	0	0	0	0	0	3	0	0
WBGene00000164	apm-3	0	0	0	0	0	0	0	0	0	2
WBGene00000165	aps-3	0	0	0	0	0	0	0	0	3	0
WBGene00000166	apt-9	0	0	0	0	0	0	0	0	0	0
WBGene00000168	apx-1	0	0	0	0	0	0	0	0	0	0
WBGene00000169	aqp-1	0	0	0	0	0	0	0	0	0	0
WBGene00000170	aqp-2	0	0	0	0	0	0	0	0	3	11
WBGene00000171	aqp-3	0	0	0	0	0	0	0	0	0	0
WBGene00000173	aqp-5	0	0	0	0	0	0	0	0	0	1
WBGene00000174	aqp-6	0	0	0	0	0	0	0	0	0	0
WBGene00000175	aqp-7	0	0	0	0	0	0	0	0	0	0
WBGene00000176	aqp-8	0	0	0	0	0	0	0	0	0	0
WBGene00000177	aqp-9	0	0	0	0	0	0	0	0	0	0
WBGene00000178	aqp-10	0	0	0	0	0	0	0	1	0	0
WBGene00000179	aqp-11	0	0	0	0	0	0	0	0	0	0
WBGene00000180	arc-1	0	0	0	0	0	0	0	0	0	3
WBGene00000181	ard-1	0	0	0	0	2	0	0	0	0	0
WBGene00000182	arf-1.2	0	2	0	0	11	4	5	0	4	7
WBGene00000183	arf-3	0	0	0	0	5	3	0	0	0	14
WBGene00000184	arf-6	0	0	0	0	0	0	1	0	0	0
WBGene00000186	ark-1	0	0	0	0	0	0	0	0	0	0
WBGene00000187	arl-1	0	0	0	0	0	0	0	0	0	0
WBGene00000189	arl-5	0	0	0	0	0	0	0	0	0	0
WBGene00000190	arf-1.1	0	0	0	0	0	0	0	0	0	0
WBGene00000191	arl-7	0	0	0	0	0	0	0	0	0	0
WBGene00000192	arl-8	0	0	0	0	0	0	0	0	0	0
WBGene00000195	arr-1	0	0	0	0	0	0	0	0	0	0
WBGene00000196	aars-1	0	0	0	0	0	0	0	0	0	0
WBGene00000197	aars-2	0	0	0	0	0	0	0	0	1	1
WBGene00000198	art-1	0	0	0	0	0	0	0	0	4	10
WBGene00000199	arx-1	4	0	0	0	0	0	0	0	0	5
WBGene00000200	arx-2	0	1	0	0	0	0	0	0	0	0
WBGene00000201	arx-3	0	3	0	0	0	0	0	0	0	2
WBGene00000202	exos-4.2	0	0	0	0	0	0	0	0	0	0
WBGene00000203	arx-5	0	0	0	0	0	0	0	0	0	0
WBGene00000204	arx-6	0	0	0	0	0	2	0	0	0	4
WBGene00000205	arx-7	0	0	0	0	0	0	0	0	0	0
WBGene00000206	asb-1	0	0	0	0	0	0	0	0	0	4
WBGene00000207	asb-2	0	0	0	0	1	0	0	0	3	4
WBGene00000208	asc-1	0	0	0	0	0	0	0	0	0	0
WBGene00000209	asg-1	0	0	0	0	0	0	0	0	0	0
WBGene00000210	asg-2	0	7	0	0	0	0	0	0	0	8
WBGene00000211	asm-1	0	0	0	0	0	0	0	0	0	0
WBGene00000214	asp-1	2	0	0	0	0	19	0	4	13	14
WBGene00000215	asp-2	0	0	0	0	0	0	0	0	0	13
WBGene00000216	asp-3	0	0	0	0	0	0	0	6	6	2
WBGene00000217	asp-4	0	8	0	0	0	0	0	0	1	3
WBGene00000218	asp-5	0	0	0	0	2	1	0	9	18	11
WBGene00000219	asp-6	0	0	0	0	0	0	0	0	9	1
WBGene00000220	atf-2	0	0	0	0	0	0	0	0	0	0
WBGene00000221	atf-5	0	3	0	0	0	0	8	0	2	1
WBGene00000222	atf-6	0	0	0	0	0	0	0	0	0	1
WBGene00000223	atf-7	0	0	0	0	19	0	6	1	27	27
WBGene00000224	atgp-1	0	0	0	0	0	0	2	0	0	4
WBGene00000225	atgp-2	0	0	0	0	0	0	0	0	0	0
WBGene00000226	atl-1	0	0	0	0	4	0	1	0	0	1
WBGene00000227	atm-1	1	0	0	0	0	0	0	3	0	0
WBGene00000228	atn-1	0	0	0	0	0	0	0	0	1	16
WBGene00000229	atp-2	0	3	0	0	1	1	11	1	2	12
WBGene00000230	atp-3	0	0	0	0	0	0	0	0	1	3
WBGene00000231	atx-2	5	0	0	0	0	0	0	0	0	6
WBGene00000232	avr-14	0	0	0	0	0	0	0	0	0	0
WBGene00000233	avr-15	0	0	0	0	0	0	0	0	0	0
WBGene00000235	baf-1	0	0	0	0	0	0	0	0	0	0
WBGene00000236	bag-1	0	0	0	0	0	0	0	0	0	0
WBGene00000237	bam-2	0	0	0	0	0	0	0	0	0	2
WBGene00000238	bar-1	0	0	0	0	0	0	0	0	0	0
WBGene00000239	bas-1	0	0	0	0	0	0	0	0	0	0
WBGene00000240	pah-1	0	0	0	0	0	0	0	0	3	7
WBGene00000241	bbs-1	0	0	0	0	0	0	0	0	0	0
WBGene00000242	bbs-2	0	0	0	0	0	0	0	0	0	0
WBGene00000244	bbs-8	0	0	0	0	0	0	0	0	0	0
WBGene00000245	bca-1	0	0	0	0	0	0	0	4	0	0
WBGene00000247	bec-1	0	0	0	0	1	0	0	0	0	7
WBGene00000248	ben-1	0	0	0	0	0	0	0	0	1	3
WBGene00000249	bir-1	0	0	0	0	0	0	0	0	0	0
WBGene00000250	bir-2	0	0	0	0	0	0	0	0	0	0
WBGene00000251	bli-1	0	0	0	0	0	0	0	0	0	0
WBGene00000252	bli-2	0	0	0	0	0	0	0	0	0	0
WBGene00000253	bli-3	0	1	0	0	0	0	0	0	0	2
WBGene00000254	bli-4	0	3	0	0	0	0	1	0	1	0
WBGene00000255	bli-5	0	0	0	0	0	0	0	0	0	0
WBGene00000256	bli-6	0	0	0	0	0	0	0	0	0	0
WBGene00000257	bmk-1	0	0	0	0	0	0	0	0	0	0
WBGene00000259	bpl-1	0	0	0	0	0	0	0	0	0	4
WBGene00000262	bra-1	0	0	0	0	0	0	0	0	0	0
WBGene00000263	F23H11.5	0	0	0	0	0	0	0	0	0	0
WBGene00000264	brc-1	0	0	0	0	0	0	0	0	4	0
WBGene00000265	brd-1	0	0	0	0	0	0	0	0	0	0
WBGene00000266	bre-1	0	0	0	0	0	0	0	0	0	7
WBGene00000267	bre-2	0	0	0	0	0	0	0	0	0	0
WBGene00000268	bre-3	0	0	0	0	0	0	0	2	7	7
WBGene00000269	bre-4	0	0	0	0	0	0	0	0	0	2
WBGene00000270	bre-5	0	0	0	0	0	0	0	0	0	0
WBGene00000271	brf-1	0	0	0	0	0	0	0	0	0	2
WBGene00000272	bro-1	0	0	0	0	0	0	0	0	0	0
WBGene00000273	brp-1	1	0	0	0	0	0	0	2	6	16
WBGene00000274	btf-1	0	0	0	0	0	0	2	0	0	0
WBGene00000275	bub-1	2	0	0	0	0	0	0	0	0	0
WBGene00000276	byn-1	0	0	0	0	0	0	0	2	2	3
WBGene00000277	cab-1	4	0	0	0	3	0	0	0	10	39
WBGene00000279	cah-1	0	0	0	0	0	0	0	0	0	0
WBGene00000280	cah-2	0	0	0	0	0	0	0	0	0	0
WBGene00000281	cah-3	0	0	0	0	0	0	5	0	0	1
WBGene00000282	cah-4	0	3	0	0	0	0	0	0	0	1
WBGene00000283	cah-5	0	0	0	0	0	0	1	0	0	0
WBGene00000284	cah-6	0	0	0	0	0	0	0	0	0	0
WBGene00000285	cal-1	0	0	0	0	0	0	0	0	0	0
WBGene00000286	cal-2	0	0	0	0	0	0	0	0	2	0
WBGene00000287	cal-3	0	0	0	0	0	0	0	0	0	0
WBGene00000288	cal-4	0	0	0	0	0	0	0	0	4	5
WBGene00000289	cam-1	0	0	0	0	0	0	0	0	0	0
WBGene00000292	cap-1	0	2	0	0	0	0	1	0	2	5
WBGene00000293	cap-2	0	0	0	0	0	0	5	0	0	8
WBGene00000294	cas-1	1	0	0	0	0	0	9	0	0	13
WBGene00000295	cat-1	0	0	0	0	0	0	0	0	0	0
WBGene00000296	cat-2	0	0	0	0	0	0	0	0	0	0
WBGene00000298	cat-4	0	0	0	0	0	0	0	0	0	0
WBGene00000302	cav-2	0	0	0	0	0	0	0	0	0	4
WBGene00000366	cbp-1	3	2	0	0	0	0	21	0	11	20
WBGene00000367	cca-1	0	0	0	0	0	0	0	0	0	0
WBGene00000368	ccb-1	0	0	0	0	0	0	0	0	0	6
WBGene00000369	ccf-1	0	0	0	0	0	0	0	0	0	1
WBGene00000370	ccg-1	0	0	0	0	0	0	1	0	1	10
WBGene00000371	cco-1	0	0	0	0	0	0	0	0	0	1
WBGene00000373	cyp-14A5	0	0	0	0	0	0	0	0	0	0
WBGene00000374	cyp-31A1	0	0	0	0	0	0	0	0	0	0
WBGene00000375	cyp-44A1	0	0	0	0	0	0	0	0	0	0
WBGene00000376	ccr-4	0	0	0	0	0	0	0	0	4	1
WBGene00000377	cct-1	1	0	0	0	0	0	5	0	2	1
WBGene00000378	cct-2	1	0	0	0	0	3	4	0	3	3
WBGene00000379	cct-4	0	0	0	0	0	0	0	0	1	8
WBGene00000380	cct-5	0	0	0	0	2	0	2	0	6	15
WBGene00000381	cct-6	0	0	0	0	0	0	0	0	0	0
WBGene00000382	cdc-6	0	0	0	0	0	0	0	0	0	0
WBGene00000383	cdc-14	2	0	0	0	0	2	0	0	0	0
WBGene00000386	cdc-25.1	0	0	0	0	0	0	0	0	0	0
WBGene00000387	cdc-25.2	0	0	0	0	0	0	0	0	1	0
WBGene00000389	cdc-25.4	0	0	0	0	0	0	0	0	0	0
WBGene00000390	cdc-42	0	1	0	0	0	0	0	0	1	9
WBGene00000391	cdd-1	0	0	0	0	0	0	0	0	0	0
WBGene00000393	cdf-1	0	0	0	0	0	0	12	0	0	12
WBGene00000395	cdh-3	9	0	0	0	0	0	0	1	0	11
WBGene00000396	cdh-4	3	1	0	0	0	3	3	4	9	3
WBGene00000397	cdh-5	0	0	0	0	0	0	0	0	0	0
WBGene00000399	cdh-7	0	0	0	0	0	0	0	0	0	0
WBGene00000401	cdh-9	0	0	0	0	0	0	0	0	0	5
WBGene00000402	cdh-10	0	0	0	0	1	0	0	0	0	3
WBGene00000403	casy-1	0	0	0	0	0	0	0	0	9	2
WBGene00000405	cdk-1	0	0	0	0	0	0	0	0	0	0
WBGene00000406	cdk-4	0	0	0	0	0	0	0	0	0	0
WBGene00000407	cdk-5	0	0	0	0	0	0	0	0	0	0
WBGene00000408	cdk-7	0	0	0	0	0	0	0	0	0	0
WBGene00000409	cdk-8	0	0	0	0	0	0	0	0	0	1
WBGene00000410	cdk-9	0	0	0	0	0	0	0	0	1	0
WBGene00000411	cdl-1	0	0	0	0	3	0	0	0	0	0
WBGene00000412	cdr-1	0	0	0	0	0	0	0	0	0	0
WBGene00000413	cdt-1	0	0	0	0	0	0	0	0	0	0
WBGene00000414	cec-1	0	0	0	0	1	0	0	9	7	7
WBGene00000415	ced-1	0	0	0	0	0	0	0	0	1	8
WBGene00000416	ced-2	0	0	0	0	0	0	0	0	0	0
WBGene00000417	ced-3	0	0	0	0	0	0	0	0	0	0
WBGene00000418	ced-4	0	0	0	0	0	0	0	0	0	0
WBGene00000419	ced-5	0	3	0	0	0	0	0	0	0	7
WBGene00000420	ced-6	0	0	0	0	0	0	0	0	0	1
WBGene00000421	ced-7	0	7	0	0	0	0	3	0	1	3
WBGene00000422	ced-8	0	0	0	0	0	0	0	0	0	0
WBGene00000423	ced-9	0	0	0	0	0	0	0	0	0	2
WBGene00000424	ced-10	0	0	0	0	0	0	0	0	0	1
WBGene00000425	ced-11	0	0	0	0	0	0	0	0	0	0
WBGene00000426	ced-12	0	0	0	0	0	0	0	0	0	0
WBGene00000428	ceh-1	0	0	0	0	0	0	0	0	0	0
WBGene00000429	ceh-2	0	0	0	0	0	0	0	0	0	0
WBGene00000431	ceh-6	0	0	0	0	0	0	0	0	0	1
WBGene00000433	ceh-8	0	0	0	0	0	0	0	0	0	0
WBGene00000434	ceh-9	0	0	0	0	0	0	0	0	0	0
WBGene00000435	ceh-10	0	0	0	0	0	0	0	0	0	0
WBGene00000437	ceh-13	0	0	0	0	0	0	0	0	0	0
WBGene00000438	ceh-14	0	0	0	0	0	0	0	0	0	0
WBGene00000439	ceh-16	0	0	0	0	0	0	0	0	0	4
WBGene00000441	ceh-18	0	0	0	0	0	0	0	0	0	0
WBGene00000442	ceh-19	0	0	0	0	0	0	0	0	0	0
WBGene00000443	ceh-20	0	0	0	0	0	0	0	0	1	0
WBGene00000444	ceh-21	0	0	0	0	0	0	0	0	0	0
WBGene00000445	ceh-22	0	0	0	0	0	0	0	0	0	0
WBGene00000446	ceh-23	0	0	0	0	0	0	0	0	0	0
WBGene00000447	ceh-24	0	0	0	0	0	0	0	0	0	0
WBGene00000448	pros-1	0	0	0	0	0	0	0	0	6	1
WBGene00000449	ceh-27	0	0	0	0	0	0	4	0	0	0
WBGene00000451	ceh-30	0	0	0	0	0	0	0	0	0	0
WBGene00000453	ceh-32	0	0	0	0	0	0	0	0	0	0
WBGene00000454	ceh-33	0	0	0	0	0	0	0	0	0	2
WBGene00000455	ceh-34	0	0	0	0	0	0	0	0	0	0
WBGene00000458	ceh-37	0	0	0	0	0	0	0	0	0	0
WBGene00000459	ceh-38	3	0	0	0	3	0	3	0	0	19
WBGene00000460	ceh-39	0	0	0	0	0	0	0	0	0	0
WBGene00000461	ceh-40	0	0	0	0	0	0	0	0	0	0
WBGene00000462	ceh-41	0	0	0	0	0	0	0	0	0	0
WBGene00000463	ceh-43	0	0	0	0	0	0	0	0	0	3
WBGene00000464	ceh-44	0	0	0	0	0	0	2	0	4	3
WBGene00000465	cpg-1	0	0	0	0	0	0	0	0	0	0
WBGene00000466	cel-1	0	0	0	0	0	0	0	0	0	3
WBGene00000467	cep-1	0	0	0	0	0	0	0	0	0	0
WBGene00000469	ces-2	0	0	0	0	0	0	0	0	0	0
WBGene00000472	cey-1	0	3	0	0	0	0	5	0	8	32
WBGene00000473	cey-2	0	0	0	0	0	0	0	0	0	0
WBGene00000474	cey-3	0	0	0	0	0	0	0	0	0	0
WBGene00000475	cey-4	0	0	0	0	0	0	0	0	1	8
WBGene00000476	cfi-1	0	0	0	0	0	0	0	0	0	0
WBGene00000477	cft-1	0	0	0	0	0	0	0	0	0	0
WBGene00000478	cfz-2	1	0	0	0	0	0	0	0	1	0
WBGene00000479	cgh-1	0	0	0	0	0	0	0	0	0	0
WBGene00000480	cgp-1	1	0	0	0	0	0	0	0	0	2
WBGene00000481	cha-1	0	0	0	0	0	0	0	0	0	1
WBGene00000482	chd-3	2	0	0	0	0	3	0	0	0	0
WBGene00000484	che-2	0	0	0	0	0	0	0	0	0	0
WBGene00000485	che-3	0	0	0	0	0	0	0	0	0	0
WBGene00000488	che-7	0	0	0	0	0	0	0	0	0	0
WBGene00000490	che-11	0	0	0	0	0	0	0	0	0	0
WBGene00000491	che-12	0	0	0	0	0	0	0	0	0	0
WBGene00000492	che-13	0	0	0	0	0	0	0	0	0	0
WBGene00000493	che-14	0	0	2	0	0	0	0	0	0	5
WBGene00000496	chs-1	0	0	0	0	0	0	0	0	0	0
WBGene00000497	chs-2	0	0	0	0	0	0	0	0	0	0
WBGene00000498	chk-1	0	0	0	0	0	0	0	0	0	0
WBGene00000499	chk-2	0	0	0	0	0	0	0	0	0	0
WBGene00000500	chn-1	0	0	0	0	0	0	0	0	0	0
WBGene00000501	cho-1	0	0	0	0	0	0	0	0	0	0
WBGene00000502	chp-1	0	0	0	0	1	0	14	0	0	0
WBGene00000503	cht-1	0	0	0	0	0	0	0	0	0	0
WBGene00000506	cic-1	0	0	0	0	0	0	0	0	0	0
WBGene00000507	cit-1.1	0	0	0	0	0	0	0	0	0	0
WBGene00000508	cit-1.2	0	0	0	0	0	0	0	0	0	1
WBGene00000509	cka-1	0	0	0	0	0	0	2	0	0	2
WBGene00000510	cka-2	0	0	0	0	0	0	0	0	0	1
WBGene00000511	ckb-1	0	0	0	0	0	0	0	0	0	0
WBGene00000512	ckb-2	0	0	0	0	0	0	0	0	0	0
WBGene00000514	ckb-4	0	0	0	0	0	0	0	0	0	0
WBGene00000515	ckc-1	0	0	0	0	0	0	0	0	0	0
WBGene00000516	cki-1	0	0	0	0	0	0	0	0	0	0
WBGene00000517	cki-2	0	0	0	0	0	0	0	0	0	2
WBGene00000518	ckk-1	0	0	0	0	0	0	0	0	1	5
WBGene00000519	cku-70	0	0	0	0	0	0	0	0	0	0
WBGene00000520	cku-80	0	0	0	0	0	0	0	0	0	2
WBGene00000521	cky-1	0	0	0	0	0	0	0	0	0	0
WBGene00000522	clc-1	0	0	0	0	0	0	1	0	0	2
WBGene00000523	clc-2	0	0	0	0	0	0	0	0	0	0
WBGene00000524	clc-3	0	0	0	0	0	0	0	0	0	5
WBGene00000526	clc-5	0	0	0	0	0	0	0	0	0	0
WBGene00000527	cle-1	0	0	0	0	0	0	2	0	0	0
WBGene00000528	clh-1	0	0	0	0	0	0	0	0	0	0
WBGene00000529	clh-2	0	0	0	0	0	0	0	0	0	0
WBGene00000530	clh-3	0	0	0	0	0	0	0	0	0	2
WBGene00000531	clh-4	0	0	0	0	0	0	0	0	0	0
WBGene00000532	clh-5	0	1	0	0	0	0	0	0	0	1
WBGene00000533	clh-6	0	0	0	0	0	0	0	0	0	0
WBGene00000534	cpi-2	0	0	0	0	0	0	0	0	0	13
WBGene00000535	cpi-1	0	5	0	0	0	0	0	0	0	2
WBGene00000536	clk-1	0	0	0	0	0	0	0	0	0	0
WBGene00000537	clk-2	0	0	0	0	0	0	0	0	0	0
WBGene00000540	cln-3.2	0	0	0	0	0	0	0	0	0	0
WBGene00000541	cln-3.3	0	0	0	0	0	0	0	0	0	0
WBGene00000542	clp-1	0	0	0	0	0	0	6	0	0	8
WBGene00000543	clp-2	0	0	0	0	0	0	0	0	0	0
WBGene00000544	clp-3	0	0	0	0	0	0	0	0	0	0
WBGene00000545	clp-4	0	0	0	0	0	0	0	0	0	0
WBGene00000546	clp-6	0	0	0	0	0	0	0	0	0	0
WBGene00000547	clp-7	0	0	0	0	0	0	0	0	0	0
WBGene00000548	clr-1	0	0	0	0	0	0	0	0	8	10
WBGene00000549	cls-2	1	0	0	0	0	0	5	0	2	0
WBGene00000550	clu-1	0	1	0	0	0	0	2	0	0	7
WBGene00000552	cmd-1	0	8	0	0	0	0	2	1	14	30
WBGene00000553	cmk-1	0	0	0	0	0	0	0	0	3	6
WBGene00000554	cnb-1	0	0	0	0	0	0	0	1	0	0
WBGene00000556	cnc-2	0	0	0	0	0	0	0	0	0	0
WBGene00000557	cnc-3	0	0	0	0	0	0	0	0	0	0
WBGene00000558	cnc-4	0	0	0	0	2	0	0	0	0	0
WBGene00000561	cnd-1	0	0	0	0	0	0	0	0	0	0
WBGene00000562	cng-1	0	0	0	0	0	0	0	0	0	0
WBGene00000564	cnk-1	0	0	0	0	0	2	0	0	1	0
WBGene00000565	cnt-1	0	0	0	0	0	0	0	0	0	1
WBGene00000566	cnt-2	0	0	0	0	0	0	1	0	2	0
WBGene00000567	cnx-1	0	0	0	0	0	0	5	0	2	1
WBGene00000583	cof-2	0	0	0	0	0	0	0	0	0	0
WBGene00000584	cog-1	0	0	0	0	0	0	0	0	0	0
WBGene00000585	cogc-2	0	0	0	0	0	0	0	0	4	2
WBGene00000591	coh-1	0	0	0	0	0	0	0	4	0	1
WBGene00000592	coh-3	0	0	0	0	0	0	0	0	0	0
WBGene00000594	col-3	0	0	0	0	0	1	0	0	0	0
WBGene00000599	col-10	5	0	0	0	0	0	0	0	0	2
WBGene00000601	col-12	0	0	0	0	0	0	0	0	0	6
WBGene00000602	col-13	0	0	0	0	0	0	0	0	0	0
WBGene00000603	col-14	0	0	0	0	0	0	0	0	0	0
WBGene00000606	col-17	0	0	0	0	0	0	0	0	0	2
WBGene00000608	col-19	0	0	0	0	0	0	0	0	0	0
WBGene00000610	col-33	0	0	0	0	0	0	0	0	0	0
WBGene00000611	col-34	0	0	0	0	0	0	0	0	0	2
WBGene00000613	col-36	0	0	0	0	0	0	0	0	0	0
WBGene00000615	col-38	0	0	0	0	0	0	0	0	0	0
WBGene00000616	col-39	0	0	0	0	0	0	0	0	0	11
WBGene00000617	col-40	0	0	0	0	0	0	0	0	0	0
WBGene00000618	col-41	0	0	0	0	0	0	0	0	0	0
WBGene00000620	col-43	0	0	0	0	0	0	0	0	0	0
WBGene00000622	col-45	0	0	0	0	0	0	0	0	0	0
WBGene00000623	col-46	0	0	0	0	0	0	0	0	0	0
WBGene00000624	col-47	0	0	0	0	0	0	0	0	0	0
WBGene00000625	col-48	0	0	0	0	0	0	0	0	0	0
WBGene00000626	col-49	0	0	0	0	0	0	0	0	0	0
WBGene00000627	col-50	0	0	0	0	0	0	0	0	0	0
WBGene00000628	col-51	0	0	0	0	0	0	0	0	0	0
WBGene00000630	col-53	0	0	0	0	0	0	0	0	0	0
WBGene00000631	col-54	0	0	0	0	0	0	0	0	0	0
WBGene00000633	col-56	0	0	0	0	0	0	0	0	0	0
WBGene00000634	col-58	0	0	0	0	0	0	0	0	0	0
WBGene00000636	col-60	0	0	0	0	0	0	0	0	0	0
WBGene00000637	col-61	0	0	0	0	0	0	0	0	0	0
WBGene00000639	col-63	0	0	0	0	0	0	0	0	0	0
WBGene00000640	col-64	0	0	0	0	0	0	0	0	0	0
WBGene00000641	col-65	0	0	0	0	0	0	0	0	0	0
WBGene00000645	col-69	0	0	0	0	0	0	0	0	0	0
WBGene00000646	H17B01.2	0	0	0	0	0	0	0	0	0	0
WBGene00000647	col-71	0	0	0	0	0	0	0	0	0	0
WBGene00000648	col-72	0	0	0	0	0	0	0	0	0	0
WBGene00000649	col-73	0	0	0	0	0	0	0	0	0	0
WBGene00000650	col-74	0	0	0	0	0	0	0	0	0	0
WBGene00000651	col-75	0	0	0	0	0	0	0	0	0	0
WBGene00000652	col-76	0	0	0	0	0	0	0	0	0	0
WBGene00000653	col-77	0	3	0	0	0	0	0	0	0	0
WBGene00000655	col-79	0	0	0	0	0	0	0	0	0	0
WBGene00000656	col-80	0	0	0	0	0	0	0	0	0	0
WBGene00000657	col-81	0	0	0	0	0	0	0	0	0	0
WBGene00000658	col-83	0	0	0	0	0	0	0	0	0	0
WBGene00000659	col-84	0	0	0	0	0	0	0	0	0	0
WBGene00000660	col-85	0	0	0	0	0	0	0	0	0	0
WBGene00000661	col-86	0	0	0	0	0	0	0	0	0	0
WBGene00000662	col-87	0	0	0	0	0	0	0	0	0	0
WBGene00000664	col-89	0	0	0	0	0	0	0	0	0	0
WBGene00000665	col-90	0	0	0	0	0	0	0	0	0	0
WBGene00000666	col-91	0	0	0	0	0	0	0	0	0	0
WBGene00000667	col-92	0	0	0	0	0	0	0	0	0	15
WBGene00000668	col-93	0	0	0	0	0	0	0	0	0	9
WBGene00000669	col-94	0	0	0	0	0	0	0	0	0	4
WBGene00000671	col-96	0	0	0	0	0	0	0	0	0	0
WBGene00000672	col-97	0	0	0	0	0	0	0	0	0	0
WBGene00000673	col-98	0	0	0	0	0	0	0	0	0	0
WBGene00000674	col-99	0	0	0	0	0	0	0	0	0	0
WBGene00000675	col-101	0	0	0	0	0	0	0	0	4	0
WBGene00000676	col-102	0	0	0	0	0	0	0	0	0	0
WBGene00000677	col-103	0	0	0	0	0	0	0	0	13	0
WBGene00000678	col-104	0	0	0	0	0	0	0	0	0	0
WBGene00000681	col-107	0	0	0	0	0	0	0	0	0	0
WBGene00000682	col-108	0	0	0	0	0	0	0	0	0	0
WBGene00000683	col-109	0	0	0	0	0	0	0	0	0	0
WBGene00000684	col-110	0	0	0	0	0	0	0	0	0	0
WBGene00000685	col-111	0	0	0	0	0	0	0	0	0	0
WBGene00000687	col-113	0	0	0	0	0	0	0	0	0	0
WBGene00000688	col-114	0	0	0	0	0	0	0	0	0	0
WBGene00000689	col-115	0	0	0	0	0	0	0	0	0	0
WBGene00000691	col-117	3	0	0	0	0	3	0	0	9	7
WBGene00000692	col-118	0	0	0	0	0	0	0	0	0	10
WBGene00000693	col-119	0	0	0	0	0	0	0	0	0	0
WBGene00000694	col-120	0	0	0	0	0	0	0	0	0	0
WBGene00000697	col-123	0	0	0	0	0	0	0	0	0	0
WBGene00000698	col-124	0	0	0	0	0	0	0	0	0	0
WBGene00000699	col-125	0	0	0	0	0	0	0	0	0	2
WBGene00000700	col-126	0	0	0	0	0	0	0	0	0	0
WBGene00000702	col-128	0	0	0	0	0	0	0	0	0	0
WBGene00000703	col-129	0	0	0	0	0	0	0	0	0	0
WBGene00000704	col-130	0	0	0	0	0	0	0	0	0	2
WBGene00000705	col-131	0	0	0	0	0	0	0	0	0	0
WBGene00000706	col-132	0	0	0	0	0	0	0	0	0	0
WBGene00000707	col-133	0	0	0	0	0	0	0	0	0	0
WBGene00000708	col-135	0	0	0	0	0	0	0	0	0	0
WBGene00000709	col-136	0	0	0	0	0	0	0	0	0	0
WBGene00000711	col-138	0	0	0	0	0	0	0	0	0	0
WBGene00000713	col-140	0	0	0	0	0	0	0	0	0	0
WBGene00000714	col-141	0	0	0	0	0	0	0	0	0	0
WBGene00000715	col-142	0	0	0	0	0	0	0	0	0	0
WBGene00000717	col-144	0	0	0	0	0	0	0	0	7	4
WBGene00000718	col-145	0	0	0	0	0	0	0	0	0	0
WBGene00000719	col-146	0	0	0	0	0	0	0	0	0	4
WBGene00000720	col-147	0	0	0	0	0	0	0	0	0	0
WBGene00000722	col-149	0	0	0	0	0	0	0	0	0	0
WBGene00000723	col-150	0	0	0	0	0	0	0	0	0	10
WBGene00000726	col-153	0	0	0	0	0	0	0	0	0	2
WBGene00000727	col-154	0	0	0	0	0	0	0	0	0	0
WBGene00000728	col-155	0	0	0	0	0	0	0	0	0	1
WBGene00000729	col-156	0	0	0	0	0	0	0	0	0	0
WBGene00000730	col-157	0	0	0	0	0	0	0	0	0	0
WBGene00000731	col-158	0	0	0	0	0	0	0	0	0	0
WBGene00000732	col-159	0	0	0	0	0	0	0	0	0	0
WBGene00000733	col-160	3	0	0	0	0	0	0	0	0	0
WBGene00000734	col-161	0	0	0	0	0	0	0	0	0	0
WBGene00000735	col-162	0	0	0	0	0	0	0	0	0	0
WBGene00000737	col-164	0	0	0	0	0	0	0	0	0	0
WBGene00000738	col-165	0	0	0	0	0	0	0	0	0	0
WBGene00000739	col-166	0	0	0	0	0	0	0	0	1	0
WBGene00000740	col-167	0	0	0	0	0	0	0	0	2	5
WBGene00000741	col-168	0	0	0	0	0	0	0	0	0	0
WBGene00000742	col-169	0	0	0	0	0	0	0	0	0	0
WBGene00000743	col-170	0	0	0	0	0	0	0	0	0	1
WBGene00000745	col-172	0	0	0	0	0	0	0	0	0	0
WBGene00000746	col-173	0	0	0	0	0	0	0	0	0	0
WBGene00000747	col-174	0	0	0	0	0	0	0	0	0	0
WBGene00000748	col-175	0	0	0	0	0	0	0	0	0	0
WBGene00000749	col-176	1	0	0	0	0	0	0	0	3	0
WBGene00000750	col-177	0	0	0	0	0	0	0	0	0	0
WBGene00000753	col-180	0	0	0	0	0	0	0	0	0	0
WBGene00000754	col-181	0	0	0	0	0	0	0	0	0	0
WBGene00000755	col-182	0	0	0	0	0	0	0	0	0	1
WBGene00000757	col-184	0	0	0	0	0	0	0	0	0	0
WBGene00000759	col-186	0	0	0	0	0	0	0	0	0	0
WBGene00000761	coq-1	0	0	0	0	0	0	0	0	0	0
WBGene00000762	coq-2	0	0	0	0	0	0	0	0	0	0
WBGene00000763	coq-3	0	0	0	0	0	0	0	0	0	0
WBGene00000764	coq-4	0	0	0	0	0	0	0	0	0	0
WBGene00000765	coq-5	0	0	0	0	0	0	0	0	0	0
WBGene00000766	coq-6	0	0	0	0	0	0	0	0	0	3
WBGene00000767	coq-8	0	0	0	0	0	0	0	0	0	0
WBGene00000768	cor-1	0	0	0	0	0	0	0	0	0	5
WBGene00000770	cpb-1	0	0	0	0	0	0	0	0	0	0
WBGene00000771	cpb-2	0	0	0	0	0	0	0	0	0	0
WBGene00000772	cpb-3	0	0	0	0	0	0	0	0	0	0
WBGene00000773	cpf-1	5	0	0	0	0	0	0	0	0	0
WBGene00000774	cpf-2	0	0	0	0	0	0	0	0	0	0
WBGene00000775	cpin-1	0	0	0	0	0	0	0	0	0	0
WBGene00000776	cpl-1	2	0	0	0	0	7	0	0	0	2
WBGene00000777	cpn-1	0	0	0	0	0	0	0	0	0	0
WBGene00000778	cpn-2	0	0	0	0	0	0	0	0	0	0
WBGene00000779	cpn-3	0	0	0	0	0	0	0	0	9	62
WBGene00000780	cpn-4	0	0	0	0	0	0	0	0	0	0
WBGene00000781	cpr-1	0	0	0	0	0	0	0	0	0	0
WBGene00000783	cpr-3	0	2	0	0	0	0	0	0	0	0
WBGene00000784	cpr-4	0	0	0	0	0	0	0	0	4	0
WBGene00000785	cpr-5	0	0	0	0	0	0	0	0	0	0
WBGene00000786	cpr-6	0	0	0	0	0	35	0	0	3	0
WBGene00000787	cps-6	0	0	0	0	0	0	0	0	0	0
WBGene00000788	cpz-1	0	0	0	0	0	4	0	0	0	0
WBGene00000789	cpz-2	0	0	0	0	2	5	0	3	19	17
WBGene00000792	crb-1	0	0	0	0	0	0	0	0	0	0
WBGene00000793	crh-1	1	1	0	0	0	0	6	0	17	19
WBGene00000794	crn-1	0	0	0	0	0	0	0	0	0	0
WBGene00000795	crn-2	0	0	0	0	0	0	0	0	1	0
WBGene00000796	crn-3	0	0	0	0	0	0	0	0	2	0
WBGene00000797	crn-4	0	0	0	0	0	0	0	0	0	0
WBGene00000798	crn-5	0	0	0	0	0	0	0	0	0	0
WBGene00000799	crn-6	0	0	0	0	0	0	0	0	0	0
WBGene00000800	cars-1	0	1	0	0	0	0	0	0	1	0
WBGene00000801	cars-2	0	0	0	0	0	0	0	0	0	0
WBGene00000802	crt-1	1	3	0	0	5	0	0	1	16	20
WBGene00000803	csb-1	0	0	0	0	0	0	0	0	0	0
WBGene00000804	csc-1	0	0	0	0	0	0	0	0	0	0
WBGene00000812	csk-1	0	0	0	0	2	0	0	0	0	0
WBGene00000813	csn-1	0	0	0	0	0	0	0	0	0	0
WBGene00000814	csn-2	0	4	0	0	0	0	0	0	0	0
WBGene00000815	csn-3	0	0	0	0	0	0	1	0	0	0
WBGene00000816	csn-4	1	0	0	0	0	0	7	0	2	3
WBGene00000817	csn-5	0	0	0	0	0	0	0	0	0	0
WBGene00000818	csn-6	0	0	0	0	0	0	0	0	0	0
WBGene00000819	csp-1	0	0	0	0	0	0	0	0	0	0
WBGene00000820	csp-2	0	0	0	0	0	0	0	0	0	0
WBGene00000822	csq-1	0	0	0	0	0	0	0	0	5	2
WBGene00000829	ctb-1	3	0	0	0	9	15	19	22	11	60
WBGene00000830	ctl-1	0	0	0	0	0	0	0	0	0	0
WBGene00000831	ctl-2	0	0	0	0	0	0	0	0	0	0
WBGene00000832	ctn-1	0	0	0	0	0	0	1	0	0	14
WBGene00000833	cts-1	1	0	1	0	0	0	11	0	3	14
WBGene00000834	cua-1	0	0	0	0	0	2	0	0	0	12
WBGene00000835	cuc-1	0	0	0	0	0	0	0	0	0	0
WBGene00000836	cul-1	0	0	0	0	0	0	2	0	0	1
WBGene00000837	cul-2	0	0	0	0	0	0	1	0	0	1
WBGene00000838	cul-3	0	0	0	0	0	0	0	0	0	0
WBGene00000839	cul-4	0	0	0	0	0	0	0	0	0	6
WBGene00000840	cul-5	0	0	0	0	0	0	2	0	0	1
WBGene00000841	cul-6	0	0	0	0	0	0	0	0	1	2
WBGene00000843	cup-2	0	0	0	0	0	0	0	0	0	0
WBGene00000845	cup-4	0	0	0	0	0	0	0	0	0	0
WBGene00000846	cup-5	0	0	0	0	0	0	0	0	0	0
WBGene00000854	cux-7	0	0	0	0	0	0	0	0	0	1
WBGene00000857	cwn-1	0	0	0	0	0	0	0	0	0	0
WBGene00000858	cwn-2	0	0	0	0	0	0	0	0	0	0
WBGene00000862	cwp-4	0	0	1	0	0	0	0	0	0	0
WBGene00000863	cya-1	0	0	0	0	0	0	0	0	0	0
WBGene00000864	cya-2	0	0	0	0	0	0	0	0	0	0
WBGene00000865	cyb-1	0	0	0	0	0	0	0	0	0	1
WBGene00000866	cyb-2.1	0	0	0	0	0	0	0	0	0	0
WBGene00000867	cyb-2.2	0	0	0	0	0	0	0	0	0	0
WBGene00000868	cyb-3	0	0	0	0	0	0	0	0	0	0
WBGene00000869	cyc-1	0	0	0	0	0	0	3	2	1	3
WBGene00000870	cyd-1	0	0	0	0	0	0	0	0	0	0
WBGene00000871	cye-1	0	0	0	0	0	0	0	0	0	0
WBGene00000872	cyk-1	0	0	0	0	0	0	0	0	0	0
WBGene00000874	cyk-3	0	0	0	0	0	0	2	0	0	0
WBGene00000875	cyk-4	0	0	0	0	0	0	0	0	0	5
WBGene00000876	cyl-1	0	0	0	0	0	0	0	0	0	0
WBGene00000877	cyn-1	0	0	0	0	0	0	0	0	0	0
WBGene00000878	cyn-2	0	0	0	0	0	0	0	0	0	0
WBGene00000879	cyn-3	0	0	0	0	0	0	0	0	1	0
WBGene00000880	cyn-4	0	0	0	0	0	0	0	0	0	0
WBGene00000881	cyn-5	0	0	0	0	3	5	0	0	8	0
WBGene00000882	cyn-6	0	0	0	0	0	0	0	0	0	0
WBGene00000883	cyn-7	4	3	0	0	4	0	0	3	7	10
WBGene00000884	cyn-8	0	0	0	0	0	0	0	0	0	0
WBGene00000885	cyn-9	0	0	0	0	0	0	0	0	0	0
WBGene00000886	cyn-10	0	0	0	0	0	0	0	0	0	0
WBGene00000887	cyn-11	0	0	0	0	0	0	0	0	0	0
WBGene00000888	cyn-12	0	0	0	0	0	0	0	0	0	0
WBGene00000889	cyn-13	0	0	0	0	0	0	0	0	0	0
WBGene00000890	sig-7	0	0	0	0	0	0	0	0	0	0
WBGene00000891	cyn-15	0	0	0	0	0	0	0	0	0	0
WBGene00000892	cyn-16	0	0	0	0	0	0	0	0	0	0
WBGene00000893	cyn-17	0	0	0	0	0	0	0	0	0	0
WBGene00000894	dab-1	0	0	0	0	0	0	0	0	0	1
WBGene00000895	dac-1	0	0	0	0	0	0	0	0	0	0
WBGene00000896	dad-1	0	0	0	0	0	0	0	0	0	1
WBGene00000897	daf-1	0	0	0	0	0	0	6	0	0	0
WBGene00000898	daf-2	2	0	0	0	0	0	1	0	1	6
WBGene00000899	daf-3	0	0	0	0	7	0	0	0	0	2
WBGene00000900	daf-4	0	0	0	0	0	0	0	0	2	0
WBGene00000901	daf-5	0	0	0	0	0	0	0	0	6	3
WBGene00000902	daf-6	0	0	0	0	0	0	0	0	0	0
WBGene00000903	daf-7	0	0	0	0	0	0	0	0	0	0
WBGene00000904	daf-8	0	0	0	0	0	0	0	0	0	0
WBGene00000905	daf-9	0	0	0	0	0	0	0	0	0	0
WBGene00000906	daf-10	0	0	0	0	0	0	0	0	0	0
WBGene00000907	daf-11	0	0	0	0	0	0	0	0	0	0
WBGene00000908	daf-12	0	1	0	0	4	0	1	0	0	19
WBGene00000910	daf-14	0	0	0	0	0	0	0	0	2	0
WBGene00000911	daf-15	0	3	0	0	0	0	0	0	4	11
WBGene00000912	daf-16	1	0	0	0	0	3	0	0	0	19
WBGene00000913	daf-18	0	0	0	0	2	0	0	0	0	0
WBGene00000914	daf-19	0	0	0	0	0	0	0	0	0	1
WBGene00000915	daf-21	6	1	0	0	0	0	18	10	10	36
WBGene00000917	daf-25	0	0	0	0	0	0	0	0	0	0
WBGene00000920	daf-28	0	0	0	0	0	0	0	0	0	0
WBGene00000923	daf-31	0	0	0	0	0	0	0	0	0	2
WBGene00000928	dao-2	0	0	0	0	0	0	0	0	0	0
WBGene00000929	dao-3	0	0	0	0	0	0	0	0	0	0
WBGene00000930	dao-4	0	0	0	0	0	0	0	0	0	0
WBGene00000931	dao-5	0	0	0	0	0	2	0	0	7	8
WBGene00000932	dao-6	0	0	0	0	0	0	0	0	0	0
WBGene00000933	dap-3	0	0	0	0	5	0	0	0	3	0
WBGene00000934	dat-1	0	0	0	0	0	0	0	0	0	0
WBGene00000935	daz-1	0	0	0	0	0	0	0	0	0	0
WBGene00000936	dbl-1	0	0	0	0	0	0	0	0	0	2
WBGene00000937	dbr-1	0	0	0	0	0	0	0	0	0	0
WBGene00000938	dcp-66	0	0	0	0	0	0	17	2	5	25
WBGene00000939	dcr-1	0	2	0	0	0	0	0	1	0	2
WBGene00000940	dcs-1	0	0	0	0	0	0	0	0	0	0
WBGene00000941	ddp-1	0	0	0	0	0	0	0	0	0	1
WBGene00000942	deb-1	0	0	0	0	1	0	0	0	23	23
WBGene00000950	deg-1	0	0	0	0	0	0	0	0	0	0
WBGene00000951	deg-3	0	0	0	0	0	0	0	0	0	0
WBGene00000952	del-1	0	0	0	0	0	0	0	0	0	0
WBGene00000953	del-2	0	0	0	0	0	0	0	0	0	0
WBGene00000955	des-2	0	0	0	0	0	0	0	0	0	0
WBGene00000958	dgk-1	0	0	0	0	0	0	0	0	0	2
WBGene00000959	dgk-2	0	0	0	0	0	0	0	0	0	0
WBGene00000960	dgk-3	0	0	0	0	0	0	0	0	0	0
WBGene00000961	dgn-1	0	0	0	0	0	0	0	0	1	0
WBGene00000962	dhc-1	0	3	0	0	2	6	3	5	17	35
WBGene00000963	dhp-1	0	1	0	0	0	0	0	0	0	0
WBGene00000964	dhp-2	0	0	0	0	0	0	0	0	0	0
WBGene00000965	dhs-1	0	0	0	0	0	0	0	0	0	0
WBGene00000966	dhs-2	0	0	0	0	0	0	0	0	0	6
WBGene00000967	dhs-3	0	0	0	0	0	0	0	0	0	1
WBGene00000968	dhs-4	0	0	0	0	0	0	0	0	1	0
WBGene00000969	dhs-5	0	0	0	0	0	0	0	0	0	0
WBGene00000970	dhs-6	0	0	0	0	2	0	0	0	0	0
WBGene00000972	dhs-8	0	0	0	0	0	0	0	0	0	0
WBGene00000973	dhs-9	0	0	0	0	0	0	0	0	5	2
WBGene00000974	dhs-11	0	0	0	0	0	0	0	0	0	0
WBGene00000975	dhs-12	0	0	0	0	0	0	0	0	1	0
WBGene00000976	dhs-13	0	0	0	0	0	0	4	0	0	1
WBGene00000978	dhs-15	0	0	0	0	0	0	0	0	0	0
WBGene00000979	dhs-16	0	0	0	0	0	0	0	0	0	0
WBGene00000980	dhs-17	0	0	0	0	0	0	0	0	0	0
WBGene00000982	dhs-19	0	6	0	0	0	0	0	0	0	7
WBGene00000983	dhs-20	0	0	0	0	0	0	0	0	1	0
WBGene00000984	dhs-21	0	0	0	0	0	0	0	0	0	1
WBGene00000985	dhs-22	0	0	0	0	0	0	1	0	0	0
WBGene00000987	dhs-24	0	0	0	0	0	0	0	0	0	3
WBGene00000988	dhs-25	0	0	0	0	0	0	5	0	0	0
WBGene00000989	dhs-26	0	0	0	0	0	0	0	0	0	0
WBGene00000990	dhs-27	0	0	0	0	0	0	0	0	0	0
WBGene00000991	dhs-28	0	0	0	0	0	0	0	0	0	2
WBGene00000993	dhs-30	0	11	0	0	0	0	0	0	0	0
WBGene00000994	dic-1	0	0	0	0	0	0	0	0	0	0
WBGene00000995	die-1	0	0	0	0	0	0	0	0	0	4
WBGene00000996	dif-1	0	0	0	0	0	0	0	0	0	4
WBGene00000998	dig-1	18	0	5	0	0	1	0	3	35	259
WBGene00001000	dim-1	0	0	0	0	0	0	0	0	8	11
WBGene00001001	dis-3	0	0	0	0	0	0	0	0	0	0
WBGene00001002	div-1	0	0	0	0	0	0	0	0	0	0
WBGene00001005	dlc-1	0	0	0	0	0	0	0	0	0	0
WBGene00001006	dlg-1	0	0	0	0	1	0	10	0	0	15
WBGene00001007	dli-1	0	2	0	0	0	0	0	0	0	3
WBGene00001008	dlk-1	0	0	0	0	0	0	0	0	2	7
WBGene00001016	dna-2	0	0	0	0	0	0	0	0	0	0
WBGene00001017	dnc-1	0	0	0	0	2	0	2	0	6	4
WBGene00001018	dnc-2	0	0	0	0	0	0	0	0	0	0
WBGene00001019	dnj-1	0	0	0	0	0	0	0	0	0	0
WBGene00001020	dnj-2	0	0	0	0	0	0	0	0	0	0
WBGene00001021	dnj-3	0	0	0	0	0	0	0	0	1	0
WBGene00001022	dnj-4	0	0	0	0	0	0	0	0	0	0
WBGene00001023	dnj-5	0	5	0	0	0	0	1	0	0	1
WBGene00001025	dnj-7	0	0	0	0	0	0	0	0	0	5
WBGene00001026	dnj-8	0	0	0	0	0	0	0	0	0	2
WBGene00001027	dnj-9	0	0	0	0	0	0	0	0	2	5
WBGene00001028	dnj-10	0	0	0	0	0	0	0	0	0	0
WBGene00001029	dnj-11	0	0	0	0	0	0	0	0	0	1
WBGene00001030	dnj-12	0	0	0	0	0	0	0	0	4	14
WBGene00001031	dnj-13	2	1	0	0	0	0	0	0	6	16
WBGene00001032	dnj-14	0	0	0	0	0	0	0	0	0	0
WBGene00001033	dnj-15	0	0	0	0	0	0	0	0	0	0
WBGene00001034	dnj-16	0	0	0	0	0	0	0	0	0	2
WBGene00001035	dnj-17	0	0	0	0	0	0	0	0	0	7
WBGene00001036	dnj-18	0	0	0	0	6	0	0	0	0	0
WBGene00001037	dnj-19	0	0	0	0	2	0	0	0	1	2
WBGene00001038	dnj-20	3	0	0	0	2	0	8	0	1	6
WBGene00001039	dnj-21	0	0	0	0	0	0	0	0	0	0
WBGene00001040	dnj-22	0	0	0	0	0	0	0	0	0	0
WBGene00001041	dnj-23	0	0	0	0	0	0	0	0	0	0
WBGene00001042	dnj-24	0	0	0	0	0	0	2	0	0	6
WBGene00001043	dnj-25	0	0	0	0	0	0	0	0	4	0
WBGene00001044	dnj-26	0	0	0	0	0	0	0	0	0	0
WBGene00001045	dnj-27	0	0	0	0	0	0	11	0	0	5
WBGene00001046	dnj-28	0	0	0	0	0	0	0	0	0	0
WBGene00001047	dnj-29	0	0	0	0	0	0	0	0	8	4
WBGene00001048	dnj-30	0	0	0	0	0	0	0	0	0	0
WBGene00001049	dog-1	0	0	0	0	0	0	0	0	0	0
WBGene00001050	dom-3	0	0	0	0	0	0	0	0	0	0
WBGene00001051	cks-1	0	0	0	0	0	0	0	0	0	0
WBGene00001052	dop-1	0	0	0	0	0	0	0	0	7	0
WBGene00001053	dop-2	0	0	0	0	0	0	0	0	0	3
WBGene00001054	dpf-1	0	0	0	0	0	0	0	0	0	0
WBGene00001055	dpf-2	0	0	0	0	0	0	0	0	0	6
WBGene00001056	dpf-3	0	0	0	0	0	0	3	0	0	3
WBGene00001057	dpf-4	0	0	0	0	2	0	0	0	4	0
WBGene00001058	dpf-5	0	0	0	0	0	0	0	0	0	0
WBGene00001059	dpf-6	0	0	0	0	0	0	0	0	0	0
WBGene00001060	dpf-7	0	0	0	0	0	0	0	0	0	3
WBGene00001061	dpl-1	0	0	0	0	0	0	0	0	0	0
WBGene00001063	dpy-1	0	0	0	0	0	0	0	0	0	0
WBGene00001064	dpy-2	0	0	0	0	0	0	0	0	0	0
WBGene00001065	dpy-3	0	0	0	0	0	0	0	0	0	0
WBGene00001066	dpy-4	0	0	0	0	0	0	0	0	0	0
WBGene00001067	dpy-5	0	0	0	0	0	0	0	0	0	0
WBGene00001068	dpy-6	0	0	0	0	0	0	0	0	0	0
WBGene00001069	dpy-7	0	0	0	0	0	0	0	0	0	0
WBGene00001070	dpy-8	0	0	0	0	0	0	0	0	0	0
WBGene00001071	dpy-9	0	0	0	0	0	0	0	0	0	0
WBGene00001072	dpy-10	0	0	0	0	0	0	0	0	0	0
WBGene00001073	dpy-11	0	0	0	0	0	0	1	0	2	0
WBGene00001074	dpy-13	0	0	0	0	0	0	0	0	0	0
WBGene00001075	dpy-14	0	0	0	0	0	0	0	0	0	0
WBGene00001077	dpy-18	0	0	0	0	0	0	0	0	0	0
WBGene00001078	dpy-19	0	0	0	0	0	0	0	0	0	0
WBGene00001079	dpy-20	0	0	0	0	0	0	0	0	0	0
WBGene00001080	dpy-21	0	0	0	0	0	2	2	4	3	0
WBGene00001081	dpy-22	0	3	0	0	1	2	3	3	2	25
WBGene00001082	dpy-23	0	0	0	0	0	0	0	0	0	2
WBGene00001085	dpy-26	0	0	0	0	0	0	0	0	0	1
WBGene00001086	dpy-27	0	0	0	0	0	0	0	0	0	6
WBGene00001087	dpy-28	0	0	0	0	0	1	0	0	0	4
WBGene00001088	dpy-30	0	0	0	0	0	0	0	0	0	0
WBGene00001089	dre-1	0	0	0	0	0	0	4	0	3	5
WBGene00001090	drh-1	0	0	0	0	0	0	0	0	0	1
WBGene00001091	drh-2	0	0	0	0	0	0	0	3	2	6
WBGene00001092	dro-1	0	0	0	0	0	0	0	0	0	0
WBGene00001093	drp-1	0	1	0	0	0	0	6	0	0	0
WBGene00001094	dars-1	0	0	0	0	0	0	0	0	0	0
WBGene00001095	dars-2	0	0	0	0	0	0	0	0	0	0
WBGene00001096	dsc-1	0	0	0	0	0	0	0	0	0	0
WBGene00001099	dsc-4	0	0	0	0	0	0	0	0	0	4
WBGene00001101	dsh-1	0	0	0	0	0	0	0	0	3	11
WBGene00001102	dsh-2	0	0	0	0	0	0	0	0	0	0
WBGene00001103	dsl-1	0	0	0	0	0	0	0	0	0	0
WBGene00001104	dsl-2	0	0	0	0	0	0	0	0	0	0
WBGene00001105	dsl-3	0	0	0	0	0	0	0	0	0	0
WBGene00001106	dsl-4	0	0	0	0	0	0	0	0	0	0
WBGene00001107	dsl-5	0	0	0	0	0	0	0	0	0	0
WBGene00001108	dsl-6	0	0	0	0	0	0	0	0	0	0
WBGene00001109	dsl-7	0	0	0	0	0	0	0	0	0	0
WBGene00001110	duo-1	0	0	0	0	0	0	0	0	0	0
WBGene00001112	duo-3	0	0	0	0	0	0	0	0	0	0
WBGene00001113	dur-1	0	0	0	0	0	0	0	0	0	0
WBGene00001115	dyb-1	0	0	0	0	0	0	0	0	0	8
WBGene00001116	dyc-1	0	3	3	0	0	0	0	0	0	0
WBGene00001117	dyf-1	0	0	0	0	0	0	0	0	0	0
WBGene00001118	dyf-2	0	0	0	0	0	0	0	0	0	0
WBGene00001119	dyf-3	0	0	0	0	0	0	0	0	0	0
WBGene00001121	dyf-5	0	0	0	0	0	0	0	0	0	0
WBGene00001122	dyf-6	0	0	0	0	0	0	0	0	0	0
WBGene00001123	dyf-7	0	0	0	0	0	0	0	0	0	0
WBGene00001127	dyf-11	0	0	0	0	0	0	0	0	0	0
WBGene00001129	dyf-13	0	0	0	0	0	0	0	0	0	0
WBGene00001130	dyn-1	0	0	0	0	0	0	3	0	0	6
WBGene00001131	dys-1	0	0	0	0	0	0	0	0	1	10
WBGene00001132	alp-1	0	0	0	0	0	0	0	1	0	0
WBGene00001133	eat-2	0	0	0	0	0	0	0	0	0	0
WBGene00001134	eat-3	0	0	0	0	0	1	13	0	0	0
WBGene00001135	eat-4	1	0	0	0	0	0	0	0	6	0
WBGene00001136	eat-5	0	0	0	0	0	0	0	0	0	0
WBGene00001137	eat-6	2	0	0	0	7	5	0	3	28	26
WBGene00001145	eat-16	0	0	0	0	0	0	3	0	0	0
WBGene00001148	eat-20	0	0	0	0	0	0	0	0	0	0
WBGene00001149	bcat-1	0	0	0	0	2	0	0	0	4	0
WBGene00001150	ech-1.1	0	0	0	0	0	0	0	0	0	0
WBGene00001151	ech-2	0	0	0	0	0	0	0	0	0	0
WBGene00001152	ech-3	0	0	0	0	0	0	0	0	0	0
WBGene00001153	ech-4	0	0	0	0	0	0	0	0	0	0
WBGene00001154	ech-5	0	0	0	0	0	0	0	0	0	0
WBGene00001155	ech-6	0	0	0	0	0	0	0	0	0	7
WBGene00001156	ech-7	0	0	0	0	0	0	0	0	0	0
WBGene00001157	ech-8	0	0	0	0	0	0	0	0	0	14
WBGene00001159	eff-1	0	0	0	0	0	0	0	0	0	0
WBGene00001160	efk-1	0	0	0	0	0	2	3	0	10	2
WBGene00001161	efl-1	0	0	0	0	0	0	0	0	0	0
WBGene00001162	efl-2	0	0	0	0	0	0	2	0	3	2
WBGene00001163	efn-2	0	0	0	0	0	0	0	0	0	0
WBGene00001164	efn-3	0	0	0	0	0	0	0	0	0	0
WBGene00001165	efn-4	0	0	0	0	0	0	0	0	0	0
WBGene00001166	eftu-2	0	0	0	0	1	5	0	4	0	0
WBGene00001167	eef-2	4	6	0	0	18	9	12	1	19	28
WBGene00001168	eef-1A.1	2	0	12	0	0	1	13	4	26	36
WBGene00001169	eef-1A.2	5	7	0	0	7	0	15	1	20	3
WBGene00001170	egl-1	0	0	0	0	0	0	0	0	0	0
WBGene00001171	egl-2	0	1	0	0	0	0	0	0	0	0
WBGene00001172	egl-3	0	0	0	0	0	0	0	0	11	22
WBGene00001173	egl-4	1	0	0	0	1	0	5	3	3	10
WBGene00001174	egl-5	0	0	0	0	0	0	0	4	0	1
WBGene00001175	egl-6	0	0	0	0	0	0	0	0	0	0
WBGene00001177	egl-8	0	0	0	0	2	0	0	3	2	24
WBGene00001178	egl-9	0	0	0	0	0	0	9	0	2	0
WBGene00001179	egl-10	0	0	0	0	0	0	4	0	0	0
WBGene00001182	egl-13	0	0	0	0	0	0	0	0	0	0
WBGene00001184	egl-15	0	0	0	0	0	0	0	0	0	0
WBGene00001185	egl-17	0	0	0	0	0	0	0	0	0	0
WBGene00001186	egl-18	0	0	0	0	0	0	0	0	0	0
WBGene00001187	egl-19	0	0	0	0	0	0	7	0	2	5
WBGene00001188	egl-20	1	0	0	0	0	0	0	0	0	14
WBGene00001189	egl-21	0	0	0	0	0	0	0	0	5	0
WBGene00001190	egl-23	0	0	0	0	0	0	0	0	2	10
WBGene00001193	egl-26	0	0	0	0	0	0	0	0	0	0
WBGene00001194	egl-27	0	0	0	0	0	0	3	0	7	1
WBGene00001196	egl-30	0	8	0	0	1	2	3	1	16	7
WBGene00001202	egl-36	0	0	0	0	0	0	0	0	0	0
WBGene00001204	egl-38	0	0	0	0	0	0	0	0	0	0
WBGene00001207	egl-43	0	0	0	0	0	0	0	0	0	0
WBGene00001208	egl-44	0	0	0	0	0	1	0	7	5	1
WBGene00001209	egl-45	0	2	0	0	0	0	0	0	1	9
WBGene00001210	egl-46	0	0	0	0	0	0	0	0	0	0
WBGene00001211	egl-47	0	0	0	0	0	0	0	0	0	0
WBGene00001214	ego-1	0	0	0	0	0	0	1	0	0	0
WBGene00001215	ego-2	0	0	0	0	0	0	3	8	0	14
WBGene00001224	ehs-1	0	0	0	0	0	0	0	0	0	0
WBGene00001225	eif-3.B	0	0	0	0	0	0	0	0	0	0
WBGene00001226	eif-3.C	0	0	0	0	0	0	0	0	0	1
WBGene00001227	eif-3.D	0	0	0	0	0	0	0	0	1	2
WBGene00001228	eif-3.E	0	0	0	0	0	0	0	0	0	2
WBGene00001229	eif-3.F	1	0	0	0	0	0	0	0	0	0
WBGene00001230	eif-3.G	0	0	0	0	0	1	1	0	0	10
WBGene00001231	eif-3.H	0	0	0	0	0	0	0	0	0	0
WBGene00001232	eif-3.I	0	0	0	0	0	0	0	0	5	0
WBGene00001233	eif-3.K	0	0	0	0	0	0	0	0	0	1
WBGene00001234	eif-6	0	3	0	0	3	0	0	0	0	2
WBGene00001235	elb-1	0	0	0	0	0	0	0	0	0	0
WBGene00001236	elc-1	0	0	0	0	0	0	4	0	0	0
WBGene00001237	elc-2	0	0	0	0	0	0	0	0	0	0
WBGene00001239	elo-1	0	0	0	0	0	0	0	5	4	5
WBGene00001240	elo-2	0	0	0	0	0	0	0	0	6	2
WBGene00001241	elo-3	0	0	0	0	0	0	0	0	6	0
WBGene00001242	elo-4	0	0	0	0	0	0	0	0	0	0
WBGene00001243	elo-5	0	0	0	0	0	0	0	0	0	3
WBGene00001244	elo-6	0	0	0	0	0	0	0	0	5	7
WBGene00001245	elo-7	0	0	0	0	0	0	0	0	0	0
WBGene00001246	elo-8	0	0	0	0	0	0	0	0	0	0
WBGene00001247	elo-9	0	0	0	0	0	0	0	0	0	0
WBGene00001248	elp-1	0	0	0	0	0	0	0	0	0	0
WBGene00001249	elt-1	0	0	0	0	0	0	0	0	0	0
WBGene00001250	elt-2	0	0	0	0	0	0	0	0	0	0
WBGene00001251	elt-3	0	0	0	0	0	0	0	0	0	9
WBGene00001253	elt-6	0	0	0	0	0	0	0	0	0	4
WBGene00001258	emb-4	0	2	0	0	0	0	0	0	1	0
WBGene00001259	emb-5	0	0	0	0	0	4	0	4	8	0
WBGene00001262	emb-8	4	1	0	0	0	0	3	0	2	15
WBGene00001263	emb-9	0	0	9	0	0	0	0	0	8	36
WBGene00001281	emb-27	0	0	0	0	0	0	0	0	0	0
WBGene00001284	emb-30	0	0	0	0	0	0	0	0	0	0
WBGene00001303	emo-1	0	0	0	0	0	0	0	0	0	0
WBGene00001309	emr-1	0	0	0	0	0	0	0	0	5	0
WBGene00001310	end-1	0	0	0	0	0	0	0	0	0	0
WBGene00001311	end-3	0	0	0	0	0	0	0	0	0	0
WBGene00001320	ent-1	0	0	0	0	0	0	0	0	0	0
WBGene00001324	eor-1	0	0	0	0	7	0	0	0	0	3
WBGene00001325	eor-2	0	0	0	0	0	0	2	0	2	1
WBGene00001328	epi-1	4	0	0	0	0	0	0	1	8	13
WBGene00001329	epn-1	0	0	0	0	0	0	0	0	0	0
WBGene00001330	eps-8	0	0	0	0	4	4	0	6	2	15
WBGene00001331	erd-2	0	1	0	0	0	0	0	0	0	3
WBGene00001332	eri-1	0	0	0	0	0	0	0	0	0	0
WBGene00001333	erm-1	0	1	0	0	0	0	0	6	4	14
WBGene00001334	ero-1	0	4	0	0	0	0	0	0	3	1
WBGene00001335	erp-1	0	0	0	0	0	0	0	0	0	0
WBGene00001336	qars-1	0	0	0	0	0	2	2	0	0	2
WBGene00001337	ears-1	0	0	0	0	0	0	0	0	0	1
WBGene00001338	ears-2	0	0	0	0	0	0	1	0	0	3
WBGene00001340	etr-1	0	0	0	0	0	0	0	0	0	0
WBGene00001345	fos-1	0	10	0	0	0	0	1	0	0	7
WBGene00001352	evl-14	0	1	0	0	0	0	0	0	5	8
WBGene00001358	evl-20	0	0	0	0	0	0	0	0	0	0
WBGene00001365	exc-4	0	0	0	0	1	0	2	0	0	0
WBGene00001366	exc-5	0	9	0	0	0	0	3	0	0	17
WBGene00001368	exc-7	0	0	0	0	0	0	0	0	2	7
WBGene00001371	exl-1	0	0	0	0	0	0	0	0	0	0
WBGene00001372	exo-3	0	0	0	0	0	0	0	0	0	0
WBGene00001373	exp-1	0	0	0	0	0	0	0	0	0	0
WBGene00001374	exp-2	0	0	0	0	0	0	0	0	0	3
WBGene00001377	eya-1	0	0	0	0	0	0	0	0	0	0
WBGene00001385	far-1	5	0	0	0	0	0	0	0	11	35
WBGene00001386	far-2	0	0	0	0	0	0	0	0	3	61
WBGene00001387	far-3	0	0	0	0	0	0	0	0	0	0
WBGene00001389	far-5	0	0	0	0	0	0	0	0	0	0
WBGene00001390	far-6	2	0	0	0	0	0	0	0	0	2
WBGene00001391	far-7	0	0	0	0	0	0	0	0	0	0
WBGene00001392	far-8	0	0	0	0	0	0	0	0	0	0
WBGene00001393	fat-1	0	0	0	0	0	0	0	0	1	0
WBGene00001394	fat-2	0	0	0	0	3	0	0	0	0	0
WBGene00001395	fat-3	0	0	0	0	0	0	0	1	1	4
WBGene00001396	fat-4	0	0	0	0	0	4	0	0	2	0
WBGene00001397	fat-5	0	0	0	0	0	0	0	0	0	0
WBGene00001398	fat-6	0	1	0	0	4	1	0	4	4	0
WBGene00001399	fat-7	0	0	0	0	0	0	0	0	0	3
WBGene00001400	fax-1	0	0	0	0	0	0	0	0	0	0
WBGene00001401	fbf-1	0	0	0	0	0	0	0	0	0	0
WBGene00001402	fbf-2	0	0	0	0	0	0	0	0	0	0
WBGene00001403	fbl-1	0	0	0	0	0	0	0	0	0	2
WBGene00001404	fbp-1	1	0	0	0	0	0	0	0	3	0
WBGene00001405	fce-1	0	3	0	0	0	0	0	0	0	1
WBGene00001406	fce-2	0	0	0	0	0	0	0	0	0	0
WBGene00001410	feh-1	0	0	0	0	0	0	0	0	0	0
WBGene00001411	fem-1	0	0	0	0	0	0	2	0	0	0
WBGene00001412	fem-2	0	0	0	0	0	0	0	0	0	0
WBGene00001413	fem-3	0	3	0	0	0	0	0	0	0	0
WBGene00001414	fer-1	0	0	0	0	0	0	0	0	0	0
WBGene00001423	fib-1	0	0	0	0	0	0	4	2	6	2
WBGene00001424	fis-1	0	0	0	0	0	0	0	0	0	0
WBGene00001425	fis-2	0	0	0	0	2	0	0	0	0	0
WBGene00001426	fkb-1	0	0	0	0	0	0	0	0	0	0
WBGene00001427	fkb-2	0	0	0	0	0	0	0	4	0	4
WBGene00001428	fkb-3	0	0	0	0	0	0	0	0	0	0
WBGene00001429	fkb-4	0	0	0	0	0	0	0	0	0	0
WBGene00001430	fkb-5	0	0	0	0	0	0	0	0	0	0
WBGene00001431	fkb-6	0	1	0	0	0	0	0	0	0	0
WBGene00001432	fkb-7	0	0	0	0	0	0	0	0	0	0
WBGene00001433	fkb-8	0	0	0	0	0	0	0	0	0	0
WBGene00001434	fkh-2	0	0	0	0	0	0	0	0	0	0
WBGene00001436	fkh-4	0	0	0	0	0	0	0	0	0	0
WBGene00001438	fkh-6	0	0	0	0	0	0	0	0	0	0
WBGene00001439	fkh-7	0	0	0	0	0	0	6	0	1	3
WBGene00001440	fkh-8	0	0	0	0	0	0	0	0	0	0
WBGene00001441	fkh-9	0	4	0	0	5	2	21	0	6	33
WBGene00001443	fli-1	0	0	0	0	0	0	0	0	0	0
WBGene00001444	flp-1	0	0	0	0	0	0	0	0	0	0
WBGene00001445	flp-2	0	0	0	0	0	0	0	0	0	0
WBGene00001446	flp-3	0	0	0	0	0	0	0	0	0	0
WBGene00001447	flp-4	0	0	0	0	0	0	0	0	0	0
WBGene00001448	flp-5	0	0	0	0	0	0	0	0	0	0
WBGene00001449	flp-6	0	0	0	0	0	0	0	0	0	0
WBGene00001450	flp-7	0	0	0	0	0	0	0	0	0	0
WBGene00001451	flp-8	0	0	0	0	0	0	0	0	0	0
WBGene00001452	flp-9	0	0	0	0	0	0	0	0	1	0
WBGene00001453	flp-10	0	0	0	0	0	0	0	0	0	0
WBGene00001454	flp-11	0	0	0	0	0	0	0	0	0	0
WBGene00001455	flp-12	0	0	0	0	0	0	0	0	0	4
WBGene00001456	flp-13	0	0	0	0	0	0	0	0	0	0
WBGene00001457	flp-14	0	0	0	0	0	0	0	0	0	0
WBGene00001458	flp-15	0	0	0	0	0	0	0	0	0	0
WBGene00001459	flp-16	1	0	0	0	3	0	0	0	4	5
WBGene00001460	flp-17	0	0	0	0	0	0	0	0	0	0
WBGene00001461	flp-18	0	0	0	0	0	0	0	0	0	0
WBGene00001462	flp-19	0	0	0	0	0	0	0	0	0	0
WBGene00001463	flp-20	0	0	0	0	0	0	0	0	5	0
WBGene00001464	flp-21	0	0	0	0	0	0	0	0	0	0
WBGene00001465	flr-1	0	0	0	0	0	0	0	0	0	0
WBGene00001466	flr-2	0	0	0	0	0	0	0	0	0	0
WBGene00001470	baz-2	0	0	0	0	0	0	0	0	5	0
WBGene00001475	fmi-1	0	0	0	0	0	0	0	0	0	0
WBGene00001476	fmo-1	0	0	0	0	9	0	0	0	0	7
WBGene00001477	fmo-2	0	0	0	0	0	0	0	0	0	0
WBGene00001478	fmo-3	0	0	0	0	0	0	0	0	0	0
WBGene00001479	fmo-4	0	0	0	0	0	0	0	0	2	0
WBGene00001480	fmo-5	0	0	0	0	0	0	0	0	0	10
WBGene00001481	fog-1	0	0	0	0	0	0	0	0	0	0
WBGene00001482	fog-2	0	0	0	0	0	0	0	0	0	0
WBGene00001483	fog-3	0	0	0	0	0	0	0	0	0	0
WBGene00001484	fox-1	0	0	0	0	0	0	0	0	0	0
WBGene00001485	fre-1	0	0	0	0	0	0	0	0	0	0
WBGene00001486	frh-1	0	0	0	0	0	0	0	0	0	0
WBGene00001487	frk-1	0	0	0	0	0	0	0	0	0	0
WBGene00001488	frm-1	0	6	4	0	0	0	8	11	44	84
WBGene00001489	frm-2	0	0	0	0	0	0	0	0	0	0
WBGene00001490	frm-3	2	0	0	0	0	0	0	0	0	5
WBGene00001491	frm-4	3	0	0	0	0	0	0	1	0	0
WBGene00001492	frm-5.1	0	0	0	0	4	0	0	0	2	0
WBGene00001493	frm-7	0	2	0	0	0	0	0	2	8	4
WBGene00001494	frm-8	0	0	0	0	0	0	0	0	0	0
WBGene00001495	frm-9	0	0	0	0	0	0	0	2	0	0
WBGene00001496	frm-10	0	1	0	0	0	0	3	4	0	3
WBGene00001497	fars-1	0	0	0	0	0	0	0	0	0	0
WBGene00001498	fars-3	0	1	0	0	0	0	9	0	0	0
WBGene00001499	fsn-1	0	0	0	0	4	0	0	0	0	0
WBGene00001500	ftn-1	0	0	0	0	0	0	0	0	0	0
WBGene00001501	ftn-2	0	0	0	0	0	0	0	0	0	5
WBGene00001502	ftt-2	0	1	0	0	2	0	1	5	2	29
WBGene00001503	fum-1	0	0	0	0	0	0	0	0	1	7
WBGene00001505	fut-1	0	0	0	0	0	0	0	0	2	0
WBGene00001506	fut-2	0	0	0	0	0	0	0	0	0	0
WBGene00001507	fut-4	0	0	0	0	0	0	0	0	0	0
WBGene00001508	fut-8	0	0	0	0	0	0	0	0	0	2
WBGene00001509	fzo-1	0	0	0	0	0	0	0	0	0	0
WBGene00001510	fzr-1	0	0	3	0	0	0	3	0	7	1
WBGene00001511	fzy-1	0	0	0	0	0	0	0	0	0	0
WBGene00001512	gab-1	0	0	0	0	0	0	0	0	0	0
WBGene00001513	gad-1	0	0	0	0	0	0	0	0	0	0
WBGene00001514	xnd-1	0	0	0	0	0	0	2	0	0	0
WBGene00001515	gap-1	0	0	0	0	0	0	1	0	0	0
WBGene00001516	gap-2	0	0	0	0	0	0	0	0	0	1
WBGene00001517	gar-1	0	0	0	0	0	0	0	0	0	0
WBGene00001518	gar-2	0	0	0	0	0	0	0	0	0	0
WBGene00001519	gar-3	0	0	0	0	0	0	1	3	0	1
WBGene00001520	gas-1	0	0	0	0	0	0	3	0	0	3
WBGene00001522	gbh-1	0	0	0	0	0	0	0	0	0	1
WBGene00001523	gbh-2	0	0	0	0	0	0	0	6	2	2
WBGene00001526	gck-1	0	0	0	0	0	0	0	0	0	0
WBGene00001527	gcs-1	0	0	0	0	0	0	0	0	0	4
WBGene00001528	gcy-1	0	0	0	0	0	0	0	0	0	0
WBGene00001529	gcy-2	0	0	0	0	0	0	0	0	0	0
WBGene00001530	gcy-3	0	0	0	0	0	0	0	0	0	0
WBGene00001531	gcy-4	0	0	0	0	0	0	0	0	0	0
WBGene00001532	gcy-5	0	0	0	0	0	0	0	0	0	0
WBGene00001534	gcy-7	0	0	0	0	0	0	0	0	0	0
WBGene00001535	gcy-8	0	0	0	0	0	0	0	0	0	0
WBGene00001536	gcy-9	0	0	0	0	0	0	0	0	0	0
WBGene00001537	gcy-11	0	0	0	0	0	0	0	0	0	0
WBGene00001538	gcy-12	0	0	0	0	0	0	0	0	0	0
WBGene00001539	gcy-13	0	0	0	0	0	0	0	0	0	0
WBGene00001540	gcy-14	0	0	0	0	0	0	0	0	0	0
WBGene00001541	gcy-15	0	0	0	0	0	0	0	0	0	0
WBGene00001542	gcy-17	0	0	0	0	0	0	0	0	0	0
WBGene00001543	gcy-18	0	0	0	0	0	0	0	0	0	0
WBGene00001545	gcy-20	0	0	0	0	0	0	0	0	0	0
WBGene00001546	gcy-21	0	0	0	0	0	0	0	0	0	0
WBGene00001547	gcy-22	0	0	0	0	0	0	0	0	0	0
WBGene00001548	gcy-23	0	0	0	0	0	0	0	0	0	0
WBGene00001549	gcy-25	0	0	0	0	0	0	0	0	0	0
WBGene00001551	gcy-31	0	0	0	0	0	0	0	0	0	0
WBGene00001552	gcy-32	0	0	0	0	0	0	0	0	0	0
WBGene00001553	gcy-33	0	0	0	0	0	0	0	0	0	0
WBGene00001554	gcy-34	0	0	0	0	0	0	0	0	0	0
WBGene00001555	gcy-35	0	0	0	0	0	0	0	0	0	0
WBGene00001556	gcy-36	0	0	0	0	0	0	0	0	0	0
WBGene00001557	gcy-37	0	0	0	0	0	0	0	0	0	0
WBGene00001558	gdi-1	0	0	0	0	9	0	7	0	1	0
WBGene00001559	gei-1	0	0	0	0	0	0	0	0	0	0
WBGene00001560	gei-3	0	0	0	0	0	0	0	0	0	1
WBGene00001561	gei-4	1	8	0	0	0	0	0	0	12	14
WBGene00001562	lin-66	6	0	0	0	0	0	1	1	2	9
WBGene00001563	gei-6	0	0	0	0	0	0	0	0	0	3
WBGene00001564	icl-1	6	0	0	0	1	0	0	0	9	18
WBGene00001565	gei-8	0	0	0	0	0	0	1	0	5	21
WBGene00001566	acdh-13	0	0	0	0	0	0	0	0	0	4
WBGene00001568	snpc-4	0	0	0	0	0	0	0	0	0	0
WBGene00001569	meg-3	0	0	0	0	0	0	0	0	0	0
WBGene00001570	gei-13	0	0	0	0	0	0	0	0	0	2
WBGene00001571	gei-14	0	0	0	0	0	0	0	0	0	0
WBGene00001572	gei-15	0	0	0	0	0	0	0	0	0	0
WBGene00001574	gei-17	0	3	0	0	0	0	0	0	0	3
WBGene00001575	gei-18	0	0	0	0	0	0	0	0	0	0
WBGene00001577	gem-4	0	0	0	0	0	0	0	0	0	1
WBGene00001578	ges-1	0	0	0	0	0	0	0	0	0	0
WBGene00001579	gex-2	1	0	0	0	0	0	0	0	1	0
WBGene00001580	gex-3	0	0	0	0	0	0	0	0	0	0
WBGene00001581	gfi-1	2	0	0	0	15	7	0	1	31	22
WBGene00001582	gfi-2	0	0	0	0	0	0	3	0	4	5
WBGene00001583	gfi-3	0	0	0	0	0	0	0	0	2	0
WBGene00001584	nrde-4	0	0	0	0	0	0	0	0	0	6
WBGene00001585	gfl-1	0	0	0	0	0	0	0	0	0	0
WBGene00001586	ggr-1	0	0	0	0	0	0	0	0	0	0
WBGene00001587	ggr-2	0	0	0	0	0	0	0	0	0	0
WBGene00001588	ggr-3	0	0	0	0	0	0	0	0	0	6
WBGene00001589	gip-1	0	0	0	0	0	0	0	0	0	5
WBGene00001590	C45G3.3	0	0	0	0	0	0	0	0	0	0
WBGene00001591	glc-1	0	0	0	0	0	0	0	0	0	0
WBGene00001592	glc-2	0	0	0	0	0	0	0	0	0	0
WBGene00001593	glc-3	0	0	0	0	0	0	0	0	0	0
WBGene00001594	glc-4	0	0	0	0	0	0	0	0	0	0
WBGene00001595	gld-1	0	2	0	0	0	0	0	0	0	0
WBGene00001596	gld-2	0	0	0	0	1	2	3	0	4	6
WBGene00001597	gld-3	0	0	0	0	0	0	0	0	0	0
WBGene00001598	glh-1	0	0	0	0	0	0	0	0	0	0
WBGene00001599	glh-2	0	0	0	0	0	0	0	0	0	0
WBGene00001600	glh-3	0	0	0	0	0	0	0	0	0	0
WBGene00001601	glh-4	0	0	0	0	0	0	0	0	0	0
WBGene00001602	gln-1	0	0	0	0	0	0	0	0	0	0
WBGene00001603	gln-2	0	0	0	0	0	0	0	0	0	6
WBGene00001604	gln-3	0	0	0	0	2	2	0	0	1	3
WBGene00001605	gln-4	0	0	0	0	0	0	0	0	0	0
WBGene00001606	gln-5	0	0	0	0	0	0	0	0	0	0
WBGene00001607	gln-6	0	0	0	0	0	0	0	0	0	0
WBGene00001608	R07B1.8	0	0	0	0	0	0	0	0	0	0
WBGene00001609	glp-1	0	0	0	0	0	0	0	0	0	0
WBGene00001612	glr-1	0	0	0	0	0	0	0	0	0	0
WBGene00001613	glr-2	0	0	0	0	0	0	0	0	0	0
WBGene00001614	glr-3	0	0	0	0	0	0	0	0	0	0
WBGene00001615	glr-4	0	0	0	0	0	0	0	0	0	0
WBGene00001616	glr-5	0	0	0	0	0	0	0	0	0	0
WBGene00001617	glr-6	0	0	0	0	0	0	0	1	0	0
WBGene00001619	glr-8	0	0	0	0	0	0	0	0	0	0
WBGene00001620	glt-1	0	0	0	0	0	0	0	0	0	4
WBGene00001621	glt-3	0	0	0	0	0	0	0	0	0	0
WBGene00001622	glt-4	0	0	0	0	0	0	0	0	0	4
WBGene00001623	glt-5	0	0	0	0	0	0	0	0	0	0
WBGene00001624	glt-6	0	0	0	0	0	0	0	0	0	0
WBGene00001625	glt-7	0	0	0	0	0	0	0	0	0	0
WBGene00001627	gly-2	0	0	0	0	0	0	0	0	0	0
WBGene00001628	gly-3	0	0	0	0	0	0	5	0	1	0
WBGene00001629	gly-4	0	0	0	0	0	0	0	0	0	6
WBGene00001630	gly-5	0	0	0	0	0	0	0	0	2	0
WBGene00001631	gly-6	0	0	0	0	0	0	0	0	0	3
WBGene00001632	gly-7	0	0	0	0	0	0	0	0	0	1
WBGene00001633	gly-8	0	0	0	0	0	0	0	0	0	0
WBGene00001635	gly-10	0	0	0	0	0	0	0	0	0	0
WBGene00001636	gly-11	0	0	0	0	0	0	0	0	0	1
WBGene00001637	gly-12	0	0	0	0	0	0	0	0	0	0
WBGene00001638	gly-13	0	0	0	0	0	0	0	0	0	0
WBGene00001639	gly-14	0	0	0	0	0	0	0	0	0	0
WBGene00001640	gly-15	0	0	0	0	0	0	0	0	0	0
WBGene00001643	gly-18	0	0	0	0	0	0	0	0	0	0
WBGene00001644	gly-19	0	0	0	0	0	0	0	0	0	0
WBGene00001645	gly-20	0	0	0	0	0	0	0	0	0	0
WBGene00001646	gna-1	0	0	0	0	0	0	0	0	0	0
WBGene00001647	gna-2	0	0	0	0	0	0	0	0	0	0
WBGene00001648	goa-1	5	3	0	0	0	0	18	0	3	21
WBGene00001649	gob-1	0	0	0	0	4	0	0	0	0	6
WBGene00001650	gon-1	0	0	0	0	0	0	1	3	0	16
WBGene00001651	gon-2	0	0	0	0	1	0	0	0	0	16
WBGene00001653	gon-4	0	0	0	0	0	0	0	0	0	0
WBGene00001660	gop-1	0	0	0	0	0	0	0	0	0	0
WBGene00001661	gop-2	0	0	0	0	0	0	0	0	0	2
WBGene00001662	gop-3	0	0	0	0	0	0	0	0	0	0
WBGene00001663	gpa-1	0	0	0	0	0	0	0	0	0	0
WBGene00001664	gpa-2	0	0	0	0	0	0	0	0	0	0
WBGene00001665	gpa-3	0	0	0	0	0	0	0	0	0	0
WBGene00001666	gpa-4	0	0	0	0	0	0	0	0	0	0
WBGene00001667	gpa-5	0	0	0	0	0	0	0	0	0	0
WBGene00001669	gpa-7	0	0	0	0	0	0	0	0	0	0
WBGene00001671	gpa-9	0	0	0	0	0	0	0	0	0	0
WBGene00001672	gpa-10	0	0	0	0	0	0	0	0	0	0
WBGene00001673	gpa-11	0	0	0	0	0	0	0	0	3	0
WBGene00001674	gpa-12	0	0	0	0	0	0	0	0	0	0
WBGene00001676	gpa-14	0	0	0	0	0	0	0	0	0	0
WBGene00001677	gpa-15	0	0	0	0	0	0	0	0	0	0
WBGene00001678	gpa-16	0	0	0	0	0	0	0	0	0	0
WBGene00001679	gpb-1	0	3	0	0	6	0	5	0	0	30
WBGene00001680	gpb-2	1	0	0	0	0	0	0	0	6	1
WBGene00001681	gpc-1	0	0	0	0	0	0	0	0	0	0
WBGene00001682	gpc-2	0	0	0	0	6	0	0	0	0	2
WBGene00001683	gpd-1	0	0	0	0	0	0	0	0	0	0
WBGene00001684	gpd-2	3	0	0	0	8	0	0	0	7	14
WBGene00001685	gpd-3	0	0	0	0	0	0	0	0	0	23
WBGene00001686	gpd-4	0	0	0	0	0	0	0	0	0	0
WBGene00001687	gpn-1	0	0	0	0	0	0	0	0	0	0
WBGene00001688	gpr-1	0	0	0	0	0	0	0	0	0	0
WBGene00001689	gpr-2	0	0	0	0	0	0	0	0	0	0
WBGene00001690	grd-1	0	0	0	0	0	0	0	0	0	0
WBGene00001692	grd-3	0	0	0	0	0	0	0	0	0	0
WBGene00001693	grd-4	0	0	0	0	0	0	0	0	0	0
WBGene00001694	grd-5	0	0	0	0	0	0	0	0	0	0
WBGene00001695	grd-6	0	0	0	0	0	0	0	0	0	0
WBGene00001696	grd-7	0	0	0	0	0	0	0	0	0	0
WBGene00001699	grd-10	0	0	0	0	0	0	0	0	0	0
WBGene00001702	grd-13	0	0	0	0	0	0	0	0	0	0
WBGene00001703	grd-14	0	0	0	0	0	0	0	0	0	0
WBGene00001704	grd-15	0	0	0	0	0	0	0	0	0	0
WBGene00001705	grd-16	0	0	0	0	0	0	0	0	0	0
WBGene00001706	grd-17	0	0	0	0	0	0	0	0	0	0
WBGene00001707	grh-1	0	0	0	0	0	0	0	6	1	0
WBGene00001708	grk-1	0	0	0	1	0	0	1	0	0	0
WBGene00001709	grk-2	0	0	0	0	0	0	0	0	0	0
WBGene00001710	grl-1	0	0	0	0	0	0	0	0	0	0
WBGene00001711	grl-2	0	0	0	0	0	0	0	0	0	0
WBGene00001712	grl-3	0	0	0	0	0	0	0	0	0	0
WBGene00001713	grl-4	0	0	0	0	0	0	0	0	0	3
WBGene00001714	grl-5	0	0	0	0	0	0	0	0	0	0
WBGene00001716	grl-7	0	0	0	0	0	0	0	0	0	0
WBGene00001717	grl-8	0	0	0	0	0	0	0	0	0	0
WBGene00001718	grl-9	0	0	0	0	0	0	0	0	0	0
WBGene00001719	grl-10	0	0	0	0	0	0	0	0	0	0
WBGene00001720	grl-11	0	0	0	0	0	0	0	0	0	0
WBGene00001721	grl-12	0	0	0	0	0	0	0	0	0	0
WBGene00001723	grl-14	0	0	0	0	0	0	0	0	0	0
WBGene00001724	grl-15	0	0	0	0	0	0	0	0	0	0
WBGene00001725	grl-16	0	0	0	0	0	0	0	0	0	0
WBGene00001727	grl-18	0	0	0	0	0	0	0	0	0	0
WBGene00001728	grl-19	0	0	0	0	0	0	0	0	0	0
WBGene00001730	grl-21	0	0	0	0	0	0	0	0	0	2
WBGene00001732	grl-23	0	0	0	0	0	0	0	0	0	0
WBGene00001735	grl-26	0	0	0	0	0	0	0	0	0	0
WBGene00001740	gro-1	0	0	0	0	0	0	0	0	0	0
WBGene00001743	grp-1	0	0	0	0	0	0	0	0	2	5
WBGene00001744	gars-1	0	0	0	0	0	0	0	0	4	0
WBGene00001745	gsa-1	0	0	0	0	0	0	0	0	0	8
WBGene00001746	gsk-3	0	3	0	0	5	0	0	0	1	6
WBGene00001747	gsp-1	6	0	0	0	0	0	0	0	0	13
WBGene00001748	gsp-2	0	0	0	0	0	0	0	0	2	0
WBGene00001749	gst-1	0	0	0	0	0	0	6	0	0	12
WBGene00001750	gst-2	0	0	0	0	0	0	0	0	0	0
WBGene00001751	gst-3	0	0	0	0	0	0	0	0	0	0
WBGene00001752	gst-4	0	0	0	0	0	0	0	0	0	0
WBGene00001753	gst-5	0	0	0	0	0	0	0	0	0	0
WBGene00001754	gst-6	0	0	0	0	0	0	0	0	0	0
WBGene00001755	gst-7	0	3	0	0	2	0	2	0	0	4
WBGene00001757	gst-9	0	0	0	0	0	0	0	0	0	0
WBGene00001758	gst-10	0	0	0	0	0	0	0	0	1	4
WBGene00001759	gst-11	0	0	0	0	0	0	0	0	0	0
WBGene00001760	gst-12	0	0	0	0	0	0	0	0	0	0
WBGene00001762	gst-14	0	0	0	0	0	0	0	0	0	0
WBGene00001763	gst-15	0	0	0	0	0	0	0	0	0	0
WBGene00001767	gst-19	0	0	0	0	0	0	0	0	0	0
WBGene00001768	gst-20	0	0	0	0	0	0	15	0	0	0
WBGene00001769	gst-21	0	0	0	0	0	0	0	0	0	0
WBGene00001770	gst-22	0	4	0	0	0	0	0	0	0	2
WBGene00001771	gst-23	0	0	0	0	0	0	0	0	0	0
WBGene00001772	gst-24	0	0	0	0	0	0	0	0	0	0
WBGene00001775	gst-27	0	0	0	0	0	0	0	0	3	0
WBGene00001777	gst-29	0	0	0	0	0	0	0	0	0	0
WBGene00001778	gst-30	0	0	0	0	0	0	0	0	0	0
WBGene00001779	gst-31	0	0	0	0	0	0	0	0	0	0
WBGene00001781	gst-33	0	0	0	0	0	0	0	0	0	0
WBGene00001783	gst-35	0	0	0	0	0	0	0	0	0	0
WBGene00001784	gst-36	0	0	0	0	0	0	0	0	3	0
WBGene00001787	gst-39	0	0	0	0	0	0	0	0	0	0
WBGene00001788	gst-40	0	0	0	0	0	0	0	0	0	3
WBGene00001789	gst-41	0	0	0	0	0	0	0	0	0	0
WBGene00001790	gst-42	0	0	0	0	0	0	0	0	0	0
WBGene00001791	gst-43	0	0	0	0	0	0	0	0	0	0
WBGene00001792	gst-44	0	0	0	0	0	0	0	0	0	0
WBGene00001793	gsy-1	0	0	0	0	0	0	0	0	5	0
WBGene00001794	gta-1	0	0	0	0	0	0	0	0	0	0
WBGene00001795	gtl-1	0	0	0	0	0	0	0	0	0	6
WBGene00001796	gtl-2	0	0	0	0	0	0	0	0	0	0
WBGene00001803	lite-1	0	0	0	0	0	0	0	3	0	0
WBGene00001804	gur-3	0	0	0	0	0	0	0	0	0	0
WBGene00001805	gur-4	0	0	0	0	0	0	0	0	0	0
WBGene00001808	gut-2	0	0	0	0	0	0	0	0	0	0
WBGene00001811	haf-1	0	0	0	0	0	0	0	0	0	0
WBGene00001812	haf-2	0	0	0	0	0	0	0	1	2	0
WBGene00001813	haf-3	0	0	0	0	0	0	0	0	0	0
WBGene00001814	haf-4	0	0	0	0	0	2	0	0	0	3
WBGene00001815	hmt-1	0	0	0	0	5	0	0	0	1	2
WBGene00001816	haf-6	0	0	0	0	0	0	0	0	0	0
WBGene00001817	haf-7	0	0	0	0	0	0	0	0	0	0
WBGene00001819	haf-9	0	0	0	0	0	0	0	0	5	11
WBGene00001820	ham-1	0	0	0	0	0	0	0	0	0	0
WBGene00001821	ham-2	0	0	0	0	0	0	0	0	0	0
WBGene00001823	hap-1	0	0	0	0	0	0	0	0	0	0
WBGene00001824	hbl-1	0	0	0	0	0	0	0	0	0	1
WBGene00001827	hcf-1	0	5	0	0	0	0	4	0	5	0
WBGene00001828	hch-1	0	0	0	0	0	0	0	0	0	0
WBGene00001829	hcp-1	0	0	0	0	0	0	0	0	0	0
WBGene00001830	hcp-2	0	0	0	0	0	0	0	0	0	0
WBGene00001831	hcp-3	0	0	0	0	0	0	0	0	0	0
WBGene00001832	hcp-4	0	0	0	0	0	0	0	0	5	0
WBGene00001833	hcp-6	0	0	0	0	0	3	0	0	0	0
WBGene00001834	hda-1	1	0	0	0	0	0	0	1	2	0
WBGene00001835	hda-2	0	0	0	0	0	0	0	0	0	0
WBGene00001836	hda-3	0	0	0	0	0	0	0	0	0	0
WBGene00001837	hda-4	0	1	0	0	0	0	3	1	0	7
WBGene00001838	hda-10	0	0	0	0	0	0	0	0	0	0
WBGene00001839	hdl-1	0	0	0	0	0	0	0	0	0	0
WBGene00001840	hel-1	0	2	0	0	0	0	0	0	0	4
WBGene00001841	hen-1	0	0	0	0	0	0	0	0	0	0
WBGene00001843	hgo-1	0	0	0	0	0	7	0	0	6	0
WBGene00001844	hid-1	0	0	0	0	0	0	0	0	0	0
WBGene00001851	hif-1	0	3	2	0	0	0	0	0	7	11
WBGene00001852	hil-1	0	0	0	0	0	0	0	0	0	0
WBGene00001853	hil-2	0	0	0	0	0	0	0	0	0	0
WBGene00001854	hil-3	0	0	0	0	0	0	0	0	0	0
WBGene00001855	hil-4	0	0	0	0	0	0	0	0	0	0
WBGene00001856	hil-5	1	0	0	0	0	0	0	0	0	0
WBGene00001857	hil-6	0	0	0	0	0	0	0	0	0	0
WBGene00001858	hil-7	0	0	0	0	0	0	0	0	0	0
WBGene00001860	him-1	0	0	0	0	0	0	0	0	0	0
WBGene00001862	him-3	0	0	0	0	0	0	0	0	0	0
WBGene00001863	him-4	3	0	0	0	0	0	0	0	4	101
WBGene00001864	him-5	0	0	0	0	0	0	0	0	0	0
WBGene00001865	him-6	0	0	0	0	0	0	0	0	0	0
WBGene00001867	him-8	0	0	0	0	0	0	0	0	0	0
WBGene00001869	him-10	0	0	0	0	0	0	0	0	0	0
WBGene00001872	him-14	0	0	0	0	0	0	0	0	0	0
WBGene00001874	him-17	0	0	0	0	0	0	0	0	0	0
WBGene00001875	his-1	0	0	0	0	0	0	0	0	0	0
WBGene00001876	his-2	0	0	0	0	0	0	0	0	0	0
WBGene00001877	his-3	0	0	0	0	0	0	0	0	0	0
WBGene00001878	his-4	0	0	0	0	0	0	0	0	0	0
WBGene00001879	his-5	0	0	0	0	1	0	0	0	0	0
WBGene00001880	his-6	0	0	0	0	0	0	0	0	0	0
WBGene00001881	his-7	0	0	0	0	0	0	0	0	0	0
WBGene00001882	his-8	0	0	0	0	0	0	0	0	0	0
WBGene00001883	his-9	0	0	0	0	0	0	0	0	0	0
WBGene00001884	his-10	0	0	0	0	0	0	0	0	0	0
WBGene00001885	his-11	0	0	0	0	0	0	0	0	0	0
WBGene00001886	his-12	0	0	0	0	0	0	0	0	0	0
WBGene00001887	his-13	0	0	0	0	0	0	0	0	0	0
WBGene00001888	his-14	0	0	0	0	0	0	0	0	0	0
WBGene00001889	his-15	0	0	0	0	0	0	0	0	0	0
WBGene00001890	his-16	0	0	0	0	0	0	0	0	0	0
WBGene00001891	his-17	0	0	0	0	0	0	0	0	0	0
WBGene00001892	his-18	0	0	0	0	1	0	0	0	0	0
WBGene00001893	his-19	0	0	0	0	0	0	0	0	0	0
WBGene00001895	his-21	0	0	0	0	0	0	0	0	0	0
WBGene00001896	his-22	0	0	0	0	0	0	0	0	0	0
WBGene00001898	his-24	0	0	0	0	0	0	0	0	0	0
WBGene00001899	his-25	0	0	0	0	0	0	0	0	0	0
WBGene00001900	his-26	0	0	0	0	0	0	0	0	0	0
WBGene00001901	his-27	0	0	0	0	0	0	0	0	0	0
WBGene00001902	his-28	0	0	0	0	0	0	0	0	0	0
WBGene00001903	his-29	0	0	0	0	0	0	0	0	0	0
WBGene00001904	his-30	0	0	0	0	0	0	0	0	0	0
WBGene00001905	his-31	0	0	0	0	0	0	0	0	0	0
WBGene00001906	his-32	0	0	0	0	0	0	0	0	0	0
WBGene00001907	his-33	0	0	0	0	0	0	0	0	0	0
WBGene00001909	his-35	0	0	0	0	0	0	0	0	2	3
WBGene00001910	C50F4.6	0	0	0	0	0	0	0	0	0	0
WBGene00001911	his-37	0	4	0	0	0	0	0	0	0	1
WBGene00001912	his-38	0	0	0	0	0	0	0	0	0	0
WBGene00001914	his-40	0	0	0	0	0	0	0	0	0	0
WBGene00001915	his-41	0	0	0	0	0	0	0	0	3	1
WBGene00001916	his-42	0	0	0	0	0	0	0	0	0	0
WBGene00001917	his-43	0	0	0	0	0	0	0	0	0	0
WBGene00001918	his-44	0	0	0	0	0	0	0	0	0	0
WBGene00001919	his-45	0	0	0	0	0	0	0	0	0	0
WBGene00001920	his-46	0	0	0	0	0	0	0	0	0	0
WBGene00001921	his-47	0	0	0	0	0	0	0	0	0	0
WBGene00001922	his-48	0	0	0	0	0	1	0	0	0	1
WBGene00001923	his-49	0	0	0	0	0	0	0	0	0	0
WBGene00001924	his-50	0	0	0	0	0	0	0	0	0	0
WBGene00001925	his-51	0	0	0	0	0	0	0	0	0	0
WBGene00001929	his-55	0	0	0	0	0	0	0	0	0	0
WBGene00001930	his-56	0	0	0	0	0	0	0	0	3	0
WBGene00001931	his-57	0	0	0	0	0	0	0	0	0	0
WBGene00001932	his-58	0	0	0	0	0	0	0	0	0	3
WBGene00001933	his-59	0	0	0	0	0	0	0	0	0	0
WBGene00001934	his-60	0	0	0	0	0	0	0	0	0	0
WBGene00001935	his-61	0	0	0	0	0	0	0	0	0	0
WBGene00001936	his-62	0	0	0	0	0	0	0	0	0	0
WBGene00001937	his-63	0	0	0	0	0	0	0	0	0	0
WBGene00001938	his-64	0	0	0	0	0	0	0	0	0	0
WBGene00001939	his-65	0	0	0	0	0	0	0	0	0	0
WBGene00001940	his-66	0	0	0	0	0	0	0	0	0	0
WBGene00001941	his-67	0	0	0	0	0	0	0	0	0	0
WBGene00001942	his-68	0	0	0	0	0	0	0	0	0	0
WBGene00001944	his-70	0	0	0	0	0	0	0	0	0	0
WBGene00001945	his-71	0	0	0	0	0	0	0	0	0	0
WBGene00001946	his-72	0	0	0	0	0	0	0	0	0	0
WBGene00001947	his-73	0	0	0	0	0	0	0	0	0	0
WBGene00001948	hlh-1	0	0	0	0	0	0	0	0	0	0
WBGene00001949	hlh-2	0	0	0	0	0	0	0	0	0	0
WBGene00001950	hlh-3	0	0	0	0	0	0	0	0	0	0
WBGene00001951	hlh-4	0	0	0	0	0	0	0	0	0	0
WBGene00001952	hlh-6	0	0	0	0	0	0	0	0	0	0
WBGene00001953	hlh-8	0	0	0	0	0	0	0	0	0	1
WBGene00001954	hlh-10	0	0	0	0	0	0	0	0	0	0
WBGene00001955	hlh-11	0	0	0	0	0	0	2	0	1	9
WBGene00001957	hlh-13	0	0	0	0	0	0	0	0	0	0
WBGene00001960	hlh-16	0	0	0	0	0	0	0	0	0	0
WBGene00001963	btb-1	0	0	0	0	0	0	0	0	0	0
WBGene00001971	hmg-1.1	2	0	0	0	0	0	0	0	7	8
WBGene00001972	hmg-1.2	0	0	0	0	0	0	0	0	0	6
WBGene00001973	hmg-3	0	0	0	0	0	0	0	0	0	0
WBGene00001974	hmg-4	0	0	0	0	0	0	0	0	6	11
WBGene00001975	hmg-5	0	0	0	0	0	0	0	0	0	0
WBGene00001976	hmg-11	0	0	0	0	0	0	0	0	0	0
WBGene00001977	hmg-12	0	0	0	0	0	0	0	0	4	0
WBGene00001978	hmp-1	1	5	0	0	0	0	0	0	3	7
WBGene00001979	hmp-2	0	0	0	0	0	0	0	0	0	0
WBGene00001980	hmr-1	2	0	0	0	2	0	9	0	2	6
WBGene00001983	hoe-1	0	0	0	0	0	1	0	0	0	1
WBGene00001984	hog-1	0	0	0	0	0	0	0	0	0	0
WBGene00001985	hop-1	0	0	0	0	0	0	0	0	0	0
WBGene00001986	hot-1	0	0	0	0	0	0	0	0	0	0
WBGene00001987	hot-2	0	0	0	0	0	0	0	0	0	1
WBGene00001988	hot-3	0	0	0	0	0	0	0	0	0	0
WBGene00001989	hot-4	0	0	0	0	0	0	0	0	0	0
WBGene00001990	hot-5	0	0	0	0	0	0	0	0	0	1
WBGene00001991	hot-6	0	0	0	0	0	0	0	0	0	0
WBGene00001993	hpd-1	0	0	0	0	0	0	0	0	4	0
WBGene00001994	hpk-1	2	0	0	0	0	0	3	0	4	17
WBGene00001995	hpl-1	0	0	0	0	0	0	0	0	0	0
WBGene00001996	hpl-2	0	0	0	0	0	0	0	0	0	1
WBGene00001997	hpr-9	0	4	0	0	0	0	0	0	0	0
WBGene00001998	hpr-17	0	0	0	0	0	0	0	0	0	0
WBGene00001999	hrp-1	0	0	0	0	0	0	5	0	0	2
WBGene00002000	hrp-2	0	0	0	0	0	0	4	0	7	2
WBGene00002001	hars-1	0	0	0	0	0	0	0	0	0	4
WBGene00002002	hsb-1	0	0	0	0	0	0	0	0	0	0
WBGene00002003	hse-5	0	0	0	0	0	0	0	0	0	0
WBGene00002004	hsf-1	0	4	0	0	0	0	0	0	1	0
WBGene00002005	hsp-1	1	3	0	0	4	5	15	1	8	20
WBGene00002007	hsp-3	0	10	0	0	4	8	4	0	24	29
WBGene00002008	hsp-4	2	0	0	0	0	0	0	2	10	11
WBGene00002010	hsp-6	0	2	0	0	0	0	4	0	0	4
WBGene00002011	hsp-12.2	0	0	0	0	0	0	0	0	0	0
WBGene00002012	hsp-12.3	0	0	0	0	0	0	0	0	0	6
WBGene00002013	hsp-12.6	0	0	0	0	0	0	0	0	0	0
WBGene00002015	hsp-16.1	10	0	0	0	1	0	0	14	24	25
WBGene00002016	hsp-16.2	0	2	0	0	0	0	4	3	0	4
WBGene00002017	hsp-16.11	0	0	0	0	2	0	0	3	4	0
WBGene00002018	hsp-16.41	0	0	0	0	0	0	0	0	0	16
WBGene00002019	hsp-16.48	3	0	0	0	2	0	0	0	19	20
WBGene00002020	hsp-16.49	4	10	0	0	5	0	2	3	21	37
WBGene00002021	hsp-17	0	0	0	0	0	0	0	0	0	0
WBGene00002023	hsp-25	3	5	0	0	0	0	0	1	0	3
WBGene00002024	hsp-43	0	0	0	0	0	0	6	2	0	1
WBGene00002025	hsp-60	3	0	0	0	1	0	0	5	1	2
WBGene00002026	hsp-70	1	0	0	0	7	0	0	11	1	32
WBGene00002027	hsr-9	0	0	0	0	0	0	0	0	0	4
WBGene00002028	hst-1	0	0	0	0	0	0	0	0	0	0
WBGene00002029	hst-2	0	0	0	0	0	0	0	0	0	0
WBGene00002030	hst-3.1	3	0	0	0	0	0	0	0	0	0
WBGene00002031	hst-6	0	0	0	0	0	0	0	0	0	0
WBGene00002032	htp-1	0	0	0	0	0	0	0	0	0	0
WBGene00002033	htp-2	0	0	0	0	0	0	0	0	0	0
WBGene00002034	htp-3	0	0	0	0	0	0	0	0	0	0
WBGene00002035	hum-1	0	0	0	0	0	0	12	0	1	0
WBGene00002036	hum-2	0	0	0	0	0	0	1	0	0	1
WBGene00002037	hum-4	0	0	0	0	0	0	0	1	0	10
WBGene00002038	hum-5	0	0	0	0	0	1	10	8	0	13
WBGene00002039	hum-6	0	0	0	0	0	8	0	0	3	13
WBGene00002040	hum-7	0	0	0	0	0	0	0	0	0	0
WBGene00002041	hum-8	0	0	0	0	3	0	0	0	0	2
WBGene00002042	hus-1	0	0	0	0	0	0	0	0	0	0
WBGene00002043	hyl-1	0	1	0	0	0	0	0	0	0	2
WBGene00002044	hyl-2	0	0	0	0	0	0	0	0	7	0
WBGene00002045	icd-1	4	6	0	0	1	4	5	0	9	12
WBGene00002046	icln-1	0	0	0	0	0	0	0	0	0	0
WBGene00002047	icp-1	0	0	0	0	0	0	0	0	0	0
WBGene00002048	ida-1	5	0	0	0	0	0	0	0	2	1
WBGene00002050	ifa-1	0	0	0	0	0	0	0	4	0	9
WBGene00002051	ifa-3	0	0	0	0	0	0	0	0	0	0
WBGene00002052	ifa-4	0	19	0	0	0	0	5	5	0	3
WBGene00002053	ifb-1	7	6	0	0	0	0	6	7	1	29
WBGene00002054	ifb-2	2	6	2	1	0	0	4	3	4	9
WBGene00002055	ifc-1	0	0	0	0	0	0	0	0	6	2
WBGene00002056	ifc-2	0	46	0	0	1	0	10	0	0	13
WBGene00002057	ifd-1	0	0	0	0	0	0	0	0	0	1
WBGene00002058	ifd-2	0	0	0	0	0	0	0	0	0	3
WBGene00002059	ife-1	4	0	0	0	0	0	0	0	0	0
WBGene00002060	ife-2	0	0	0	0	0	0	0	0	0	0
WBGene00002061	ife-3	0	0	0	0	0	0	0	0	0	0
WBGene00002062	ife-4	0	0	0	0	0	0	0	0	0	0
WBGene00002063	ife-5	0	0	0	0	0	0	0	0	0	0
WBGene00002064	iff-1	0	0	0	0	0	0	0	0	0	0
WBGene00002065	iff-2	1	0	0	0	0	0	0	5	1	18
WBGene00002066	ifg-1	0	1	0	0	0	0	8	0	2	17
WBGene00002067	ifp-1	0	0	0	0	1	0	0	3	1	2
WBGene00002068	ify-1	0	0	0	0	0	0	0	0	0	2
WBGene00002069	ikb-1	0	0	0	0	0	0	0	0	0	2
WBGene00002070	ile-1	0	0	0	0	0	0	0	5	0	0
WBGene00002071	ile-2	0	0	0	0	0	0	0	0	0	1
WBGene00002072	ima-1	0	0	0	0	0	0	0	0	0	0
WBGene00002073	ima-2	0	0	0	0	0	0	0	0	0	0
WBGene00002074	ima-3	0	0	0	0	3	0	2	0	4	5
WBGene00002075	imb-1	0	6	0	0	0	0	0	0	2	4
WBGene00002076	imb-2	0	0	0	0	0	0	0	0	4	0
WBGene00002077	imb-3	0	0	0	0	0	0	7	0	3	3
WBGene00002078	xpo-1	0	0	0	0	0	0	1	0	8	4
WBGene00002079	xpo-2	4	0	0	0	0	1	0	0	0	0
WBGene00002080	xpo-3	0	0	0	0	0	0	0	0	0	1
WBGene00002081	ina-1	0	0	0	0	1	0	0	0	0	1
WBGene00002083	inf-1	0	0	0	0	0	6	0	0	0	8
WBGene00002084	ins-1	0	0	0	0	0	0	0	0	0	0
WBGene00002086	ins-3	0	0	0	0	0	0	0	0	0	0
WBGene00002087	ins-4	0	0	0	0	0	0	0	0	0	0
WBGene00002089	ins-6	0	0	0	0	0	0	0	0	0	0
WBGene00002093	ins-10	0	0	0	0	0	0	0	0	0	0
WBGene00002094	ins-11	0	0	0	0	0	0	0	0	0	0
WBGene00002096	ins-13	0	0	0	0	0	0	0	0	0	0
WBGene00002097	ins-14	0	0	0	0	0	0	0	0	0	0
WBGene00002098	ins-15	0	0	0	0	0	0	0	0	0	0
WBGene00002099	ins-16	0	0	0	0	0	0	0	0	0	0
WBGene00002100	ins-17	0	0	0	0	0	0	0	0	0	0
WBGene00002101	ins-18	0	0	0	0	0	0	0	0	0	0
WBGene00002107	ins-24	0	0	0	0	0	0	0	0	0	0
WBGene00002108	ins-25	0	0	0	0	0	0	0	0	0	0
WBGene00002109	ins-26	0	0	0	0	0	0	0	0	0	0
WBGene00002110	ins-27	0	0	2	0	0	0	0	0	0	0
WBGene00002111	ins-28	0	0	0	0	0	0	0	0	0	0
WBGene00002112	ins-29	0	0	0	0	0	0	0	0	0	0
WBGene00002113	ins-30	0	0	0	0	0	0	0	0	0	0
WBGene00002116	ins-33	0	0	0	0	0	0	0	0	0	0
WBGene00002118	ins-35	0	0	0	0	0	0	0	2	0	0
WBGene00002119	ins-36	0	0	0	0	0	0	0	0	0	0
WBGene00002120	ins-37	0	0	0	0	0	0	0	0	0	0
WBGene00002123	inx-1	0	0	0	0	0	0	0	0	0	3
WBGene00002124	inx-2	0	0	0	0	0	0	0	0	0	0
WBGene00002125	inx-3	0	0	0	0	0	0	0	0	0	0
WBGene00002127	inx-5	0	0	0	0	0	0	0	0	0	0
WBGene00002128	inx-6	0	0	0	0	0	0	0	0	0	0
WBGene00002129	inx-7	0	0	0	0	0	0	0	1	0	0
WBGene00002130	inx-8	0	0	0	0	0	0	0	0	0	0
WBGene00002131	inx-9	0	0	0	0	0	0	0	0	0	0
WBGene00002132	inx-10	0	0	0	0	0	0	0	3	1	0
WBGene00002133	inx-11	0	0	0	0	0	0	0	0	1	0
WBGene00002134	inx-12	0	0	0	0	0	0	0	1	0	4
WBGene00002135	inx-13	0	0	0	0	0	0	0	0	0	6
WBGene00002136	inx-14	0	0	0	0	0	0	0	0	5	0
WBGene00002137	inx-15	0	0	0	0	0	0	0	0	0	1
WBGene00002138	inx-16	0	0	0	0	0	0	0	0	0	0
WBGene00002139	inx-17	0	0	0	0	0	0	0	0	0	3
WBGene00002140	inx-18	0	0	0	0	0	0	0	0	0	0
WBGene00002141	inx-19	0	0	0	0	0	0	0	0	0	0
WBGene00002142	inx-20	0	4	0	0	0	0	4	0	0	0
WBGene00002143	inx-21	0	0	0	0	0	0	0	0	0	0
WBGene00002144	inx-22	0	0	0	0	0	0	0	0	0	0
WBGene00002146	ipp-5	0	0	0	0	0	0	0	0	0	1
WBGene00002147	ire-1	0	0	0	0	0	0	0	3	0	3
WBGene00002148	gon-14	0	0	0	0	0	0	0	0	0	1
WBGene00002149	irk-1	0	0	0	0	0	0	0	0	0	0
WBGene00002150	irk-2	0	0	0	0	0	0	0	0	0	0
WBGene00002151	irk-3	0	0	0	0	0	0	0	0	0	0
WBGene00002152	iars-1	3	3	0	0	0	0	4	0	4	8
WBGene00002153	iars-2	0	0	0	0	0	0	4	0	0	6
WBGene00002162	isp-1	0	0	0	0	1	0	2	0	0	10
WBGene00002163	ist-1	0	0	0	0	0	0	0	0	0	4
WBGene00002169	isw-1	0	0	0	0	0	0	0	0	0	0
WBGene00002173	itr-1	1	0	0	0	0	0	0	0	1	41
WBGene00002174	itx-1	0	21	0	0	2	1	17	5	0	5
WBGene00002175	jac-1	0	0	6	0	0	0	0	0	0	15
WBGene00002176	jip-1	0	0	0	0	0	0	0	0	0	1
WBGene00002177	jkk-1	0	0	0	0	0	0	0	0	0	1
WBGene00002178	jnk-1	0	0	0	0	0	0	0	0	0	0
WBGene00002179	jph-1	0	0	0	0	0	0	0	0	0	2
WBGene00002180	jtr-1	0	0	0	0	0	0	0	0	0	0
WBGene00002181	kal-1	0	0	0	0	0	0	0	0	10	0
WBGene00002182	kap-1	0	0	0	0	0	0	0	0	0	0
WBGene00002183	kat-1	0	0	0	0	0	0	0	0	0	1
WBGene00002184	kel-1	0	0	0	0	0	0	0	0	0	0
WBGene00002185	kel-3	0	0	0	0	0	0	0	0	1	5
WBGene00002186	kel-10	0	0	0	0	0	0	0	0	0	0
WBGene00002187	kgb-1	0	0	0	0	2	0	0	1	0	1
WBGene00002189	kin-1	0	10	0	0	0	2	0	2	4	21
WBGene00002190	kin-2	0	4	0	0	0	5	0	0	8	6
WBGene00002191	kin-3	0	0	0	0	0	0	0	0	0	9
WBGene00002192	kin-4	0	0	0	0	0	0	0	0	0	0
WBGene00002193	kin-5	0	0	0	0	0	0	0	0	0	0
WBGene00002194	kin-6	0	0	0	0	0	0	0	0	0	0
WBGene00002195	kin-9	0	0	0	0	0	0	0	0	0	0
WBGene00002196	kin-10	0	0	0	0	0	0	0	1	2	1
WBGene00002198	kin-14	0	0	0	0	0	0	0	0	0	0
WBGene00002199	kin-15	0	0	0	0	0	0	0	0	0	0
WBGene00002200	kin-16	0	0	0	0	0	0	0	0	0	0
WBGene00002201	kin-18	0	0	0	0	1	0	1	0	3	5
WBGene00002202	kin-19	0	2	0	0	0	0	0	0	1	9
WBGene00002203	kin-20	0	1	0	0	0	1	7	0	7	0
WBGene00002204	kin-21	0	0	0	0	0	0	0	0	0	0
WBGene00002205	kin-23	0	0	0	0	0	0	0	0	0	0
WBGene00002206	kin-24	0	0	0	0	0	0	0	0	0	0
WBGene00002207	sid-3	0	0	0	0	0	0	0	0	0	10
WBGene00002208	kin-26	0	0	0	0	0	0	0	0	0	0
WBGene00002210	kin-29	0	0	0	0	0	0	0	4	0	0
WBGene00002211	kin-30	0	0	0	0	0	0	0	0	0	0
WBGene00002212	kin-31	0	0	0	0	0	0	0	0	0	0
WBGene00002213	kin-32	0	0	0	0	0	3	0	0	0	0
WBGene00002214	klc-1	0	0	0	0	0	0	0	0	0	0
WBGene00002215	klc-2	0	0	0	0	0	0	0	0	0	0
WBGene00002216	klp-3	0	8	0	0	0	0	0	0	0	8
WBGene00002217	klp-4	0	0	0	0	0	0	0	0	3	1
WBGene00002218	klp-6	0	0	0	0	0	0	0	0	0	0
WBGene00002219	klp-7	0	0	0	0	0	0	0	0	0	0
WBGene00002220	gcc-1	0	0	0	0	0	0	0	0	0	4
WBGene00002221	klp-10	0	0	0	0	0	0	0	0	0	0
WBGene00002222	klp-11	0	0	0	0	0	0	0	0	3	0
WBGene00002223	klp-12	0	1	0	0	4	0	1	0	0	5
WBGene00002224	klp-13	0	0	0	0	0	0	0	0	0	9
WBGene00002225	klp-15	0	0	0	0	0	0	0	0	0	0
WBGene00002226	klp-16	0	0	0	0	0	0	0	0	0	0
WBGene00002227	klp-17	0	0	0	0	0	0	0	0	0	4
WBGene00002228	klp-18	0	0	0	0	0	0	0	0	0	0
WBGene00002229	klp-19	0	0	0	0	0	2	0	0	0	0
WBGene00002230	klp-20	0	0	0	0	0	0	0	0	0	0
WBGene00002231	knl-1	0	0	0	0	0	0	0	0	0	0
WBGene00002232	kpc-1	0	0	0	0	0	0	9	0	3	9
WBGene00002233	kqt-1	0	0	0	0	0	0	0	0	0	0
WBGene00002234	kqt-2	0	0	0	0	3	0	0	0	0	0
WBGene00002235	kqt-3	0	0	0	0	0	0	0	0	0	0
WBGene00002238	kars-1	0	0	0	0	2	0	1	1	0	10
WBGene00002239	ksr-1	0	0	0	0	0	0	0	0	0	0
WBGene00002240	ksr-2	0	0	0	0	0	0	0	0	0	0
WBGene00002241	kup-1	0	0	0	0	0	0	1	0	2	0
WBGene00002242	kvs-1	0	0	0	0	0	0	0	0	0	0
WBGene00002243	lad-2	0	0	0	0	0	0	0	0	0	7
WBGene00002244	laf-1	0	0	0	0	0	0	3	0	0	6
WBGene00002245	lag-1	0	0	0	0	0	0	0	0	0	2
WBGene00002246	lag-2	0	0	0	0	0	0	0	0	0	0
WBGene00002247	lam-1	5	0	0	0	0	0	0	0	9	65
WBGene00002248	lam-3	0	0	0	0	0	0	0	0	0	0
WBGene00002249	lap-1	0	0	0	0	0	0	0	0	0	2
WBGene00002250	lap-2	1	0	0	0	3	0	0	0	0	10
WBGene00002251	lat-1	0	0	0	0	0	0	0	0	0	0
WBGene00002252	lat-2	0	0	0	0	0	0	0	0	0	0
WBGene00002253	lbp-1	3	0	0	0	0	0	0	0	0	0
WBGene00002254	lbp-2	2	0	0	0	0	0	0	0	1	32
WBGene00002255	lbp-3	0	0	0	0	0	0	0	0	0	7
WBGene00002256	lbp-4	0	0	0	0	0	0	0	0	0	0
WBGene00002257	lbp-5	0	0	0	0	0	0	0	0	0	0
WBGene00002258	lbp-6	0	0	0	0	0	0	8	0	4	0
WBGene00002259	lbp-7	0	0	0	0	0	0	0	0	0	0
WBGene00002261	ldb-1	0	0	0	0	0	0	3	0	0	0
WBGene00002262	ldh-1	0	0	0	0	0	0	0	0	0	0
WBGene00002263	lea-1	0	0	0	0	1	0	2	3	3	2
WBGene00002264	lec-1	0	9	0	0	0	0	0	0	5	5
WBGene00002265	lec-2	0	4	0	0	0	0	0	0	0	5
WBGene00002266	lec-3	1	1	0	0	0	0	0	0	0	3
WBGene00002267	lec-4	0	0	0	0	0	0	3	0	0	2
WBGene00002268	lec-5	0	0	0	0	0	0	0	0	0	2
WBGene00002269	lec-6	0	1	0	0	2	0	17	0	0	4
WBGene00002270	lec-7	0	0	0	0	0	0	5	0	0	0
WBGene00002271	lec-8	0	5	0	0	0	0	8	0	0	14
WBGene00002272	lec-9	0	0	0	0	12	0	1	0	5	36
WBGene00002273	lec-10	2	9	0	0	6	0	0	0	6	6
WBGene00002274	lec-11	0	0	0	0	0	0	0	0	0	0
WBGene00002275	lem-2	0	0	0	0	0	0	0	0	0	0
WBGene00002276	lem-3	0	0	0	0	0	0	0	1	0	0
WBGene00002278	lep-2	0	0	0	0	0	0	0	0	0	0
WBGene00002280	let-2	3	0	4	0	0	0	0	3	18	101
WBGene00002282	let-4	0	0	0	0	0	0	0	0	0	0
WBGene00002295	let-19	0	0	0	0	0	1	8	0	5	11
WBGene00002297	ect-2	0	0	0	0	0	0	0	0	0	0
WBGene00002299	let-23	0	0	0	0	0	0	5	0	0	0
WBGene00002324	let-49	0	0	0	0	0	0	0	0	0	0
WBGene00002335	let-60	0	2	0	0	0	0	0	0	2	9
WBGene00002344	let-70	0	0	0	0	0	0	1	0	0	0
WBGene00002348	myo-1	0	0	0	0	0	0	48	0	0	0
WBGene00002363	let-92	0	0	0	0	0	0	4	0	0	5
WBGene00002368	let-99	0	0	0	0	0	0	0	0	0	0
WBGene00002393	lpr-1	0	0	0	0	0	0	0	0	2	0
WBGene00002497	let-268	4	0	0	0	0	0	0	0	0	1
WBGene00002583	let-363	0	0	0	0	3	2	0	0	0	6
WBGene00002601	let-381	0	0	0	0	0	0	0	0	0	0
WBGene00002632	let-413	0	0	0	0	2	0	0	5	0	0
WBGene00002637	let-418	0	0	0	0	0	1	2	2	1	5
WBGene00002694	let-502	0	0	4	0	7	0	0	0	0	4
WBGene00002696	let-504	0	0	0	0	0	0	0	0	0	0
WBGene00002717	let-526	9	3	0	0	5	0	4	8	7	5
WBGene00002783	let-607	0	0	0	0	2	1	7	0	28	8
WBGene00002804	let-630	0	0	0	0	0	0	0	0	0	6
WBGene00002827	let-653	0	0	0	0	0	0	0	0	2	0
WBGene00002845	let-711	1	11	0	0	0	3	14	3	3	5
WBGene00002850	let-716	0	0	0	0	0	0	0	0	6	0
WBGene00002855	let-721	0	0	0	0	0	0	0	0	0	2
WBGene00002879	let-754	0	0	0	0	0	0	0	0	0	1
WBGene00002881	let-756	0	0	0	0	0	0	0	0	5	0
WBGene00002889	let-765	0	0	0	0	0	0	4	3	2	0
WBGene00002891	let-767	0	0	0	0	0	0	0	0	0	4
WBGene00002915	let-805	2	0	0	0	0	0	0	6	13	18
WBGene00002957	let-858	0	0	0	0	0	0	0	2	0	0
WBGene00002974	lev-1	0	0	0	0	0	0	0	0	0	0
WBGene00002975	lev-8	0	0	0	0	0	0	0	0	0	0
WBGene00002976	lev-9	0	0	0	0	0	0	0	0	0	0
WBGene00002977	lev-10	0	0	0	0	0	0	0	0	3	2
WBGene00002978	lev-11	6	0	0	0	0	0	0	0	14	95
WBGene00002979	lfe-2	0	0	0	0	0	0	0	0	4	0
WBGene00002980	lgg-1	1	2	0	0	0	0	10	0	0	11
WBGene00002981	lgg-2	0	0	0	0	0	0	5	0	0	1
WBGene00002982	lgg-3	0	0	0	0	0	0	0	0	0	0
WBGene00002983	lgx-1	0	0	0	0	0	0	0	0	0	0
WBGene00002985	lig-1	0	0	0	0	0	0	0	0	0	0
WBGene00002986	lig-4	0	0	0	0	0	0	0	0	0	0
WBGene00002987	lim-4	0	0	0	0	0	0	0	0	0	0
WBGene00002988	lim-6	0	0	0	0	0	0	0	0	0	0
WBGene00002989	lim-7	0	0	0	0	0	0	0	0	0	0
WBGene00002990	lin-1	0	0	0	0	0	0	0	0	2	3
WBGene00002991	lin-2	0	0	0	0	0	0	0	0	0	7
WBGene00002992	lin-3	0	0	0	0	0	0	5	0	0	0
WBGene00002994	lin-5	0	0	0	0	0	0	0	0	0	0
WBGene00002996	lin-7	0	0	0	0	0	0	0	0	0	0
WBGene00002997	lin-8	0	0	0	0	0	0	0	0	0	0
WBGene00002998	lin-9	0	0	0	0	0	0	0	0	0	0
WBGene00002999	lin-10	0	0	0	0	0	0	0	2	0	2
WBGene00003000	lin-11	0	0	0	0	0	0	0	0	0	0
WBGene00003001	lin-12	0	0	0	0	0	0	0	0	0	1
WBGene00003002	lin-13	0	0	0	0	0	0	0	1	0	2
WBGene00003003	lin-14	0	0	0	0	0	0	1	0	3	2
WBGene00003006	lin-17	0	1	0	0	0	0	0	1	0	7
WBGene00003007	lin-18	0	0	0	0	0	0	0	0	0	0
WBGene00003008	lin-22	0	0	0	0	0	0	0	0	0	0
WBGene00003009	lin-23	0	0	0	0	5	1	0	0	0	0
WBGene00003010	lin-24	0	0	0	0	0	0	0	0	0	1
WBGene00003011	lin-25	0	0	0	0	0	0	0	0	0	0
WBGene00003012	lin-26	0	0	0	0	0	0	0	0	0	0
WBGene00003014	lin-28	0	0	0	0	0	0	0	0	0	2
WBGene00003015	lin-29	0	0	0	0	0	0	2	0	7	0
WBGene00003017	lin-31	0	0	0	0	0	0	0	0	0	0
WBGene00003019	lin-33	0	0	0	0	0	0	0	0	0	0
WBGene00003020	lin-35	0	0	1	0	0	0	0	0	1	0
WBGene00003021	lin-36	4	0	0	0	0	0	0	0	3	0
WBGene00003022	lin-37	0	0	0	0	0	0	0	0	0	1
WBGene00003024	lin-39	0	0	0	0	0	0	0	0	0	0
WBGene00003025	lin-40	0	8	0	0	0	0	3	0	0	4
WBGene00003026	lin-41	0	0	0	0	0	0	5	0	3	8
WBGene00003029	lin-44	0	0	0	0	0	0	0	0	0	0
WBGene00003030	lin-45	0	2	0	0	2	0	2	0	0	9
WBGene00003031	lin-46	0	0	0	0	0	0	0	0	0	0
WBGene00003033	lin-48	0	0	0	0	0	0	0	0	0	0
WBGene00003034	lin-49	0	0	0	2	0	0	0	0	3	6
WBGene00003035	lin-52	0	0	0	0	0	0	0	0	0	0
WBGene00003036	lin-53	0	0	0	0	0	0	0	0	0	0
WBGene00003037	lin-54	0	0	0	0	0	0	0	0	0	0
WBGene00003038	lin-56	0	0	0	0	0	0	0	0	0	0
WBGene00003040	lin-59	0	0	0	0	0	2	8	7	1	0
WBGene00003041	lin-61	0	0	0	0	0	0	0	0	0	0
WBGene00003043	lip-1	0	0	0	0	0	0	0	0	1	0
WBGene00003044	lir-1	0	0	0	0	0	0	0	0	0	0
WBGene00003045	lir-2	0	0	0	0	0	0	0	0	0	0
WBGene00003046	lir-3	0	0	0	0	0	0	0	0	0	0
WBGene00003047	lis-1	0	0	0	0	0	0	2	0	2	0
WBGene00003048	lit-1	2	0	0	0	0	0	1	0	1	5
WBGene00003052	lmn-1	0	0	0	0	0	0	2	0	0	0
WBGene00003053	lmp-1	0	0	0	0	0	0	0	0	0	2
WBGene00003055	lon-1	0	0	0	0	0	0	0	0	2	0
WBGene00003056	lon-2	0	0	0	0	0	0	0	0	0	1
WBGene00003057	lon-3	0	0	0	0	0	0	0	0	0	0
WBGene00003058	lov-1	0	0	0	0	0	0	0	0	0	0
WBGene00003059	lpd-2	0	0	0	0	0	0	0	0	0	0
WBGene00003060	lpd-3	0	6	0	0	2	0	2	1	2	11
WBGene00003061	lpd-5	0	0	0	0	0	0	0	0	0	0
WBGene00003062	lpd-6	0	0	0	0	0	2	0	0	2	4
WBGene00003063	lpd-7	0	0	0	0	0	1	0	0	0	3
WBGene00003064	lpd-8	0	0	0	0	0	0	0	0	0	0
WBGene00003065	lpd-9	0	0	0	0	0	0	0	0	0	2
WBGene00003066	lpl-1	0	0	0	0	0	0	0	0	0	0
WBGene00003067	lrg-1	0	0	0	0	0	0	0	0	0	0
WBGene00003068	lrk-1	0	0	0	0	7	0	0	0	0	0
WBGene00003071	lrp-1	4	0	0	0	0	0	0	9	2	2
WBGene00003072	lrp-2	1	0	0	0	0	0	0	5	0	10
WBGene00003073	lars-1	0	0	0	0	0	3	0	0	3	2
WBGene00003074	lars-2	0	0	0	0	0	0	0	0	4	1
WBGene00003075	lrx-1	0	0	0	0	0	0	0	0	0	0
WBGene00003076	lsm-1	0	0	0	0	0	0	0	0	0	0
WBGene00003077	lsm-3	0	0	0	0	0	7	0	0	0	0
WBGene00003078	lsm-4	0	0	0	0	0	0	0	0	0	0
WBGene00003079	lsm-5	3	2	0	0	0	0	0	0	0	0
WBGene00003080	lsm-6	0	0	0	0	0	0	0	0	0	0
WBGene00003081	lsm-7	0	0	0	0	0	0	0	0	0	0
WBGene00003082	lsm-8	0	0	0	0	0	0	0	0	0	0
WBGene00003083	lst-1	0	1	0	0	0	0	0	0	0	11
WBGene00003084	lst-2	0	0	0	0	1	0	0	0	4	2
WBGene00003085	ccar-1	0	0	0	0	0	0	3	0	0	1
WBGene00003086	lst-4	0	0	0	0	0	0	0	0	2	2
WBGene00003087	lsy-2	0	0	0	0	0	0	0	0	0	0
WBGene00003089	ltd-1	0	8	0	0	0	0	0	0	0	0
WBGene00003090	lys-1	0	0	0	0	0	0	0	0	6	0
WBGene00003091	lys-2	0	0	0	0	0	0	0	0	0	0
WBGene00003092	lys-3	0	0	0	0	0	0	0	0	0	0
WBGene00003093	lys-4	0	0	0	0	0	0	0	0	0	0
WBGene00003094	lys-5	0	0	0	0	0	0	0	0	0	0
WBGene00003095	lys-6	0	0	0	0	0	0	0	0	0	0
WBGene00003096	lys-7	0	0	0	0	0	0	0	0	0	0
WBGene00003097	lys-8	0	0	0	0	0	0	0	0	0	0
WBGene00003100	mab-3	0	0	0	0	0	0	0	0	0	0
WBGene00003102	mab-5	0	0	0	0	0	0	0	0	0	0
WBGene00003104	mab-7	0	0	0	0	0	0	0	0	0	0
WBGene00003106	mab-9	0	0	0	0	0	0	0	0	0	0
WBGene00003107	mab-10	0	9	0	0	0	0	0	0	0	5
WBGene00003111	mab-20	0	0	0	0	0	0	0	0	0	0
WBGene00003112	mab-21	0	0	0	0	0	0	0	0	0	0
WBGene00003114	mab-23	0	0	0	0	0	0	0	0	0	0
WBGene00003119	mac-1	0	0	0	0	0	0	0	0	0	6
WBGene00003123	mag-1	0	0	0	0	0	0	0	0	0	0
WBGene00003124	mai-1	0	0	0	0	0	0	0	0	0	2
WBGene00003129	map-1	0	0	0	0	0	0	0	0	0	0
WBGene00003130	map-2	0	0	0	0	0	0	0	0	1	0
WBGene00003132	mat-1	0	0	0	0	0	0	1	0	0	0
WBGene00003133	mat-2	0	0	0	0	0	1	0	0	0	0
WBGene00003134	mat-3	0	0	0	0	0	0	0	0	2	0
WBGene00003136	mau-2	0	0	0	0	0	0	0	0	0	0
WBGene00003142	mau-8	0	0	0	0	0	0	0	0	0	0
WBGene00003143	max-1	0	0	0	0	0	0	0	0	0	0
WBGene00003144	max-2	2	5	0	0	0	0	8	0	4	1
WBGene00003148	mbf-1	0	0	0	0	0	0	0	0	0	12
WBGene00003149	mbk-1	0	0	0	0	0	0	0	0	0	1
WBGene00003150	mbk-2	4	5	0	0	1	0	0	0	0	3
WBGene00003151	mca-1	0	0	0	0	0	0	0	0	2	0
WBGene00003153	mca-3	0	5	0	0	3	0	12	9	7	22
WBGene00003154	mcm-2	0	0	0	0	0	0	0	0	0	0
WBGene00003155	mcm-3	0	0	0	0	0	0	0	0	0	0
WBGene00003156	mcm-4	0	0	0	0	0	0	0	0	0	0
WBGene00003157	mcm-5	0	0	0	0	0	0	0	0	0	0
WBGene00003158	mcm-6	0	0	0	0	0	0	0	0	0	0
WBGene00003159	mcm-7	0	0	0	0	0	0	0	0	0	0
WBGene00003160	mdf-1	0	0	0	0	0	0	5	0	0	0
WBGene00003161	mdf-2	0	0	0	0	0	0	0	0	0	0
WBGene00003162	mdh-2	0	4	0	0	0	0	0	0	0	24
WBGene00003163	mdl-1	2	0	0	0	0	0	8	1	1	17
WBGene00003164	mdt-6	0	0	0	0	0	6	0	0	0	0
WBGene00003165	mec-1	0	0	0	0	0	0	0	0	0	7
WBGene00003166	mec-2	1	0	0	0	0	0	0	0	0	3
WBGene00003167	mec-3	0	0	0	0	0	0	0	0	0	0
WBGene00003168	mec-4	0	0	0	0	0	0	0	0	0	0
WBGene00003169	mec-5	0	0	0	0	0	0	0	0	0	0
WBGene00003170	mec-6	0	0	0	0	0	0	0	0	0	0
WBGene00003171	mec-7	0	0	0	0	0	0	0	0	0	1
WBGene00003172	mec-8	0	6	0	0	0	0	3	0	0	0
WBGene00003173	mec-9	0	0	0	0	0	0	0	0	0	0
WBGene00003174	mec-10	0	0	0	0	0	0	0	0	0	0
WBGene00003175	mec-12	0	0	0	0	0	0	0	0	0	8
WBGene00003176	mec-14	0	0	0	0	0	0	0	0	0	0
WBGene00003177	mec-15	0	0	0	0	0	0	0	0	0	0
WBGene00003178	mec-17	4	0	0	0	0	0	0	0	0	0
WBGene00003179	mec-18	0	0	0	0	0	0	0	0	0	0
WBGene00003181	med-2	0	0	0	0	0	0	0	0	0	0
WBGene00003182	mef-2	0	0	0	0	0	0	4	0	0	2
WBGene00003183	mei-1	0	0	0	0	0	0	0	0	0	0
WBGene00003184	mei-2	0	0	0	0	0	0	0	0	0	0
WBGene00003185	mek-1	1	0	0	0	0	0	3	0	0	0
WBGene00003186	mek-2	0	0	0	0	0	0	0	0	0	0
WBGene00003196	mel-11	0	0	0	0	0	0	0	1	0	16
WBGene00003209	mel-26	0	0	0	0	0	0	0	0	0	0
WBGene00003210	mel-28	0	0	0	0	0	0	0	0	0	0
WBGene00003214	mel-32	0	0	0	0	0	0	0	0	0	2
WBGene00003216	mel-43	0	0	0	0	0	0	0	0	0	0
WBGene00003218	mep-1	1	0	0	0	3	0	0	4	0	10
WBGene00003219	mes-1	0	0	0	0	0	0	0	0	0	0
WBGene00003220	mes-2	0	0	0	0	0	0	0	0	0	0
WBGene00003221	mes-3	0	0	0	0	0	0	8	0	0	6
WBGene00003222	mes-4	0	0	0	0	0	0	0	0	1	0
WBGene00003224	mes-6	0	0	0	0	0	0	0	0	0	0
WBGene00003225	mev-1	0	0	0	0	0	0	2	0	0	0
WBGene00003228	mex-1	0	0	0	0	0	0	0	0	0	0
WBGene00003229	mex-3	0	0	0	0	0	0	0	0	1	0
WBGene00003230	mex-5	0	0	0	0	0	0	0	0	0	0
WBGene00003231	mex-6	0	0	0	0	0	0	0	0	0	0
WBGene00003232	mgl-1	0	0	0	0	0	0	0	0	0	0
WBGene00003233	mgl-2	0	0	0	0	0	0	0	0	0	0
WBGene00003234	mif-1	0	0	0	0	0	0	0	0	3	0
WBGene00003235	mif-2	0	0	0	0	0	0	0	0	0	0
WBGene00003236	mif-3	0	0	0	0	0	0	0	0	0	0
WBGene00003237	mif-4	0	0	0	0	0	0	1	0	0	0
WBGene00003238	mig-1	0	0	0	0	0	0	0	0	0	0
WBGene00003239	mig-2	0	0	0	0	0	0	0	0	0	0
WBGene00003241	mig-5	0	0	0	0	0	0	0	0	0	4
WBGene00003242	mig-6	5	0	0	0	0	0	0	0	15	57
WBGene00003243	mig-10	0	0	0	0	0	0	0	0	0	6
WBGene00003245	mig-13	0	0	0	0	0	0	0	0	0	0
WBGene00003246	mig-14	0	0	0	0	0	0	0	0	0	0
WBGene00003247	mig-15	0	0	0	0	0	0	3	4	0	3
WBGene00003248	mig-17	0	0	0	0	0	0	0	0	0	0
WBGene00003249	mig-18	0	0	0	0	0	0	0	0	0	0
WBGene00003252	mig-21	0	0	0	0	0	0	0	0	0	0
WBGene00003253	mig-22	0	0	0	0	0	0	0	0	0	0
WBGene00003254	mig-23	0	0	0	0	0	0	0	0	0	0
WBGene00003258	cogc-1	0	0	4	0	0	0	0	0	1	0
WBGene00003262	mir-34	0	0	0	0	0	0	0	0	0	0
WBGene00003272	mir-44	0	0	0	0	0	0	0	0	0	0
WBGene00003275	mir-47	0	0	0	0	0	0	0	0	0	0
WBGene00003279	mir-51	0	0	0	0	0	0	0	0	0	0
WBGene00003281	mir-53	0	0	0	0	0	0	0	0	0	0
WBGene00003283	mir-55	0	0	0	0	0	0	0	0	0	0
WBGene00003284	mir-56	0	0	0	0	0	0	0	0	0	0
WBGene00003289	mir-61	0	0	0	0	0	0	0	0	0	0
WBGene00003300	mir-72	0	0	0	0	0	0	0	0	0	0
WBGene00003309	mir-81	0	0	0	0	0	0	0	0	0	0
WBGene00003312	mir-84	0	0	0	0	0	0	0	0	0	0
WBGene00003323	mir-230	0	0	0	0	0	0	0	0	0	0
WBGene00003333	mir-239.2	0	0	0	0	0	0	0	0	0	0
WBGene00003335	mir-241	0	0	0	0	0	0	0	0	0	0
WBGene00003339	mir-245	0	0	0	0	0	0	0	0	0	0
WBGene00003340	mir-246	0	0	0	0	0	0	0	0	0	0
WBGene00003349	mir-255	0	0	0	0	0	0	0	0	0	0
WBGene00003351	mir-257	0	0	0	0	0	0	0	0	0	0
WBGene00003352	mir-258.1	0	0	0	0	0	0	0	0	0	0
WBGene00003357	mir-264	0	0	0	0	0	0	0	0	0	0
WBGene00003367	mix-1	0	0	0	0	0	0	2	0	10	0
WBGene00003368	mkk-4	0	0	0	0	0	0	0	0	0	0
WBGene00003369	mlc-1	0	0	0	0	0	0	2	0	0	16
WBGene00003370	mlc-2	0	0	0	0	0	0	0	0	0	7
WBGene00003371	mlc-3	0	0	0	0	0	0	4	0	12	56
WBGene00003372	mlc-4	0	2	0	0	0	0	0	0	0	0
WBGene00003373	mlh-1	0	0	0	0	0	0	0	0	0	0
WBGene00003374	mlk-1	0	5	0	0	0	0	0	0	2	6
WBGene00003375	mlp-1	0	0	0	0	0	0	0	0	0	5
WBGene00003376	mls-1	0	0	0	0	0	0	0	0	0	0
WBGene00003377	mls-2	0	0	0	0	0	0	0	0	0	0
WBGene00003378	mml-1	2	0	0	0	0	0	4	0	0	2
WBGene00003380	mnm-2	0	0	0	0	0	0	0	0	0	0
WBGene00003384	moc-1	0	0	0	0	0	0	0	0	0	0
WBGene00003385	moc-2	0	0	0	0	0	0	0	0	0	0
WBGene00003386	mod-1	0	0	0	0	0	0	0	0	0	0
WBGene00003387	mod-5	0	0	0	0	0	0	0	0	0	0
WBGene00003388	moe-3	0	0	0	0	0	0	0	0	0	0
WBGene00003389	mog-1	0	0	0	0	0	0	0	0	0	0
WBGene00003390	mog-2	0	0	0	0	0	0	0	0	0	0
WBGene00003391	mog-3	0	0	0	0	0	0	3	0	5	0
WBGene00003392	mog-4	0	0	0	0	0	0	0	0	0	0
WBGene00003393	mog-5	0	0	0	0	0	0	0	0	7	1
WBGene00003394	mom-1	0	0	0	0	0	0	0	0	0	0
WBGene00003395	mom-2	0	0	0	0	0	0	0	0	0	0
WBGene00003396	mom-4	0	0	0	0	0	0	0	0	0	0
WBGene00003397	mom-5	0	0	0	0	0	0	0	0	0	0
WBGene00003400	dapk-1	0	0	0	0	0	0	4	0	0	8
WBGene00003401	mpk-1	0	2	0	0	10	0	0	0	0	5
WBGene00003402	mpk-2	0	0	0	0	0	0	0	0	0	0
WBGene00003403	mps-1	0	0	0	0	0	0	0	0	0	0
WBGene00003404	mpz-1	0	0	0	0	0	0	0	0	1	3
WBGene00003405	mre-11	0	0	0	0	0	0	0	0	1	0
WBGene00003406	mrg-1	0	0	0	0	0	0	0	0	0	0
WBGene00003407	mrp-1	0	2	0	0	6	0	6	0	4	4
WBGene00003408	mrp-2	0	1	0	0	0	0	0	0	0	4
WBGene00003409	mrp-3	0	0	0	0	0	0	0	0	0	0
WBGene00003410	mrp-4	0	0	0	0	0	0	0	0	5	0
WBGene00003411	mrp-5	0	0	0	0	0	0	0	0	0	8
WBGene00003412	mrp-6	0	0	0	0	0	0	0	0	0	0
WBGene00003413	mrp-7	0	0	0	0	0	0	0	0	0	0
WBGene00003414	mrp-8	0	0	0	0	0	0	0	0	0	0
WBGene00003415	mars-1	0	0	0	0	0	0	1	7	0	0
WBGene00003417	mrt-2	0	0	0	0	0	0	0	0	0	0
WBGene00003418	msh-2	0	0	0	0	0	0	0	0	0	0
WBGene00003420	msh-4	0	0	0	0	0	0	0	0	0	0
WBGene00003421	msh-5	0	0	0	0	0	0	0	0	0	0
WBGene00003422	msh-6	0	0	0	0	0	0	0	0	0	0
WBGene00003423	msi-1	0	7	0	0	0	0	1	0	8	15
WBGene00003424	msp-3	0	0	0	0	0	0	0	0	0	1
WBGene00003425	msp-10	0	0	0	0	0	0	0	0	0	0
WBGene00003426	msp-19	0	0	0	0	0	0	0	0	0	0
WBGene00003430	msp-32	0	0	0	0	0	0	0	0	0	0
WBGene00003431	msp-33	0	0	0	0	0	0	0	0	0	0
WBGene00003432	msp-36	0	0	0	0	0	0	0	0	0	5
WBGene00003434	msp-38	0	0	0	0	0	0	0	0	0	0
WBGene00003435	msp-40	0	0	0	0	0	0	0	0	0	3
WBGene00003442	msp-49	0	0	0	0	0	0	0	0	0	2
WBGene00003443	msp-50	0	0	0	0	0	0	0	0	0	2
WBGene00003444	msp-51	0	0	0	0	0	0	0	0	0	0
WBGene00003445	msp-52	0	0	0	0	0	0	0	0	0	0
WBGene00003446	msp-53	0	0	0	0	0	0	0	0	0	1
WBGene00003448	msp-55	0	0	0	0	0	0	0	0	0	0
WBGene00003449	msp-56	0	0	0	0	0	0	0	0	0	0
WBGene00003450	msp-57	0	0	0	0	0	0	0	0	0	0
WBGene00003451	msp-58	0	0	0	0	0	0	0	0	0	1
WBGene00003452	msp-59	0	0	0	0	0	0	0	0	0	2
WBGene00003456	msp-63	0	0	0	0	0	0	0	0	0	0
WBGene00003457	msp-64	0	0	0	0	0	0	0	0	0	0
WBGene00003458	msp-65	0	0	0	0	0	0	0	0	0	0
WBGene00003460	msp-71	0	0	0	0	0	0	0	0	0	0
WBGene00003462	msp-74	0	0	0	0	0	0	0	0	0	0
WBGene00003463	msp-76	0	0	0	0	0	0	0	0	0	2
WBGene00003464	msp-77	0	0	0	0	0	0	0	0	0	0
WBGene00003465	msp-78	0	0	0	0	0	0	0	0	0	13
WBGene00003466	msp-79	0	0	0	0	0	0	0	0	0	8
WBGene00003467	msp-81	0	0	0	0	0	0	0	0	0	3
WBGene00003468	msp-113	0	0	0	0	0	0	0	0	0	4
WBGene00003469	msp-142	0	0	0	0	0	0	0	0	0	0
WBGene00003470	msp-152	0	0	0	0	0	0	0	0	0	5
[truncated: 16,815 more rows]

## Sheet: Seam cells expr matrix
	Cell barcode	ATCCTGTAACCTCCAACGCTGATC_comb	AGTGGTCAAGGCTAACGTCGTAGA_comb	CATCAAGTTGGCTTCAGTGTTCTA_comb	AGCAGGAAAGCAGGAACTGTAGCC_comb
Wormbase ID	Gene name	seam cell	seam cell	seam cell	seam cell
Transcript:F07A11.16	Transcript:F07A11.16	0	0	0	0
Transcript:F46A9.7	Transcript:F46A9.7	0	0	0	0
Transcript:W02B9.4	Transcript:W02B9.4	0	1	0	0
Transcript:W09G3.11	Transcript:W09G3.11	0	0	0	0
Transcript:Y48C3A.21	Transcript:Y48C3A.21	0	0	0	0
Transcript:Y50D4A.11	Transcript:Y50D4A.11	0	0	0	0
WBGene00000001	aap-1	0	0	0	0
WBGene00000002	aat-1	2	3	0	0
WBGene00000003	aat-2	0	0	0	0
WBGene00000004	aat-3	0	0	0	0
WBGene00000006	aat-5	0	0	0	0
WBGene00000007	aat-6	0	0	0	0
WBGene00000009	aat-8	0	0	0	0
WBGene00000010	aat-9	1	0	0	0
WBGene00000012	abf-1	0	0	0	0
WBGene00000013	abf-2	0	0	0	0
WBGene00000016	abf-5	0	0	0	0
WBGene00000017	abf-6	5	0	0	0
WBGene00000018	abl-1	2	0	0	0
WBGene00000019	abt-1	0	0	0	0
WBGene00000020	abt-2	5	0	0	0
WBGene00000021	abt-3	0	0	0	0
WBGene00000022	abt-4	0	0	0	0
WBGene00000023	abt-5	0	0	0	0
WBGene00000024	abu-1	0	0	0	0
WBGene00000025	abu-2	0	0	0	0
WBGene00000027	abu-4	0	0	0	0
WBGene00000029	abu-6	0	0	0	0
WBGene00000031	abu-8	0	0	0	0
WBGene00000032	abu-9	0	0	0	0
WBGene00000033	abu-10	0	0	0	0
WBGene00000034	abu-11	0	0	0	0
WBGene00000035	ace-1	0	0	0	0
WBGene00000036	ace-2	0	0	0	0
WBGene00000037	ace-3	0	0	0	0
WBGene00000038	ace-4	0	0	0	0
WBGene00000039	acn-1	1	6	0	0
WBGene00000040	aco-1	0	0	0	0
WBGene00000041	aco-2	6	0	0	0
WBGene00000042	acr-2	0	0	0	0
WBGene00000043	acr-3	0	0	0	0
WBGene00000044	acr-5	0	0	0	0
WBGene00000046	acr-7	2	0	0	0
WBGene00000047	acr-8	0	0	0	0
WBGene00000048	acr-9	0	0	0	0
WBGene00000050	acr-11	0	0	0	0
WBGene00000051	acr-12	0	0	0	0
WBGene00000054	acr-15	0	0	0	0
WBGene00000055	acr-16	0	0	0	0
WBGene00000056	acr-17	0	0	0	0
WBGene00000057	acr-18	0	0	0	0
WBGene00000058	acr-19	0	0	0	0
WBGene00000059	acr-20	0	0	0	0
WBGene00000060	acr-21	0	0	0	0
WBGene00000061	lgc-11	0	0	0	0
WBGene00000062	acr-23	0	0	0	0
WBGene00000063	act-1	29	8	0	0
WBGene00000064	act-2	2	3	0	0
WBGene00000065	act-3	21	0	0	0
WBGene00000066	act-4	129	52	2	19
WBGene00000067	act-5	0	13	2	0
WBGene00000068	acy-1	0	0	0	0
WBGene00000069	acy-2	0	0	0	0
WBGene00000070	acy-3	0	0	0	0
WBGene00000071	acy-4	0	0	0	0
WBGene00000072	add-1	0	0	0	0
WBGene00000073	add-2	0	0	0	0
WBGene00000074	adm-2	0	0	0	0
WBGene00000075	adm-4	0	0	0	0
WBGene00000079	adr-1	1	3	0	3
WBGene00000080	adr-2	0	0	0	0
WBGene00000081	ads-1	0	0	0	0
WBGene00000082	adt-1	0	0	0	0
WBGene00000083	adt-2	0	2	0	0
WBGene00000084	aex-1	0	0	0	0
WBGene00000085	aex-2	0	0	0	0
WBGene00000086	aex-3	0	5	0	0
WBGene00000088	aex-5	2	0	0	0
WBGene00000089	aex-6	0	0	0	0
WBGene00000090	age-1	6	0	0	0
WBGene00000092	ags-3	0	0	0	0
WBGene00000093	agt-1	0	0	0	0
WBGene00000094	agt-2	0	0	0	0
WBGene00000095	aha-1	0	0	0	0
WBGene00000096	ahr-1	0	0	0	0
WBGene00000097	aip-1	5	2	0	0
WBGene00000098	air-1	0	0	0	0
WBGene00000099	air-2	0	1	0	0
WBGene00000100	ajm-1	15	5	7	0
WBGene00000101	aka-1	1	0	0	9
WBGene00000102	akt-1	0	4	0	2
WBGene00000103	akt-2	7	1	0	0
WBGene00000105	alg-1	3	0	2	1
WBGene00000106	alg-2	0	0	0	0
WBGene00000107	alh-1	5	0	0	6
WBGene00000109	alh-3	0	0	0	0
WBGene00000110	alh-4	0	0	0	0
WBGene00000111	alh-5	0	0	0	0
WBGene00000112	alh-6	1	0	0	0
WBGene00000113	alh-7	0	0	0	0
WBGene00000114	alh-8	6	1	3	0
WBGene00000115	alh-9	0	0	0	0
WBGene00000116	alh-10	0	0	5	0
WBGene00000117	alh-11	0	0	0	1
WBGene00000118	alh-12	0	0	0	0
WBGene00000120	aly-1	0	0	0	0
WBGene00000121	aly-2	0	0	0	0
WBGene00000122	aly-3	6	0	0	0
WBGene00000123	ama-1	2	6	0	5
WBGene00000135	amt-3	0	0	0	0
WBGene00000136	amt-4	0	0	0	0
WBGene00000137	amx-1	0	0	0	0
WBGene00000138	amx-2	2	0	0	0
WBGene00000139	amx-3	0	0	0	0
WBGene00000140	anc-1	78	25	2	37
WBGene00000142	aos-1	0	5	0	0
WBGene00000143	apc-2	0	1	0	0
WBGene00000144	apc-10	0	0	0	0
WBGene00000145	apc-11	0	0	0	0
WBGene00000146	ape-1	0	0	0	0
WBGene00000147	aph-1	0	0	0	1
WBGene00000148	aph-2	0	0	0	0
WBGene00000149	apl-1	10	16	1	0
WBGene00000150	apm-1	0	1	0	0
WBGene00000151	apn-1	0	3	0	0
WBGene00000155	app-1	0	0	0	0
WBGene00000156	apr-1	0	0	0	0
WBGene00000157	aps-2	0	0	0	0
WBGene00000158	apg-1	2	0	0	4
WBGene00000159	aps-1	0	0	0	0
WBGene00000160	apb-1	0	0	0	3
WBGene00000161	apa-2	0	0	0	0
WBGene00000162	apd-3	4	4	0	3
WBGene00000163	apb-3	0	0	0	0
WBGene00000164	apm-3	0	0	0	0
WBGene00000165	aps-3	0	0	0	0
WBGene00000166	apt-9	0	0	0	0
WBGene00000168	apx-1	0	0	0	0
WBGene00000169	aqp-1	0	0	0	0
WBGene00000170	aqp-2	14	3	0	0
WBGene00000171	aqp-3	0	0	0	0
WBGene00000173	aqp-5	0	0	0	0
WBGene00000174	aqp-6	0	0	0	0
WBGene00000175	aqp-7	5	4	0	0
WBGene00000176	aqp-8	0	0	0	0
WBGene00000177	aqp-9	0	0	0	0
WBGene00000178	aqp-10	0	1	0	0
WBGene00000179	aqp-11	0	0	0	0
WBGene00000180	arc-1	4	0	0	0
WBGene00000181	ard-1	0	1	0	0
WBGene00000182	arf-1.2	2	9	0	4
WBGene00000183	arf-3	7	18	0	0
WBGene00000184	arf-6	3	5	0	0
WBGene00000186	ark-1	0	6	0	0
WBGene00000187	arl-1	0	0	0	0
WBGene00000189	arl-5	0	0	0	0
WBGene00000190	arf-1.1	0	0	0	0
WBGene00000191	arl-7	0	0	0	0
WBGene00000192	arl-8	0	0	0	0
WBGene00000195	arr-1	1	0	0	0
WBGene00000196	aars-1	0	0	0	0
WBGene00000197	aars-2	3	0	0	0
WBGene00000198	art-1	0	0	0	0
WBGene00000199	arx-1	0	8	0	1
WBGene00000200	arx-2	0	0	0	0
WBGene00000201	arx-3	9	0	0	0
WBGene00000202	exos-4.2	0	0	0	0
WBGene00000203	arx-5	0	0	0	0
WBGene00000204	arx-6	0	0	0	0
WBGene00000205	arx-7	0	0	0	0
WBGene00000206	asb-1	0	0	0	0
WBGene00000207	asb-2	3	3	0	0
WBGene00000208	asc-1	1	0	0	0
WBGene00000209	asg-1	1	2	0	0
WBGene00000210	asg-2	0	0	0	0
WBGene00000211	asm-1	0	0	0	0
WBGene00000214	asp-1	0	12	0	0
WBGene00000215	asp-2	0	0	0	0
WBGene00000216	asp-3	0	14	0	0
WBGene00000217	asp-4	0	0	0	0
WBGene00000218	asp-5	0	6	0	0
WBGene00000219	asp-6	0	6	0	0
WBGene00000220	atf-2	0	0	0	0
WBGene00000221	atf-5	5	0	0	0
WBGene00000222	atf-6	0	0	0	0
WBGene00000223	atf-7	31	3	5	3
WBGene00000224	atgp-1	6	0	0	0
WBGene00000225	atgp-2	0	0	0	0
WBGene00000226	atl-1	0	0	1	0
WBGene00000227	atm-1	0	0	0	0
WBGene00000228	atn-1	9	2	0	0
WBGene00000229	atp-2	22	20	5	5
WBGene00000230	atp-3	3	3	0	0
WBGene00000231	atx-2	6	4	0	0
WBGene00000232	avr-14	0	1	0	0
WBGene00000233	avr-15	0	0	0	0
WBGene00000235	baf-1	0	0	0	0
WBGene00000236	bag-1	0	0	0	0
WBGene00000237	bam-2	7	0	0	0
WBGene00000238	bar-1	0	1	0	0
WBGene00000239	bas-1	5	0	0	0
WBGene00000240	pah-1	0	0	0	0
WBGene00000241	bbs-1	0	0	0	0
WBGene00000242	bbs-2	0	0	0	0
WBGene00000244	bbs-8	0	0	0	0
WBGene00000245	bca-1	0	0	4	0
WBGene00000247	bec-1	0	0	0	0
WBGene00000248	ben-1	0	4	0	0
WBGene00000249	bir-1	0	0	0	0
WBGene00000250	bir-2	0	0	0	0
WBGene00000251	bli-1	0	0	0	0
WBGene00000252	bli-2	0	0	0	0
WBGene00000253	bli-3	0	0	0	0
WBGene00000254	bli-4	5	2	0	0
WBGene00000255	bli-5	0	0	0	0
WBGene00000256	bli-6	0	0	0	0
WBGene00000257	bmk-1	0	0	0	0
WBGene00000259	bpl-1	0	0	0	0
WBGene00000262	bra-1	0	0	0	0
WBGene00000263	F23H11.5	2	12	0	0
WBGene00000264	brc-1	0	3	0	0
WBGene00000265	brd-1	0	0	0	0
WBGene00000266	bre-1	0	0	0	2
WBGene00000267	bre-2	2	0	0	0
WBGene00000268	bre-3	6	10	0	0
WBGene00000269	bre-4	0	0	0	0
WBGene00000270	bre-5	0	0	0	0
WBGene00000271	brf-1	0	0	0	0
WBGene00000272	bro-1	0	0	0	0
WBGene00000273	brp-1	17	2	0	0
WBGene00000274	btf-1	0	2	0	4
WBGene00000275	bub-1	0	1	0	0
WBGene00000276	byn-1	6	0	0	0
WBGene00000277	cab-1	13	4	2	0
WBGene00000279	cah-1	0	0	0	0
WBGene00000280	cah-2	0	0	0	0
WBGene00000281	cah-3	0	0	0	0
WBGene00000282	cah-4	0	0	0	0
WBGene00000283	cah-5	0	0	0	0
WBGene00000284	cah-6	0	0	0	0
WBGene00000285	cal-1	0	0	0	0
WBGene00000286	cal-2	0	0	0	0
WBGene00000287	cal-3	0	0	0	0
WBGene00000288	cal-4	0	0	0	0
WBGene00000289	cam-1	0	0	0	0
WBGene00000292	cap-1	2	8	1	0
WBGene00000293	cap-2	3	5	0	0
WBGene00000294	cas-1	0	0	0	0
WBGene00000295	cat-1	0	0	0	0
WBGene00000296	cat-2	0	0	0	0
WBGene00000298	cat-4	0	0	0	0
WBGene00000302	cav-2	0	0	0	0
WBGene00000366	cbp-1	13	10	0	1
WBGene00000367	cca-1	0	0	0	0
WBGene00000368	ccb-1	0	0	1	0
WBGene00000369	ccf-1	0	0	0	0
WBGene00000370	ccg-1	2	0	0	0
WBGene00000371	cco-1	0	0	0	0
WBGene00000373	cyp-14A5	0	0	0	0
WBGene00000374	cyp-31A1	0	0	0	0
WBGene00000375	cyp-44A1	0	0	0	0
WBGene00000376	ccr-4	0	13	0	0
WBGene00000377	cct-1	2	1	0	1
WBGene00000378	cct-2	0	0	0	12
WBGene00000379	cct-4	2	9	0	2
WBGene00000380	cct-5	10	3	0	0
WBGene00000381	cct-6	7	2	0	1
WBGene00000382	cdc-6	0	0	0	0
WBGene00000383	cdc-14	5	2	0	0
WBGene00000386	cdc-25.1	0	0	0	0
WBGene00000387	cdc-25.2	0	0	0	0
WBGene00000389	cdc-25.4	0	0	0	0
WBGene00000390	cdc-42	0	1	1	0
WBGene00000391	cdd-1	0	0	0	0
WBGene00000393	cdf-1	0	0	0	0
WBGene00000395	cdh-3	0	0	0	0
WBGene00000396	cdh-4	5	0	1	0
WBGene00000397	cdh-5	0	0	0	0
WBGene00000399	cdh-7	0	0	0	0
WBGene00000401	cdh-9	0	0	0	0
WBGene00000402	cdh-10	0	0	0	0
WBGene00000403	casy-1	4	0	0	0
WBGene00000405	cdk-1	0	0	0	0
WBGene00000406	cdk-4	0	0	0	0
WBGene00000407	cdk-5	3	0	0	0
WBGene00000408	cdk-7	0	0	0	0
WBGene00000409	cdk-8	0	0	0	0
WBGene00000410	cdk-9	0	0	0	0
WBGene00000411	cdl-1	0	0	0	3
WBGene00000412	cdr-1	0	0	0	0
WBGene00000413	cdt-1	0	0	0	8
WBGene00000414	cec-1	3	0	0	0
WBGene00000415	ced-1	1	2	2	0
WBGene00000416	ced-2	0	0	0	0
WBGene00000417	ced-3	0	8	0	7
WBGene00000418	ced-4	0	0	0	0
WBGene00000419	ced-5	0	0	0	5
WBGene00000420	ced-6	3	0	0	0
WBGene00000421	ced-7	3	0	0	0
WBGene00000422	ced-8	0	0	0	0
WBGene00000423	ced-9	0	0	0	7
WBGene00000424	ced-10	0	1	0	1
WBGene00000425	ced-11	0	0	0	0
WBGene00000426	ced-12	0	9	0	0
WBGene00000428	ceh-1	0	0	0	0
WBGene00000429	ceh-2	0	0	0	0
WBGene00000431	ceh-6	0	0	0	0
WBGene00000433	ceh-8	0	0	0	0
WBGene00000434	ceh-9	0	0	0	0
WBGene00000435	ceh-10	0	1	0	0
WBGene00000437	ceh-13	5	0	0	0
WBGene00000438	ceh-14	0	0	0	0
WBGene00000439	ceh-16	6	0	2	2
WBGene00000441	ceh-18	3	1	0	0
WBGene00000442	ceh-19	0	0	0	0
WBGene00000443	ceh-20	0	2	0	0
WBGene00000444	ceh-21	0	0	0	0
WBGene00000445	ceh-22	0	0	0	0
WBGene00000446	ceh-23	0	0	0	0
WBGene00000447	ceh-24	0	0	0	0
WBGene00000448	pros-1	0	0	0	0
WBGene00000449	ceh-27	1	0	0	0
WBGene00000451	ceh-30	0	0	0	0
WBGene00000453	ceh-32	0	0	0	0
WBGene00000454	ceh-33	0	0	0	0
WBGene00000455	ceh-34	6	0	0	0
WBGene00000458	ceh-37	0	0	0	0
WBGene00000459	ceh-38	2	0	2	0
WBGene00000460	ceh-39	1	0	0	0
WBGene00000461	ceh-40	0	0	0	0
WBGene00000462	ceh-41	0	0	0	0
WBGene00000463	ceh-43	0	0	0	0
WBGene00000464	ceh-44	7	1	0	2
WBGene00000465	cpg-1	0	0	0	0
WBGene00000466	cel-1	0	0	0	0
WBGene00000467	cep-1	0	0	0	0
WBGene00000469	ces-2	0	0	0	0
WBGene00000472	cey-1	6	10	1	4
WBGene00000473	cey-2	0	0	0	0
WBGene00000474	cey-3	0	0	0	0
WBGene00000475	cey-4	2	4	0	0
WBGene00000476	cfi-1	4	0	0	0
WBGene00000477	cft-1	0	5	0	0
WBGene00000478	cfz-2	1	0	0	0
WBGene00000479	cgh-1	3	2	0	0
WBGene00000480	cgp-1	0	0	0	0
WBGene00000481	cha-1	0	0	0	0
WBGene00000482	chd-3	2	0	0	0
WBGene00000484	che-2	0	0	0	0
WBGene00000485	che-3	2	0	0	0
WBGene00000488	che-7	0	0	0	0
WBGene00000490	che-11	0	0	0	0
WBGene00000491	che-12	4	0	0	0
WBGene00000492	che-13	0	0	0	0
WBGene00000493	che-14	0	0	0	0
WBGene00000496	chs-1	0	0	0	0
WBGene00000497	chs-2	0	0	0	1
WBGene00000498	chk-1	0	0	0	0
WBGene00000499	chk-2	0	0	0	0
WBGene00000500	chn-1	0	0	0	0
WBGene00000501	cho-1	0	0	0	0
WBGene00000502	chp-1	0	0	0	0
WBGene00000503	cht-1	0	0	0	0
WBGene00000506	cic-1	0	0	0	0
WBGene00000507	cit-1.1	0	3	0	0
WBGene00000508	cit-1.2	0	0	0	0
WBGene00000509	cka-1	0	0	5	0
WBGene00000510	cka-2	0	0	0	0
WBGene00000511	ckb-1	0	0	0	0
WBGene00000512	ckb-2	0	4	0	0
WBGene00000514	ckb-4	0	0	0	0
WBGene00000515	ckc-1	0	0	0	0
WBGene00000516	cki-1	0	0	0	0
WBGene00000517	cki-2	0	0	0	0
WBGene00000518	ckk-1	0	6	0	0
WBGene00000519	cku-70	0	0	0	0
WBGene00000520	cku-80	0	0	0	0
WBGene00000521	cky-1	0	0	0	0
WBGene00000522	clc-1	0	0	0	0
WBGene00000523	clc-2	0	0	0	0
WBGene00000524	clc-3	0	0	0	0
WBGene00000526	clc-5	0	0	0	0
WBGene00000527	cle-1	0	2	0	6
WBGene00000528	clh-1	0	0	0	0
WBGene00000529	clh-2	2	0	0	0
WBGene00000530	clh-3	0	3	0	0
WBGene00000531	clh-4	0	0	0	0
WBGene00000532	clh-5	0	0	0	0
WBGene00000533	clh-6	0	0	0	0
WBGene00000534	cpi-2	4	0	0	0
WBGene00000535	cpi-1	0	0	0	0
WBGene00000536	clk-1	0	0	0	0
WBGene00000537	clk-2	0	0	0	1
WBGene00000540	cln-3.2	0	0	0	0
WBGene00000541	cln-3.3	0	0	0	0
WBGene00000542	clp-1	9	0	0	0
WBGene00000543	clp-2	0	0	0	0
WBGene00000544	clp-3	0	0	0	0
WBGene00000545	clp-4	0	0	1	0
WBGene00000546	clp-6	0	0	0	0
WBGene00000547	clp-7	0	0	0	0
WBGene00000548	clr-1	0	10	0	8
WBGene00000549	cls-2	2	5	5	0
WBGene00000550	clu-1	0	5	0	6
WBGene00000552	cmd-1	20	16	0	11
WBGene00000553	cmk-1	1	0	0	0
WBGene00000554	cnb-1	4	0	0	0
WBGene00000556	cnc-2	0	0	0	0
WBGene00000557	cnc-3	0	3	0	0
WBGene00000558	cnc-4	5	7	0	0
WBGene00000561	cnd-1	0	0	0	0
WBGene00000562	cng-1	0	0	0	0
WBGene00000564	cnk-1	0	3	0	0
WBGene00000565	cnt-1	0	0	0	0
WBGene00000566	cnt-2	1	3	0	1
WBGene00000567	cnx-1	2	9	2	0
WBGene00000583	cof-2	0	0	0	0
WBGene00000584	cog-1	0	0	0	0
WBGene00000585	cogc-2	0	0	0	0
WBGene00000591	coh-1	0	0	0	0
WBGene00000592	coh-3	0	0	0	0
WBGene00000594	col-3	0	2	0	0
WBGene00000599	col-10	0	8	0	0
WBGene00000601	col-12	0	0	0	0
WBGene00000602	col-13	0	0	0	0
WBGene00000603	col-14	0	0	0	0
WBGene00000606	col-17	0	42	0	0
WBGene00000608	col-19	0	0	0	0
WBGene00000610	col-33	0	0	0	0
WBGene00000611	col-34	5	6	0	0
WBGene00000613	col-36	0	0	0	0
WBGene00000615	col-38	0	0	0	0
WBGene00000616	col-39	0	0	0	0
WBGene00000617	col-40	0	0	0	0
WBGene00000618	col-41	0	21	0	0
WBGene00000620	col-43	0	0	0	0
WBGene00000622	col-45	0	0	0	0
WBGene00000623	col-46	0	0	0	0
WBGene00000624	col-47	0	0	0	0
WBGene00000625	col-48	0	0	0	0
WBGene00000626	col-49	0	0	0	0
WBGene00000627	col-50	0	0	0	0
WBGene00000628	col-51	0	0	0	0
WBGene00000630	col-53	0	0	0	0
WBGene00000631	col-54	0	0	0	0
WBGene00000633	col-56	0	0	0	0
WBGene00000634	col-58	0	0	0	0
WBGene00000636	col-60	0	0	0	0
WBGene00000637	col-61	0	0	0	0
WBGene00000639	col-63	0	0	0	0
WBGene00000640	col-64	0	0	0	0
WBGene00000641	col-65	0	5	0	0
WBGene00000645	col-69	0	0	0	0
WBGene00000646	H17B01.2	0	0	0	0
WBGene00000647	col-71	0	1	0	0
WBGene00000648	col-72	0	0	0	0
WBGene00000649	col-73	0	16	0	0
WBGene00000650	col-74	0	0	0	0
WBGene00000651	col-75	0	0	0	0
WBGene00000652	col-76	0	0	0	0
WBGene00000653	col-77	0	0	0	0
WBGene00000655	col-79	0	0	0	0
WBGene00000656	col-80	0	0	0	0
WBGene00000657	col-81	0	0	0	0
WBGene00000658	col-83	0	0	0	0
WBGene00000659	col-84	0	1	0	0
WBGene00000660	col-85	0	0	0	0
WBGene00000661	col-86	0	0	0	0
WBGene00000662	col-87	0	0	0	0
WBGene00000664	col-89	0	0	0	0
WBGene00000665	col-90	0	39	0	0
WBGene00000666	col-91	0	0	0	0
WBGene00000667	col-92	0	0	0	0
WBGene00000668	col-93	0	0	0	0
WBGene00000669	col-94	0	0	0	0
WBGene00000671	col-96	0	0	0	0
WBGene00000672	col-97	0	0	0	0
WBGene00000673	col-98	3	0	0	0
WBGene00000674	col-99	0	0	0	0
WBGene00000675	col-101	0	0	0	0
WBGene00000676	col-102	0	0	0	0
WBGene00000677	col-103	0	1	0	0
WBGene00000678	col-104	0	0	0	0
WBGene00000681	col-107	0	6	0	0
WBGene00000682	col-108	0	0	0	0
WBGene00000683	col-109	0	0	0	0
WBGene00000684	col-110	0	0	0	0
WBGene00000685	col-111	0	0	0	0
WBGene00000687	col-113	0	0	0	0
WBGene00000688	col-114	0	0	0	0
WBGene00000689	col-115	0	0	0	0
WBGene00000691	col-117	0	24	0	0
WBGene00000692	col-118	0	0	0	0
WBGene00000693	col-119	0	0	0	0
WBGene00000694	col-120	0	0	0	0
WBGene00000697	col-123	0	0	0	0
WBGene00000698	col-124	0	0	0	0
WBGene00000699	col-125	0	12	0	0
WBGene00000700	col-126	0	0	0	0
WBGene00000702	col-128	0	1	0	0
WBGene00000703	col-129	0	0	0	0
WBGene00000704	col-130	0	0	0	0
WBGene00000705	col-131	0	1	0	0
WBGene00000706	col-132	0	0	0	0
WBGene00000707	col-133	0	0	0	0
WBGene00000708	col-135	0	0	0	0
WBGene00000709	col-136	0	0	0	0
WBGene00000711	col-138	0	0	0	0
WBGene00000713	col-140	0	0	0	0
WBGene00000714	col-141	0	0	0	0
WBGene00000715	col-142	0	0	0	0
WBGene00000717	col-144	0	17	0	0
WBGene00000718	col-145	0	3	0	0
WBGene00000719	col-146	0	0	0	0
WBGene00000720	col-147	0	0	0	0
WBGene00000722	col-149	0	0	0	0
WBGene00000723	col-150	0	0	0	0
WBGene00000726	col-153	0	0	0	0
WBGene00000727	col-154	0	0	0	0
WBGene00000728	col-155	0	0	0	0
WBGene00000729	col-156	0	1	0	0
WBGene00000730	col-157	0	0	0	0
WBGene00000731	col-158	0	0	0	0
WBGene00000732	col-159	0	0	0	0
WBGene00000733	col-160	0	0	0	0
WBGene00000734	col-161	0	0	0	0
WBGene00000735	col-162	0	0	0	0
WBGene00000737	col-164	0	0	0	0
WBGene00000738	col-165	0	0	0	0
WBGene00000739	col-166	0	3	0	0
WBGene00000740	col-167	4	12	0	0
WBGene00000741	col-168	1	2	0	0
WBGene00000742	col-169	0	1	0	0
WBGene00000743	col-170	0	2	0	0
WBGene00000745	col-172	0	0	0	0
WBGene00000746	col-173	0	1	0	0
WBGene00000747	col-174	0	0	0	0
WBGene00000748	col-175	0	0	0	0
WBGene00000749	col-176	0	0	0	0
WBGene00000750	col-177	0	0	0	0
WBGene00000753	col-180	0	0	0	0
WBGene00000754	col-181	0	0	0	0
WBGene00000755	col-182	0	1	0	0
WBGene00000757	col-184	0	0	0	0
WBGene00000759	col-186	0	0	0	0
WBGene00000761	coq-1	0	0	0	0
WBGene00000762	coq-2	0	0	0	0
WBGene00000763	coq-3	0	4	4	0
WBGene00000764	coq-4	0	0	0	0
WBGene00000765	coq-5	0	0	0	0
WBGene00000766	coq-6	0	0	0	0
WBGene00000767	coq-8	2	0	0	0
WBGene00000768	cor-1	3	0	0	0
WBGene00000770	cpb-1	0	0	0	0
WBGene00000771	cpb-2	0	0	0	0
WBGene00000772	cpb-3	0	1	0	0
WBGene00000773	cpf-1	0	0	0	0
WBGene00000774	cpf-2	0	1	0	0
WBGene00000775	cpin-1	0	0	0	0
WBGene00000776	cpl-1	0	4	0	0
WBGene00000777	cpn-1	0	0	0	0
WBGene00000778	cpn-2	0	0	0	0
WBGene00000779	cpn-3	7	2	0	0
WBGene00000780	cpn-4	3	0	0	0
WBGene00000781	cpr-1	0	3	0	0
WBGene00000783	cpr-3	0	0	0	0
WBGene00000784	cpr-4	0	0	0	0
WBGene00000785	cpr-5	0	8	0	0
WBGene00000786	cpr-6	0	11	0	0
WBGene00000787	cps-6	0	2	0	0
WBGene00000788	cpz-1	0	4	0	0
WBGene00000789	cpz-2	0	0	0	0
WBGene00000792	crb-1	0	0	0	0
WBGene00000793	crh-1	8	3	1	0
WBGene00000794	crn-1	0	2	0	0
WBGene00000795	crn-2	0	7	0	0
WBGene00000796	crn-3	0	0	0	0
WBGene00000797	crn-4	0	0	0	0
WBGene00000798	crn-5	0	0	0	0
WBGene00000799	crn-6	0	0	0	0
WBGene00000800	cars-1	0	2	0	1
WBGene00000801	cars-2	0	1	0	0
WBGene00000802	crt-1	14	7	3	1
WBGene00000803	csb-1	0	0	0	0
WBGene00000804	csc-1	0	1	0	0
WBGene00000812	csk-1	2	0	0	0
WBGene00000813	csn-1	2	0	0	0
WBGene00000814	csn-2	0	0	0	0
WBGene00000815	csn-3	0	2	0	0
WBGene00000816	csn-4	2	0	0	0
WBGene00000817	csn-5	0	0	0	1
WBGene00000818	csn-6	0	0	0	0
WBGene00000819	csp-1	0	0	0	0
WBGene00000820	csp-2	0	0	0	0
WBGene00000822	csq-1	0	0	0	0
WBGene00000829	ctb-1	12	45	3	33
WBGene00000830	ctl-1	0	0	0	0
WBGene00000831	ctl-2	0	0	3	0
WBGene00000832	ctn-1	3	0	0	3
WBGene00000833	cts-1	21	13	0	2
WBGene00000834	cua-1	0	0	0	0
WBGene00000835	cuc-1	0	0	0	0
WBGene00000836	cul-1	0	0	0	0
WBGene00000837	cul-2	0	6	0	0
WBGene00000838	cul-3	0	0	0	1
WBGene00000839	cul-4	2	0	0	0
WBGene00000840	cul-5	0	0	0	0
WBGene00000841	cul-6	0	0	0	0
WBGene00000843	cup-2	0	0	0	0
WBGene00000845	cup-4	0	0	0	0
WBGene00000846	cup-5	2	0	0	0
WBGene00000854	cux-7	0	14	0	0
WBGene00000857	cwn-1	0	0	0	0
WBGene00000858	cwn-2	0	0	0	0
WBGene00000862	cwp-4	0	0	0	0
WBGene00000863	cya-1	0	1	0	0
WBGene00000864	cya-2	0	0	0	0
WBGene00000865	cyb-1	0	0	0	0
WBGene00000866	cyb-2.1	0	0	0	0
WBGene00000867	cyb-2.2	0	0	0	0
WBGene00000868	cyb-3	3	0	0	0
WBGene00000869	cyc-1	0	0	0	0
WBGene00000870	cyd-1	0	0	0	0
WBGene00000871	cye-1	0	1	0	4
WBGene00000872	cyk-1	2	0	7	0
WBGene00000874	cyk-3	6	2	0	0
WBGene00000875	cyk-4	0	5	0	0
WBGene00000876	cyl-1	0	9	0	0
WBGene00000877	cyn-1	0	0	0	0
WBGene00000878	cyn-2	0	0	0	0
WBGene00000879	cyn-3	0	4	0	0
WBGene00000880	cyn-4	0	0	0	0
WBGene00000881	cyn-5	0	3	0	0
WBGene00000882	cyn-6	0	4	0	0
WBGene00000883	cyn-7	11	7	0	6
WBGene00000884	cyn-8	1	0	0	0
WBGene00000885	cyn-9	0	0	0	0
WBGene00000886	cyn-10	0	1	0	0
WBGene00000887	cyn-11	0	0	0	0
WBGene00000888	cyn-12	0	0	0	0
WBGene00000889	cyn-13	0	0	0	0
WBGene00000890	sig-7	0	0	0	0
WBGene00000891	cyn-15	0	0	0	0
WBGene00000892	cyn-16	0	0	0	0
WBGene00000893	cyn-17	0	1	0	0
WBGene00000894	dab-1	6	3	0	0
WBGene00000895	dac-1	0	0	0	0
WBGene00000896	dad-1	0	0	0	0
WBGene00000897	daf-1	0	0	0	0
WBGene00000898	daf-2	6	5	0	0
WBGene00000899	daf-3	11	0	0	0
WBGene00000900	daf-4	9	0	0	0
WBGene00000901	daf-5	3	3	0	0
WBGene00000902	daf-6	0	0	0	0
WBGene00000903	daf-7	0	0	0	0
WBGene00000904	daf-8	0	0	0	0
WBGene00000905	daf-9	0	0	0	0
WBGene00000906	daf-10	0	0	0	0
WBGene00000907	daf-11	0	0	0	0
WBGene00000908	daf-12	1	0	0	0
WBGene00000910	daf-14	1	0	0	0
WBGene00000911	daf-15	4	12	0	0
WBGene00000912	daf-16	16	6	1	0
WBGene00000913	daf-18	2	0	0	0
WBGene00000914	daf-19	0	0	3	1
WBGene00000915	daf-21	62	9	2	4
WBGene00000917	daf-25	0	0	0	0
WBGene00000920	daf-28	0	0	0	0
WBGene00000923	daf-31	0	0	0	0
WBGene00000928	dao-2	0	5	0	0
WBGene00000929	dao-3	0	0	0	0
WBGene00000930	dao-4	0	0	0	0
WBGene00000931	dao-5	1	4	0	0
WBGene00000932	dao-6	0	0	0	0
WBGene00000933	dap-3	0	0	0	0
WBGene00000934	dat-1	0	0	0	0
WBGene00000935	daz-1	0	0	0	0
WBGene00000936	dbl-1	0	0	0	0
WBGene00000937	dbr-1	0	0	0	0
WBGene00000938	dcp-66	10	3	4	7
WBGene00000939	dcr-1	0	0	0	7
WBGene00000940	dcs-1	0	4	0	0
WBGene00000941	ddp-1	0	2	0	0
WBGene00000942	deb-1	20	9	0	11
WBGene00000950	deg-1	0	1	0	0
WBGene00000951	deg-3	0	0	0	0
WBGene00000952	del-1	0	0	0	0
WBGene00000953	del-2	0	0	0	0
WBGene00000955	des-2	0	1	0	0
WBGene00000958	dgk-1	5	0	0	0
WBGene00000959	dgk-2	1	5	0	5
WBGene00000960	dgk-3	0	0	0	0
WBGene00000961	dgn-1	0	0	0	0
WBGene00000962	dhc-1	15	28	1	9
WBGene00000963	dhp-1	0	0	0	0
WBGene00000964	dhp-2	0	0	0	0
WBGene00000965	dhs-1	0	0	0	0
WBGene00000966	dhs-2	0	0	0	0
WBGene00000967	dhs-3	0	0	0	0
WBGene00000968	dhs-4	0	0	0	0
WBGene00000969	dhs-5	0	0	0	0
WBGene00000970	dhs-6	0	0	0	0
WBGene00000972	dhs-8	0	0	0	0
WBGene00000973	dhs-9	0	0	0	0
WBGene00000974	dhs-11	0	0	0	0
WBGene00000975	dhs-12	0	0	0	0
WBGene00000976	dhs-13	1	0	0	0
WBGene00000978	dhs-15	0	0	0	0
WBGene00000979	dhs-16	0	0	0	0
WBGene00000980	dhs-17	1	0	0	0
WBGene00000982	dhs-19	10	0	0	0
WBGene00000983	dhs-20	10	0	4	0
WBGene00000984	dhs-21	0	0	0	0
WBGene00000985	dhs-22	0	0	0	0
WBGene00000987	dhs-24	0	0	0	0
WBGene00000988	dhs-25	2	4	0	0
WBGene00000989	dhs-26	0	0	0	0
WBGene00000990	dhs-27	0	0	0	0
WBGene00000991	dhs-28	0	0	5	0
WBGene00000993	dhs-30	0	0	0	0
WBGene00000994	dic-1	0	0	0	0
WBGene00000995	die-1	0	0	0	4
WBGene00000996	dif-1	0	3	1	0
WBGene00000998	dig-1	54	12	7	24
WBGene00001000	dim-1	4	12	4	0
WBGene00001001	dis-3	0	0	0	1
WBGene00001002	div-1	0	0	0	0
WBGene00001005	dlc-1	0	0	0	1
WBGene00001006	dlg-1	4	8	1	0
WBGene00001007	dli-1	5	4	0	0
WBGene00001008	dlk-1	13	4	0	0
WBGene00001016	dna-2	0	0	0	0
WBGene00001017	dnc-1	5	4	0	2
WBGene00001018	dnc-2	0	0	0	0
WBGene00001019	dnj-1	0	0	0	0
WBGene00001020	dnj-2	0	0	0	0
WBGene00001021	dnj-3	0	0	0	0
WBGene00001022	dnj-4	0	0	0	0
WBGene00001023	dnj-5	4	0	0	0
WBGene00001025	dnj-7	1	5	0	0
WBGene00001026	dnj-8	0	2	0	0
WBGene00001027	dnj-9	2	0	0	0
WBGene00001028	dnj-10	0	0	0	1
WBGene00001029	dnj-11	0	0	0	2
WBGene00001030	dnj-12	3	3	0	0
WBGene00001031	dnj-13	30	0	4	1
WBGene00001032	dnj-14	0	0	0	0
WBGene00001033	dnj-15	0	2	0	0
WBGene00001034	dnj-16	7	0	0	1
WBGene00001035	dnj-17	1	0	0	0
WBGene00001036	dnj-18	0	0	0	0
WBGene00001037	dnj-19	2	1	0	3
WBGene00001038	dnj-20	11	0	0	0
WBGene00001039	dnj-21	0	0	0	0
WBGene00001040	dnj-22	0	0	0	0
WBGene00001041	dnj-23	0	0	0	0
WBGene00001042	dnj-24	2	3	0	1
WBGene00001043	dnj-25	5	1	0	0
WBGene00001044	dnj-26	0	0	0	0
WBGene00001045	dnj-27	0	0	0	0
WBGene00001046	dnj-28	0	0	0	0
WBGene00001047	dnj-29	0	10	0	1
WBGene00001048	dnj-30	0	0	0	0
WBGene00001049	dog-1	0	4	0	3
WBGene00001050	dom-3	0	0	0	0
WBGene00001051	cks-1	0	0	0	0
WBGene00001052	dop-1	0	0	0	0
WBGene00001053	dop-2	0	0	0	0
WBGene00001054	dpf-1	0	0	0	0
WBGene00001055	dpf-2	0	0	0	0
WBGene00001056	dpf-3	0	0	0	0
WBGene00001057	dpf-4	0	0	0	0
WBGene00001058	dpf-5	1	0	0	0
WBGene00001059	dpf-6	0	1	0	0
WBGene00001060	dpf-7	0	2	0	1
WBGene00001061	dpl-1	0	0	0	0
WBGene00001063	dpy-1	0	0	0	0
WBGene00001064	dpy-2	0	0	0	0
WBGene00001065	dpy-3	0	0	0	0
WBGene00001066	dpy-4	0	62	0	0
WBGene00001067	dpy-5	0	53	0	0
WBGene00001068	dpy-6	4	0	0	0
WBGene00001069	dpy-7	0	0	0	0
WBGene00001070	dpy-8	0	1	0	0
WBGene00001071	dpy-9	0	0	0	0
WBGene00001072	dpy-10	0	0	0	0
WBGene00001073	dpy-11	0	11	0	0
WBGene00001074	dpy-13	0	58	0	0
WBGene00001075	dpy-14	0	0	0	0
WBGene00001077	dpy-18	6	0	0	0
WBGene00001078	dpy-19	0	0	0	0
WBGene00001079	dpy-20	0	0	0	0
WBGene00001080	dpy-21	9	0	0	7
WBGene00001081	dpy-22	15	11	0	5
WBGene00001082	dpy-23	2	0	0	0
WBGene00001085	dpy-26	5	0	0	0
WBGene00001086	dpy-27	0	0	0	0
WBGene00001087	dpy-28	0	2	0	0
WBGene00001088	dpy-30	0	0	0	0
WBGene00001089	dre-1	0	5	0	0
WBGene00001090	drh-1	0	3	0	0
WBGene00001091	drh-2	11	2	0	0
WBGene00001092	dro-1	0	0	0	0
WBGene00001093	drp-1	0	0	0	0
WBGene00001094	dars-1	0	2	3	0
WBGene00001095	dars-2	0	0	0	0
WBGene00001096	dsc-1	0	0	0	0
WBGene00001099	dsc-4	0	0	0	0
WBGene00001101	dsh-1	4	0	0	16
WBGene00001102	dsh-2	0	4	0	0
WBGene00001103	dsl-1	0	0	0	0
WBGene00001104	dsl-2	0	0	0	0
WBGene00001105	dsl-3	0	0	0	0
WBGene00001106	dsl-4	0	0	0	0
WBGene00001107	dsl-5	0	0	0	0
WBGene00001108	dsl-6	0	0	0	0
WBGene00001109	dsl-7	0	0	0	0
WBGene00001110	duo-1	0	0	0	0
WBGene00001112	duo-3	2	0	0	0
WBGene00001113	dur-1	0	0	0	0
WBGene00001115	dyb-1	0	0	0	2
WBGene00001116	dyc-1	0	0	0	0
WBGene00001117	dyf-1	0	0	0	0
WBGene00001118	dyf-2	1	0	0	0
WBGene00001119	dyf-3	0	0	0	0
WBGene00001121	dyf-5	0	0	0	0
WBGene00001122	dyf-6	0	0	0	0
WBGene00001123	dyf-7	0	0	0	0
WBGene00001127	dyf-11	0	0	0	0
WBGene00001129	dyf-13	0	0	0	0
WBGene00001130	dyn-1	4	0	0	0
WBGene00001131	dys-1	10	0	2	0
WBGene00001132	alp-1	4	6	0	0
WBGene00001133	eat-2	0	0	0	0
WBGene00001134	eat-3	3	3	0	5
WBGene00001135	eat-4	0	0	0	0
WBGene00001136	eat-5	0	0	0	0
WBGene00001137	eat-6	25	7	1	20
WBGene00001145	eat-16	16	9	0	0
WBGene00001148	eat-20	0	8	0	0
WBGene00001149	bcat-1	3	0	2	0
WBGene00001150	ech-1.1	0	0	0	0
WBGene00001151	ech-2	0	0	0	0
WBGene00001152	ech-3	0	0	0	0
WBGene00001153	ech-4	0	3	0	0
WBGene00001154	ech-5	0	1	0	0
WBGene00001155	ech-6	0	0	0	0
WBGene00001156	ech-7	0	0	0	0
WBGene00001157	ech-8	0	0	0	0
WBGene00001159	eff-1	3	0	0	0
WBGene00001160	efk-1	4	0	0	0
WBGene00001161	efl-1	0	0	0	0
WBGene00001162	efl-2	1	0	0	1
WBGene00001163	efn-2	0	0	0	0
WBGene00001164	efn-3	0	0	0	0
WBGene00001165	efn-4	0	0	0	0
WBGene00001166	eftu-2	0	0	0	2
WBGene00001167	eef-2	32	28	2	10
WBGene00001168	eef-1A.1	29	95	3	6
WBGene00001169	eef-1A.2	33	20	11	12
WBGene00001170	egl-1	0	0	0	0
WBGene00001171	egl-2	0	0	0	5
WBGene00001172	egl-3	15	0	0	0
WBGene00001173	egl-4	14	8	0	0
WBGene00001174	egl-5	0	0	0	0
WBGene00001175	egl-6	0	0	0	0
WBGene00001177	egl-8	2	2	0	0
WBGene00001178	egl-9	1	0	0	0
WBGene00001179	egl-10	6	0	4	0
WBGene00001182	egl-13	0	0	0	0
WBGene00001184	egl-15	0	0	0	30
WBGene00001185	egl-17	0	0	0	0
WBGene00001186	egl-18	4	0	0	0
WBGene00001187	egl-19	11	0	0	8
WBGene00001188	egl-20	0	0	0	0
WBGene00001189	egl-21	25	2	0	0
WBGene00001190	egl-23	0	0	0	0
WBGene00001193	egl-26	0	0	0	0
WBGene00001194	egl-27	12	4	9	1
WBGene00001196	egl-30	2	3	5	6
WBGene00001202	egl-36	0	0	0	0
WBGene00001204	egl-38	0	0	0	0
WBGene00001207	egl-43	0	0	0	0
WBGene00001208	egl-44	8	5	0	0
WBGene00001209	egl-45	4	5	2	0
WBGene00001210	egl-46	0	0	0	0
WBGene00001211	egl-47	6	0	0	0
WBGene00001214	ego-1	0	0	0	0
WBGene00001215	ego-2	6	0	0	2
WBGene00001224	ehs-1	0	0	0	0
WBGene00001225	eif-3.B	1	1	0	1
WBGene00001226	eif-3.C	0	1	0	1
WBGene00001227	eif-3.D	4	9	0	0
WBGene00001228	eif-3.E	0	0	0	0
WBGene00001229	eif-3.F	0	0	0	1
WBGene00001230	eif-3.G	0	1	0	0
WBGene00001231	eif-3.H	0	0	1	0
WBGene00001232	eif-3.I	0	0	0	1
WBGene00001233	eif-3.K	0	0	0	0
WBGene00001234	eif-6	0	0	0	0
WBGene00001235	elb-1	0	0	0	0
WBGene00001236	elc-1	0	0	0	0
WBGene00001237	elc-2	0	0	0	0
WBGene00001239	elo-1	0	0	0	0
WBGene00001240	elo-2	0	6	1	0
WBGene00001241	elo-3	4	10	0	0
WBGene00001242	elo-4	0	0	0	0
WBGene00001243	elo-5	0	1	1	0
WBGene00001244	elo-6	9	0	0	0
WBGene00001245	elo-7	0	0	0	0
WBGene00001246	elo-8	0	0	0	0
WBGene00001247	elo-9	5	0	0	0
WBGene00001248	elp-1	0	0	0	0
WBGene00001249	elt-1	0	0	0	0
WBGene00001250	elt-2	0	0	0	0
WBGene00001251	elt-3	0	4	0	0
WBGene00001253	elt-6	0	0	0	0
WBGene00001258	emb-4	0	0	0	9
WBGene00001259	emb-5	0	5	0	6
WBGene00001262	emb-8	24	6	1	0
WBGene00001263	emb-9	2	20	4	0
WBGene00001281	emb-27	0	0	0	0
WBGene00001284	emb-30	4	0	0	0
WBGene00001303	emo-1	2	1	0	8
WBGene00001309	emr-1	0	0	0	0
WBGene00001310	end-1	0	0	0	0
WBGene00001311	end-3	0	0	0	0
WBGene00001320	ent-1	0	0	0	0
WBGene00001324	eor-1	0	0	0	0
WBGene00001325	eor-2	0	0	0	0
WBGene00001328	epi-1	7	7	0	43
WBGene00001329	epn-1	0	6	2	1
WBGene00001330	eps-8	10	0	0	0
WBGene00001331	erd-2	2	0	0	0
WBGene00001332	eri-1	0	5	0	0
WBGene00001333	erm-1	0	7	0	2
WBGene00001334	ero-1	0	0	6	0
WBGene00001335	erp-1	0	2	0	0
WBGene00001336	qars-1	0	2	0	11
WBGene00001337	ears-1	1	2	0	5
WBGene00001338	ears-2	0	1	0	0
WBGene00001340	etr-1	0	0	0	0
WBGene00001345	fos-1	0	0	0	0
WBGene00001352	evl-14	0	3	8	4
WBGene00001358	evl-20	3	0	0	0
WBGene00001365	exc-4	1	0	0	0
WBGene00001366	exc-5	10	0	0	9
WBGene00001368	exc-7	0	0	0	0
WBGene00001371	exl-1	0	0	0	0
WBGene00001372	exo-3	0	0	0	0
WBGene00001373	exp-1	0	0	0	0
WBGene00001374	exp-2	0	0	0	0
WBGene00001377	eya-1	0	0	0	0
WBGene00001385	far-1	2	4	0	7
WBGene00001386	far-2	0	5	0	0
WBGene00001387	far-3	0	0	0	0
WBGene00001389	far-5	0	0	0	0
WBGene00001390	far-6	0	0	0	0
WBGene00001391	far-7	0	0	0	0
WBGene00001392	far-8	1	0	0	0
WBGene00001393	fat-1	0	0	4	0
WBGene00001394	fat-2	0	1	1	0
WBGene00001395	fat-3	0	15	2	0
WBGene00001396	fat-4	0	0	0	0
WBGene00001397	fat-5	0	0	0	0
WBGene00001398	fat-6	1	1	2	0
WBGene00001399	fat-7	0	0	0	0
WBGene00001400	fax-1	0	0	0	0
WBGene00001401	fbf-1	0	0	0	0
WBGene00001402	fbf-2	0	0	0	0
WBGene00001403	fbl-1	0	0	1	0
WBGene00001404	fbp-1	0	13	0	0
WBGene00001405	fce-1	0	0	0	0
WBGene00001406	fce-2	0	0	0	0
WBGene00001410	feh-1	1	0	0	0
WBGene00001411	fem-1	0	0	0	0
WBGene00001412	fem-2	0	0	0	1
WBGene00001413	fem-3	0	2	0	0
WBGene00001414	fer-1	0	0	0	0
WBGene00001423	fib-1	1	8	0	1
WBGene00001424	fis-1	0	0	0	0
WBGene00001425	fis-2	0	0	0	0
WBGene00001426	fkb-1	3	4	1	0
WBGene00001427	fkb-2	0	11	0	0
WBGene00001428	fkb-3	0	5	0	0
WBGene00001429	fkb-4	0	0	0	0
WBGene00001430	fkb-5	0	6	0	0
WBGene00001431	fkb-6	0	0	3	0
WBGene00001432	fkb-7	0	4	0	0
WBGene00001433	fkb-8	0	0	0	0
WBGene00001434	fkh-2	0	0	0	0
WBGene00001436	fkh-4	0	0	0	0
WBGene00001438	fkh-6	0	0	0	0
WBGene00001439	fkh-7	9	0	0	6
WBGene00001440	fkh-8	0	0	0	0
WBGene00001441	fkh-9	4	0	0	0
WBGene00001443	fli-1	2	0	0	9
WBGene00001444	flp-1	0	0	0	0
WBGene00001445	flp-2	0	0	0	0
WBGene00001446	flp-3	0	0	0	0
WBGene00001447	flp-4	0	0	0	0
WBGene00001448	flp-5	0	1	0	0
WBGene00001449	flp-6	2	0	0	0
WBGene00001450	flp-7	0	0	0	0
WBGene00001451	flp-8	0	0	0	0
WBGene00001452	flp-9	0	0	0	0
WBGene00001453	flp-10	0	0	0	0
WBGene00001454	flp-11	0	0	0	0
WBGene00001455	flp-12	5	5	0	0
WBGene00001456	flp-13	0	0	0	0
WBGene00001457	flp-14	7	1	0	0
WBGene00001458	flp-15	5	0	0	0
WBGene00001459	flp-16	1	0	0	0
WBGene00001460	flp-17	0	0	0	0
WBGene00001461	flp-18	0	1	0	0
WBGene00001462	flp-19	0	0	0	0
WBGene00001463	flp-20	0	0	0	0
WBGene00001464	flp-21	0	0	0	0
WBGene00001465	flr-1	0	0	0	0
WBGene00001466	flr-2	0	0	0	0
WBGene00001470	baz-2	0	0	0	0
WBGene00001475	fmi-1	2	1	0	0
WBGene00001476	fmo-1	0	0	0	0
WBGene00001477	fmo-2	0	0	0	0
WBGene00001478	fmo-3	0	0	0	0
WBGene00001479	fmo-4	0	7	0	0
WBGene00001480	fmo-5	3	0	0	0
WBGene00001481	fog-1	0	0	0	0
WBGene00001482	fog-2	0	0	0	0
WBGene00001483	fog-3	0	0	0	0
WBGene00001484	fox-1	0	0	0	0
WBGene00001485	fre-1	0	0	0	0
WBGene00001486	frh-1	0	5	0	0
WBGene00001487	frk-1	0	0	0	0
WBGene00001488	frm-1	46	10	3	27
WBGene00001489	frm-2	0	0	0	0
WBGene00001490	frm-3	2	10	0	0
WBGene00001491	frm-4	0	3	0	6
WBGene00001492	frm-5.1	0	0	0	0
WBGene00001493	frm-7	15	6	0	0
WBGene00001494	frm-8	0	4	1	0
WBGene00001495	frm-9	0	0	0	0
WBGene00001496	frm-10	29	0	0	0
WBGene00001497	fars-1	0	3	0	0
WBGene00001498	fars-3	1	0	3	5
WBGene00001499	fsn-1	0	0	0	6
WBGene00001500	ftn-1	0	0	0	0
WBGene00001501	ftn-2	0	1	0	0
WBGene00001502	ftt-2	38	1	0	0
WBGene00001503	fum-1	8	2	0	0
WBGene00001505	fut-1	0	0	0	0
WBGene00001506	fut-2	0	0	0	0
WBGene00001507	fut-4	0	0	0	0
WBGene00001508	fut-8	0	0	0	0
WBGene00001509	fzo-1	0	0	0	0
WBGene00001510	fzr-1	1	0	0	0
WBGene00001511	fzy-1	0	0	0	0
WBGene00001512	gab-1	0	0	0	0
WBGene00001513	gad-1	0	0	0	0
WBGene00001514	xnd-1	0	0	0	0
WBGene00001515	gap-1	0	0	0	0
WBGene00001516	gap-2	1	0	0	0
WBGene00001517	gar-1	0	0	0	0
WBGene00001518	gar-2	0	0	0	0
WBGene00001519	gar-3	0	0	0	3
WBGene00001520	gas-1	1	1	0	0
WBGene00001522	gbh-1	2	0	0	0
WBGene00001523	gbh-2	4	4	0	0
WBGene00001526	gck-1	0	5	0	0
WBGene00001527	gcs-1	2	0	0	0
WBGene00001528	gcy-1	0	0	0	0
WBGene00001529	gcy-2	0	0	0	0
WBGene00001530	gcy-3	0	0	0	0
WBGene00001531	gcy-4	0	0	0	0
WBGene00001532	gcy-5	0	0	0	0
WBGene00001534	gcy-7	0	0	0	0
WBGene00001535	gcy-8	0	0	0	0
WBGene00001536	gcy-9	0	0	0	0
WBGene00001537	gcy-11	0	0	0	0
WBGene00001538	gcy-12	6	0	0	0
WBGene00001539	gcy-13	0	0	0	0
WBGene00001540	gcy-14	0	0	0	0
WBGene00001541	gcy-15	0	0	0	0
WBGene00001542	gcy-17	0	0	0	0
WBGene00001543	gcy-18	0	0	0	0
WBGene00001545	gcy-20	0	0	0	0
WBGene00001546	gcy-21	0	0	0	0
WBGene00001547	gcy-22	0	0	0	0
WBGene00001548	gcy-23	0	0	0	0
WBGene00001549	gcy-25	0	0	0	0
WBGene00001551	gcy-31	0	0	0	0
WBGene00001552	gcy-32	0	0	0	0
WBGene00001553	gcy-33	0	0	0	0
WBGene00001554	gcy-34	0	0	0	0
WBGene00001555	gcy-35	0	0	0	0
WBGene00001556	gcy-36	0	0	0	0
WBGene00001557	gcy-37	0	0	0	0
WBGene00001558	gdi-1	0	7	4	0
WBGene00001559	gei-1	11	1	0	0
WBGene00001560	gei-3	0	0	0	0
WBGene00001561	gei-4	20	4	0	9
WBGene00001562	lin-66	19	0	0	2
WBGene00001563	gei-6	0	6	0	0
WBGene00001564	icl-1	17	3	3	0
WBGene00001565	gei-8	2	0	0	0
WBGene00001566	acdh-13	0	0	0	0
WBGene00001568	snpc-4	0	0	0	0
WBGene00001569	meg-3	0	0	0	0
WBGene00001570	gei-13	0	9	0	0
WBGene00001571	gei-14	0	0	0	0
WBGene00001572	gei-15	0	0	0	0
WBGene00001574	gei-17	1	0	0	1
WBGene00001575	gei-18	0	0	0	0
WBGene00001577	gem-4	0	0	0	0
WBGene00001578	ges-1	0	0	0	0
WBGene00001579	gex-2	3	0	0	0
WBGene00001580	gex-3	5	0	0	0
WBGene00001581	gfi-1	0	3	5	0
WBGene00001582	gfi-2	1	9	0	0
WBGene00001583	gfi-3	0	0	0	0
WBGene00001584	nrde-4	0	0	0	0
WBGene00001585	gfl-1	0	0	0	0
WBGene00001586	ggr-1	5	0	0	0
WBGene00001587	ggr-2	1	0	0	0
WBGene00001588	ggr-3	0	0	0	0
WBGene00001589	gip-1	0	0	0	0
WBGene00001590	C45G3.3	0	0	0	0
WBGene00001591	glc-1	0	1	0	0
WBGene00001592	glc-2	0	0	0	0
WBGene00001593	glc-3	0	0	0	0
WBGene00001594	glc-4	0	0	0	0
WBGene00001595	gld-1	0	0	0	0
WBGene00001596	gld-2	6	4	0	0
WBGene00001597	gld-3	0	0	0	0
WBGene00001598	glh-1	0	6	0	0
WBGene00001599	glh-2	0	0	0	0
WBGene00001600	glh-3	0	0	0	0
WBGene00001601	glh-4	0	0	0	0
WBGene00001602	gln-1	0	0	0	0
WBGene00001603	gln-2	0	0	0	0
WBGene00001604	gln-3	0	0	2	0
WBGene00001605	gln-4	0	0	0	0
WBGene00001606	gln-5	0	0	0	0
WBGene00001607	gln-6	0	0	0	0
WBGene00001608	R07B1.8	0	0	0	0
WBGene00001609	glp-1	0	3	0	0
WBGene00001612	glr-1	0	0	0	0
WBGene00001613	glr-2	0	0	0	0
WBGene00001614	glr-3	0	0	0	0
WBGene00001615	glr-4	1	0	0	0
WBGene00001616	glr-5	0	0	0	0
WBGene00001617	glr-6	0	3	0	0
WBGene00001619	glr-8	0	0	0	0
WBGene00001620	glt-1	5	5	0	0
WBGene00001621	glt-3	0	0	0	0
WBGene00001622	glt-4	0	0	0	0
WBGene00001623	glt-5	0	0	0	0
WBGene00001624	glt-6	0	0	0	0
WBGene00001625	glt-7	0	0	0	0
WBGene00001627	gly-2	0	0	0	0
WBGene00001628	gly-3	3	1	0	0
WBGene00001629	gly-4	0	0	0	0
WBGene00001630	gly-5	3	0	0	0
WBGene00001631	gly-6	0	8	0	0
WBGene00001632	gly-7	4	0	0	0
WBGene00001633	gly-8	0	0	0	0
WBGene00001635	gly-10	0	1	0	0
WBGene00001636	gly-11	0	0	0	0
WBGene00001637	gly-12	0	0	0	0
WBGene00001638	gly-13	2	6	0	0
WBGene00001639	gly-14	0	0	0	0
WBGene00001640	gly-15	0	0	0	0
WBGene00001643	gly-18	0	0	0	0
WBGene00001644	gly-19	0	0	0	0
WBGene00001645	gly-20	0	0	0	0
WBGene00001646	gna-1	0	0	0	0
WBGene00001647	gna-2	0	0	0	0
WBGene00001648	goa-1	10	7	11	0
WBGene00001649	gob-1	0	0	2	0
WBGene00001650	gon-1	1	11	0	8
WBGene00001651	gon-2	0	0	0	0
WBGene00001653	gon-4	0	0	0	0
WBGene00001660	gop-1	0	0	0	0
WBGene00001661	gop-2	0	0	0	0
WBGene00001662	gop-3	1	0	0	3
WBGene00001663	gpa-1	0	0	0	0
WBGene00001664	gpa-2	0	0	0	0
WBGene00001665	gpa-3	0	0	0	0
WBGene00001666	gpa-4	0	0	0	0
WBGene00001667	gpa-5	0	0	0	0
WBGene00001669	gpa-7	0	0	0	0
WBGene00001671	gpa-9	1	0	0	0
WBGene00001672	gpa-10	0	0	0	0
WBGene00001673	gpa-11	0	0	0	0
WBGene00001674	gpa-12	0	0	0	0
WBGene00001676	gpa-14	0	0	0	0
WBGene00001677	gpa-15	0	0	0	0
WBGene00001678	gpa-16	0	0	0	0
WBGene00001679	gpb-1	14	1	0	6
WBGene00001680	gpb-2	0	0	0	0
WBGene00001681	gpc-1	0	0	0	0
WBGene00001682	gpc-2	0	0	0	0
WBGene00001683	gpd-1	0	0	0	0
WBGene00001684	gpd-2	3	0	0	7
WBGene00001685	gpd-3	18	0	0	1
WBGene00001686	gpd-4	0	0	0	0
WBGene00001687	gpn-1	0	0	0	0
WBGene00001688	gpr-1	0	0	0	0
WBGene00001689	gpr-2	0	0	0	0
WBGene00001690	grd-1	0	4	0	0
WBGene00001692	grd-3	0	0	0	0
WBGene00001693	grd-4	0	0	0	0
WBGene00001694	grd-5	0	1	0	0
WBGene00001695	grd-6	0	0	0	0
WBGene00001696	grd-7	0	0	0	0
WBGene00001699	grd-10	0	0	0	0
WBGene00001702	grd-13	0	0	0	0
WBGene00001703	grd-14	0	0	0	0
WBGene00001704	grd-15	0	0	0	0
WBGene00001705	grd-16	0	0	0	0
WBGene00001706	grd-17	0	0	0	0
WBGene00001707	grh-1	0	0	0	0
WBGene00001708	grk-1	2	4	0	0
WBGene00001709	grk-2	0	0	0	0
WBGene00001710	grl-1	0	0	0	0
WBGene00001711	grl-2	0	0	0	0
WBGene00001712	grl-3	0	0	0	0
WBGene00001713	grl-4	0	0	0	0
WBGene00001714	grl-5	0	8	0	0
WBGene00001716	grl-7	0	14	0	0
WBGene00001717	grl-8	0	0	0	0
WBGene00001718	grl-9	0	0	0	0
WBGene00001719	grl-10	0	0	0	0
WBGene00001720	grl-11	0	0	0	0
WBGene00001721	grl-12	0	0	0	0
WBGene00001723	grl-14	0	0	0	0
WBGene00001724	grl-15	0	0	0	0
WBGene00001725	grl-16	0	8	0	0
WBGene00001727	grl-18	0	0	0	0
WBGene00001728	grl-19	0	0	0	0
WBGene00001730	grl-21	0	0	0	0
WBGene00001732	grl-23	0	0	0	0
WBGene00001735	grl-26	0	0	0	0
WBGene00001740	gro-1	0	0	0	0
WBGene00001743	grp-1	0	3	0	0
WBGene00001744	gars-1	0	0	0	0
WBGene00001745	gsa-1	2	0	5	1
WBGene00001746	gsk-3	2	2	0	0
WBGene00001747	gsp-1	0	8	0	0
WBGene00001748	gsp-2	0	5	0	0
WBGene00001749	gst-1	0	4	0	0
WBGene00001750	gst-2	0	0	0	0
WBGene00001751	gst-3	0	0	0	0
WBGene00001752	gst-4	0	0	0	0
WBGene00001753	gst-5	1	10	0	0
WBGene00001754	gst-6	0	0	0	0
WBGene00001755	gst-7	4	3	0	0
WBGene00001757	gst-9	0	0	0	0
WBGene00001758	gst-10	0	5	0	0
WBGene00001759	gst-11	0	0	0	0
WBGene00001760	gst-12	0	0	0	0
WBGene00001762	gst-14	0	0	0	0
WBGene00001763	gst-15	0	0	0	0
WBGene00001767	gst-19	0	0	0	0
WBGene00001768	gst-20	1	0	0	0
WBGene00001769	gst-21	0	0	0	0
WBGene00001770	gst-22	0	0	0	0
WBGene00001771	gst-23	0	0	0	0
WBGene00001772	gst-24	0	0	0	0
WBGene00001775	gst-27	0	4	0	0
WBGene00001777	gst-29	0	0	0	0
WBGene00001778	gst-30	0	0	0	0
WBGene00001779	gst-31	0	0	0	0
WBGene00001781	gst-33	0	0	0	0
WBGene00001783	gst-35	0	1	0	0
WBGene00001784	gst-36	0	0	1	0
WBGene00001787	gst-39	0	0	0	0
WBGene00001788	gst-40	2	0	0	0
WBGene00001789	gst-41	11	0	0	0
WBGene00001790	gst-42	0	2	0	0
WBGene00001791	gst-43	0	0	0	0
WBGene00001792	gst-44	0	0	0	0
WBGene00001793	gsy-1	4	1	0	0
WBGene00001794	gta-1	0	1	0	0
WBGene00001795	gtl-1	0	0	0	0
WBGene00001796	gtl-2	0	0	0	0
WBGene00001803	lite-1	0	0	0	0
WBGene00001804	gur-3	0	0	0	0
WBGene00001805	gur-4	0	0	0	0
WBGene00001808	gut-2	0	0	0	0
WBGene00001811	haf-1	0	0	0	0
WBGene00001812	haf-2	0	2	0	0
WBGene00001813	haf-3	0	0	0	0
WBGene00001814	haf-4	0	0	3	0
WBGene00001815	hmt-1	0	3	0	0
WBGene00001816	haf-6	0	0	0	0
WBGene00001817	haf-7	0	0	10	0
WBGene00001819	haf-9	0	3	0	0
WBGene00001820	ham-1	0	0	0	0
WBGene00001821	ham-2	0	0	0	0
WBGene00001823	hap-1	0	3	0	2
WBGene00001824	hbl-1	0	0	0	0
WBGene00001827	hcf-1	0	0	0	0
WBGene00001828	hch-1	0	0	0	0
WBGene00001829	hcp-1	0	0	2	0
WBGene00001830	hcp-2	0	0	0	0
WBGene00001831	hcp-3	0	0	0	0
WBGene00001832	hcp-4	0	0	0	0
WBGene00001833	hcp-6	0	0	0	2
WBGene00001834	hda-1	8	0	0	0
WBGene00001835	hda-2	0	1	0	1
WBGene00001836	hda-3	0	0	0	1
WBGene00001837	hda-4	0	2	0	0
WBGene00001838	hda-10	0	0	0	0
WBGene00001839	hdl-1	0	0	0	0
WBGene00001840	hel-1	1	0	0	0
WBGene00001841	hen-1	0	0	0	0
WBGene00001843	hgo-1	2	0	0	0
WBGene00001844	hid-1	0	0	0	0
WBGene00001851	hif-1	15	4	0	0
WBGene00001852	hil-1	0	0	0	0
WBGene00001853	hil-2	0	5	0	0
WBGene00001854	hil-3	0	0	0	0
WBGene00001855	hil-4	0	0	0	0
WBGene00001856	hil-5	0	0	0	0
WBGene00001857	hil-6	0	0	0	0
WBGene00001858	hil-7	0	1	0	0
WBGene00001860	him-1	0	8	0	0
WBGene00001862	him-3	0	0	0	0
WBGene00001863	him-4	5	4	0	0
WBGene00001864	him-5	0	0	0	0
WBGene00001865	him-6	0	0	0	0
WBGene00001867	him-8	0	0	0	0
WBGene00001869	him-10	0	0	0	0
WBGene00001872	him-14	0	0	0	0
WBGene00001874	him-17	0	0	0	0
WBGene00001875	his-1	0	1	0	0
WBGene00001876	his-2	0	0	0	0
WBGene00001877	his-3	0	0	0	0
WBGene00001878	his-4	0	0	0	0
WBGene00001879	his-5	0	0	0	0
WBGene00001880	his-6	0	0	0	0
WBGene00001881	his-7	0	0	0	0
WBGene00001882	his-8	0	0	0	0
WBGene00001883	his-9	0	0	0	0
WBGene00001884	his-10	0	2	0	1
WBGene00001885	his-11	0	0	0	0
WBGene00001886	his-12	0	0	0	0
WBGene00001887	his-13	0	0	0	0
WBGene00001888	his-14	0	1	0	0
WBGene00001889	his-15	0	5	0	1
WBGene00001890	his-16	0	0	0	0
WBGene00001891	his-17	0	6	0	0
WBGene00001892	his-18	0	0	0	0
WBGene00001893	his-19	0	0	0	3
WBGene00001895	his-21	0	0	0	3
WBGene00001896	his-22	0	0	0	4
WBGene00001898	his-24	2	0	0	0
WBGene00001899	his-25	0	0	0	0
WBGene00001900	his-26	0	0	0	0
WBGene00001901	his-27	0	0	0	0
WBGene00001902	his-28	0	1	0	0
WBGene00001903	his-29	0	0	0	0
WBGene00001904	his-30	0	0	0	0
WBGene00001905	his-31	0	0	0	0
WBGene00001906	his-32	0	0	0	0
WBGene00001907	his-33	0	0	0	0
WBGene00001909	his-35	2	0	5	0
WBGene00001910	C50F4.6	0	0	0	0
WBGene00001911	his-37	1	2	0	0
WBGene00001912	his-38	0	0	0	0
WBGene00001914	his-40	0	0	0	0
WBGene00001915	his-41	0	1	0	0
WBGene00001916	his-42	0	0	0	0
WBGene00001917	his-43	0	0	0	0
WBGene00001918	his-44	0	0	0	0
WBGene00001919	his-45	0	1	0	0
WBGene00001920	his-46	0	0	0	0
WBGene00001921	his-47	0	0	0	0
WBGene00001922	his-48	0	3	0	5
WBGene00001923	his-49	0	0	0	0
WBGene00001924	his-50	0	0	0	0
WBGene00001925	his-51	0	0	0	0
WBGene00001929	his-55	0	0	0	0
WBGene00001930	his-56	0	2	0	2
WBGene00001931	his-57	0	1	0	0
WBGene00001932	his-58	0	2	0	2
WBGene00001933	his-59	0	0	0	0
WBGene00001934	his-60	0	2	0	0
WBGene00001935	his-61	0	4	0	2
WBGene00001936	his-62	0	3	0	2
WBGene00001937	his-63	0	0	0	0
WBGene00001938	his-64	0	0	0	0
WBGene00001939	his-65	0	0	0	4
WBGene00001940	his-66	0	0	0	2
WBGene00001941	his-67	0	0	0	0
WBGene00001942	his-68	0	0	0	0
WBGene00001944	his-70	0	0	0	0
WBGene00001945	his-71	0	0	0	0
WBGene00001946	his-72	0	0	5	0
WBGene00001947	his-73	0	0	0	0
WBGene00001948	hlh-1	0	0	0	0
WBGene00001949	hlh-2	0	0	0	4
WBGene00001950	hlh-3	0	0	0	0
WBGene00001951	hlh-4	0	0	0	0
WBGene00001952	hlh-6	0	0	0	0
WBGene00001953	hlh-8	0	0	1	1
WBGene00001954	hlh-10	0	0	0	1
WBGene00001955	hlh-11	7	2	0	6
WBGene00001957	hlh-13	0	0	0	0
WBGene00001960	hlh-16	0	0	0	0
WBGene00001963	btb-1	0	0	0	0
WBGene00001971	hmg-1.1	13	6	0	18
WBGene00001972	hmg-1.2	14	7	3	0
WBGene00001973	hmg-3	0	2	0	0
WBGene00001974	hmg-4	6	2	2	2
WBGene00001975	hmg-5	0	0	0	0
WBGene00001976	hmg-11	0	0	0	0
WBGene00001977	hmg-12	0	0	0	0
WBGene00001978	hmp-1	1	9	0	5
WBGene00001979	hmp-2	0	0	0	0
WBGene00001980	hmr-1	5	13	0	0
WBGene00001983	hoe-1	0	5	0	2
WBGene00001984	hog-1	0	0	0	0
WBGene00001985	hop-1	0	0	0	0
WBGene00001986	hot-1	0	0	4	0
WBGene00001987	hot-2	0	0	0	0
WBGene00001988	hot-3	0	0	0	0
WBGene00001989	hot-4	0	0	0	0
WBGene00001990	hot-5	0	0	0	0
WBGene00001991	hot-6	0	0	0	0
WBGene00001993	hpd-1	0	0	0	0
WBGene00001994	hpk-1	14	7	0	0
WBGene00001995	hpl-1	0	0	0	0
WBGene00001996	hpl-2	0	0	0	0
WBGene00001997	hpr-9	0	0	0	0
WBGene00001998	hpr-17	0	0	0	0
WBGene00001999	hrp-1	6	12	0	1
WBGene00002000	hrp-2	0	5	6	1
WBGene00002001	hars-1	0	0	0	0
WBGene00002002	hsb-1	0	0	0	0
WBGene00002003	hse-5	0	1	0	0
WBGene00002004	hsf-1	1	0	0	0
WBGene00002005	hsp-1	42	11	12	0
WBGene00002007	hsp-3	30	13	1	6
WBGene00002008	hsp-4	2	7	0	0
WBGene00002010	hsp-6	20	8	0	0
WBGene00002011	hsp-12.2	11	0	0	0
WBGene00002012	hsp-12.3	0	0	0	0
WBGene00002013	hsp-12.6	0	0	0	0
WBGene00002015	hsp-16.1	41	12	7	0
WBGene00002016	hsp-16.2	23	1	0	0
WBGene00002017	hsp-16.11	9	1	5	0
WBGene00002018	hsp-16.41	10	3	0	0
WBGene00002019	hsp-16.48	27	7	0	3
WBGene00002020	hsp-16.49	55	12	4	0
WBGene00002021	hsp-17	18	0	0	0
WBGene00002023	hsp-25	0	10	0	0
WBGene00002024	hsp-43	4	4	0	0
WBGene00002025	hsp-60	9	7	0	0
WBGene00002026	hsp-70	5	3	1	0
WBGene00002027	hsr-9	0	8	0	0
WBGene00002028	hst-1	0	0	0	0
WBGene00002029	hst-2	0	0	0	0
WBGene00002030	hst-3.1	0	0	0	0
WBGene00002031	hst-6	0	0	0	0
WBGene00002032	htp-1	0	0	0	0
WBGene00002033	htp-2	0	0	0	0
WBGene00002034	htp-3	0	0	0	0
WBGene00002035	hum-1	0	0	5	6
WBGene00002036	hum-2	0	6	0	4
WBGene00002037	hum-4	0	3	0	0
WBGene00002038	hum-5	0	0	5	0
WBGene00002039	hum-6	11	5	0	0
WBGene00002040	hum-7	0	0	0	0
WBGene00002041	hum-8	0	0	0	0
WBGene00002042	hus-1	0	0	0	0
WBGene00002043	hyl-1	0	0	0	0
WBGene00002044	hyl-2	0	0	0	0
WBGene00002045	icd-1	7	23	0	1
WBGene00002046	icln-1	0	0	0	0
WBGene00002047	icp-1	0	0	0	0
WBGene00002048	ida-1	4	1	0	0
WBGene00002050	ifa-1	35	0	0	0
WBGene00002051	ifa-3	0	0	0	0
WBGene00002052	ifa-4	0	0	0	0
WBGene00002053	ifb-1	94	5	9	0
WBGene00002054	ifb-2	0	0	0	0
WBGene00002055	ifc-1	0	0	0	0
WBGene00002056	ifc-2	0	0	2	0
WBGene00002057	ifd-1	0	0	0	0
WBGene00002058	ifd-2	0	0	1	0
WBGene00002059	ife-1	0	9	0	0
WBGene00002060	ife-2	0	2	0	0
WBGene00002061	ife-3	0	0	0	0
WBGene00002062	ife-4	0	0	0	0
WBGene00002063	ife-5	0	0	0	0
WBGene00002064	iff-1	0	0	0	0
WBGene00002065	iff-2	3	6	0	2
WBGene00002066	ifg-1	6	8	0	0
WBGene00002067	ifp-1	0	0	3	0
WBGene00002068	ify-1	0	0	0	0
WBGene00002069	ikb-1	0	0	0	0
WBGene00002070	ile-1	1	9	0	0
WBGene00002071	ile-2	0	0	0	0
WBGene00002072	ima-1	0	0	0	0
WBGene00002073	ima-2	0	0	0	1
WBGene00002074	ima-3	1	1	4	8
WBGene00002075	imb-1	0	0	0	1
WBGene00002076	imb-2	10	0	0	0
WBGene00002077	imb-3	0	1	0	7
WBGene00002078	xpo-1	0	6	7	3
WBGene00002079	xpo-2	0	3	0	3
WBGene00002080	xpo-3	0	2	0	0
WBGene00002081	ina-1	0	0	0	0
WBGene00002083	inf-1	2	4	0	0
WBGene00002084	ins-1	0	0	0	0
WBGene00002086	ins-3	0	0	0	0
WBGene00002087	ins-4	0	0	0	0
WBGene00002089	ins-6	0	0	0	0
WBGene00002093	ins-10	0	0	0	0
WBGene00002094	ins-11	0	0	0	0
WBGene00002096	ins-13	0	0	0	0
WBGene00002097	ins-14	0	0	0	0
WBGene00002098	ins-15	0	0	0	0
WBGene00002099	ins-16	0	0	0	0
WBGene00002100	ins-17	0	0	0	0
WBGene00002101	ins-18	0	0	7	0
WBGene00002107	ins-24	0	0	0	0
WBGene00002108	ins-25	0	0	0	0
WBGene00002109	ins-26	0	0	0	0
WBGene00002110	ins-27	0	0	0	0
WBGene00002111	ins-28	0	0	0	0
WBGene00002112	ins-29	0	0	0	0
WBGene00002113	ins-30	0	0	2	0
WBGene00002116	ins-33	0	0	0	0
WBGene00002118	ins-35	0	0	0	0
WBGene00002119	ins-36	0	0	0	0
WBGene00002120	ins-37	0	0	0	0
WBGene00002123	inx-1	3	0	0	0
WBGene00002124	inx-2	0	0	0	0
WBGene00002125	inx-3	0	0	0	6
WBGene00002127	inx-5	0	3	0	0
WBGene00002128	inx-6	2	0	0	0
WBGene00002129	inx-7	0	0	0	0
WBGene00002130	inx-8	0	0	0	0
WBGene00002131	inx-9	0	0	0	0
WBGene00002132	inx-10	1	0	0	0
WBGene00002133	inx-11	0	0	0	0
WBGene00002134	inx-12	2	4	2	0
WBGene00002135	inx-13	2	4	0	0
WBGene00002136	inx-14	0	0	0	0
WBGene00002137	inx-15	0	0	0	0
WBGene00002138	inx-16	0	0	0	0
WBGene00002139	inx-17	0	0	0	0
WBGene00002140	inx-18	0	0	0	0
WBGene00002141	inx-19	0	0	0	0
WBGene00002142	inx-20	0	0	0	0
WBGene00002143	inx-21	0	2	0	0
WBGene00002144	inx-22	0	0	0	0
WBGene00002146	ipp-5	0	0	0	0
WBGene00002147	ire-1	0	0	0	0
WBGene00002148	gon-14	0	0	0	2
WBGene00002149	irk-1	0	0	0	0
WBGene00002150	irk-2	0	0	0	0
WBGene00002151	irk-3	0	0	0	0
WBGene00002152	iars-1	0	1	0	7
WBGene00002153	iars-2	6	2	0	0
WBGene00002162	isp-1	2	8	0	0
WBGene00002163	ist-1	0	3	0	0
WBGene00002169	isw-1	3	0	0	0
WBGene00002173	itr-1	0	6	0	0
WBGene00002174	itx-1	0	0	3	0
WBGene00002175	jac-1	0	0	0	8
WBGene00002176	jip-1	2	2	0	0
WBGene00002177	jkk-1	0	0	0	0
WBGene00002178	jnk-1	0	0	0	0
WBGene00002179	jph-1	7	0	2	4
WBGene00002180	jtr-1	0	0	0	0
WBGene00002181	kal-1	3	4	0	0
WBGene00002182	kap-1	0	0	0	0
WBGene00002183	kat-1	2	0	0	0
WBGene00002184	kel-1	0	0	0	0
WBGene00002185	kel-3	1	0	0	0
WBGene00002186	kel-10	0	0	0	0
WBGene00002187	kgb-1	0	0	0	0
WBGene00002189	kin-1	18	10	7	0
WBGene00002190	kin-2	3	1	0	0
WBGene00002191	kin-3	4	8	4	0
WBGene00002192	kin-4	7	0	0	0
WBGene00002193	kin-5	0	0	0	0
WBGene00002194	kin-6	0	0	0	0
WBGene00002195	kin-9	1	0	0	0
WBGene00002196	kin-10	2	0	0	0
WBGene00002198	kin-14	1	0	0	0
WBGene00002199	kin-15	0	0	0	0
WBGene00002200	kin-16	0	0	0	0
WBGene00002201	kin-18	1	3	0	0
WBGene00002202	kin-19	10	13	0	0
WBGene00002203	kin-20	6	1	0	0
WBGene00002204	kin-21	0	0	0	0
WBGene00002205	kin-23	0	0	0	0
WBGene00002206	kin-24	0	0	0	0
WBGene00002207	sid-3	1	0	0	0
WBGene00002208	kin-26	0	0	0	0
WBGene00002210	kin-29	3	0	1	0
WBGene00002211	kin-30	4	0	0	0
WBGene00002212	kin-31	0	0	0	0
WBGene00002213	kin-32	0	0	0	1
WBGene00002214	klc-1	0	0	0	0
WBGene00002215	klc-2	3	3	0	0
WBGene00002216	klp-3	0	0	0	0
WBGene00002217	klp-4	5	0	0	0
WBGene00002218	klp-6	0	0	0	0
WBGene00002219	klp-7	4	0	0	0
WBGene00002220	gcc-1	0	0	0	0
WBGene00002221	klp-10	0	0	0	0
WBGene00002222	klp-11	1	0	0	2
WBGene00002223	klp-12	10	8	0	0
WBGene00002224	klp-13	0	0	0	0
WBGene00002225	klp-15	0	0	0	0
WBGene00002226	klp-16	0	0	0	0
WBGene00002227	klp-17	0	0	0	0
WBGene00002228	klp-18	0	0	0	2
WBGene00002229	klp-19	0	7	1	0
WBGene00002230	klp-20	0	1	0	0
WBGene00002231	knl-1	0	0	0	3
WBGene00002232	kpc-1	5	1	0	0
WBGene00002233	kqt-1	6	0	0	0
WBGene00002234	kqt-2	0	0	0	0
WBGene00002235	kqt-3	0	0	0	0
WBGene00002238	kars-1	1	3	0	0
WBGene00002239	ksr-1	0	0	0	0
WBGene00002240	ksr-2	0	0	0	0
WBGene00002241	kup-1	0	0	0	0
WBGene00002242	kvs-1	0	0	0	0
WBGene00002243	lad-2	0	0	0	0
WBGene00002244	laf-1	0	7	0	3
WBGene00002245	lag-1	0	0	0	0
WBGene00002246	lag-2	0	0	0	0
WBGene00002247	lam-1	7	7	0	17
WBGene00002248	lam-3	0	0	0	0
WBGene00002249	lap-1	2	0	0	0
WBGene00002250	lap-2	3	4	0	0
WBGene00002251	lat-1	0	2	0	0
WBGene00002252	lat-2	0	0	0	0
WBGene00002253	lbp-1	0	0	0	0
WBGene00002254	lbp-2	0	11	0	1
WBGene00002255	lbp-3	0	3	0	0
WBGene00002256	lbp-4	0	0	0	0
WBGene00002257	lbp-5	2	0	0	0
WBGene00002258	lbp-6	0	3	0	0
WBGene00002259	lbp-7	0	0	0	0
WBGene00002261	ldb-1	7	0	10	0
WBGene00002262	ldh-1	0	0	0	0
WBGene00002263	lea-1	6	38	1	4
WBGene00002264	lec-1	10	3	2	0
WBGene00002265	lec-2	0	0	0	0
WBGene00002266	lec-3	2	0	0	0
WBGene00002267	lec-4	0	0	0	0
WBGene00002268	lec-5	0	0	0	0
WBGene00002269	lec-6	0	5	0	0
WBGene00002270	lec-7	6	0	0	0
WBGene00002271	lec-8	0	1	0	0
WBGene00002272	lec-9	0	0	4	0
WBGene00002273	lec-10	0	0	0	0
WBGene00002274	lec-11	0	0	0	0
WBGene00002275	lem-2	0	0	0	0
WBGene00002276	lem-3	0	0	0	0
WBGene00002278	lep-2	1	0	0	0
WBGene00002280	let-2	23	32	0	2
WBGene00002282	let-4	0	0	0	0
WBGene00002295	let-19	14	3	0	1
WBGene00002297	ect-2	0	1	0	4
WBGene00002299	let-23	0	0	0	0
WBGene00002324	let-49	0	0	0	0
WBGene00002335	let-60	13	13	0	0
WBGene00002344	let-70	1	0	0	0
WBGene00002348	myo-1	61	2	1	1
WBGene00002363	let-92	0	0	0	2
WBGene00002368	let-99	0	0	0	0
WBGene00002393	lpr-1	0	0	0	0
WBGene00002497	let-268	0	0	0	0
WBGene00002583	let-363	12	10	0	0
WBGene00002601	let-381	0	0	0	0
WBGene00002632	let-413	10	2	0	0
WBGene00002637	let-418	2	4	0	7
WBGene00002694	let-502	0	0	0	0
WBGene00002696	let-504	0	1	0	0
WBGene00002717	let-526	9	0	0	6
WBGene00002783	let-607	13	4	0	0
WBGene00002804	let-630	3	9	0	1
WBGene00002827	let-653	0	0	0	0
WBGene00002845	let-711	1	2	0	6
WBGene00002850	let-716	0	5	0	0
WBGene00002855	let-721	0	4	0	0
WBGene00002879	let-754	0	0	0	0
WBGene00002881	let-756	3	0	0	0
WBGene00002889	let-765	1	0	1	1
WBGene00002891	let-767	0	0	0	0
WBGene00002915	let-805	16	5	3	0
WBGene00002957	let-858	8	14	0	0
WBGene00002974	lev-1	0	0	0	0
WBGene00002975	lev-8	0	0	0	0
WBGene00002976	lev-9	0	0	0	0
WBGene00002977	lev-10	0	0	0	0
WBGene00002978	lev-11	38	27	3	0
WBGene00002979	lfe-2	1	0	0	0
WBGene00002980	lgg-1	5	5	0	2
WBGene00002981	lgg-2	0	0	0	0
WBGene00002982	lgg-3	0	0	0	0
WBGene00002983	lgx-1	0	0	0	0
WBGene00002985	lig-1	0	0	0	0
WBGene00002986	lig-4	0	0	0	0
WBGene00002987	lim-4	0	0	0	0
WBGene00002988	lim-6	0	0	0	0
WBGene00002989	lim-7	2	0	0	0
WBGene00002990	lin-1	0	4	0	2
WBGene00002991	lin-2	0	0	0	0
WBGene00002992	lin-3	16	0	0	0
WBGene00002994	lin-5	0	0	0	2
WBGene00002996	lin-7	0	0	0	0
WBGene00002997	lin-8	0	0	0	0
WBGene00002998	lin-9	0	0	0	1
WBGene00002999	lin-10	4	0	0	0
WBGene00003000	lin-11	0	0	0	0
WBGene00003001	lin-12	0	1	0	3
WBGene00003002	lin-13	10	11	0	2
WBGene00003003	lin-14	3	0	0	0
WBGene00003006	lin-17	0	0	0	0
WBGene00003007	lin-18	0	0	0	0
WBGene00003008	lin-22	0	0	0	0
WBGene00003009	lin-23	5	0	3	0
WBGene00003010	lin-24	0	0	0	0
WBGene00003011	lin-25	0	0	0	0
WBGene00003012	lin-26	0	0	0	1
WBGene00003014	lin-28	0	0	0	0
WBGene00003015	lin-29	5	2	0	7
WBGene00003017	lin-31	0	0	0	0
WBGene00003019	lin-33	4	0	0	0
WBGene00003020	lin-35	4	0	0	0
WBGene00003021	lin-36	0	0	0	0
WBGene00003022	lin-37	0	0	0	0
WBGene00003024	lin-39	0	0	0	0
WBGene00003025	lin-40	4	0	0	2
WBGene00003026	lin-41	5	0	0	0
WBGene00003029	lin-44	0	0	0	0
WBGene00003030	lin-45	9	0	0	0
WBGene00003031	lin-46	0	6	0	0
WBGene00003033	lin-48	1	0	0	0
WBGene00003034	lin-49	0	0	0	0
WBGene00003035	lin-52	0	0	0	0
WBGene00003036	lin-53	7	6	0	0
WBGene00003037	lin-54	0	0	0	0
WBGene00003038	lin-56	0	0	0	0
WBGene00003040	lin-59	2	1	0	2
WBGene00003041	lin-61	0	0	0	0
WBGene00003043	lip-1	17	1	0	0
WBGene00003044	lir-1	0	0	0	0
WBGene00003045	lir-2	2	0	0	0
WBGene00003046	lir-3	0	0	0	0
WBGene00003047	lis-1	1	10	0	4
WBGene00003048	lit-1	6	0	2	4
WBGene00003052	lmn-1	0	9	0	0
WBGene00003053	lmp-1	0	8	0	0
WBGene00003055	lon-1	1	0	0	0
WBGene00003056	lon-2	0	0	0	0
WBGene00003057	lon-3	0	8	0	0
WBGene00003058	lov-1	0	0	0	0
WBGene00003059	lpd-2	0	0	0	0
WBGene00003060	lpd-3	8	10	9	0
WBGene00003061	lpd-5	1	0	0	0
WBGene00003062	lpd-6	0	0	0	0
WBGene00003063	lpd-7	0	0	0	5
WBGene00003064	lpd-8	7	0	0	0
WBGene00003065	lpd-9	0	1	0	0
WBGene00003066	lpl-1	0	0	0	0
WBGene00003067	lrg-1	0	0	0	0
WBGene00003068	lrk-1	0	1	0	0
WBGene00003071	lrp-1	8	9	0	0
WBGene00003072	lrp-2	2	0	0	17
WBGene00003073	lars-1	3	8	0	4
WBGene00003074	lars-2	0	0	0	1
WBGene00003075	lrx-1	0	0	0	0
WBGene00003076	lsm-1	0	0	0	0
WBGene00003077	lsm-3	0	0	0	0
WBGene00003078	lsm-4	0	0	0	0
WBGene00003079	lsm-5	0	0	0	0
WBGene00003080	lsm-6	0	0	0	0
WBGene00003081	lsm-7	0	0	0	0
WBGene00003082	lsm-8	0	0	0	7
WBGene00003083	lst-1	0	0	0	0
WBGene00003084	lst-2	0	3	0	0
WBGene00003085	ccar-1	6	6	0	9
WBGene00003086	lst-4	3	1	0	0
WBGene00003087	lsy-2	0	0	0	0
WBGene00003089	ltd-1	6	0	0	0
WBGene00003090	lys-1	0	13	0	0
WBGene00003091	lys-2	0	0	0	0
WBGene00003092	lys-3	0	0	0	0
WBGene00003093	lys-4	0	1	0	0
WBGene00003094	lys-5	0	0	0	0
WBGene00003095	lys-6	0	0	0	0
WBGene00003096	lys-7	0	5	0	0
WBGene00003097	lys-8	0	19	0	0
WBGene00003100	mab-3	0	0	0	0
WBGene00003102	mab-5	0	4	0	2
WBGene00003104	mab-7	0	0	0	0
WBGene00003106	mab-9	0	0	0	0
WBGene00003107	mab-10	0	0	0	7
WBGene00003111	mab-20	0	0	0	0
WBGene00003112	mab-21	0	0	0	0
WBGene00003114	mab-23	0	0	0	0
WBGene00003119	mac-1	0	0	0	3
WBGene00003123	mag-1	0	3	0	0
WBGene00003124	mai-1	0	0	0	0
WBGene00003129	map-1	0	0	0	0
WBGene00003130	map-2	0	0	0	0
WBGene00003132	mat-1	0	0	0	0
WBGene00003133	mat-2	0	2	0	0
WBGene00003134	mat-3	0	0	0	0
WBGene00003136	mau-2	0	0	0	0
WBGene00003142	mau-8	0	1	0	0
WBGene00003143	max-1	0	0	1	0
WBGene00003144	max-2	0	0	4	5
WBGene00003148	mbf-1	4	0	0	0
WBGene00003149	mbk-1	0	0	0	0
WBGene00003150	mbk-2	9	3	4	3
WBGene00003151	mca-1	0	0	0	0
WBGene00003153	mca-3	4	17	0	3
WBGene00003154	mcm-2	0	0	1	0
WBGene00003155	mcm-3	0	0	0	0
WBGene00003156	mcm-4	0	0	0	0
WBGene00003157	mcm-5	0	3	0	0
WBGene00003158	mcm-6	0	4	0	1
WBGene00003159	mcm-7	0	0	0	0
WBGene00003160	mdf-1	0	0	0	0
WBGene00003161	mdf-2	0	0	0	0
WBGene00003162	mdh-2	10	0	0	1
WBGene00003163	mdl-1	30	8	2	0
WBGene00003164	mdt-6	0	0	0	0
WBGene00003165	mec-1	0	0	0	0
WBGene00003166	mec-2	2	0	0	0
WBGene00003167	mec-3	0	0	0	0
WBGene00003168	mec-4	0	0	0	0
WBGene00003169	mec-5	0	0	0	0
WBGene00003170	mec-6	0	0	0	0
WBGene00003171	mec-7	0	1	0	0
WBGene00003172	mec-8	2	4	0	5
WBGene00003173	mec-9	0	0	0	0
WBGene00003174	mec-10	0	0	0	0
WBGene00003175	mec-12	0	0	0	0
WBGene00003176	mec-14	0	0	0	0
WBGene00003177	mec-15	0	0	0	0
WBGene00003178	mec-17	0	0	0	0
WBGene00003179	mec-18	0	0	0	0
WBGene00003181	med-2	0	0	0	0
WBGene00003182	mef-2	0	0	0	0
WBGene00003183	mei-1	0	0	0	0
WBGene00003184	mei-2	0	2	0	0
WBGene00003185	mek-1	4	9	0	0
WBGene00003186	mek-2	5	0	0	0
WBGene00003196	mel-11	3	0	0	6
WBGene00003209	mel-26	8	1	5	0
WBGene00003210	mel-28	0	1	0	3
WBGene00003214	mel-32	0	4	0	0
WBGene00003216	mel-43	0	6	0	0
WBGene00003218	mep-1	9	2	0	3
WBGene00003219	mes-1	0	0	0	0
WBGene00003220	mes-2	0	3	0	0
WBGene00003221	mes-3	0	0	0	3
WBGene00003222	mes-4	0	4	0	4
WBGene00003224	mes-6	0	0	0	0
WBGene00003225	mev-1	2	0	0	0
WBGene00003228	mex-1	0	0	0	0
WBGene00003229	mex-3	4	0	0	0
WBGene00003230	mex-5	0	1	0	0
WBGene00003231	mex-6	0	0	0	0
WBGene00003232	mgl-1	0	0	0	0
WBGene00003233	mgl-2	1	0	0	0
WBGene00003234	mif-1	0	0	0	0
WBGene00003235	mif-2	0	0	0	0
WBGene00003236	mif-3	1	0	0	0
WBGene00003237	mif-4	0	0	0	0
WBGene00003238	mig-1	0	0	0	0
WBGene00003239	mig-2	0	3	0	0
WBGene00003241	mig-5	1	0	0	4
WBGene00003242	mig-6	13	14	0	33
WBGene00003243	mig-10	0	2	0	0
WBGene00003245	mig-13	0	0	0	0
WBGene00003246	mig-14	0	0	0	3
WBGene00003247	mig-15	8	7	0	6
WBGene00003248	mig-17	0	0	0	0
WBGene00003249	mig-18	0	0	0	0
WBGene00003252	mig-21	0	0	0	0
WBGene00003253	mig-22	0	1	0	0
WBGene00003254	mig-23	0	0	0	0
WBGene00003258	cogc-1	0	0	0	0
WBGene00003262	mir-34	0	0	0	0
WBGene00003272	mir-44	0	0	0	0
WBGene00003275	mir-47	0	0	0	0
WBGene00003279	mir-51	0	0	0	0
WBGene00003281	mir-53	0	0	0	0
WBGene00003283	mir-55	0	0	0	0
WBGene00003284	mir-56	0	0	0	0
WBGene00003289	mir-61	0	0	0	0
WBGene00003300	mir-72	0	0	0	0
WBGene00003309	mir-81	0	0	0	0
WBGene00003312	mir-84	0	0	0	0
WBGene00003323	mir-230	0	0	0	0
WBGene00003333	mir-239.2	0	0	0	0
WBGene00003335	mir-241	0	0	0	0
WBGene00003339	mir-245	0	0	0	0
WBGene00003340	mir-246	0	0	0	0
WBGene00003349	mir-255	0	0	0	0
WBGene00003351	mir-257	0	0	0	0
WBGene00003352	mir-258.1	0	0	0	0
WBGene00003357	mir-264	0	0	0	0
WBGene00003367	mix-1	2	5	0	3
WBGene00003368	mkk-4	1	0	0	0
WBGene00003369	mlc-1	21	0	0	0
WBGene00003370	mlc-2	2	0	0	0
WBGene00003371	mlc-3	26	18	0	0
WBGene00003372	mlc-4	0	4	0	0
WBGene00003373	mlh-1	0	0	0	0
WBGene00003374	mlk-1	1	1	0	0
WBGene00003375	mlp-1	0	0	0	0
WBGene00003376	mls-1	0	0	0	0
WBGene00003377	mls-2	0	0	0	0
WBGene00003378	mml-1	1	8	0	2
WBGene00003380	mnm-2	0	0	0	0
WBGene00003384	moc-1	0	0	0	0
WBGene00003385	moc-2	0	0	0	0
WBGene00003386	mod-1	3	0	0	0
WBGene00003387	mod-5	0	0	0	0
WBGene00003388	moe-3	0	0	0	0
WBGene00003389	mog-1	3	0	0	0
WBGene00003390	mog-2	1	0	0	0
WBGene00003391	mog-3	0	3	0	0
WBGene00003392	mog-4	0	0	0	10
WBGene00003393	mog-5	0	0	0	4
WBGene00003394	mom-1	0	0	0	0
WBGene00003395	mom-2	0	0	0	0
WBGene00003396	mom-4	0	0	0	0
WBGene00003397	mom-5	0	0	0	0
WBGene00003400	dapk-1	2	1	0	0
WBGene00003401	mpk-1	3	10	0	0
WBGene00003402	mpk-2	0	0	0	0
WBGene00003403	mps-1	0	0	0	0
WBGene00003404	mpz-1	4	0	0	1
WBGene00003405	mre-11	0	0	0	0
WBGene00003406	mrg-1	2	0	0	0
WBGene00003407	mrp-1	3	0	0	0
WBGene00003408	mrp-2	12	5	0	0
WBGene00003409	mrp-3	0	0	0	0
WBGene00003410	mrp-4	0	0	0	0
WBGene00003411	mrp-5	0	0	0	1
WBGene00003412	mrp-6	0	0	0	0
WBGene00003413	mrp-7	0	0	0	0
WBGene00003414	mrp-8	0	0	0	0
WBGene00003415	mars-1	0	2	0	3
WBGene00003417	mrt-2	0	0	0	0
WBGene00003418	msh-2	0	5	0	0
WBGene00003420	msh-4	0	0	0	3
WBGene00003421	msh-5	0	0	0	0
WBGene00003422	msh-6	0	2	1	0
WBGene00003423	msi-1	0	0	0	4
WBGene00003424	msp-3	0	0	0	0
WBGene00003425	msp-10	0	0	0	0
WBGene00003426	msp-19	0	0	0	0
WBGene00003430	msp-32	0	0	0	0
WBGene00003431	msp-33	0	0	0	0
WBGene00003432	msp-36	0	0	0	0
WBGene00003434	msp-38	0	0	0	0
WBGene00003435	msp-40	0	0	0	0
WBGene00003442	msp-49	0	0	0	0
WBGene00003443	msp-50	0	0	0	0
WBGene00003444	msp-51	0	0	0	0
WBGene00003445	msp-52	0	0	0	0
WBGene00003446	msp-53	0	0	0	0
WBGene00003448	msp-55	0	0	0	0
WBGene00003449	msp-56	0	0	0	0
WBGene00003450	msp-57	0	0	0	0
WBGene00003451	msp-58	0	0	0	0
WBGene00003452	msp-59	0	0	0	0
WBGene00003456	msp-63	0	0	0	0
WBGene00003457	msp-64	0	0	0	0
WBGene00003458	msp-65	0	0	0	0
WBGene00003460	msp-71	0	0	0	0
WBGene00003462	msp-74	0	0	0	0
WBGene00003463	msp-76	0	0	0	0
WBGene00003464	msp-77	0	0	0	0
WBGene00003465	msp-78	0	0	0	0
WBGene00003466	msp-79	0	0	0	0
WBGene00003467	msp-81	0	0	0	0
WBGene00003468	msp-113	0	0	0	0
WBGene00003469	msp-142	0	0	0	0
WBGene00003470	msp-152	0	0	0	0
[truncated: 16,815 more rows]

## Sheet: intestine-specific genes-2
Wormbase ID	Gene name	Average counts among seam cells	Average counts among intestinal cells
WBGene00000003	aat-2	0	0.7
WBGene00000016	abf-5	0	0.1
WBGene00000022	abt-4	0	2.4
WBGene00000036	ace-2	0	0.5
WBGene00000040	aco-1	0	1.1
WBGene00000051	acr-12	0	0.1
WBGene00000062	acr-23	0	0.1
WBGene00000068	acy-1	0	0.4
WBGene00000070	acy-3	0	0.3
WBGene00000071	acy-4	0	0.3
WBGene00000072	add-1	0	0.4
WBGene00000074	adm-2	0	0.5
WBGene00000081	ads-1	0	0.5
WBGene00000082	adt-1	0	0.3
WBGene00000092	ags-3	0	0.6
WBGene00000096	ahr-1	0	0.6
WBGene00000106	alg-2	0	0.7
WBGene00000118	alh-12	0	0.5
WBGene00000136	amt-4	0	0.7
WBGene00000137	amx-1	0	0.3
WBGene00000145	apc-11	0	0.1
WBGene00000146	ape-1	0	0.4
WBGene00000148	aph-2	0	0.6
WBGene00000155	app-1	0	0.4
WBGene00000156	apr-1	0	0.5
WBGene00000157	aps-2	0	0.3
WBGene00000161	apa-2	0	0.4
WBGene00000163	apb-3	0	0.3
WBGene00000164	apm-3	0	0.2
WBGene00000165	aps-3	0	0.3
WBGene00000173	aqp-5	0	0.1
WBGene00000198	art-1	0	1.4
WBGene00000200	arx-2	0	0.1
WBGene00000204	arx-6	0	0.6
WBGene00000206	asb-1	0	0.4
WBGene00000210	asg-2	0	1.5
WBGene00000215	asp-2	0	1.3
WBGene00000217	asp-4	0	1.2
WBGene00000222	atf-6	0	0.1
WBGene00000227	atm-1	0	0.4
WBGene00000240	pah-1	0	1
WBGene00000247	bec-1	0	0.8
WBGene00000253	bli-3	0	0.3
WBGene00000259	bpl-1	0	0.4
WBGene00000269	bre-4	0	0.2
WBGene00000271	brf-1	0	0.2
WBGene00000281	cah-3	0	0.6
WBGene00000282	cah-4	0	0.4
WBGene00000283	cah-5	0	0.1
WBGene00000286	cal-2	0	0.2
WBGene00000288	cal-4	0	0.9
WBGene00000294	cas-1	0	2.3
WBGene00000302	cav-2	0	0.4
WBGene00000369	ccf-1	0	0.1
WBGene00000371	cco-1	0	0.1
WBGene00000387	cdc-25.2	0	0.1
WBGene00000393	cdf-1	0	2.4
WBGene00000395	cdh-3	0	2.1
WBGene00000401	cdh-9	0	0.5
WBGene00000402	cdh-10	0	0.4
WBGene00000409	cdk-8	0	0.1
WBGene00000410	cdk-9	0	0.1
WBGene00000431	ceh-6	0	0.1
WBGene00000448	pros-1	0	0.7
WBGene00000454	ceh-33	0	0.2
WBGene00000463	ceh-43	0	0.3
WBGene00000466	cel-1	0	0.3
WBGene00000480	cgp-1	0	0.3
WBGene00000481	cha-1	0	0.1
WBGene00000493	che-14	0	0.7
WBGene00000502	chp-1	0	1.5
WBGene00000508	cit-1.2	0	0.1
WBGene00000510	cka-2	0	0.1
WBGene00000517	cki-2	0	0.2
WBGene00000520	cku-80	0	0.2
WBGene00000522	clc-1	0	0.3
WBGene00000524	clc-3	0	0.5
WBGene00000532	clh-5	0	0.2
WBGene00000535	cpi-1	0	0.7
WBGene00000565	cnt-1	0	0.1
WBGene00000585	cogc-2	0	0.6
WBGene00000591	coh-1	0	0.5
WBGene00000601	col-12	0	0.6
WBGene00000616	col-39	0	1.1
WBGene00000653	col-77	0	0.3
WBGene00000667	col-92	0	1.5
WBGene00000668	col-93	0	0.9
WBGene00000669	col-94	0	0.4
WBGene00000675	col-101	0	0.4
WBGene00000692	col-118	0	1
WBGene00000704	col-130	0	0.2
WBGene00000719	col-146	0	0.4
WBGene00000723	col-150	0	1
WBGene00000726	col-153	0	0.2
WBGene00000728	col-155	0	0.1
WBGene00000733	col-160	0	0.3
WBGene00000749	col-176	0	0.4
WBGene00000766	coq-6	0	0.3
WBGene00000773	cpf-1	0	0.5
WBGene00000783	cpr-3	0	0.2
WBGene00000784	cpr-4	0	0.4
WBGene00000789	cpz-2	0	4.6
WBGene00000796	crn-3	0	0.2
WBGene00000814	csn-2	0	0.4
WBGene00000822	csq-1	0	0.7
WBGene00000834	cua-1	0	1.4
WBGene00000836	cul-1	0	0.3
WBGene00000840	cul-5	0	0.3
WBGene00000841	cul-6	0	0.3
WBGene00000862	cwp-4	0	0.1
WBGene00000865	cyb-1	0	0.1
WBGene00000869	cyc-1	0	0.9
WBGene00000896	dad-1	0	0.1
WBGene00000897	daf-1	0	0.6
WBGene00000923	daf-31	0	0.2
WBGene00000933	dap-3	0	0.8
WBGene00000936	dbl-1	0	0.2
WBGene00000961	dgn-1	0	0.1
WBGene00000963	dhp-1	0	0.1
WBGene00000966	dhs-2	0	0.6
WBGene00000967	dhs-3	0	0.1
WBGene00000968	dhs-4	0	0.1
WBGene00000970	dhs-6	0	0.2
WBGene00000973	dhs-9	0	0.7
WBGene00000975	dhs-12	0	0.1
WBGene00000984	dhs-21	0	0.1
WBGene00000985	dhs-22	0	0.1
WBGene00000987	dhs-24	0	0.3
WBGene00000993	dhs-30	0	1.1
WBGene00001021	dnj-3	0	0.1
WBGene00001036	dnj-18	0	0.6
WBGene00001045	dnj-27	0	1.6
WBGene00001052	dop-1	0	0.7
WBGene00001053	dop-2	0	0.3
WBGene00001055	dpf-2	0	0.6
WBGene00001056	dpf-3	0	0.6
WBGene00001057	dpf-4	0	0.6
WBGene00001086	dpy-27	0	0.6
WBGene00001093	drp-1	0	0.7
WBGene00001099	dsc-4	0	0.4
WBGene00001116	dyc-1	0	0.6
WBGene00001135	eat-4	0	0.7
WBGene00001155	ech-6	0	0.7
WBGene00001157	ech-8	0	1.4
WBGene00001174	egl-5	0	0.5
WBGene00001188	egl-20	0	1.5
WBGene00001190	egl-23	0	1.2
WBGene00001214	ego-1	0	0.1
WBGene00001228	eif-3.E	0	0.2
WBGene00001233	eif-3.K	0	0.1
WBGene00001234	eif-6	0	0.8
WBGene00001236	elc-1	0	0.4
WBGene00001239	elo-1	0	1.4
WBGene00001253	elt-6	0	0.4
WBGene00001309	emr-1	0	0.5
WBGene00001324	eor-1	0	1
WBGene00001325	eor-2	0	0.5
WBGene00001345	fos-1	0	1.8
WBGene00001368	exc-7	0	0.9
WBGene00001374	exp-2	0	0.3
WBGene00001390	far-6	0	0.4
WBGene00001396	fat-4	0	0.6
WBGene00001399	fat-7	0	0.3
WBGene00001405	fce-1	0	0.4
WBGene00001411	fem-1	0	0.2
WBGene00001425	fis-2	0	0.2
WBGene00001452	flp-9	0	0.1
WBGene00001463	flp-20	0	0.5
WBGene00001470	baz-2	0	0.5
WBGene00001476	fmo-1	0	1.6
WBGene00001492	frm-5.1	0	0.6
WBGene00001495	frm-9	0	0.2
WBGene00001505	fut-1	0	0.2
WBGene00001508	fut-8	0	0.2
WBGene00001514	xnd-1	0	0.2
WBGene00001515	gap-1	0	0.1
WBGene00001560	gei-3	0	0.1
WBGene00001566	acdh-13	0	0.4
WBGene00001577	gem-4	0	0.1
WBGene00001583	gfi-3	0	0.2
WBGene00001584	nrde-4	0	0.6
WBGene00001588	ggr-3	0	0.6
WBGene00001589	gip-1	0	0.5
WBGene00001595	gld-1	0	0.2
WBGene00001603	gln-2	0	0.6
WBGene00001622	glt-4	0	0.4
WBGene00001629	gly-4	0	0.6
WBGene00001636	gly-11	0	0.1
WBGene00001651	gon-2	0	1.7
WBGene00001661	gop-2	0	0.2
WBGene00001673	gpa-11	0	0.3
WBGene00001680	gpb-2	0	0.8
WBGene00001682	gpc-2	0	0.8
WBGene00001707	grh-1	0	0.7
WBGene00001713	grl-4	0	0.3
WBGene00001730	grl-21	0	0.2
WBGene00001744	gars-1	0	0.4
WBGene00001770	gst-22	0	0.6
WBGene00001795	gtl-1	0	0.6
WBGene00001803	lite-1	0	0.3
WBGene00001824	hbl-1	0	0.1
WBGene00001827	hcf-1	0	1.4
WBGene00001832	hcp-4	0	0.5
WBGene00001856	hil-5	0	0.1
WBGene00001879	his-5	0	0.1
WBGene00001892	his-18	0	0.1
WBGene00001977	hmg-12	0	0.4
WBGene00001987	hot-2	0	0.1
WBGene00001990	hot-5	0	0.1
WBGene00001993	hpd-1	0	0.4
WBGene00001996	hpl-2	0	0.1
WBGene00001997	hpr-9	0	0.4
WBGene00002001	hars-1	0	0.4
WBGene00002012	hsp-12.3	0	0.6
WBGene00002030	hst-3.1	0	0.3
WBGene00002041	hum-8	0	0.5
WBGene00002043	hyl-1	0	0.3
WBGene00002044	hyl-2	0	0.7
WBGene00002052	ifa-4	0	3.2
WBGene00002054	ifb-2	0	3.1
WBGene00002055	ifc-1	0	0.8
WBGene00002057	ifd-1	0	0.1
WBGene00002068	ify-1	0	0.2
WBGene00002069	ikb-1	0	0.2
WBGene00002071	ile-2	0	0.1
WBGene00002081	ina-1	0	0.2
WBGene00002110	ins-27	0	0.2
WBGene00002118	ins-35	0	0.2
WBGene00002129	inx-7	0	0.1
WBGene00002133	inx-11	0	0.1
WBGene00002136	inx-14	0	0.5
WBGene00002137	inx-15	0	0.1
WBGene00002139	inx-17	0	0.3
WBGene00002142	inx-20	0	0.8
WBGene00002146	ipp-5	0	0.1
WBGene00002147	ire-1	0	0.6
WBGene00002177	jkk-1	0	0.1
WBGene00002187	kgb-1	0	0.4
WBGene00002216	klp-3	0	1.6
WBGene00002220	gcc-1	0	0.4
WBGene00002224	klp-13	0	0.9
WBGene00002227	klp-17	0	0.4
WBGene00002234	kqt-2	0	0.3
WBGene00002241	kup-1	0	0.3
WBGene00002243	lad-2	0	0.7
WBGene00002245	lag-1	0	0.2
WBGene00002253	lbp-1	0	0.3
WBGene00002265	lec-2	0	0.9
WBGene00002267	lec-4	0	0.5
WBGene00002268	lec-5	0	0.2
WBGene00002273	lec-10	0	2.9
WBGene00002276	lem-3	0	0.1
WBGene00002299	let-23	0	0.5
WBGene00002393	lpr-1	0	0.2
WBGene00002497	let-268	0	0.5
WBGene00002694	let-502	0	1.5
WBGene00002827	let-653	0	0.2
WBGene00002879	let-754	0	0.1
WBGene00002891	let-767	0	0.4
WBGene00002977	lev-10	0	0.5
WBGene00002981	lgg-2	0	0.6
WBGene00002991	lin-2	0	0.7
WBGene00003006	lin-17	0	0.9
WBGene00003010	lin-24	0	0.1
WBGene00003014	lin-28	0	0.2
WBGene00003021	lin-36	0	0.7
WBGene00003022	lin-37	0	0.1
WBGene00003034	lin-49	0	1.1
WBGene00003056	lon-2	0	0.1
WBGene00003062	lpd-6	0	0.8
WBGene00003077	lsm-3	0	0.7
WBGene00003079	lsm-5	0	0.5
WBGene00003083	lst-1	0	1.2
WBGene00003124	mai-1	0	0.2
WBGene00003130	map-2	0	0.1
WBGene00003132	mat-1	0	0.1
WBGene00003134	mat-3	0	0.2
WBGene00003149	mbk-1	0	0.1
WBGene00003151	mca-1	0	0.2
WBGene00003160	mdf-1	0	0.5
WBGene00003164	mdt-6	0	0.6
WBGene00003165	mec-1	0	0.7
WBGene00003175	mec-12	0	0.8
WBGene00003178	mec-17	0	0.4
WBGene00003182	mef-2	0	0.6
WBGene00003234	mif-1	0	0.3
WBGene00003237	mif-4	0	0.1
WBGene00003258	cogc-1	0	0.5
WBGene00003375	mlp-1	0	0.5
WBGene00003405	mre-11	0	0.1
WBGene00003410	mrp-4	0	0.5
WBGene00003424	msp-3	0	0.1
WBGene00003432	msp-36	0	0.5
WBGene00003435	msp-40	0	0.3
WBGene00003442	msp-49	0	0.2
WBGene00003443	msp-50	0	0.2
WBGene00003446	msp-53	0	0.1
WBGene00003451	msp-58	0	0.1
WBGene00003452	msp-59	0	0.2
WBGene00003463	msp-76	0	0.2
WBGene00003465	msp-78	0	1.3
WBGene00003466	msp-79	0	0.8
WBGene00003467	msp-81	0	0.3
WBGene00003468	msp-113	0	0.4
WBGene00003470	msp-152	0	0.5
WBGene00003475	mtm-1	0	0.6
WBGene00003477	mtm-5	0	0.5
WBGene00003478	mtm-6	0	0.4
WBGene00003479	mtm-9	0	0.1
WBGene00003497	mup-4	0	2.3
WBGene00003508	mut-16	0	0.4
WBGene00003510	mxl-2	0	0.1
WBGene00003524	nas-5	0	0.4
WBGene00003533	nas-14	0	0.2
WBGene00003544	nas-25	0	0.2
WBGene00003586	ndx-9	0	0.1
WBGene00003590	nex-3	0	0.8
WBGene00003594	nft-1	0	0.1
WBGene00003601	nhr-2	0	0.2
WBGene00003607	nhr-8	0	0.3
WBGene00003613	nhr-14	0	0.7
WBGene00003618	nhr-19	0	0.1
WBGene00003625	nhr-31	0	0.5
WBGene00003626	nhr-32	0	0.2
WBGene00003634	nhr-44	0	0.1
WBGene00003635	nhr-45	0	3.2
WBGene00003656	nhr-66	0	0.3
WBGene00003659	nhr-69	0	0.1
WBGene00003685	nhr-95	0	0.1
WBGene00003691	nhr-101	0	0.2
WBGene00003693	nhr-103	0	0.2
WBGene00003699	nhr-109	0	0.4
WBGene00003720	nhr-130	0	0.4
WBGene00003723	nhr-133	0	0.2
WBGene00003725	nhr-135	0	0.1
WBGene00003730	nhx-2	0	0.1
WBGene00003733	nhx-5	0	1.1
WBGene00003739	nlp-1	0	0.3
WBGene00003751	nlp-13	0	0.4
WBGene00003752	nlp-14	0	0.3
WBGene00003755	nlp-17	0	0.7
WBGene00003758	nlp-20	0	0.3
WBGene00003765	nlp-27	0	0.2
WBGene00003778	nnt-1	0	0.2
WBGene00003790	npp-4	0	0.1
WBGene00003791	npp-5	0	0.2
WBGene00003796	npp-10	0	0.9
WBGene00003800	npp-14	0	2
WBGene00003802	npp-16	0	0.1
WBGene00003808	npr-2	0	0.2
WBGene00003821	nst-1	0	0.2
WBGene00003828	nuc-1	0	0.9
WBGene00003836	nxt-1	0	0.4
WBGene00003839	ocr-2	0	0.4
WBGene00003844	odc-1	0	0.7
WBGene00003847	blmp-1	0	0.5
WBGene00003870	ooc-5	0	0.1
WBGene00003877	pept-1	0	1
WBGene00003878	pept-3	0	0.7
WBGene00003919	par-4	0	0.2
WBGene00003923	pas-2	0	0.1
WBGene00003933	pat-9	0	0.9
WBGene00003943	pbo-4	0	0.9
WBGene00003947	pbs-1	0	0.1
WBGene00003949	pbs-3	0	0.1
WBGene00003951	pbs-5	0	0.4
WBGene00003952	pbs-6	0	0.1
WBGene00003956	pcp-1	0	0.6
WBGene00003957	pcp-2	0	3.1
WBGene00003958	pcp-3	0	2.8
WBGene00003959	pcp-4	0	1.1
WBGene00003960	pcs-1	0	0.2
WBGene00003968	peb-1	0	0.2
WBGene00003981	pes-8	0	0.7
WBGene00003995	pgp-1	0	0.6
WBGene00004005	pgp-11	0	0.7
WBGene00004010	pha-1	0	0.7
WBGene00004020	pho-1	0	0.3
WBGene00004023	pho-4	0	0.1
WBGene00004037	plc-2	0	0.6
WBGene00004038	plc-3	0	0.3
WBGene00004055	pmk-1	0	0.1
WBGene00004057	pmk-3	0	1
WBGene00004058	pmp-1	0	0.2
WBGene00004059	pmp-2	0	0.5
WBGene00004060	pmp-3	0	0.7
WBGene00004061	pmp-4	0	0.5
WBGene00004063	pmr-1	0	0.2
WBGene00004068	pnk-1	0	1.4
WBGene00004075	pod-1	0	0.4
WBGene00004086	pph-4.2	0	0.2
WBGene00004089	ppk-3	0	1.1
WBGene00004099	abu-15	0	0.1
WBGene00004109	stam-1	0	1
WBGene00004115	pqn-26	0	0.1
WBGene00004128	pqn-41	0	1.4
WBGene00004136	pqn-51	0	0.1
WBGene00004150	pqn-67	0	0.2
WBGene00004169	pqn-89	0	0.4
WBGene00004174	abu-14	0	0.2
WBGene00004183	prk-2	0	0.3
WBGene00004195	prx-6	0	0.4
WBGene00004199	prx-14	0	0.4
WBGene00004201	prx-19	0	0.1
WBGene00004207	ptb-1	0	0.1
WBGene00004211	ptd-2	0	0.7
WBGene00004212	ptl-1	0	0.3
WBGene00004213	ptp-1	0	0.4
WBGene00004220	ptr-5	0	0.1
WBGene00004225	ptr-11	0	0.2
WBGene00004235	ptr-21	0	0.1
WBGene00004236	ptr-22	0	0.3
WBGene00004237	ptr-23	0	0.5
WBGene00004249	pvf-1	0	0.1
WBGene00004254	pxf-1	0	0.4
WBGene00004277	rab-18	0	0.9
WBGene00004278	rab-19	0	0.2
WBGene00004286	rab-39	0	0.2
WBGene00004296	rad-50	0	1
WBGene00004322	rcq-5	0	0.6
WBGene00004335	ref-2	0	0.1
WBGene00004339	rfc-3	0	0.3
WBGene00004342	rfs-1	0	0.2
WBGene00004347	rgs-4	0	0.1
WBGene00004350	rgs-7	0	0.8
WBGene00004356	rhi-1	0	1
WBGene00004358	rhr-1	0	1.8
WBGene00004361	rib-2	0	0.1
WBGene00004367	ric-8	0	0.9
WBGene00004368	ric-19	0	1
WBGene00004369	rig-1	0	0.2
WBGene00004374	rme-2	0	0.3
WBGene00004389	rnp-6	0	0.1
WBGene00004461	rpn-5	0	0.1
WBGene00004463	rpn-7	0	0.3
WBGene00004468	rpn-12	0	0.2
WBGene00004503	rpt-3	0	0.7
WBGene00004505	rpt-5	0	0.6
WBGene00004506	rpt-6	0	0.4
WBGene00004679	rars-1	0	0.3
WBGene00004723	sap-49	0	0.3
WBGene00004729	sax-3	0	1.2
WBGene00004740	scd-2	0	0.2
WBGene00004753	sec-8	0	0.2
WBGene00004754	sec-23	0	0.6
WBGene00004758	sek-1	0	0.1
WBGene00004764	sel-7	0	0.5
WBGene00004787	sft-1	0	0.8
WBGene00004789	sgk-1	0	0.1
WBGene00004793	shw-3	0	0.2
WBGene00004796	sid-2	0	0.1
WBGene00004825	skr-19	0	0.2
WBGene00004826	skr-20	0	0.6
WBGene00004856	sma-2	0	0.2
WBGene00004859	sma-5	0	0.2
WBGene00004876	smf-1	0	0.4
WBGene00004885	smg-7	0	0.3
WBGene00004889	smp-1	0	0.1
WBGene00004893	sms-2	0	0.3
WBGene00004898	snb-2	0	0.3
WBGene00004900	snf-1	0	0.6
WBGene00004904	snf-5	0	0.2
WBGene00004915	snr-2	0	0.1
WBGene00004921	snt-1	0	0.4
WBGene00004930	sod-1	0	0.5
WBGene00004932	sod-3	0	0.1
WBGene00004933	sod-4	0	0.4
WBGene00004950	sox-3	0	0.5
WBGene00004953	spd-2	0	0.7
WBGene00004954	spd-3	0	0.1
WBGene00004962	spe-8	0	0.3
WBGene00004975	spe-39	0	0.1
WBGene00004979	sph-1	0	0.3
WBGene00004995	spp-10	0	0.1
WBGene00004996	spp-11	0	0.2
WBGene00005010	spr-5	0	0.5
WBGene00005020	sqv-2	0	0.2
WBGene00005022	sqv-4	0	0.4
WBGene00005093	srd-15	0	0.1
WBGene00005131	srd-53	0	0.3
WBGene00005149	sre-1	0	0.3
WBGene00005196	srg-39	0	0.6
WBGene00005228	srh-2	0	0.3
WBGene00005271	srh-48	0	0.4
WBGene00005644	srp-3	0	0.3
WBGene00005648	srp-7	0	1.1
WBGene00005657	srr-6	0	0.2
WBGene00005663	sars-1	0	0.7
WBGene00005712	srv-1	0	0.7
WBGene00005826	srw-79	0	0.1
WBGene00005832	srw-85	0	0.3
WBGene00005833	srw-86	0	0.3
WBGene00006039	ssp-10	0	0.9
WBGene00006040	ssp-11	0	0.5
WBGene00006049	ssp-32	0	0.3
WBGene00006051	ssq-2	0	1
WBGene00006053	ssq-4	0	0.4
WBGene00006056	sss-1	0	1.4
WBGene00006059	stc-1	0	0.3
WBGene00006061	stl-1	0	0.2
WBGene00006065	sto-3	0	0.1
WBGene00006066	sto-4	0	0.2
WBGene00006306	sue-1	0	0.2
WBGene00006324	sup-17	0	0.2
WBGene00006351	sur-5	0	0.4
WBGene00006365	syg-1	0	0.1
WBGene00006366	sym-1	0	0.2
WBGene00006383	taf-2	0	0.4
WBGene00006384	taf-3	0	1.3
WBGene00006452	heh-1	0	0.7
WBGene00006454	aex-4	0	0.1
WBGene00006465	fntb-1	0	0.3
WBGene00006472	tag-123	0	0.4
WBGene00006474	wdr-5.1	0	0.2
WBGene00006476	rhgf-2	0	0.7
WBGene00006478	tag-131	0	1
WBGene00006479	tmbi-4	0	0.3
WBGene00006490	kdin-1	0	0.1
WBGene00006491	acl-3	0	0.2
WBGene00006495	cpna-1	0	0.3
WBGene00006514	tdp-1	0	0.3
WBGene00006517	madd-3	0	0.1
WBGene00006519	tag-174	0	1.2
WBGene00006562	tdc-1	0	0.2
WBGene00006577	tlf-1	0	0.3
WBGene00006580	tlp-1	0	0.2
WBGene00006585	tni-3	0	0.4
WBGene00006590	toc-1	0	0.1
WBGene00006591	toh-1	0	0.4
WBGene00006597	tor-1	0	0.4
WBGene00006602	tps-1	0	0.4
WBGene00006604	tra-1	0	1.4
WBGene00006609	tre-3	0	0.2
WBGene00006613	trm-1	0	0.5
WBGene00006615	trp-2	0	0.3
WBGene00006627	tsp-1	0	0.3
WBGene00006628	tsp-2	0	0.3
WBGene00006634	tsp-8	0	0.9
WBGene00006635	tsp-9	0	0.1
WBGene00006640	tsp-14	0	0.3
WBGene00006648	ttb-1	0	0.7
WBGene00006649	tth-1	0	0.2
WBGene00006652	ttx-1	0	0.1
WBGene00006656	twk-1	0	0.1
WBGene00006663	twk-8	0	0.4
WBGene00006668	twk-13	0	1.1
WBGene00006672	twk-18	0	1
WBGene00006680	twk-28	0	0.1
WBGene00006683	twk-31	0	0.2
WBGene00006698	uaf-2	0	0.3
WBGene00006703	ubc-6	0	0.3
WBGene00006704	ubc-7	0	0.3
WBGene00006726	ubl-5	0	1.2
WBGene00006734	ufd-2	0	0.1
WBGene00006741	unc-1	0	0.3
WBGene00006757	unc-18	0	0.6
WBGene00006774	unc-38	0	0.7
WBGene00006785	unc-50	0	0.3
WBGene00006795	unc-61	0	0.4
WBGene00006797	unc-63	0	0.2
WBGene00006809	unc-77	0	0.1
WBGene00006816	unc-84	0	0.5
WBGene00006843	unc-119	0	0.5
WBGene00006875	vab-9	0	0.5
WBGene00006889	pfd-3	0	0.8
WBGene00006893	spon-1	0	0.1
WBGene00006915	vha-6	0	2.2
WBGene00006918	vha-9	0	0.1
WBGene00006926	vit-2	0	0.1
WBGene00006931	vps-26	0	0.1
WBGene00006936	glp-4	0	0.8
WBGene00006940	wee-1.3	0	0.4
WBGene00006942	wrk-1	0	0.3
WBGene00006943	wrm-1	0	0.2
WBGene00006970	zag-1	0	0.2
WBGene00006971	zak-1	0	0.1
WBGene00006983	zig-6	0	1.2
WBGene00006988	zyg-1	0	0.3
WBGene00006993	zyg-8	0	0.5
WBGene00007001	tufm-2	0	0.2
WBGene00007014	mdt-10	0	0.2
WBGene00007041	tag-180	0	0.2
WBGene00007064	2RSSE.1	0	0.1
WBGene00007071	AC3.5	0	0.4
WBGene00007072	ugt-1	0	0.1
WBGene00007097	B0024.4	0	0.1
WBGene00007105	B0035.1	0	0.3
WBGene00007112	B0035.13	0	1
WBGene00007114	mttu-1	0	0.1
WBGene00007155	B0379.1	0	0.4
WBGene00007156	B0379.2	0	0.2
WBGene00007175	B0395.3	0	0.8
WBGene00007185	nlp-36	0	0.1
WBGene00007186	B0464.6	0	0.3
WBGene00007190	rmd-3	0	0.1
WBGene00007197	B0513.5	0	0.7
WBGene00007203	best-1	0	0.3
WBGene00007209	BE10.1	0	0.2
WBGene00007215	oxa-1	0	0.2
WBGene00007220	C01B9.1	0	0.1
WBGene00007221	cpna-3	0	0.4
WBGene00007228	acs-7	0	0.4
WBGene00007243	nspb-7	0	0.2
WBGene00007247	C01G12.7	0	0.7
WBGene00007257	C01H6.8	0	0.3
WBGene00007277	asfl-1	0	0.1
WBGene00007281	C03E10.3	0	0.3
WBGene00007296	arrd-25	0	1.6
WBGene00007301	C04F12.7	0	3.6
WBGene00007307	spch-1	0	0.2
WBGene00007308	C04G2.9	0	0.3
WBGene00007317	C05A9.2	0	0.6
WBGene00007324	C05B5.8	0	0.1
WBGene00007328	pho-10	0	0.6
WBGene00007330	C05C10.3	0	0.6
WBGene00007336	C05C12.4	0	0.5
WBGene00007339	C05D12.1	0	0.1
WBGene00007348	C05G5.2	0	0.6
WBGene00007384	swt-3	0	0.2
WBGene00007386	C06H2.2	0	0.2
WBGene00007404	best-5	0	0.1
WBGene00007434	arp-6	0	0.2
WBGene00007435	C08B11.8	0	0.1
WBGene00007455	ugt-22	0	0.3
WBGene00007478	C09F9.1	0	0.5
WBGene00007495	C09G9.5	0	0.2
WBGene00007501	apc-17	0	0.4
WBGene00007504	C09H10.10	0	0.6
WBGene00007516	gpx-5	0	0.3
WBGene00007529	C11H1.3	0	0.3
WBGene00007533	cbl-1	0	0.2
WBGene00007547	nhr-154	0	0.5
WBGene00007549	spin-1	0	0.7
WBGene00007550	C13C4.6	0	0.1
WBGene00007554	pptr-2	0	0.2
WBGene00007555	dohh-1	0	0.2
WBGene00007556	C14A4.3	0	0.1
WBGene00007561	ccm-3	0	0.8
WBGene00007562	C14A4.12	0	0.3
WBGene00007565	clec-48	0	0.1
WBGene00007581	alkb-8	0	0.2
WBGene00007584	C14C10.1	0	1.3
WBGene00007589	erg-28	0	0.6
WBGene00007620	ocrl-1	0	0.2
WBGene00007626	rnf-121	0	0.4
WBGene00007633	C16D2.1	0	0.1
WBGene00007645	C17E4.6	0	0.5
WBGene00007647	C17E4.10	0	0.1
WBGene00007650	ugt-23	0	0.9
WBGene00007664	seb-3	0	0.5
WBGene00007668	C18B12.6	0	0.5
WBGene00007679	C18D11.1	0	0.1
WBGene00007680	maa-1	0	0.1
WBGene00007681	C18D11.3	0	2
WBGene00007688	C18E9.8	0	0.1
WBGene00007689	C18E9.9	0	0.3
WBGene00007692	C23H4.3	0	0.8
WBGene00007698	qns-1	0	0.6
WBGene00007704	mdt-21	0	0.1
WBGene00007711	lid-1	0	0.1
WBGene00007717	C25D7.5	0	0.1
WBGene00007720	C25D7.10	0	0.4
WBGene00007721	C25D7.12	0	0.2
WBGene00007724	C25F9.4	0	0.1
WBGene00007726	C25F9.6	0	0.1
WBGene00007733	smz-1	0	0.1
WBGene00007736	igdb-2	0	0.1
WBGene00007740	C26C6.6	0	0.3
WBGene00007743	C26C6.9	0	0.3
WBGene00007775	acd-3	0	1
WBGene00007776	dmd-4	0	0.5
WBGene00007778	C27D8.2	0	0.4
WBGene00007779	C27D8.3	0	1.5
WBGene00007786	rmd-2	0	0.1
WBGene00007794	C28D4.7	0	0.3
WBGene00007799	nrx-1	0	0.2
WBGene00007807	C29F3.7	0	0.2
WBGene00007808	best-7	0	0.7
WBGene00007885	ugt-21	0	0.5
WBGene00007913	cyp-36A1	0	0.1
WBGene00007914	mys-4	0	0.3
WBGene00007917	C34C6.4	0	0.5
WBGene00007918	sphk-1	0	0.6
WBGene00007922	pph-6	0	0.2
WBGene00007924	rsu-1	0	0.5
WBGene00007925	C34C12.6	0	0.6
WBGene00007931	C34D1.4	0	0.6
WBGene00007933	C34E7.3	0	0.3
WBGene00007942	idh-2	0	0.1
WBGene00007944	C34F6.10	0	0.5
WBGene00007946	ugt-33	0	0.1
WBGene00007955	C35C5.3	0	0.2
WBGene00007959	C35C5.10	0	0.9
WBGene00007964	cyp-25A2	0	0.4
WBGene00007965	C36A4.4	0	0.1
WBGene00007977	gska-3	0	0.2
WBGene00008001	C38C10.3	0	0.5
WBGene00008019	C38H2.2	0	0.4
WBGene00008033	spin-2	0	0.3
WBGene00008063	C41G7.6	0	0.2
WBGene00008101	C44H9.6	0	1.2
WBGene00008120	C46F11.5	0	0.3
WBGene00008140	xpf-1	0	0.3
WBGene00008143	C47E8.4	0	0.1
WBGene00008165	C47G2.4	0	0.2
WBGene00008166	saps-1	0	0.2
WBGene00008172	C48B4.9	0	0.4
WBGene00008194	C49C3.4	0	1.1
WBGene00008206	set-6	0	0.2
WBGene00008214	gem-1	0	0.2
WBGene00008228	C50B8.6	0	0.2
WBGene00008229	C50F4.1	0	2.8
WBGene00008239	fshr-1	0	0.9
WBGene00008255	C51E3.10	0	0.4
WBGene00008258	mans-2	0	0.8
WBGene00008273	C53B4.3	0	0.1
WBGene00008331	ttll-5	0	0.4
WBGene00008338	pafo-1	0	0.3
WBGene00008339	C55A6.10	0	0.1
WBGene00008352	fbxa-6	0	0.1
WBGene00008366	tpra-1	0	0.4
WBGene00008368	D1053.3	0	0.2
WBGene00008369	D1053.4	0	0.5
WBGene00008370	D1054.1	0	0.4
WBGene00008372	D1054.5	0	0.2
WBGene00008395	D1086.8	0	0.4
WBGene00008398	D2005.3	0	0.2
WBGene00008415	mce-1	0	0.9
WBGene00008421	D2030.12	0	0.1
WBGene00008426	D2045.9	0	0.3
WBGene00008435	glna-2	0	0.7
WBGene00008441	usp-50	0	0.3
WBGene00008442	E01B7.2	0	0.1
WBGene00008453	E02A10.3	0	0.2
WBGene00008456	E02H1.2	0	0.3
WBGene00008462	E02H4.4	0	0.2
WBGene00008476	E03H4.8	0	0.1
WBGene00008482	cut-4	0	0.3
WBGene00008486	ugt-44	0	0.4
WBGene00008509	F01G10.6	0	0.3
WBGene00008510	lipl-7	0	0.4
WBGene00008515	F02C12.1	0	1.1
WBGene00008521	F02D8.4	0	0.3
WBGene00008528	F02E9.1	0	0.3
WBGene00008538	sqrd-1	0	0.7
WBGene00008577	F08G2.5	0	0.6
WBGene00008578	F08G2.7	0	0.6
WBGene00008584	F08G5.6	0	1.2
WBGene00008588	F08G12.5	0	0.1
WBGene00008590	F08H9.2	0	0.3
WBGene00008598	spin-3	0	0.4
WBGene00008629	cpt-5	0	0.1
WBGene00008634	F10A3.4	0	1.1
WBGene00008642	F10B5.8	0	0.7
WBGene00008644	F10C2.3	0	0.4
WBGene00008645	F10C2.4	0	0.6
WBGene00008654	F10F2.2	0	0.3
WBGene00008659	clec-151	0	0.1
WBGene00008664	nubp-1	0	0.7
WBGene00008667	F10G8.9	0	0.1
WBGene00008669	acs-14	0	0.4
WBGene00008686	F11A10.5	0	0.1
WBGene00008691	mff-1	0	0.3
WBGene00008706	gba-3	0	0.1
WBGene00008726	F13A7.11	0	0.3
WBGene00008731	F13B12.3	0	0.3
WBGene00008742	F13D12.8	0	0.1
WBGene00008750	F13E9.1	0	0.1
WBGene00008754	F13E9.5	0	0.5
WBGene00008760	F13E9.11	0	0.4
WBGene00008762	ztf-2	0	0.7
WBGene00008764	dylt-1	0	0.1
WBGene00008767	F13G3.7	0	0.2
WBGene00008775	mogs-1	0	0.1
WBGene00008777	F13H10.6	0	0.1
WBGene00008781	rpoa-2	0	0.3
WBGene00008811	F14F7.4	0	0.5
WBGene00008820	F14F11.2	0	0.1
WBGene00008829	cyp-35D1	0	0.3
WBGene00008832	obr-2	0	0.4
WBGene00008857	timm-23	0	0.1
WBGene00008887	tbcd-1	0	0.2
WBGene00008919	vps-36	0	0.1
WBGene00008922	F17C11.11	0	6.3
WBGene00008923	F17C11.12	0	1
WBGene00008926	F17H10.2	0	0.7
WBGene00008939	F18H3.1	0	0.2
WBGene00008940	F18H3.4	0	0.4
WBGene00008948	F19B6.1	0	0.2
WBGene00008957	glb-13	0	0.1
WBGene00008978	cutl-3	0	0.2
WBGene00008979	F20D1.9	0	0.4
WBGene00008993	F21A3.3	0	0.4
WBGene00009009	F21D5.4	0	0.2
WBGene00009011	F21D5.6	0	0.5
WBGene00009030	clec-233	0	0.4
WBGene00009031	F21H7.5	0	0.4
WBGene00009049	F22B8.7	0	0.3
WBGene00009058	F22E12.1	0	0.8
WBGene00009059	chw-1	0	0.1
WBGene00009070	F23A7.5	0	0.2
WBGene00009084	F23B12.7	0	1.9
WBGene00009121	F25H2.7	0	0.2
WBGene00009137	bath-39	0	0.3
WBGene00009165	gpx-1	0	0.1
WBGene00009173	prom-1	0	0.1
WBGene00009187	F27D4.1	0	0.3
WBGene00009207	F28C6.8	0	0.2
WBGene00009239	irld-6	0	0.4
WBGene00009246	gfm-1	0	0.5
WBGene00009257	F29G6.1	0	0.3
WBGene00009267	usp-48	0	0.4
WBGene00009276	F30F8.9	0	0.4
WBGene00009277	F30F8.10	0	0.5
WBGene00009284	F31C3.2	0	0.3
WBGene00009293	F31D4.8	0	0.2
WBGene00009307	F32A11.1	0	1.2
WBGene00009314	F32B4.4	0	0.1
WBGene00009320	F32B6.3	0	0.1
WBGene00009333	F32D8.10	0	0.1
WBGene00009334	F32D8.12	0	0.6
WBGene00009336	F32D8.14	0	0.1
WBGene00009344	F32H2.7	0	0.3
WBGene00009369	F33H2.6	0	0.5
WBGene00009387	glb-15	0	0.1
WBGene00009402	F35C11.3	0	0.1
WBGene00009429	F35E12.5	0	0.4
WBGene00009430	F35E12.6	0	2.4
WBGene00009433	F35E12.9	0	0.9
WBGene00009434	F35E12.10	0	0.1
WBGene00009437	F35G2.3	0	0.2
WBGene00009448	zfp-2	0	0.2
WBGene00009452	F36A2.2	0	0.4
WBGene00009461	madf-2	0	0.3
WBGene00009478	syx-7	0	0.3
WBGene00009482	F36G3.1	0	0.2
WBGene00009483	F36G3.2	0	0.2
WBGene00009495	hrg-6	0	0.6
WBGene00009500	F36H2.3	0	0.4
WBGene00009530	F38B2.3	0	0.1
WBGene00009560	psa-3	0	0.7
WBGene00009563	F39H2.3	0	0.9
WBGene00009579	arrd-6	0	0.3
WBGene00009623	F41E7.7	0	0.1
WBGene00009632	ttyh-1	0	0.4
WBGene00009645	F42G10.1	0	0.3
WBGene00009654	sly-1	0	0.2
WBGene00009666	slc-25A42	0	1
WBGene00009673	F43G9.13	0	0.1
WBGene00009680	msd-1	0	0.8
WBGene00009681	gipc-2	0	0.2
WBGene00009685	F44D12.8	0	0.2
WBGene00009706	argk-1	0	0.3
WBGene00009726	tbc-13	0	0.2
WBGene00009727	lips-1	0	0.4
WBGene00009773	lipl-2	0	0.1
WBGene00009787	F46F2.3	0	1.6
WBGene00009798	F46G10.4	0	0.3
WBGene00009803	F47B8.2	0	0.1
WBGene00009811	F47B8.10	0	0.3
WBGene00009812	suca-1	0	0.4
WBGene00009826	F47G4.5	0	0.1
WBGene00009839	fbxa-188	0	0.1
WBGene00009842	igeg-2	0	0.1
WBGene00009850	F48F7.5	0	0.3
WBGene00009851	F48F7.6	0	0.1
WBGene00009877	F49C12.7	0	0.1
WBGene00009878	F49C12.9	0	0.3
WBGene00009880	F49C12.11	0	0.1
WBGene00009882	vha-17	0	0.4
WBGene00009886	F49E2.2	0	0.5
WBGene00009887	glb-17	0	0.2
WBGene00009915	F52A8.1	0	0.6
WBGene00009916	F52A8.3	0	1.3
WBGene00009918	F52A8.5	0	0.1
WBGene00009953	F53A2.9	0	0.3
WBGene00009966	F53B7.3	0	0.6
WBGene00009969	F53B7.7	0	0.2
WBGene00009971	F53C11.1	0	0.4
WBGene00009977	swan-1	0	0.1
WBGene00009992	F53F4.10	0	0.4
WBGene00010006	F53H2.3	0	4.5
WBGene00010014	F54B3.2	0	0.6
WBGene00010015	atad-3	0	0.5
WBGene00010050	F54D5.4	0	0.1
WBGene00010056	smc-6	0	0.3
WBGene00010059	F54E4.3	0	1.2
WBGene00010070	nep-17	0	5.1
WBGene00010083	F55B11.1	0	0.7
WBGene00010096	rskd-1	0	0.9
WBGene00010109	F55C10.5	0	0.4
WBGene00010135	F55H12.4	0	0.3
WBGene00010139	F56A8.3	0	1
WBGene00010172	oac-36	0	0.1
WBGene00010175	F56H11.2	0	0.1
WBGene00010232	F58B3.6	0	0.2
WBGene00010251	sta-2	0	1.2
WBGene00010254	F58E6.5	0	0.1
WBGene00010262	droe-4	0	0.2
WBGene00010290	F58H1.7	0	0.2
WBGene00010307	skat-1	0	1
WBGene00010309	rpn-6.2	0	0.5
WBGene00010311	F59B2.9	0	0.4
WBGene00010315	F59B2.13	0	0.2
WBGene00010337	F59F4.2	0	0.2
WBGene00010338	F59F4.3	0	0.1
WBGene00010340	slcf-1	0	0.2
WBGene00010348	H01G02.1	0	1.1
WBGene00010351	cbd-1	0	0.2
WBGene00010357	H03A11.2	0	0.5
WBGene00010377	nspa-1	0	0.4
WBGene00010401	H16D19.3	0	0.3
WBGene00010408	mboa-2	0	0.5
WBGene00010435	JC8.2	0	0.1
WBGene00010440	ttr-51	0	0.7
WBGene00010451	K01A11.3	0	0.1
WBGene00010456	K01C8.1	0	0.1
WBGene00010470	cdr-4	0	1
WBGene00010471	cdr-6	0	0.6
WBGene00010486	K01H12.4	0	0.4
WBGene00010496	sec-12	0	0.1
WBGene00010503	K02C4.5	0	0.2
WBGene00010522	K03A11.5	0	0.8
WBGene00010542	K03H1.7	0	0.1
WBGene00010547	K03H1.12	0	0.2
WBGene00010552	K04C1.2	0	0.2
WBGene00010558	ptp-4	0	0.4
WBGene00010563	K04G2.4	0	0.7
WBGene00010564	ath-1	0	0.2
WBGene00010566	K04G2.7	0	0.2
WBGene00010567	K04G2.9	0	0.1
WBGene00010579	K05C4.2	0	0.1
WBGene00010609	dut-1	0	0.4
WBGene00010621	egg-6	0	0.3
WBGene00010625	K07C5.2	0	0.4
WBGene00010628	ceeh-2	0	1
WBGene00010637	K07F5.12	0	0.3
WBGene00010645	fecl-1	0	0.3
WBGene00010651	K08C9.2	0	0.4
WBGene00010652	K08C9.5	0	0.1
WBGene00010658	K08D8.4	0	2.1
WBGene00010660	K08D8.6	0	1.2
WBGene00010666	K08E4.2	0	0.3
WBGene00010670	K08E4.6	0	0.1
WBGene00010676	K08F4.1	0	1
WBGene00010686	K08F9.3	0	0.4
WBGene00010694	bgnt-1.5	0	0.4
WBGene00010699	trpp-6	0	0.3
WBGene00010724	K09E9.1	0	0.1
WBGene00010727	K09G1.1	0	0.4
WBGene00010728	K09G1.2	0	0.2
WBGene00010752	K10G4.3	0	2.3
WBGene00010759	cysl-2	0	0.4
WBGene00010770	K11D2.4	0	0.2
WBGene00010776	pix-1	0	0.5
WBGene00010784	twk-48	0	0.4
WBGene00010795	M01A8.1	0	0.5
WBGene00010809	M01F1.3	0	0.1
WBGene00010810	M01F1.4	0	0.3
WBGene00010823	M01G12.10	0	0.1
WBGene00010828	M02B1.3	0	1.6
WBGene00010829	M02B1.4	0	0.3
WBGene00010842	ymel-1	0	0.3
WBGene00010846	M04B2.2	0	0.2
WBGene00010847	M04B2.4	0	0.2
WBGene00010849	M04B2.7	0	0.2
WBGene00010851	M04C3.2	0	0.3
WBGene00010867	tag-260	0	0.7
WBGene00010870	let-522	0	3.6
WBGene00010878	M05D6.5	0	0.2
WBGene00010887	M7.12	0	0.6
WBGene00010888	dlc-2	0	0.1
WBGene00010899	M28.8	0	0.1
WBGene00010900	M28.9	0	0.2
WBGene00010909	cisd-3.1	0	0.2
WBGene00010910	M106.2	0	0.4
WBGene00010935	M163.1	0	0.1
WBGene00010970	glb-20	0	0.1
WBGene00010976	R02D5.1	0	0.1
WBGene00010993	vha-20	0	0.9
WBGene00010998	R03G8.3	0	0.5
WBGene00011002	nhr-205	0	0.7
WBGene00011017	R04F11.5	0	0.1
WBGene00011029	abhd-11.2	0	0.5
WBGene00011037	R05D11.9	0	0.1
WBGene00011045	gpx-2	0	0.1
WBGene00011050	agl-1	0	0.5
WBGene00011055	arrd-14	0	0.3
WBGene00011083	glo-1	0	0.1
WBGene00011093	R07B7.9	0	0.1
WBGene00011104	cut-5	0	0.5
WBGene00011111	snfc-5	0	0.7
WBGene00011140	R08B4.4	0	0.5
WBGene00011143	R08D7.2	0	0.1
WBGene00011154	R09A8.5	0	0.3
WBGene00011173	acs-18	0	0.1
WBGene00011176	R09E10.6	0	0.1
WBGene00011181	R09H10.3	0	1
WBGene00011182	R09H10.5	0	0.7
WBGene00011212	R10E8.6	0	0.6
WBGene00011216	usp-46	0	1.2
WBGene00011217	R10E11.5	0	0.1
WBGene00011221	R10E12.2	0	0.3
WBGene00011230	nud-2	0	1.2
WBGene00011237	gkow-1	0	0.4
WBGene00011251	glb-22	0	0.2
WBGene00011261	nphp-4	0	0.4
WBGene00011265	R13H4.7	0	0.4
WBGene00011271	flad-1	0	0.1
WBGene00011297	R102.10	0	0.1
WBGene00011307	mpst-7	0	0.3
WBGene00011311	T01B7.5	0	0.5
WBGene00011312	trcs-2	0	0.1
WBGene00011323	mut-15	0	0.2
WBGene00011330	T01D3.6	0	0.5
WBGene00011331	T01E8.1	0	0.4
WBGene00011336	ubxn-5	0	0.9
WBGene00011337	T01G1.2	0	0.2
WBGene00011338	sec-31	0	0.3
WBGene00011355	lgc-14	0	0.2
WBGene00011361	lyst-1	0	0.1
WBGene00011368	tftc-5	0	0.6
WBGene00011374	T02D1.8	0	0.1
WBGene00011381	npr-25	0	0.1
WBGene00011385	T02G6.2	0	0.3
WBGene00011397	T03E6.8	0	0.4
WBGene00011407	ppat-1	0	0.3
WBGene00011414	T04A8.13	0	0.1
WBGene00011439	T04F3.4	0	0.1
WBGene00011445	T04F8.7	0	0.3
WBGene00011449	T04H1.2	0	0.5
WBGene00011474	aldo-1	0	0.4
WBGene00011476	T05D4.3	0	0.4
WBGene00011487	T05E12.6	0	0.6
WBGene00011488	nra-2	0	1
WBGene00011495	T05F1.11	0	1.2
WBGene00011498	T05G5.1	0	1.5
WBGene00011500	T05G5.5	0	0.1
WBGene00011511	gpcp-2	0	0.6
WBGene00011517	cgt-1	0	0.2
WBGene00011527	cchl-1	0	0.2
WBGene00011530	T06D8.10	0	0.5
WBGene00011538	T06E6.1	0	0.1
WBGene00011543	acl-2	0	0.1
WBGene00011571	ttr-46	0	0.6
WBGene00011578	npr-20	0	0.3
WBGene00011579	T07D4.2	0	0.4
WBGene00011580	ddx-19	0	0.8
WBGene00011631	T08G11.4	0	0.4
WBGene00011661	ztf-27	0	0.2
WBGene00011670	fbxa-84	0	0.2
WBGene00011676	cyp-13A2	0	0.9
WBGene00011679	ucr-2.2	0	0.2
WBGene00011684	T10B10.8	0	0.2
WBGene00011694	T10G3.3	0	0.1
WBGene00011705	T11A5.6	0	0.3
WBGene00011719	T11G6.4	0	0.6
WBGene00011730	drr-2	0	0.2
WBGene00011732	arrd-17	0	0.2
WBGene00011733	T12D8.5	0	0.2
WBGene00011736	T12D8.9	0	0.5
WBGene00011749	ssp-36	0	0.1
WBGene00011798	T16G1.4	0	0.2
WBGene00011803	T16G12.1	0	1.2
WBGene00011806	ekl-6	0	0.2
WBGene00011820	T18D3.1	0	0.3
WBGene00011821	cdf-2	0	0.2
WBGene00011832	bgal-1	0	0.9
WBGene00011864	T20F10.2	0	0.2
WBGene00011883	mrpl-50	0	0.7
WBGene00011891	del-6	0	0.1
WBGene00011893	T21C9.6	0	0.1
WBGene00011897	scpl-4	0	0.5
WBGene00011914	T22C1.3	0	0.3
WBGene00011917	T22C1.6	0	0.7
WBGene00011932	sptl-3	0	0.3
WBGene00011936	pgrn-1	0	0.5
WBGene00011938	alh-13	0	0.1
WBGene00011939	prmt-3	0	0.2
WBGene00011940	T23B5.3	0	0.5
WBGene00011955	cdka-1	0	0.3
WBGene00011956	T23F11.4	0	0.1
WBGene00011967	pir-1	0	1.1
WBGene00011972	T23G11.7	0	0.8
WBGene00011990	T24D5.2	0	0.3
WBGene00011994	samp-1	0	0.1
WBGene00012000	T24H10.1	0	0.3
WBGene00012004	dyrb-1	0	0.1
WBGene00012014	T25B9.8	0	0.4
WBGene00012035	T26C5.5	0	0.3
WBGene00012037	T26E3.4	0	0.2
WBGene00012085	T27D12.1	0	0.4
WBGene00012101	zip-10	0	0.3
WBGene00012105	T27F6.6	0	0.5
WBGene00012118	grsp-2	0	0.8
WBGene00012122	T28C6.8	0	0.3
WBGene00012125	T28D6.5	0	0.1
WBGene00012127	T28D6.7	0	0.2
WBGene00012128	nra-1	0	0.5
WBGene00012134	T28F3.8	0	0.8
WBGene00012144	T28H10.3	0	2
WBGene00012158	ucr-2.1	0	0.6
WBGene00012162	sek-6	0	0.7
WBGene00012172	W01B6.5	0	0.5
WBGene00012193	vps-25	0	0.4
WBGene00012197	W02B8.1	0	0.3
WBGene00012199	mltn-3	0	0.1
WBGene00012216	W02D9.10	0	0.4
WBGene00012235	W04A4.6	0	0.3
WBGene00012253	clec-50	0	1.3
WBGene00012261	lpr-3	0	0.1
WBGene00012282	W05E10.5	0	0.2
WBGene00012291	W06A7.2	0	0.3
WBGene00012294	nspa-8	0	0.2
WBGene00012306	W06F12.2	0	0.6
WBGene00012316	ctps-1	0	1.2
WBGene00012342	mtr-4	0	0.3
WBGene00012359	W09D10.1	0	0.4
WBGene00012363	W09D10.5	0	0.8
WBGene00012381	Y2H9A.4	0	0.1
WBGene00012382	ttr-16	0	1.1
WBGene00012389	Y6B3B.4	0	0.5
WBGene00012396	Y6D1A.2	0	0.1
WBGene00012399	Y6E2A.5	0	0.2
WBGene00012418	Y7A9C.1	0	0.3
WBGene00012440	Y12A6A.2	0	0.6
WBGene00012443	Y15E3A.4	0	0.1
WBGene00012444	Y15E3A.5	0	1.3
WBGene00012452	Y17D7B.4	0	0.1
WBGene00012462	Y17G7B.8	0	1.7
WBGene00012463	Y17G7B.10	0	0.6
WBGene00012475	Y18D10A.2	0	0.1
WBGene00012478	mxt-1	0	0.4
WBGene00012489	Y19D2B.1	0	0.1
WBGene00012494	nhr-232	0	0.4
WBGene00012525	Y32B12C.1	0	0.1
WBGene00012529	Y32F6A.4	0	0.4
WBGene00012532	crp-1	0	0.6
WBGene00012533	fbxa-209	0	0.1
WBGene00012544	Y37D8A.2	0	0.5
WBGene00012547	Y37D8A.5	0	0.2
WBGene00012554	Y37D8A.16	0	0.4
WBGene00012558	Y37D8A.21	0	0.2
WBGene00012573	Y37H2C.1	0	0.5
WBGene00012605	Y38F1A.1	0	0.2
WBGene00012606	Y38F1A.2	0	0.9
WBGene00012608	Y38F1A.6	0	0.9
WBGene00012647	swt-4	0	0.1
WBGene00012652	Y39A1A.14	0	0.5
WBGene00012654	Y39A1A.16	0	0.1
WBGene00012657	Y39A1A.20	0	0.2
WBGene00012664	Y39B6A.1	0	2.4
WBGene00012665	pph-5	0	0.1
WBGene00012669	Y39B6A.7	0	0.4
WBGene00012676	pro-3	0	0.9
WBGene00012695	Y39B6A.37	0	0.5
WBGene00012696	reps-1	0	0.3
WBGene00012701	Y39B6A.43	0	0.4
WBGene00012712	ttm-1	0	0.3
WBGene00012713	Y39E4A.3	0	0.3
WBGene00012720	Y39E4B.11	0	0.5
WBGene00012721	Y39E4B.13	0	0.3
WBGene00012759	sup-1	0	0.8
WBGene00012762	Y41E3.1	0	0.9
WBGene00012765	Y41E3.7	0	0.2
WBGene00012791	Y43D4A.5	0	1.5
WBGene00012823	Y43F8B.13	0	0.8
WBGene00012835	ani-3	0	0.3
WBGene00012866	afmd-2	0	0.3
WBGene00012869	Y45F10A.7	0	0.1
WBGene00012896	snrp-200	0	1.4
WBGene00012901	cnp-2	0	0.5
WBGene00012911	acl-7	0	0.4
WBGene00012912	Y46G5A.22	0	0.3
WBGene00012920	Y46G5A.35	0	0.2
WBGene00012928	aakb-2	0	0.7
WBGene00012939	Y47D3B.1	0	0.2
WBGene00012941	Y47D3B.4	0	0.3
WBGene00012948	dhhc-2	0	0.2
WBGene00012951	Y47H9C.8	0	0.4
WBGene00012967	kvs-4	0	0.3
WBGene00012977	Y48A6C.4	0	0.4
WBGene00012982	jmjd-2	0	1.2
WBGene00012999	rpoa-1	0	1.3
WBGene00013006	lin-38	0	0.1
WBGene00013011	snx-14	0	0.5
WBGene00013021	Y48G10A.4	0	1.2
WBGene00013037	Y49E10.18	0	1.1
WBGene00013039	scav-3	0	0.2
WBGene00013040	Y49E10.21	0	0.7
WBGene00013075	Y51A2D.7	0	0.2
WBGene00013094	Y51H1A.3	0	0.2
WBGene00013103	Y51H4A.7	0	0.5
WBGene00013104	Y51H4A.8	0	2.2
WBGene00013111	sta-1	0	0.4
WBGene00013119	Y51H4A.25	0	0.6
WBGene00013135	rga-2	0	0.5
WBGene00013168	arp-1	0	0.5
WBGene00013177	rsy-1	0	0.2
WBGene00013178	Y53H1A.2	0	0.4
WBGene00013210	Y54G9A.7	0	0.4
WBGene00013211	Y54G9A.9	0	0.3
WBGene00013212	Y54G11A.1	0	0.1
WBGene00013218	Y54G11A.9	0	0.1
WBGene00013219	Y54G11A.11	0	0.2
WBGene00013220	ctl-3	0	0.2
WBGene00013222	dmsr-6	0	0.3
WBGene00013224	Y55D9A.2	0	0.1
WBGene00013227	Y56A3A.6	0	0.3
WBGene00013231	tsen-2	0	0.6
WBGene00013244	Y56A3A.33	0	0.3
WBGene00013257	Y57A10A.14	0	0.5
WBGene00013266	Y57A10A.26	0	0.3
WBGene00013317	Y57G11C.22	0	0.7
WBGene00013347	Y59A8B.10	0	0.7
WBGene00013350	slr-2	0	0.6
WBGene00013365	Y60A3A.19	0	0.1
WBGene00013378	emc-3	0	0.2
WBGene00013406	Y63D3A.7	0	0.3
WBGene00013407	Y63D3A.8	0	0.1
WBGene00013415	Y64G10A.6	0	0.2
WBGene00013416	Y64G10A.7	0	0.8
WBGene00013462	micu-1	0	0.4
WBGene00013489	col-42	0	0.3
WBGene00013529	Y73F8A.24	0	0.1
WBGene00013530	ntl-11	0	0.2
WBGene00013540	Y75B8A.3	0	0.4
WBGene00013541	Y75B8A.4	0	0.5
WBGene00013549	Y75B8A.13	0	0.4
WBGene00013559	Y75B8A.28	0	0.1
WBGene00013561	Y75B8A.31	0	0.2
WBGene00013568	Y75B12B.3	0	1.5
WBGene00013578	scav-2	0	0.4
WBGene00013579	Y79H2A.2	0	0.1
WBGene00013590	Y81G3A.1	0	0.1
WBGene00013623	fbxa-90	0	0.3
WBGene00013669	Y105E8A.8	0	0.1
WBGene00013688	riok-2	0	0.7
WBGene00013690	hprt-1	0	0.2
WBGene00013696	Y106G6A.4	0	0.5
WBGene00013700	Y106G6D.3	0	0.1
WBGene00013703	Y106G6D.7	0	0.4
WBGene00013716	Y106G6H.1	0	0.4
WBGene00013736	Y111B2A.13	0	0.1
WBGene00013763	Y113G7B.14	0	0.9
WBGene00013789	Y116A8C.9	0	0.2
WBGene00013822	Y116F11B.6	0	0.1
WBGene00013833	ZC15.5	0	0.1
WBGene00013847	cls-3	0	0.2
WBGene00013872	ZC374.2	0	0.3
WBGene00013874	ZC376.2	0	1.2
WBGene00013887	nspa-5	0	0.3
WBGene00013888	nspa-3	0	0.3
WBGene00013895	ZC434.9	0	0.1
WBGene00013901	ugt-16	0	0.4
WBGene00013906	ugt-5	0	0.5
WBGene00013914	lgc-37	0	0.2
WBGene00013920	pssy-1	0	0.6
WBGene00013923	ghi-1	0	0.4
WBGene00013924	rad-23	0	0.4
WBGene00013963	sulp-8	0	0.5
WBGene00013983	ZK512.2	0	0.4
WBGene00013994	ZK524.4	0	0.9
WBGene00014004	fic-1	0	0.5
WBGene00014025	asna-1	0	0.4
WBGene00014028	trxr-2	0	0.2
WBGene00014039	ZK662.2	0	0.1
WBGene00014058	ZK673.2	0	1.5
WBGene00014077	ZK792.4	0	0.6
WBGene00014079	ZK792.7	0	0.2
WBGene00014088	ZK809.8	0	0.2
WBGene00014096	ZK829.7	0	0.5
WBGene00014109	chpf-1	0	0.2
WBGene00014124	usip-1	0	0.1
WBGene00014127	ZK892.3	0	0.3
WBGene00014138	clec-186	0	0.6
WBGene00014141	ZK899.2	0	0.6
WBGene00014152	ZK930.2	0	0.2
WBGene00014164	lact-2	0	0.6
WBGene00014168	ZK945.6	0	0.3
WBGene00014173	ZK970.7	0	0.2
WBGene00014181	ZK1010.8	0	0.3
WBGene00014202	mmcm-1	0	1
WBGene00014204	ccdc-47	0	0.1
WBGene00014223	ZK1098.6	0	0.4
WBGene00014224	mrps-23	0	0.2
WBGene00014240	htas-1	0	0.1
WBGene00014253	ZK1320.3	0	0.3
WBGene00014258	ZK1320.9	0	0.2
WBGene00014262	ZK1321.4	0	0.5
WBGene00014300	D2023.1	0	0.3
WBGene00014308	F07H5.4	0	0.1
WBGene00014562	Y17D7B.7	0	0.1
WBGene00014772	F56D5.4	0	0.1
WBGene00014826	R13H4.2	0	0.8
WBGene00015001	B0025.4	0	0.4
WBGene00015011	B0041.8	0	0.3
WBGene00015018	srz-85	0	0.2
WBGene00015023	B0205.9	0	0.1
WBGene00015024	B0205.10	0	0.3
WBGene00015027	B0207.2	0	0.2
WBGene00015032	B0207.9	0	0.6
WBGene00015033	B0207.10	0	0.2
WBGene00015048	faah-2	0	0.1
WBGene00015067	B0238.1	0	0.2
WBGene00015105	pot-1	0	0.1
WBGene00015107	B0280.13	0	0.9
WBGene00015116	pacs-1	0	0.4
WBGene00015122	B0302.5	0	0.1
WBGene00015130	vps-33.1	0	0.1
WBGene00015133	mrpl-11	0	0.6
WBGene00015137	B0310.1	0	0.1
WBGene00015155	B0353.1	0	0.1
WBGene00015157	B0361.3	0	0.1
WBGene00015163	B0361.9	0	0.7
WBGene00015167	B0403.3	0	0.6
WBGene00015175	srz-4	0	0.2
WBGene00015177	tmc-2	0	0.7
WBGene00015179	B0416.3	0	0.4
WBGene00015181	B0416.5	0	1.3
WBGene00015203	B0495.2	0	0.5
WBGene00015204	B0495.5	0	0.8
WBGene00015210	B0496.1	0	0.3
WBGene00015217	tes-1	0	0.4
WBGene00015219	B0507.2	0	0.1
WBGene00015230	tag-344	0	0.2
WBGene00015249	otub-4	0	0.3
WBGene00015257	B0554.4	0	0.1
WBGene00015263	B0563.6	0	0.3
WBGene00015294	C01C10.2	0	0.1
WBGene00015296	C01F1.1	0	0.3
WBGene00015301	C01F1.6	0	0.3
WBGene00015310	fan-1	0	0.3
WBGene00015329	C02B10.4	0	0.1
WBGene00015351	C02F5.10	0	0.3
WBGene00015354	snet-1	0	1.1
WBGene00015355	C02F12.5	0	0.1
WBGene00015357	C02F12.8	0	0.6
WBGene00015359	C02G6.1	0	0.1
WBGene00015378	C03B1.7	0	0.2
WBGene00015389	scav-1	0	0.2
WBGene00015405	C03H5.3	0	0.1
WBGene00015410	tbc-6	0	0.1
WBGene00015413	pdhb-1	0	0.2
WBGene00015422	C04E6.5	0	0.3
WBGene00015429	sor-3	0	0.2
WBGene00015430	C04E7.3	0	0.7
WBGene00015444	C04F5.2	0	0.3
WBGene00015450	C04F5.8	0	0.2
WBGene00015454	C04G6.4	0	0.6
WBGene00015462	C05C8.5	0	0.3
WBGene00015472	C05D9.3	0	0.5
WBGene00015473	C05D9.4	0	0.4
WBGene00015477	attf-4	0	0.7
WBGene00015492	lnp-1	0	0.3
WBGene00015497	nhr-76	0	0.2
WBGene00015509	C06A6.4	0	0.1
WBGene00015510	C06A6.5	0	0.6
WBGene00015523	ztf-30	0	0.2
WBGene00015547	ain-1	0	1.3
WBGene00015552	C06G3.6	0	0.8
WBGene00015565	C07D8.6	0	0.8
WBGene00015569	C07D10.5	0	0.1
WBGene00015574	irg-1	0	0.3
WBGene00015576	C07G3.8	0	0.1
WBGene00015589	C08A9.9	0	0.1
WBGene00015597	fbxa-162	0	0.2
WBGene00015609	math-4	0	0.5
WBGene00015619	C08G9.1	0	0.5
WBGene00015621	C09B7.2	0	1.4
WBGene00015638	C09E7.4	0	0.3
WBGene00015641	C09E7.7	0	0.3
WBGene00015644	C09E8.1	0	0.5
WBGene00015647	C09F5.1	0	0.3
WBGene00015648	orai-1	0	0.4
WBGene00015685	C10G11.1	0	0.1
WBGene00015703	C11D2.7	0	0.1
WBGene00015705	nhr-152	0	0.8
WBGene00015713	C12D12.1	0	5.6
WBGene00015728	C13A10.1	0	0.3
WBGene00015740	C13E3.1	0	1.5
WBGene00015741	C13F10.1	0	0.1
WBGene00015750	C14A11.5	0	0.5
WBGene00015776	dct-1	0	0.2
WBGene00015778	got-2.2	0	1.3
WBGene00015780	C14F11.4	0	0.2
WBGene00015793	C15C7.7	0	0.5
WBGene00015795	C15F1.2	0	0.2
WBGene00015801	C15H9.5	0	0.3
WBGene00015805	C15H9.11	0	2.3
WBGene00015806	smrc-1	0	0.5
WBGene00015814	C16A3.10	0	0.6
WBGene00015822	C16B8.2	0	0.3
WBGene00015823	C16B8.3	0	4.1
WBGene00015887	C17C3.1	0	0.5
WBGene00015921	C17H11.1	0	0.2
WBGene00015922	C17H11.2	0	0.3
WBGene00015929	C17H12.3	0	0.4
WBGene00015930	C17H12.4	0	0.2
WBGene00015931	C17H12.5	0	0.3
WBGene00015938	anat-1	0	0.2
WBGene00015947	C18A11.1	0	0.8
WBGene00015956	C18B2.5	0	0.5
WBGene00016005	ift-74	0	0.1
WBGene00016008	C23F12.3	0	0.3
WBGene00016009	C23F12.4	0	0.1
WBGene00016014	C23G10.7	0	0.1
WBGene00016019	C23H3.3	0	0.1
WBGene00016021	C23H3.5	0	0.4
WBGene00016022	C23H3.9	0	0.2
WBGene00016023	prmt-6	0	0.1
WBGene00016030	C24A1.3	0	0.2
WBGene00016044	C24B5.1	0	0.3
WBGene00016058	nspd-3	0	0.2
WBGene00016068	C24H10.2	0	0.1
WBGene00016095	C25E10.5	0	0.1
WBGene00016097	C25E10.8	0	0.2
WBGene00016124	dnc-4	0	0.2
WBGene00016125	C26B2.2	0	0.2
WBGene00016134	C26B9.5	0	2.7
WBGene00016142	mrps-18C	0	0.6
WBGene00016150	hint-3	0	0.5
WBGene00016152	pho-12	0	0.1
WBGene00016154	C27A12.2	0	0.1
WBGene00016159	C27A12.9	0	0.1
WBGene00016167	vps-22	0	0.5
WBGene00016178	mesp-1	0	0.4
WBGene00016191	C28G1.6	0	0.2
WBGene00016238	C30A5.3	0	0.1
WBGene00016248	C30B5.7	0	0.2
WBGene00016255	C30E1.6	0	0.3
WBGene00016258	vha-16	0	1.6
WBGene00016264	C30F12.5	0	0.7
WBGene00016266	idhg-2	0	0.9
WBGene00016268	C30G4.2	0	0.3
WBGene00016269	C30G4.4	0	0.1
WBGene00016278	C30H7.2	0	0.7
WBGene00016305	fbxc-57	0	0.2
WBGene00016311	C32D5.3	0	1
WBGene00016315	C32D5.7	0	0.3
WBGene00016316	C32D5.8	0	1.1
WBGene00016322	C32E8.4	0	0.7
WBGene00016327	C32E12.1	0	0.4
WBGene00016332	C32F10.4	0	0.5
WBGene00016335	gba-1	0	0.1
WBGene00016342	C33C12.10	0	0.4
WBGene00016351	C33F10.1	0	0.9
WBGene00016358	C33F10.12	0	0.1
WBGene00016360	C33G8.2	0	0.8
WBGene00016368	nhr-163	0	0.3
WBGene00016378	imp-3	0	0.3
WBGene00016383	zgpa-1	0	0.2
WBGene00016386	tag-272	0	0.2
WBGene00016390	C34B2.5	0	0.2
WBGene00016396	C34B2.11	0	0.2
WBGene00016415	ampd-1	0	2.3
WBGene00016420	C34G6.3	0	0.2
WBGene00016424	C34H4.1	0	0.7
WBGene00016425	C34H4.2	0	0.4
WBGene00016428	dmsr-7	0	0.5
WBGene00016440	gipc-1	0	1.6
WBGene00016446	C35D10.10	0	0.3
WBGene00016450	clec-5	0	0.2
WBGene00016456	C35E7.4	0	0.1
WBGene00016469	C36B7.6	0	0.1
WBGene00016489	C36E6.1	0	0.1
WBGene00016501	C37C3.9	0	0.1
WBGene00016502	C37C3.10	0	0.5
WBGene00016507	abhd-5.2	0	1.2
WBGene00016511	C37H5.13	0	0.2
WBGene00016524	C39B5.6	0	0.1
WBGene00016542	C39H7.4	0	1
WBGene00016566	eri-7	0	0.3
WBGene00016580	C42C1.2	0	0.1
WBGene00016585	oac-59	0	0.3
WBGene00016588	hpo-12	0	1.1
WBGene00016592	erl-1	0	0.5
WBGene00016595	C42D4.2	0	0.9
WBGene00016607	C43E11.9	0	0.4
WBGene00016620	dhhc-9	0	0.3
WBGene00016631	C44B7.11	0	0.6
WBGene00016643	vps-45	0	0.9
WBGene00016646	fbxc-5	0	1
WBGene00016671	C45G7.4	0	0.3
WBGene00016676	C45G9.5	0	0.2
WBGene00016677	C45G9.6	0	1.5
WBGene00016680	C45G9.9	0	0.1
WBGene00016725	C46H3.2	0	1.1
WBGene00016728	C46H11.2	0	0.4
WBGene00016750	let-611	0	0.2
WBGene00016751	C48E7.6	0	0.4
WBGene00016752	C48E7.7	0	1.1
WBGene00016757	C49A9.3	0	1
WBGene00016759	C49A9.5	0	1.9
WBGene00016763	C49A9.9	0	1.7
WBGene00016769	C49C8.5	0	0.7
WBGene00016785	C49G7.7	0	1.3
WBGene00016790	C49H3.3	0	1.2
WBGene00016803	bath-42	0	0.5
WBGene00016817	C50E3.6	0	0.6
WBGene00016862	C52A10.1	0	0.1
WBGene00016874	C52B11.5	0	0.1
WBGene00016877	C52D10.3	0	0.1
WBGene00016892	C53A3.2	0	0.7
WBGene00016903	mar-4	0	0.3
WBGene00016918	test-1	0	0.8
WBGene00016957	atic-1	0	0.4
WBGene00016968	epg-5	0	1.2
WBGene00016971	toe-2	0	0.1
WBGene00016976	C56E10.3	0	0.3
WBGene00016978	C56G2.3	0	0.1
WBGene00016981	rpn-13	0	0.1
WBGene00016984	npr-8	0	0.1
WBGene00016998	D1005.4	0	0.1
WBGene00017003	D1007.5	0	0.5
WBGene00017013	ensh-1	0	0.1
WBGene00017031	D1044.6	0	0.7
WBGene00017063	mctp-1	0	0.2
WBGene00017064	ppfr-2	0	0.1
WBGene00017071	aagr-1	0	0.2
WBGene00017073	D2096.6	0	0.1
WBGene00017079	D2096.12	0	0.1
WBGene00017080	lec-12	0	0.1
WBGene00017093	E02C12.8	0	0.5
WBGene00017101	E02H9.3	0	0.6
WBGene00017108	cyp-43A1	0	0.4
WBGene00017112	E03H12.5	0	0.3
WBGene00017119	E04A4.5	0	0.9
WBGene00017123	maoc-1	0	1
WBGene00017125	acdh-12	0	0.4
WBGene00017137	pink-1	0	0.6
WBGene00017144	brap-2	0	0.1
WBGene00017154	ugt-57	0	1.3
WBGene00017178	atg-16.1	0	0.2
WBGene00017190	F07B7.12	0	0.2
WBGene00017195	glo-4	0	0.6
WBGene00017217	F07F6.4	0	1.2
WBGene00017238	F08B4.7	0	0.2
WBGene00017241	pcyt-1	0	0.9
WBGene00017245	srpa-72	0	0.6
WBGene00017268	hmgr-1	0	0.3
WBGene00017273	gos-28	0	0.2
WBGene00017283	F09E5.3	0	0.7
WBGene00017286	F09E5.8	0	0.2
WBGene00017297	F09E10.7	0	0.3
WBGene00017298	toca-1	0	1.3
WBGene00017300	rpc-2	0	0.9
WBGene00017302	F09F7.5	0	0.4
WBGene00017306	F09F9.1	0	0.5
WBGene00017309	F09F9.4	0	0.2
WBGene00017310	F09G2.1	0	0.1
WBGene00017319	mrps-9	0	0.1
WBGene00017322	clec-160	0	0.6
WBGene00017335	F10D2.10	0	0.2
WBGene00017336	ugt-41	0	0.6
WBGene00017342	F10D7.5	0	0.9
WBGene00017347	F10E7.5	0	0.4
WBGene00017354	F10E9.2	0	0.2
WBGene00017361	F10E9.12	0	0.2
WBGene00017362	F10G2.1	0	0.2
WBGene00017416	F13B6.1	0	0.7
WBGene00017417	F13B6.2	0	0.2
WBGene00017418	F13B6.3	0	14.6
WBGene00017429	F13D11.4	0	0.1
WBGene00017434	F13H8.1	0	1.4
WBGene00017435	F13H8.2	0	0.4
WBGene00017436	F13H8.3	0	0.4
WBGene00017440	upb-1	0	0.2
WBGene00017445	sid-5	0	0.3
WBGene00017447	F14B8.5	0	0.6
WBGene00017448	F14B8.6	0	0.5
WBGene00017449	otpl-3	0	0.2
WBGene00017464	sulp-2	0	0.2
WBGene00017468	F14F9.5	0	0.5
WBGene00017478	F15A8.6	0	0.4
WBGene00017480	nstp-2	0	0.6
WBGene00017504	F16B4.2	0	0.1
WBGene00017537	F17A9.5	0	0.6
WBGene00017542	F17E9.5	0	0.3
WBGene00017546	rpa-1	0	0.4
WBGene00017565	ddo-2	0	0.2
WBGene00017567	F18E3.11	0	0.1
WBGene00017569	F18E9.3	0	0.1
WBGene00017576	cdh-8	0	0.5
WBGene00017578	drl-1	0	0.1
WBGene00017582	F18G5.6	0	0.2
WBGene00017584	F19B10.2	0	0.1
WBGene00017591	F19C7.1	0	2.7
WBGene00017642	F20D12.2	0	0.1
WBGene00017643	czw-1	0	0.2
WBGene00017663	F21D12.3	0	0.6
WBGene00017687	ets-4	0	0.5
WBGene00017692	F22B7.1	0	0.1
WBGene00017698	F22B7.9	0	0.5
WBGene00017701	F22D3.5	0	0.3
WBGene00017702	F22D3.6	0	0.4
WBGene00017703	F22E5.1	0	0.5
WBGene00017717	F22F4.4	0	0.7
WBGene00017719	ldp-1	0	1.7
WBGene00017720	F22F7.2	0	0.4
WBGene00017741	F23C8.13	0	0.1
WBGene00017765	gcst-1	0	0.8
WBGene00017766	peli-1	0	0.1
WBGene00017767	F25B4.4	0	0.1
WBGene00017769	hmgs-1	0	0.3
WBGene00017777	F25B5.6	0	0.3
WBGene00017786	F25E5.5	0	0.1
WBGene00017799	F25G6.8	0	0.3
WBGene00017808	nspd-9	0	0.2
WBGene00017828	F26F4.6	0	0.1
WBGene00017837	F26G1.1	0	0.2
WBGene00017851	F27C1.1	0	0.8
WBGene00017874	acdh-9	0	0.2
WBGene00017879	acd-4	0	0.2
WBGene00017881	asp-13	0	0.2
WBGene00017926	F29C4.2	0	0.3
WBGene00017929	grld-1	0	0.1
WBGene00017931	picc-1	0	0.1
WBGene00017947	mth-2	0	0.3
WBGene00017954	F31E8.4	0	0.6
WBGene00017957	F31F4.1	0	0.4
WBGene00017968	skpo-3	0	2
WBGene00017971	F32A5.8	0	0.3
WBGene00017979	F32B5.6	0	0.4
WBGene00017984	F32D1.5	0	0.3
WBGene00017989	nol-10	0	0.5
WBGene00018006	hpo-3	0	0.2
WBGene00018013	phf-10	0	0.1
WBGene00018015	F33G12.3	0	0.4
WBGene00018017	golg-2	0	0.2
WBGene00018044	F35D11.3	0	0.4
WBGene00018119	F36H12.3	0	0.7
WBGene00018121	F36H12.5	0	0.2
WBGene00018132	F37A4.2	0	0.3
WBGene00018140	F37B4.10	0	0.1
WBGene00018149	F37C12.1	0	0.1
WBGene00018155	F37C12.14	0	0.1
WBGene00018159	F37F2.2	0	0.1
WBGene00018178	F38E1.3	0	0.1
WBGene00018195	btb-16	0	0.2
WBGene00018216	F40A3.1	0	0.2
WBGene00018218	F40A3.3	0	0.3
WBGene00018221	F40A3.6	0	0.3
WBGene00018226	F40B5.2	0	0.3
WBGene00018238	F40F4.7	0	0.5
WBGene00018255	F40H6.5	0	0.2
WBGene00018257	F41B4.1	0	0.2
WBGene00018260	cyp-33C7	0	0.2
WBGene00018264	cyp-33C6	0	0.4
WBGene00018265	nhr-182	0	0.1
WBGene00018268	F41C3.2	0	0.3
WBGene00018270	F41C3.4	0	0.2
WBGene00018271	F41C3.5	0	1.5
WBGene00018274	F41C3.8	0	0.3
WBGene00018286	F41E6.5	0	0.3
WBGene00018288	F41E6.7	0	0.2
WBGene00018290	vps-60	0	0.7
WBGene00018314	F41H10.1	0	0.2
WBGene00018321	sand-1	0	0.2
WBGene00018339	abcf-3	0	0.5
WBGene00018359	F42G8.8	0	0.2
WBGene00018364	dagl-2	0	0.7
WBGene00018367	F42H10.3	0	0.6
WBGene00018374	tag-343	0	1.6
WBGene00018376	F43C9.2	0	0.3
WBGene00018393	msra-1	0	0.4
WBGene00018398	sptl-2	0	1.2
WBGene00018403	F44A2.3	0	0.1
WBGene00018418	F44E2.4	0	0.4
WBGene00018470	F45E4.5	0	0.5
WBGene00018471	F45E4.6	0	0.4
WBGene00018509	F46F11.6	0	2.3
WBGene00018512	trpp-8	0	1.4
WBGene00018522	F46H5.7	0	1.5
WBGene00018572	lin-42	0	3.4
WBGene00018586	ubxn-3	0	0.5
WBGene00018602	F48D6.4	0	0.2
WBGene00018612	disl-2	0	2
WBGene00018636	F49E8.2	0	0.1
WBGene00018638	F49E8.7	0	0.9
WBGene00018674	F52C9.3	0	0.2
WBGene00018678	F52C12.1	0	0.1
WBGene00018679	F52C12.2	0	0.1
WBGene00018693	F52E1.3	0	0.1
WBGene00018704	ztf-13	0	0.8
WBGene00018711	F52G3.3	0	0.1
WBGene00018720	F53A3.1	0	0.2
WBGene00018724	F53A9.1	0	0.6
WBGene00018729	F53A9.6	0	0.5
WBGene00018730	F53A9.7	0	1.7
WBGene00018732	F53A9.9	0	0.3
WBGene00018735	F53B1.2	0	0.1
WBGene00018744	F53B3.6	0	0.3
WBGene00018755	bcmo-2	0	0.1
WBGene00018760	irg-3	0	1.5
WBGene00018779	F53H8.3	0	1.3
WBGene00018787	cutl-20	0	1.7
WBGene00018798	gnrr-1	0	0.1
WBGene00018802	F54D8.6	0	0.5
WBGene00018836	F54F2.9	0	0.3
WBGene00018837	F54G2.1	0	0.2
WBGene00018847	mar-6	0	0.1
WBGene00018854	nlf-1	0	0.7
WBGene00018864	F55A12.5	0	1.2
WBGene00018877	aman-1	0	0.5
WBGene00018886	npr-28	0	0.6
WBGene00018909	slx-1	0	0.4
WBGene00018937	F56B6.6	0	0.1
WBGene00018939	fbxa-190	0	0.6
WBGene00018945	F56C3.8	0	0.2
WBGene00018946	F56C3.9	0	0.4
WBGene00018951	F56C9.7	0	0.1
WBGene00018965	F56D2.3	0	0.3
WBGene00018966	F56D2.5	0	0.4
WBGene00018971	clec-67	0	0.3
WBGene00018984	F56F10.1	0	0.6
WBGene00019006	spg-20	0	0.5
WBGene00019009	clec-90	0	0.1
WBGene00019013	tofu-4	0	0.4
WBGene00019017	F57F4.4	0	1.8
WBGene00019018	abts-3	0	0.8
WBGene00019020	F57H12.5	0	0.8
WBGene00019030	exc-6	0	0.7
WBGene00019057	F58F9.3	0	0.8
WBGene00019058	F58F9.4	0	0.6
WBGene00019060	F58F9.7	0	0.7
WBGene00019075	F59A3.2	0	0.1
WBGene00019105	asp-8	0	0.2
WBGene00019115	nhr-195	0	0.1
WBGene00019146	H02F09.3	0	0.8
WBGene00019155	H04M03.11	0	0.4
WBGene00019158	H05C05.2	0	0.4
WBGene00019170	H06I04.6	0	0.3
WBGene00019188	H11E01.3	0	0.9
WBGene00019199	H14E04.2	0	0.2
WBGene00019213	H20E11.1	0	1.1
WBGene00019250	H28G03.2	0	0.3
WBGene00019273	H43E16.1	0	1.9
WBGene00019276	H43I07.3	0	0.1
WBGene00019282	mps-2	0	1.7
WBGene00019290	K02A2.5	0	0.6
WBGene00019294	K02A6.3	0	0.3
WBGene00019295	pfkb-1.2	0	0.1
WBGene00019298	K02D7.1	0	0.5
WBGene00019320	K02E10.6	0	0.5
WBGene00019328	clec-149	0	0.1
WBGene00019332	K02F3.9	0	0.1
WBGene00019351	lron-7	0	2
WBGene00019365	rei-2	0	0.4
WBGene00019381	K04C2.3	0	0.5
WBGene00019399	K04F10.7	0	1.1
WBGene00019400	K04G7.1	0	0.2
WBGene00019402	K04G7.11	0	0.1
WBGene00019403	K05B2.2	0	1.2
WBGene00019410	K05F1.9	0	0.5
WBGene00019434	nmtn-1	0	0.2
WBGene00019444	frpr-11	0	0.2
WBGene00019477	K07C11.4	0	0.3
WBGene00019478	cri-2	0	0.1
WBGene00019481	cogc-6	0	0.5
WBGene00019487	ephx-1	0	0.7
WBGene00019489	K07E1.1	0	0.2
WBGene00019493	catp-5	0	0.5
WBGene00019495	sdz-24	0	3.7
WBGene00019513	K08A2.4	0	0.3
WBGene00019516	ugt-20	0	0.6
WBGene00019532	K08D10.9	0	0.2
WBGene00019543	cif-1	0	0.4
WBGene00019546	glct-6	0	0.1
WBGene00019554	K09C4.10	0	0.3
WBGene00019587	K09F6.4	0	0.3
WBGene00019590	K09F6.7	0	0.4
WBGene00019592	K09F6.9	0	0.2
WBGene00019595	K09H9.2	0	0.1
WBGene00019615	K10B4.3	0	0.3
WBGene00019617	K10C2.1	0	7.2
WBGene00019619	asp-14	0	2.1
WBGene00019620	fah-1	0	0.4
WBGene00019623	K10C9.1	0	0.1
WBGene00019629	cid-1	0	0.2
WBGene00019645	swt-7	0	0.5
WBGene00019647	K11D12.7	0	0.6
WBGene00019655	K11G9.5	0	0.1
WBGene00019659	K11H12.3	0	0.3
WBGene00019664	K11H12.8	0	1.7
WBGene00019673	K12C11.1	0	0.2
WBGene00019677	K12H4.2	0	0.4
WBGene00019686	K12H6.6	0	0.4
WBGene00019713	pqn-52	0	0.9
WBGene00019733	M02E1.1	0	0.3
WBGene00019744	M02H5.8	0	1.7
WBGene00019759	M03F4.6	0	0.5
WBGene00019762	M03F8.3	0	0.1
WBGene00019774	M04G7.3	0	0.1
WBGene00019786	M70.4	0	0.3
WBGene00019787	M70.5	0	0.1
WBGene00019813	ger-1	0	0.7
WBGene00019820	cogc-8	0	0.5
WBGene00019838	R02F2.9	0	0.4
WBGene00019846	gpx-7	0	0.1
WBGene00019847	R03G5.6	0	0.6
WBGene00019880	R05D3.6	0	0.1
WBGene00019883	met-2	0	0.1
WBGene00019892	R05F9.9	0	0.2
WBGene00019896	R05G6.1	0	0.2
WBGene00019902	R05G6.10	0	0.8
WBGene00019907	R05H11.1	0	0.2
WBGene00019915	tbc-10	0	0.2
WBGene00019932	R07C12.2	0	0.8
WBGene00019957	R08E3.1	0	3.4
WBGene00019965	R08F11.1	0	0.5
WBGene00019975	flp-34	0	0.2
WBGene00019983	sti-1	0	0.2
WBGene00019986	R09F10.1	0	0.6
WBGene00019988	R09F10.5	0	0.2
WBGene00019993	rbx-2	0	0.9
WBGene00019998	R10H1.1	0	0.1
WBGene00020007	R11F4.1	0	1
WBGene00020008	R11F4.2	0	0.1
WBGene00020012	R11G1.6	0	0.1
WBGene00020018	R12B2.2	0	0.1
WBGene00020022	R12C12.1	0	2
WBGene00020029	R12C12.9	0	0.3
WBGene00020035	egg-5	0	0.1
WBGene00020069	R13H7.2	0	0.4
WBGene00020075	math-35	0	1
WBGene00020088	R119.2	0	0.4
WBGene00020094	wip-1	0	0.7
WBGene00020095	R144.5	0	0.6
WBGene00020101	lmtr-5	0	0.4
WBGene00020104	R148.5	0	0.1
WBGene00020106	R151.1	0	0.3
WBGene00020139	T01B11.2	0	0.3
WBGene00020142	aak-2	0	0.1
WBGene00020146	got-1.2	0	0.7
WBGene00020169	mmaa-1	0	0.2
WBGene00020184	uba-5	0	0.6
WBGene00020212	T04D1.2	0	1.3
WBGene00020229	T05A8.3	0	1.5
WBGene00020259	T05E7.3	0	0.3
WBGene00020280	T06A1.5	0	0.2
WBGene00020294	T06F4.1	0	0.3
WBGene00020300	tag-261	0	0.1
WBGene00020307	T07D3.4	0	0.1
WBGene00020321	T07F12.1	0	0.3
WBGene00020322	T07F12.2	0	0.4
WBGene00020329	bath-26	0	0.1
WBGene00020330	T07H6.1	0	0.4
WBGene00020334	epg-7	0	0.9
WBGene00020340	T08B1.1	0	0.1
WBGene00020341	T08B1.4	0	0.2
WBGene00020348	mrpl-23	0	0.1
WBGene00020350	T08B2.12	0	0.1
WBGene00020366	acdh-10	0	0.8
WBGene00020369	T08H10.1	0	0.2
WBGene00020373	gpx-6	0	0.9
WBGene00020413	T10E9.3	0	1.1
WBGene00020417	nuo-2	0	0.1
WBGene00020456	fbxa-60	0	0.4
WBGene00020463	cec-6	0	0.4
WBGene00020471	pho-14	0	0.1
WBGene00020486	T13C5.6	0	0.3
WBGene00020488	T13G4.1	0	0.4
WBGene00020490	tmc-1	0	0.2
WBGene00020491	T13G4.4	0	0.1
WBGene00020497	T14A8.2	0	0.3
WBGene00020504	svh-2	0	1.1
WBGene00020516	T15B7.1	0	0.5
WBGene00020517	hpo-8	0	0.7
WBGene00020530	T15B12.1	0	0.6
WBGene00020577	T19D12.2	0	0.2
WBGene00020579	T19D12.4	0	2.3
WBGene00020585	clec-178	0	0.2
WBGene00020596	oga-1	0	1.6
WBGene00020601	T20B12.3	0	0.3
WBGene00020604	T20B12.7	0	0.5
WBGene00020625	mrrf-1	0	0.1
WBGene00020630	T20F7.1	0	0.1
WBGene00020636	T20H4.5	0	0.1
WBGene00020649	sma-10	0	1.3
WBGene00020652	egg-4	0	0.1
WBGene00020661	smz-2	0	0.1
WBGene00020663	cutl-22	0	0.5
WBGene00020705	T22H9.1	0	0.2
WBGene00020715	nspd-4	0	0.1
WBGene00020725	cnp-3	0	2.1
WBGene00020738	T23F2.5	0	0.2
WBGene00020741	dlhd-1	0	0.4
WBGene00020759	T24C4.3	0	0.3
WBGene00020760	T24C4.4	0	0.8
WBGene00020761	T24C4.5	0	0.1
WBGene00020774	T24E12.5	0	1.4
WBGene00020779	T24G10.2	0	0.5
WBGene00020788	nep-22	0	1.7
WBGene00020799	T25D10.1	0	2.1
WBGene00020811	T25G12.3	0	0.9
WBGene00020812	acdh-7	0	0.1
WBGene00020831	T26C12.1	0	0.2
WBGene00020840	spch-3	0	0.6
WBGene00020842	T27A3.6	0	0.3
WBGene00020852	nhr-228	0	0.4
WBGene00020860	nspd-10	0	0.5
WBGene00020869	T28A11.2	0	0.1
WBGene00020883	fbxa-64	0	0.1
WBGene00020886	ttr-6	0	0.1
WBGene00020890	fbxa-202	0	0.2
WBGene00020895	T28D9.3	0	0.8
WBGene00020904	T28F12.1	0	0.1
WBGene00020909	W01A11.1	0	0.9
WBGene00020917	W01B11.6	0	1.3
WBGene00020952	kel-8	0	0.5
WBGene00020994	W03F8.4	0	0.2
WBGene00020999	W03F9.1	0	1.5
WBGene00021004	W03F9.10	0	0.9
WBGene00021022	W04B5.5	0	0.2
WBGene00021044	W05H7.1	0	0.2
WBGene00021049	W05H9.2	0	0.7
WBGene00021058	vps-18	0	0.1
WBGene00021059	atat-2	0	0.1
WBGene00021061	W06E11.1	0	0.1
WBGene00021073	nol-1	0	0.6
WBGene00021074	W07E6.2	0	0.1
WBGene00021093	W08F4.3	0	0.2
WBGene00021103	eri-3	0	0.3
WBGene00021112	W09C3.4	0	0.5
WBGene00021113	gsp-3	0	0.1
WBGene00021132	nfyb-1	0	0.3
WBGene00021149	dnc-3	0	0.8
WBGene00021155	Y4C6B.1	0	0.2
WBGene00021156	Y4C6B.2	0	0.3
WBGene00021161	Y4C6B.7	0	0.2
WBGene00021238	gap-3	0	0.8
WBGene00021239	Y20F4.4	0	0.8
WBGene00021264	fbxa-13	0	0.1
WBGene00021305	zig-11	0	0.2
WBGene00021313	paqr-2	0	0.4
WBGene00021322	Y34B4A.6	0	0.8
WBGene00021323	Y34B4A.7	0	0.5
WBGene00021327	mrpl-38	0	0.7
WBGene00021329	Y34D9A.3	0	0.1
WBGene00021331	glrx-10	0	0.7
WBGene00021332	Y34D9A.7	0	1.1
WBGene00021342	Y35H6.3	0	0.1
WBGene00021343	cutl-23	0	0.5
WBGene00021348	moag-4	0	0.1
WBGene00021355	Y37E3.17	0	1
WBGene00021366	Y37E11AM.2	0	0.3
WBGene00021367	Y37E11AM.3	0	0.1
WBGene00021375	Y37E11B.2	0	0.1
WBGene00021394	Y38C1AA.1	0	0.2
WBGene00021396	cutl-24	0	0.3
WBGene00021402	Y38C1AA.12	0	0.2
WBGene00021404	trpl-3	0	0.2
WBGene00021406	frm-5.2	0	0.3
WBGene00021427	Y38F2AR.9	0	0.3
WBGene00021444	ttc-7	0	1.6
WBGene00021452	Y39F10A.1	0	0.2
WBGene00021460	zwl-1	0	0.6
WBGene00021470	tpxl-1	0	0.1
WBGene00021473	sydn-1	0	0.4
WBGene00021476	nsun-4	0	0.3
WBGene00021487	comt-3	0	0.4
WBGene00021509	Y41D4A.7	0	0.3
WBGene00021510	frpr-19	0	0.2
WBGene00021518	hpo-6	0	2.2
WBGene00021520	Y41D4B.18	0	0.5
WBGene00021531	Y42G9A.1	0	0.7
WBGene00021536	Y42H9AR.1	0	0.6
WBGene00021541	Y42H9B.3	0	0.3
WBGene00021548	trx-4	0	0.2
WBGene00021549	Y44E3A.4	0	1.1
WBGene00021556	Y45G5AM.3	0	0.3
WBGene00021564	Y45G12B.3	0	0.1
WBGene00021589	Y46D2A.1	0	0.1
WBGene00021596	spsb-2	0	0.2
WBGene00021599	srt-42	0	1.7
WBGene00021600	Y46H3A.4	0	0.2
WBGene00021601	Y46H3A.5	0	0.2
WBGene00021607	Y46H3C.7	0	0.2
WBGene00021633	Y47G6A.3	0	0.2
WBGene00021635	Y47G6A.5	0	0.3
WBGene00021655	Y48A5A.1	0	0.1
WBGene00021661	mbtr-1	0	0.2
WBGene00021735	Y50D4A.1	0	0.2
WBGene00021749	Y50D4C.5	0	0.2
WBGene00021757	taco-1	0	0.4
WBGene00021765	Y51F10.4	0	0.3
WBGene00021766	hex-4	0	0.3
WBGene00021808	Y53G8AM.8	0	0.2
WBGene00021813	Y53G8AR.6	0	0.5
WBGene00021819	Y53G8B.3	0	0.2
WBGene00021829	mrpl-17	0	0.2
WBGene00021846	ztf-23	0	0.6
WBGene00021856	Y54F10BM.1	0	0.7
WBGene00021879	clec-83	0	1.2
WBGene00021893	ndnf-1	0	0.2
WBGene00021895	clec-84	0	0.9
WBGene00021901	tag-262	0	0.2
WBGene00021906	Y55B1AR.2	0	0.6
[truncated: 262 more rows]

## Sheet: GOCC enrichment
Category	Term	Count	%	PValue	Genes	List Total	Pop Hits	Pop Total	Fold Enrichment	Bonferroni	Benjamini	FDR
GOTERM_CC_DIRECT	GO:0005737~cytoplasm	238	10.5263	1.62453e-05	WBGENE00020334, WBGENE00022199, WBGENE00006703, WBGENE00003435, WBGENE00006704, WBGENE00010096, WBGENE00003796, WBGENE00004885, WBGENE00003432, WBGENE00017283, WBGENE00006943, WBGENE00000963, WBGENE00003442, WBGENE00010888, WBGENE00010887, WBGENE00020101, WBGENE00000836, WBGENE00011050, WBGENE00013111, WBGENE00016981, WBGENE00003424, WBGENE00004995, WBGENE00000156, WBGENE00006816, WBGENE00004758,…	1392	1518	11373	1.28098	0.00644484	0.00215521	0.00213897
GOTERM_CC_DIRECT	GO:0005886~plasma membrane	95	4.20168	0.00441677	WBGENE00003839, WBGENE00015263, WBGENE00007918, WBGENE00020012, WBGENE00001135, WBGENE00003478, WBGENE00004962, WBGENE00001651, WBGENE00000401, WBGENE00000565, WBGENE00000524, WBGENE00003877, WBGENE00004921, WBGENE00000402, WBGENE00010567, WBGENE00008214, WBGENE00008777, WBGENE00007203, WBGENE00013914, WBGENE00006797, WBGENE00002991, WBGENE00007561, WBGENE00000051, WBGENE00004374, WBGENE00019615,…	1392	593	11373	1.30889	0.828259	0.195426	0.193953
GOTERM_CC_DIRECT	GO:0005739~mitochondrion	87	3.84785	1.0873e-06	WBGENE00044344, WBGENE00020530, WBGENE00000206, WBGENE00007918, WBGENE00010809, WBGENE00017125, WBGENE00020417, WBGENE00021548, WBGENE00022516, WBGENE00009812, WBGENE00020812, WBGENE00000766, WBGENE00011938, WBGENE00014202, WBGENE00015776, WBGENE00015413, WBGENE00017119, WBGENE00012463, WBGENE00009187, WBGENE00015814, WBGENE00011897, WBGENE00015778, WBGENE00017319, WBGENE00010645, WBGENE00016142,…	1392	424	11373	1.67644	0.000432652	0.000216373	0.000214742
GOTERM_CC_DIRECT	GO:0005783~endoplasmic reticulum	48	2.12295	0.000270911	WBGENE00022678, WBGENE00016592, WBGENE00021367, WBGENE00016278, WBGENE00016631, WBGENE00017268, WBGENE00001476, WBGENE00002147, WBGENE00017063, WBGENE00020999, WBGENE00008528, WBGENE00022856, WBGENE00008775, WBGENE00008258, WBGENE00006597, WBGENE00002891, WBGENE00011917, WBGENE00011474, WBGENE00014025, WBGENE00014204, WBGENE00015510, WBGENE00011037, WBGENE00011017, WBGENE00001405, WBGENE00015492,…	1392	231	11373	1.69772	0.102226	0.0215645	0.021402
GOTERM_CC_DIRECT	GO:0005615~extracellular space	45	1.99027	0.0134683	WBGENE00021984, WBGENE00000789, WBGENE00019986, WBGENE00020373, WBGENE00013540, WBGENE00016595, WBGENE00022276, WBGENE00015067, WBGENE00020330, WBGENE00004249, WBGENE00020516, WBGENE00000784, WBGENE00001452, WBGENE00000783, WBGENE00003751, WBGENE00022515, WBGENE00007516, WBGENE00010440, WBGENE00015930, WBGENE00013874, WBGENE00012762, WBGENE00013895, WBGENE00000217, WBGENE00022026, WBGENE00012382,…	1392	258	11373	1.42505	0.995469	0.536038	0.531997
GOTERM_CC_DIRECT	GO:0005856~cytoskeleton	36	1.59222	0.0870029	WBGENE00003435, WBGENE00003432, WBGENE00000200, WBGENE00021406, WBGENE00006988, WBGENE00000204, WBGENE00006993, WBGENE00000072, WBGENE00003442, WBGENE00004212, WBGENE00003463, WBGENE00002694, WBGENE00010888, WBGENE00019410, WBGENE00022002, WBGENE00003424, WBGENE00003468, WBGENE00004953, WBGENE00003446, WBGENE00003467, WBGENE00003466, WBGENE00003443, WBGENE00003465, WBGENE00004213, WBGENE00006816,…	1392	227	11373	1.29572	1	1	0.994962
GOTERM_CC_DIRECT	GO:0045121~membrane raft	35	1.54799	2.38931e-13	WBGENE00003959, WBGENE00021589, WBGENE00003958, WBGENE00003957, WBGENE00006609, WBGENE00016134, WBGENE00002268, WBGENE00002267, WBGENE00020579, WBGENE00010070, WBGENE00008634, WBGENE00010660, WBGENE00016425, WBGENE00019659, WBGENE00016424, WBGENE00044073, WBGENE00019617, WBGENE00022644, WBGENE00007807, WBGENE00044457, WBGENE00019017, WBGENE00018984, WBGENE00019213, WBGENE00021518, WBGENE00009429,…	1392	72	11373	3.97165	9.50902e-11	9.50945e-11	9.43777e-11
GOTERM_CC_DIRECT	GO:0030054~cell junction	27	1.19416	0.0785935	WBGENE00007918, WBGENE00001135, WBGENE00044008, WBGENE00002129, WBGENE00020952, WBGENE00004921, WBGENE00006774, WBGENE00006797, WBGENE00013914, WBGENE00002991, WBGENE00000051, WBGENE00002133, WBGENE00000395, WBGENE00017931, WBGENE00022180, WBGENE00018367, WBGENE00002136, WBGENE00002137, WBGENE00000156, WBGENE00006875, WBGENE00001588, WBGENE00002139, WBGENE00022702, WBGENE00006365, WBGENE00012759,…	1392	160	11373	1.37873	1	1	0.994962
GOTERM_CC_DIRECT	GO:0005789~endoplasmic reticulum membrane	26	1.14993	0.0576885	WBGENE00016592, WBGENE00016631, WBGENE00017268, WBGENE00001399, WBGENE00001476, WBGENE00002147, WBGENE00008775, WBGENE00002071, WBGENE00007743, WBGENE00010408, WBGENE00019276, WBGENE00001405, WBGENE00015492, WBGENE00000198, WBGENE00022629, WBGENE00000896, WBGENE00007626, WBGENE00004361, WBGENE00007556, WBGENE00007435, WBGENE00010254, WBGENE00010670, WBGENE00002043, WBGENE00016159, WBGENE00011488,…	1392	148	11373	1.43532	1	1	0.994962
GOTERM_CC_DIRECT	GO:0005794~Golgi apparatus	25	1.10571	0.0953078	WBGENE00023404, WBGENE00022678, WBGENE00001636, WBGENE00019820, WBGENE00018017, WBGENE00003258, WBGENE00004368, WBGENE00000585, WBGENE00000302, WBGENE00019481, WBGENE00018270, WBGENE00005020, WBGENE00004278, WBGENE00006590, WBGENE00011037, WBGENE00001505, WBGENE00017273, WBGENE00001629, WBGENE00001508, WBGENE00044618, WBGENE00006785, WBGENE00004063, WBGENE00006940, WBGENE00002220, WBGENE00004286	1392	149	11373	1.37085	1	1	0.994962
GOTERM_CC_DIRECT	GO:0000139~Golgi membrane	20	0.884564	0.0466928	WBGENE00001636, WBGENE00019820, WBGENE00001505, WBGENE00017273, WBGENE00022577, WBGENE00001629, WBGENE00000585, WBGENE00020018, WBGENE00000302, WBGENE00019481, WBGENE00044618, WBGENE00018270, WBGENE00007626, WBGENE00008258, WBGENE00005020, WBGENE00002071, WBGENE00006785, WBGENE00004063, WBGENE00006940, WBGENE00009277	1392	104	11373	1.5712	1	1	0.994962
GOTERM_CC_DIRECT	GO:0016324~apical plasma membrane	17	0.75188	0.0030839	WBGENE00017298, WBGENE00000822, WBGENE00004876, WBGENE00003995, WBGENE00003478, WBGENE00003730, WBGENE00002299, WBGENE00004796, WBGENE00006915, WBGENE00000302, WBGENE00003877, WBGENE00010621, WBGENE00003475, WBGENE00009882, WBGENE00007561, WBGENE00000493, WBGENE00015648	1392	63	11373	2.20467	0.707499	0.175341	0.17402
GOTERM_CC_DIRECT	GO:0031143~pseudopodium	15	0.663423	0.000121175	WBGENE00021113, WBGENE00003424, WBGENE00003435, WBGENE00003446, WBGENE00003468, WBGENE00003467, WBGENE00003466, WBGENE00003443, WBGENE00003432, WBGENE00003465, WBGENE00003470, WBGENE00003442, WBGENE00003463, WBGENE00003452, WBGENE00009680	1392	39	11373	3.14241	0.0470858	0.0120569	0.011966
GOTERM_CC_DIRECT	GO:0005759~mitochondrial matrix	15	0.663423	0.0181502	WBGENE00020366, WBGENE00022862, WBGENE00001155, WBGENE00012713, WBGENE00008456, WBGENE00008435, WBGENE00007197, WBGENE00009563, WBGENE00014202, WBGENE00015413, WBGENE00017777, WBGENE00009187, WBGENE00015814, WBGENE00012920, WBGENE00013218	1392	63	11373	1.9453	0.999318	0.656709	0.651759
GOTERM_CC_DIRECT	GO:0005874~microtubule	14	0.619195	0.0801708	WBGENE00021059, WBGENE00002224, WBGENE00044008, WBGENE00019030, WBGENE00002216, WBGENE00002227, WBGENE00013847, WBGENE00008887, WBGENE00004212, WBGENE00003178, WBGENE00003175, WBGENE00021470, WBGENE00012489, WBGENE00010888	1392	70	11373	1.63405	1	1	0.994962
GOTERM_CC_DIRECT	GO:0000502~proteasome complex	13	0.574967	0.000797548	WBGENE00003949, WBGENE00003947, WBGENE00016981, WBGENE00003952, WBGENE00004468, WBGENE00003951, WBGENE00003923, WBGENE00004506, WBGENE00004505, WBGENE00004503, WBGENE00004461, WBGENE00004463, WBGENE00010309	1392	36	11373	2.95037	0.27207	0.052904	0.0525052
GOTERM_CC_DIRECT	GO:0005777~peroxisome	10	0.442282	0.0362834	WBGENE00000081, WBGENE00020366, WBGENE00004058, WBGENE00004201, WBGENE00013220, WBGENE00013541, WBGENE00019060, WBGENE00004059, WBGENE00020812, WBGENE00001566	1392	38	11373	2.15007	1	1	0.994962
GOTERM_CC_DIRECT	GO:0016323~basolateral plasma membrane	9	0.398054	0.00441917	WBGENE00017298, WBGENE00000393, WBGENE00017741, WBGENE00010340, WBGENE00017464, WBGENE00002299, WBGENE00015648, WBGENE00013963, WBGENE00003943	1392	23	11373	3.19706	0.828424	0.195426	0.193953
GOTERM_CC_DIRECT	GO:0005768~endosome	9	0.398054	0.0961383	WBGENE00021058, WBGENE00017445, WBGENE00004278, WBGENE00004975, WBGENE00011972, WBGENE00000247, WBGENE00006931, WBGENE00004109, WBGENE00011216	1392	39	11373	1.88544	1	1	0.994962
GOTERM_CC_DIRECT	GO:0000785~chromatin	7	0.309598	0.0761609	WBGENE00020840, WBGENE00021113, WBGENE00019595, WBGENE00020661, WBGENE00007733, WBGENE00000227, WBGENE00007307	1392	25	11373	2.28767	1	1	0.994962
GOTERM_CC_DIRECT	GO:0030117~membrane coat	5	0.221141	0.049211	WBGENE00000161, WBGENE00008476, WBGENE00000163, WBGENE00000165, WBGENE00000157	1392	12	11373	3.40427	1	1	0.994962
GOTERM_CC_DIRECT	GO:0005839~proteasome core complex	5	0.221141	0.081759	WBGENE00003949, WBGENE00003947, WBGENE00003952, WBGENE00003951, WBGENE00003923	1392	14	11373	2.91795	1	1	0.994962
GOTERM_CC_DIRECT	GO:0017119~Golgi transport complex	4	0.176913	0.0437082	WBGENE00019820, WBGENE00003258, WBGENE00000585, WBGENE00019481	1392	7	11373	4.66872	1	1	0.994962
GOTERM_CC_DIRECT	GO:0005688~U6 snRNP	4	0.176913	0.0637062	WBGENE00003079, WBGENE00003077, WBGENE00014124, WBGENE00044916	1392	8	11373	4.08513	1	1	0.994962
GOTERM_CC_DIRECT	GO:0031595~nuclear proteasome complex	4	0.176913	0.0871137	WBGENE00004461, WBGENE00004506, WBGENE00004505, WBGENE00004503	1392	9	11373	3.63123	1	1	0.994962
GOTERM_CC_DIRECT	GO:0000814~ESCRT II complex	3	0.132685	0.0411966	WBGENE00012193, WBGENE00008919, WBGENE00016167	1392	3	11373	8.17026	1	1	0.994962
GOTERM_CC_DIRECT	GO:0071014~post-mRNA release spliceosomal complex	3	0.132685	0.0757574	WBGENE00019402, WBGENE00019762, WBGENE00009966	1392	4	11373	6.12769	1	1	0.994962

## Sheet: GOMF of  membrane protein
Category	Term	Count	%	PValue	Genes	List Total	Pop Hits	Pop Total	Fold Enrichment	Bonferroni	Benjamini	FDR
GOTERM_MF_DIRECT	GO:0005216~ion channel activity	8	8.42105	5.77141e-06	WBGENE00003839, WBGENE00006774, WBGENE00006797, WBGENE00000051, WBGENE00006809, WBGENE00020490, WBGENE00022815, WBGENE00001651	80	84	9479	11.2845	0.000663494	0.000663713	0.00061177
GOTERM_MF_DIRECT	GO:0005509~calcium ion binding	9	9.47368	0.000222781	WBGENE00003497, WBGENE00017576, WBGENE00000395, WBGENE00004374, WBGENE00000253, WBGENE00000401, WBGENE00021910, WBGENE00000402, WBGENE00004921	80	197	9479	5.41313	0.0252972	0.0100139	0.00923019
GOTERM_MF_DIRECT	GO:0055077~gap junction hemi-channel activity	4	4.21053	0.000288571	WBGENE00002133, WBGENE00002136, WBGENE00002129, WBGENE00002139	80	16	9479	29.6219	0.0326457	0.0100139	0.00923019
GOTERM_MF_DIRECT	GO:0005243~gap junction channel activity	4	4.21053	0.000348309	WBGENE00002133, WBGENE00002136, WBGENE00002129, WBGENE00002139	80	17	9479	27.8794	0.0392706	0.0100139	0.00923019
GOTERM_MF_DIRECT	GO:0004889~acetylcholine-activated cation-selective channel activity	5	5.26316	0.000769422	WBGENE00006774, WBGENE00013914, WBGENE00006797, WBGENE00000051, WBGENE00000062	80	50	9479	11.8488	0.084713	0.0159019	0.0146574
GOTERM_MF_DIRECT	GO:0042166~acetylcholine binding	5	5.26316	0.000829664	WBGENE00006774, WBGENE00013914, WBGENE00006797, WBGENE00000051, WBGENE00000062	80	51	9479	11.6164	0.091037	0.0159019	0.0146574
GOTERM_MF_DIRECT	GO:0005230~extracellular ligand-gated ion channel activity	6	6.31579	0.00171023	WBGENE00006774, WBGENE00013914, WBGENE00006797, WBGENE00000051, WBGENE00000062, WBGENE00001588	80	104	9479	6.83582	0.178682	0.0280967	0.0258978
GOTERM_MF_DIRECT	GO:0004713~protein tyrosine kinase activity	5	5.26316	0.00478013	WBGENE00004740, WBGENE00002991, WBGENE00004962, WBGENE00002299, WBGENE00020504	80	82	9479	7.22485	0.423646	0.0687143	0.0633367
GOTERM_MF_DIRECT	GO:0004871~signal transducer activity	6	6.31579	0.00633469	WBGENE00001803, WBGENE00015263, WBGENE00018798, WBGENE00016984, WBGENE00000302, WBGENE00010315	80	141	9479	5.04202	0.51848	0.0731219	0.0673993
GOTERM_MF_DIRECT	GO:0004714~transmembrane receptor protein tyrosine kinase activity	3	3.15789	0.00671242	WBGENE00004740, WBGENE00002299, WBGENE00020504	80	15	9479	23.6975	0.53908	0.0731219	0.0673993
GOTERM_MF_DIRECT	GO:0042277~peptide binding	3	3.15789	0.00763011	WBGENE00011803, WBGENE00018798, WBGENE00007071	80	16	9479	22.2164	0.58556	0.0731219	0.0673993
GOTERM_MF_DIRECT	GO:0008324~cation transmembrane transporter activity	3	3.15789	0.00763011	WBGENE00000393, WBGENE00001651, WBGENE00011821	80	16	9479	22.2164	0.58556	0.0731219	0.0673993
GOTERM_MF_DIRECT	GO:0005254~chloride channel activity	4	4.21053	0.0129621	WBGENE00009632, WBGENE00007203, WBGENE00007404, WBGENE00001588	80	59	9479	8.03305	0.776956	0.114665	0.105691
GOTERM_MF_DIRECT	GO:0004438~phosphatidylinositol-3-phosphatase activity	2	2.10526	0.0329276	WBGENE00003475, WBGENE00003478	80	4	9479	59.2437	0.978729	0.270476	0.249309
GOTERM_MF_DIRECT	GO:0004016~adenylate cyclase activity	3	3.15789	0.0359912	WBGENE00000070, WBGENE00000071, WBGENE00000068	80	36	9479	9.87396	0.985232	0.275932	0.254338
GOTERM_MF_DIRECT	GO:0016849~phosphorus-oxygen lyase activity	3	3.15789	0.0397369	WBGENE00000070, WBGENE00000071, WBGENE00000068	80	38	9479	9.35428	0.990562	0.285609	0.263257
GOTERM_MF_DIRECT	GO:0015464~acetylcholine receptor activity	3	3.15789	0.0560754	WBGENE00013914, WBGENE00000051, WBGENE00000062	80	46	9479	7.72745	0.998688	0.379334	0.349647
GOTERM_MF_DIRECT	GO:0016301~kinase activity	7	7.36842	0.0594815	WBGENE00006940, WBGENE00004740, WBGENE00007918, WBGENE00004962, WBGENE00002299, WBGENE00020504, WBGENE00000897	80	334	9479	2.48327	0.999135	0.380021	0.35028
GOTERM_MF_DIRECT	GO:0015385~sodium:proton antiporter activity	2	2.10526	0.072585	WBGENE00003730, WBGENE00003943	80	9	9479	26.3306	0.999828	0.43933	0.404948
GOTERM_MF_DIRECT	GO:0005546~phosphatidylinositol-4,5-bisphosphate binding	2	2.10526	0.0803216	WBGENE00003475, WBGENE00000565	80	10	9479	23.6975	0.999934	0.461849	0.425705
GOTERM_MF_DIRECT	GO:0004930~G-protein coupled receptor activity	6	6.31579	0.084863	WBGENE00001803, WBGENE00015263, WBGENE00018798, WBGENE00003006, WBGENE00016984, WBGENE00010315	80	281	9479	2.52998	0.999963	0.464726	0.428356
GOTERM_MF_DIRECT	GO:0015299~solute:proton antiporter activity	2	2.10526	0.0956042	WBGENE00003730, WBGENE00003943	80	12	9479	19.7479	0.99999	0.499749	0.460638

## Sheet: Mcconnell R E, et al. 2011
Refseq ID	Coverage	SID	GID	CID	Total spectra	Prep 1	Prep 2	Prep 3	Prep 4	Prep 5	Category	Gene Name/Description	Refseq peptide ID	Gene stable ID	NCBI gene ID	Gene name_y	anotated C.elegans ID	anotated C.elegans gene name
gi|6753374|ref|NP_033994.1|	0.04	1	587	484	10	2	3	3	1	1	adhesion	cadherin-1 [Mus musculus]	NP_033994	ENSMUSG00000000303	12550	Cdh1	WBGene00000395;WBGene00019994;WBGene00019994;WBGene00001980;WBGene00001475	fmi-1;hmr-1;cdh-4;cdh-1;cdh-3
gi|9790073|ref|NP_062727.1|	0.31	1	659	81	72	14	32	13	3	10	adhesion	cadherin-17 precursor [Mus musculus]	NP_062727	ENSMUSG00000028217	12557	Cdh17	WBGene00001475; WBGene00001980; WBGene00000396; WBGene00019994; WBGene00017576	fmi-1; hmr-1; cdh-4; cdh-1; cdh-8
gi|157951727|ref|NP_663785.2|	0.1	2	169	30	14	2	3	5	3	1	adhesion	catenin alpha-2 isoform 1 [Mus musculus]	NP_663785	ENSMUSG00000063063	12386	Ctnna2	nan	nan
gi|146219830|ref|NP_001078919.1|	0.35	1	123	57	73	9	29	11	5	19	adhesion	catenin delta-1 isoform 1 [Mus musculus]	NP_001078919	ENSMUSG00000034101	12388	Ctnnd1	WBGene00002175	jac-1
gi|85719301|ref|NP_001034275.1|	0.17	2	645	319	16	4	2	4	4	2	adhesion	CEACAM-1 [Mus musculus]	NP_001034275	ENSMUSG00000074272	26365	Ceacam1	nan	nan
gi|169808418|ref|NP_082115.2|	0.1	1	207	307	8	0	2	2	1	3	adhesion	CEACAM-20 [Mus musculus]	NP_082115	ENSMUSG00000070777	71601	Ceacam20	nan	nan
gi|11037800|ref|NP_067623.1|	0.2	1	18	292	14	4	5	3	0	2	adhesion	cell surface A33 antigen precursor [Mus musculus]	NP_067623	ENSMUSG00000000544	59290	Gpa33	nan	nan
gi|189458807|ref|NP_001032800.2|	0.09	1	227	224	13	0	3	2	1	7	adhesion	cingulin [Mus musculus]	NP_001032800	ENSMUSG00000068876	70737	Cgn	nan	nan
gi|6753438|ref|NP_034032.1|	0.09	1	589	497	5	0	2	1	2	0	adhesion	claudin-3 [Mus musculus]	NP_034032	ENSMUSG00000070473	12739	Cldn3	nan	nan
gi|302318906|ref|NP_001180548.1|	0.08	1	429	485	9	3	3	2	1	0	adhesion	claudin-7 [Mus musculus]	NP_001180548	ENSMUSG00000018569	53624	Cldn7	nan	nan
gi|112293275|ref|NP_032558.2|	0.34	1	26	190	62	8	22	13	7	12	adhesion	epithelial cell adhesion molecule [Mus musculus]	NP_032558	ENSMUSG00000045394	17075	Epcam	nan	nan
gi|6754576|ref|NP_034869.1|	0.14	1	596	226	44	7	11	15	8	3	adhesion	mucin-13 precursor [Mus musculus]	NP_034869	ENSMUSG00000022824	17063	Muc13	nan	nan
gi|21312502|ref|NP_082345.1|	0.3	1	255	98	75	16	18	15	11	15	adhesion	mucin-like protocadherin, cdhr5 isoform 2 [Mus musculus]	NP_082345	ENSMUSG00000025497	72040	Cdhr5	WBGene00000401	cdh-9
gi|282165827|ref|NP_001028536.2|	0.08	1	411	238	17	2	6	7	1	1	adhesion	protocadherin-24 [Mus musculus]	NP_001028536	ENSMUSG00000034918	268663	Cdhr2	WBGene00001475; WBGene00001980; WBGene00019994; WBGene00000396; WBGene00017576	fmi-1; hmr-1; cdh-1; cdh-4; cdh-8
gi|22122475|ref|NP_666122.1|	0.1	1	292	388	12	5	4	0	2	1	adhesion	tetraspanin 8 [Mus musculus]	NP_666122	ENSMUSG00000034127	216350	Tspan8	nan	nan
gi|254675277|ref|NP_033412.2|	0.05	1	370	349	8	1	3	2	1	1	adhesion	tight junction protein ZO-1 [Mus musculus]	NP_033412	ENSMUSG00000030516	21872	Tjp1	WBGene00013683	zoo-1
gi|312222765|ref|NP_001185914.1|	0.03	2	178	460	6	0	1	2	0	3	adhesion	tight junction protein ZO-2 [Mus musculus]	NP_001185914	ENSMUSG00000024812	21873	Tjp2	WBGene00013683	zoo-1
gi|114052811|ref|NP_038797.2|	0.06	1	33	311	7	0	0	0	3	4	adhesion	tight junction protein ZO-3 [Mus musculus]	NP_038797	ENSMUSG00000034917	27375	Tjp3	WBGene00013683	zoo-1
gi|40254290|ref|NP_780553.2|	0.22	1	502	90	57	7	20	15	8	7	channel/transporter	anoctamin-6 [Mus musculus]	NP_780553	ENSMUSG00000064210	105722	Ano6	nan	nan
gi|110347473|ref|NP_031494.2|	0.33	1	15	169	17	7	1	6	1	2	channel/transporter	apolipoprotein A-IV precursor [Mus musculus]	NP_031494	ENSMUSG00000032080	11808	Apoa4	nan	nan
gi|161702988|ref|NP_033823.2|	0.13	1	188	28	80	14	22	20	5	19	channel/transporter	apolipoprotein B precursor [Mus musculus]	NP_033823	ENSMUSG00000020609	238055	Apob	nan	nan
gi|6680710|ref|NP_031498.1|	0.13	1	567	433	16	3	6	4	2	1	channel/transporter	aquaporin-1 [Mus musculus]	NP_031498	ENSMUSG00000004655	11826	Aqp1	nan	nan
gi|110225379|ref|NP_031405.2|	0.01	1	14	2	6	1	1	3	1	0	channel/transporter	ATP-binding cassette sub-family A member 2 [Mus musculus]	NP_031405	ENSMUSG00000026944	11305	Abca2	WBGene00000023;WBGene00018982;WBGene00000019;WBGene00000020	abt-5;abt-6;abt-1;abt-2
gi|60218877|ref|NP_033017.2|	0.22	1	533	160	30	9	6	4	5	6	channel/transporter	ATP-binding cassette sub-family D member 3 [Mus musculus]	NP_033017	ENSMUSG00000028127	19299	Abcd3	WBGene00004059;WBGene00004058	pmp-2;pmp-1
gi|6752944|ref|NP_036050.1|	0.21	1	578	143	40	8	12	10	2	8	channel/transporter	ATP-binding cassette sub-family G member 2 [Mus musculus]	NP_036050	ENSMUSG00000029802	26357	Abcg2	WBGene00015479;WBGene00017179;WBGene00006522	wht-1;wht-4;abcx-1
gi|14141178|ref|NP_114090.1|	0.15	1	116	179	23	8	8	5	0	2	channel/transporter	ATP-binding cassette sub-family G member 5 [Mus musculus]	NP_114090	ENSMUSG00000040505	27409	Abcg5	WBGene00016973	abch-1
gi|17530789|ref|NP_080456.1|	0.15	1	211	239	17	5	2	5	3	2	channel/transporter	ATP-binding cassette sub-family G member 8 [Mus musculus]	NP_080456	ENSMUSG00000024254	67470	Abcg8	WBGene00015479;WBGene00017179;WBGene00006522	wht-1;wht-4;abcx-1
gi|85701714|ref|NP_001028371.1|	0.16	1	644	104	25	8	7	7	2	1	channel/transporter	calcium-activated chloride channel [Mus musculus]	NP_001028371	ENSMUSG00000074195	99709	Clca4b	nan	nan
gi|8567336|ref|NP_059502.1|	0.05	1	640	423	5	0	0	0	1	4	channel/transporter	calcium-activated chloride channel regulator 1 precursor [Mus musculus]	NP_059502	ENSMUSG00000028255	23844	Clca1	nan	nan
gi|110556625|ref|NP_997091.3|	0.14	1	19	104	26	8	7	7	3	1	channel/transporter	calcium-activated chloride channel regulator 4 [Mus musculus]	NP_997091	ENSMUSG00000068547	99663	Clca4a	nan	nan
gi|116063566|ref|NP_038834.2|	0.21	1	40	59	92	12	25	25	18	12	channel/transporter	canalicular multispecific organic anion transporter 1 [Mus musculus]	NP_038834	ENSMUSG00000025194	12780	Abcc2	WBGene00000477	cft-1
gi|27369886|ref|NP_766209.1|	0.69	1	403	141	68	3	20	19	16	10	channel/transporter	chloride intracellular channel protein 5 [Mus musculus]	NP_766209	ENSMUSG00000023959	224796	Clic5	WBGene00001371;WBGene00001365;WBGene00021817;WBGene00001791	exl-1;exc-4;Y53G8B.1;gst-43
gi|12963733|ref|NP_076046.1|	0.05	1	84	457	6	1	2	3	0	0	channel/transporter	choline transporter-like protein 4 [Mus musculus]	NP_076046	ENSMUSG00000007034	70129	Slc44a4	nan	nan
gi|124487348|ref|NP_001074553.1|	0.01	1	71	2	10	0	4	2	1	3	channel/transporter	cubilin precursor [Mus musculus]	NP_001074553	ENSMUSG00000026726	65969	Cubn	nan	nan
gi|227499249|ref|NP_034547.2|	0.06	1	324	360	7	0	2	2	0	3	channel/transporter	hephaestin isoform 1 [Mus musculus]	NP_034547	ENSMUSG00000031209	15203	Heph	nan	nan
gi|27734186|ref|NP_775564.1|	0.07	1	409	406	7	1	2	1	0	3	channel/transporter	large neutral amino acids transporter small subunit 4 [Mus musculus]	NP_775564	ENSMUSG00000038178	215113	Slc43a2	nan	nan
gi|120444906|ref|NP_573447.2|	0.14	1	57	17	7	1	6	0	0	0	channel/transporter	low affinity sodium-glucose cotransporter [Mus musculus]	NP_573447	ENSMUSG00000020229	64452	Slc5a4a	WBGene00014092;WBGene00000501	ZK822.5;cho-1
gi|254540023|ref|NP_001156929.1|	0.56	1	361	15	341	82	117	61	40	41	channel/transporter	microsomal triglyceride transfer protein large subunit isoform 1 [Mus musculus]	NP_001156929	ENSMUSG00000028158	17777	Mttp	WBGene00001099	dsc-4
gi|161086924|ref|NP_032856.2|	0.13	1	185	13	55	17	13	11	2	12	channel/transporter	multidrug resistance protein 2 [Mus musculus]	NP_032856	ENSMUSG00000042476	18670	Abcb4	WBGene00004008;WBGene00004006;WBGene00001818;WBGene00001817;WBGene00004003;WBGene00003995;WBGene00004000;WBGene00004001;WBGene00004002	pgp-14;pgp-12;haf-8;haf-7;pgp-9;pgp-1;pgp-6;pgp-7;pgp-8
gi|153791547|ref|NP_035206.2|	0.43	1	155	13	362	77	84	90	48	63	channel/transporter	multidrug resistance protein 3 [Mus musculus]	NP_035206	ENSMUSG00000040584	18671	Abcb1a	WBGene00003996;WBGene00003999;WBGene00004008;WBGene00004006;WBGene00001818;WBGene00001817;WBGene00004003;WBGene00003995;WBGene00004000;WBGene00004001;WBGene00004002	pgp-2;pgp-5;pgp-14;pgp-12;haf-8;haf-7;pgp-9;pgp-1;pgp-6;pgp-7;pgp-8
gi|6755566|ref|NP_036160.1|	0.46	1	605	89	75	4	27	19	14	11	channel/transporter	Na(+)/H(+) exchange regulatory cofactor NHE-RF1 [Mus musculus]	NP_036160	ENSMUSG00000020733	26941	Slc9a3r1	WBGene00006438	nrfl-1
gi|225579120|ref|NP_067492.2|	0.68	1	307	44	131	13	47	35	18	18	channel/transporter	Na(+)/H(+) exchange regulatory cofactor NHE-RF3 [Mus musculus]	NP_067492	ENSMUSG00000038298	59020	Pdzk1	WBGene00006438	nrfl-1
gi|253970442|ref|NP_997125.2|	0.21	1	359	54	190	27	50	50	32	31	channel/transporter	Niemann-Pick C1-like protein 1 precursor [Mus musculus]	NP_997125	ENSMUSG00000020447	237636	Npc1l1	WBGene00004231	ptr-17
gi|62234487|ref|NP_080758.1|	0.1	1	540	249	11	7	1	1	1	1	channel/transporter	plasma membrane calcium ATPase 1 [Mus musculus]	NP_080758	ENSMUSG00000019943	67972	Atp2b1	WBGene00004063;WBGene00015660;WBGene00015338;WBGene00012341;WBGene00019875;WBGene00003153	pmr-1;catp-3;catp-2;catp-6;mca-2;mca-3
gi|157168326|ref|NP_619593.2|	0.08	1	161	8	60	17	22	7	8	6	channel/transporter	potassium-transporting ATPase alpha chain 2 [Mus musculus]	NP_619593	ENSMUSG00000022229	192113	Atp12a	WBGene00004063;WBGene00015660;WBGene00015338;WBGene00012341;WBGene00019875;WBGene00003153	pmr-1;catp-3;catp-2;catp-6;mca-2;mca-3
gi|112293264|ref|NP_031978.2|	0.5	1	25	64	61	23	23	7	1	7	channel/transporter	protein disulfide-isomerase A3 precursor [Mus musculus]	NP_031978	ENSMUSG00000027248	14827	Pdia3	WBGene00003962;WBGene00014807;WBGene00003963	pdi-1;M04D5.1;pdi-2
gi|239985622|ref|NP_081016.2|	0.07	1	347	491	6	0	1	3	0	2	channel/transporter	proton-coupled folate transporter [Mus musculus]	NP_081016	ENSMUSG00000020829	52466	Slc46a1	WBGene00021159;WBGene00012811	Y4C6B.5;Y43F8A.5
gi|20982825|ref|NP_631881.1|	0.06	1	250	324	15	5	4	4	1	1	channel/transporter	sodium- and chloride-dependent transporter XTRP3A [Mus musculus]	NP_631881	ENSMUSG00000036814	102680	Slc6a20a	nan	nan
gi|110347555|ref|NP_663398.2|	0.06	1	17	359	7	2	0	4	0	1	channel/transporter	sodium-coupled monocarboxylate transporter 1 [Mus musculus]	NP_663398	ENSMUSG00000020062	216225	Slc5a8	WBGene00000501	cho-1
gi|294979183|ref|NP_001171095.1|	0.08	1	423	391	10	2	2	3	2	1	channel/transporter	sodium-coupled monocarboxylate transporter 2 [Mus musculus]	NP_001171095	ENSMUSG00000041644	241612	Slc5a12	WBGene00000501	cho-1
gi|58037367|ref|NP_083154.1|	0.14	1	530	189	67	13	18	18	9	9	channel/transporter	sodium-dependent neutral amino acid transporter B(0)AT1 [Mus musculus]	NP_083154	ENSMUSG00000021565	74338	Slc6a19	nan	nan
gi|66793411|ref|NP_035532.2|	0.15	1	555	220	14	0	2	7	3	2	channel/transporter	sodium-dependent phosphate transport protein 2B [Mus musculus]	NP_035532	ENSMUSG00000029188	20531	Slc34a2	WBGene00022767	ZK563.2
gi|261824023|ref|NP_062784.3|	0.29	1	394	17	321	61	79	75	49	57	channel/transporter	sodium/glucose cotransporter 1 [Mus musculus]	NP_062784	ENSMUSG00000011034	20537	Slc5a1	nan	nan
gi|124486700|ref|NP_001074529.1|	0.17	1	62	161	24	2	2	7	4	9	channel/transporter	sodium/hydrogen exchanger 3, NHE3 [Mus musculus]	NP_001074529	ENSMUSG00000036123	105243	Slc9a3	WBGene00003733;WBGene00003732;WBGene00003730;WBGene00003734	nhx-5;nhx-4;nhx-2;nhx-6
gi|22122753|ref|NP_666310.1|	0.1	1	293	231	23	7	8	7	0	1	channel/transporter	sodium/myo-inositol cotransporter 2 [Mus musculus]	NP_666310	ENSMUSG00000030769	233836	Slc5a11	nan	nan
gi|21450277|ref|NP_659149.1|	0.5	1	274	8	743	209	220	122	92	100	channel/transporter	sodium/potassium-transporting ATPase subunit alpha-1 precursor [Mus musculus]	NP_659149	ENSMUSG00000033161	11928	Atp1a1	WBGene00015660;WBGene00015338;WBGene00019875;WBGene00003153	catp-3;catp-2;mca-2;mca-3
gi|21450321|ref|NP_659170.1|	0.21	1	275	8	323	82	103	53	45	40	channel/transporter	sodium/potassium-transporting ATPase subunit alpha-3 [Mus musculus]	NP_659170				nan	nan
gi|226958351|ref|NP_038762.1|	0.12	1	318	8	185	27	67	31	31	29	channel/transporter	sodium/potassium-transporting ATPase subunit alpha-4 [Mus musculus]	NP_038762	ENSMUSG00000007107	27222	Atp1a4	WBGene00004063;WBGene00015660;WBGene00015338;WBGene00012341;WBGene00019875;WBGene00003153	pmr-1;catp-3;catp-2;catp-6;mca-2;mca-3
gi|6753138|ref|NP_033851.1|	0.3	1	583	173	81	14	36	15	8	8	channel/transporter	sodium/potassium-transporting ATPase subunit beta-1 [Mus musculus]	NP_033851	ENSMUSG00000026576	11931	Atp1b1	WBGene00008074	nkb-2
gi|11967935|ref|NP_071856.1|	0.12	1	55	296	10	0	3	4	1	2	channel/transporter	solute carrier family 13 member 2 [Mus musculus]	NP_071856	ENSMUSG00000001095	20500	Slc13a2	WBGene00003517;WBGene00003518;WBGene00003519;WBGene00007138	nac-1;nac-2;nac-3;B0285.6
gi|119392092|ref|NP_444309.2|	0.2	1	53	63	176	27	46	38	44	21	channel/transporter	solute carrier family 15 member 1 [Mus musculus]	NP_444309	ENSMUSG00000025557	56643	Slc15a1	nan	nan
gi|165377237|ref|NP_112474.2|	0.09	1	197	320	16	3	5	3	1	4	channel/transporter	solute carrier family 2, facilitated glucose transporter member 2 [Mus musculus]	NP_112474	ENSMUSG00000027690	20526	Slc2a2	WBGene00019207;WBGene00016431;WBGene00010684;WBGene00012536;WBGene00013074;WBGene00010811;WBGene00008730;WBGene00019550;WBGene00019549;WBGene00043980;WBGene00017382;WBGene00019548;WBGene00019547	fgt-1;C35A11.4;K08F9.1;Y37A1A.3;hmit-1.2;hmit-1.3;F13B12.2;K09C4.5;K09C4.4;F11D5.7;F11D5.5;K09C4.2;K09C4.1
gi|23943838|ref|NP_694790.1|	0.1	1	336	389	11	2	1	1	0	7	channel/transporter	solute carrier family 25, member 1 [Mus musculus]	NP_694790	ENSMUSG00000003528	13358	Slc25a1	nan	nan
gi|31981655|ref|NP_599252.2|	0.32	1	470	113	37	6	5	9	12	5	channel/transporter	solute carrier family 26, member 6 [Mus musculus]	NP_599252	ENSMUSG00000023259	171429	Slc26a6	nan	nan
gi|31981655|ref|NP_599252.2|	0.32	1	470	113	37	6	5	9	12	5	channel/transporter	solute carrier family 26, member 6 [Mus musculus]	NP_599252	ENSMUSG00000107138	171429	Slc26a6	nan	nan
gi|227908843|ref|NP_001004184.2|	0.06	1	325	448	7	0	3	1	1	2	channel/transporter	solute carrier family 28, member 1 [Mus musculus]	NP_001004184	ENSMUSG00000025726	434203	Slc28a1	WBGene00017868;WBGene00017867	slc-28.2;slc-28.1
gi|119120879|ref|NP_033231.2|	0.3	1	50	76	71	22	16	16	9	8	channel/transporter	solute carrier family 3, member 1 [Mus musculus]	NP_033231	ENSMUSG00000024131	20532	Slc3a1	nan	nan
gi|117676363|ref|NP_075708.2|	0.18	1	44	17	112	20	41	27	13	11	channel/transporter	solute carrier family 5 member 4b [Mus musculus]	NP_075708	ENSMUSG00000020226	64454	Slc5a4b	WBGene00014092;WBGene00000501	ZK822.5;cho-1
gi|157824093|ref|NP_780339.2|	0.09	1	166	276	10	3	4	1	1	1	channel/transporter	transient receptor potential cation channel subfamily M member 4 [Mus musculus]	NP_780339	ENSMUSG00000038260	68667	Trpm4	WBGene00020972;WBGene00004149;WBGene00021404;WBGene00021408;WBGene00000425;WBGene00001651	trpl-2;trpl-5;trpl-3;trpl-4;ced-11;gon-2
gi|6755963|ref|NP_035824.1|	0.41	1	608	134	31	21	2	3	0	5	channel/transporter	voltage-dependent anion-selective channel protein 1 [Mus musculus]	NP_035824	ENSMUSG00000020402	22333	Vdac1	WBGene00019900	vdac-1
gi|6755965|ref|NP_035825.1|	0.38	1	609	228	31	20	6	3	0	2	channel/transporter	voltage-dependent anion-selective channel protein 2 [Mus musculus]	NP_035825	ENSMUSG00000021771	22334	Vdac2	WBGene00019900	vdac-1
gi|312222784|ref|NP_001185927.1|	0.23	1	446	134	15	10	1	2	0	2	channel/transporter	voltage-dependent anion-selective channel protein 3 [Mus musculus]	NP_001185927	ENSMUSG00000008892	22335	Vdac3	WBGene00019900	vdac-1
gi|22122825|ref|NP_666355.1|	0.17	1	294	268	14	2	8	3	0	1	cytoskeleton	actin-related protein 2 [Mus musculus]	NP_666355	ENSMUSG00000020152	66713	Actr2	WBGene00000200	arx-2
gi|13386054|ref|NP_080828.1|	0.18	1	106	455	7	2	2	1	0	2	cytoskeleton	actin-related protein 2/3 complex subunit 4 isoform 1 [Mus musculus]	NP_080828	ENSMUSG00000079426	68089	Arpc4	WBGene00000204	arx-6
gi|23956222|ref|NP_076224.1|	0.36	1	343	182	22	10	8	3	1	0	cytoskeleton	actin-related protein 3 [Mus musculus]	NP_076224	ENSMUSG00000026341	74117	Actr3	WBGene00000199	arx-1
gi|6671507|ref|NP_031418.1|	0.67	1	541	6	1278	364	275	242	228	169	cytoskeleton	actin, aortic smooth muscle [Mus musculus]	NP_031418	ENSMUSG00000035783	11475	Acta2	nan	nan
gi|6671509|ref|NP_031419.1|	0.81	1	542	6	2512	549	442	429	731	361	cytoskeleton	actin, cytoplasmic 1 [Mus musculus]	NP_031419	ENSMUSG00000029580	11461	Actb	WBGene00000065;WBGene00000067;WBGene00000066;WBGene00000063;WBGene00000064	act-3;act-5;act-4;act-1;act-2
gi|157951604|ref|NP_031624.2|	0.21	1	167	306	8	0	1	3	1	3	cytoskeleton	adenylyl cyclase-associated protein 1 [Mus musculus]	NP_031624	ENSMUSG00000028656	12331	Cap1	WBGene00000294;WBGene00015975	cas-1;cas-2
gi|226246550|ref|NP_001139668.1|	0.37	1	311	93	39	10	16	9	2	2	cytoskeleton	adseverin isoform 1 [Mus musculus]	NP_001139668	ENSMUSG00000002565	20259	Scin	WBGene00010593	gsnl-1
gi|61097906|ref|NP_598917.1|	0.32	1	534	19	87	28	15	22	8	14	cytoskeleton	alpha-actinin-1 [Mus musculus]	NP_598917	ENSMUSG00000015143	109711	Actn1	nan	nan
gi|11230802|ref|NP_068695.1|	0.62	1	27	19	187	59	31	42	28	27	cytoskeleton	alpha-actinin-4 [Mus musculus]	NP_068695	ENSMUSG00000054808	60595	Actn4	nan	nan
gi|7305031|ref|NP_038841.1|	0.26	1	619	94	34	4	14	2	6	8	cytoskeleton	band 4.1-like protein 3 [Mus musculus]	NP_038841	ENSMUSG00000024044	13823	Epb41l3	WBGene00001333;WBGene00001488;WBGene00001489;WBGene00001491	erm-1;frm-1;frm-2;frm-4
gi|30425250|ref|NP_780706.1|	0.53	1	431	6	861	241	168	169	158	125	cytoskeleton	beta-actin-like protein 2 [Mus musculus]	NP_780706	ENSMUSG00000055194	238880	Actbl2	nan	nan
gi|6680832|ref|NP_031615.1|	0.48	1	571	256	23	8	6	4	3	2	cytoskeleton	calmodulin [Mus musculus]	NP_031615	ENSMUSG00000036438	12314	Calm2	WBGene00019352;WBGene00015264;WBGene00008453;WBGene00000285;WBGene00000287	K03A1.4;B0563.7;E02A10.3;cal-1;cal-3
gi|6753294|ref|NP_033948.1|	0.51	1	585	30	111	32	29	25	9	16	cytoskeleton	catenin alpha-1 [Mus musculus]	NP_033948	ENSMUSG00000037815	12385	Ctnna1	nan	nan
gi|260166642|ref|NP_001159374.1|	0.38	1	391	27	96	17	40	22	4	13	cytoskeleton	catenin beta-1 [Mus musculus]	NP_001159374	ENSMUSG00000006932	12387	Ctnnb1	nan	nan
gi|30520041|ref|NP_848784.1|	0.21	1	433	432	18	1	4	6	2	5	cytoskeleton	clarin-3 [Mus musculus]	NP_848784	ENSMUSG00000050866	212070	Clrn3	WBGene00235279	Y67D8C.22
gi|51491845|ref|NP_001003908.1|	0.37	1	521	26	146	19	21	27	31	48	cytoskeleton	clathrin heavy chain 1 [Mus musculus]	NP_001003908	ENSMUSG00000047126	67300	Cltc	WBGene00011867	chc-1
gi|162135966|ref|NP_766084.3|	0.08	1	190	197	19	1	2	5	0	11	cytoskeleton	cordon-bleu [Mus musculus]	NP_766084	ENSMUSG00000020173	12808	Cobl	nan	nan
gi|309262863|ref|XP_003085904.1|	0.26	4	248	109	202	28	48	46	44	36	cytoskeleton	cortactin [Mus musculus]	XP_003085904				nan	nan
gi|134288917|ref|NP_084514.2|	0.09	1	111	53	35	2	1	4	7	21	cytoskeleton	cytoplasmic dynein 1 heavy chain 1 [Mus musculus]	NP_084514	ENSMUSG00000018707	13424	Dync1h1	WBGene00000962	dhc-1
gi|33563250|ref|NP_034173.1|	0.27	1	481	3	48	4	17	12	7	8	cytoskeleton	desmin [Mus musculus]	NP_034173	ENSMUSG00000026208	13346	Des	nan	nan
gi|161016843|ref|NP_031909.2|	0.15	1	184	185	17	0	9	5	1	2	cytoskeleton	desmoglein-2 precursor [Mus musculus]	NP_031909	ENSMUSG00000044393	13511	Dsg2	nan	nan
gi|190194418|ref|NP_076331.2|	0.35	1	229	2	244	55	56	66	23	44	cytoskeleton	desmoplakin [Mus musculus]	NP_076331	ENSMUSG00000054889	109620	Dsp	nan	nan
gi|75677397|ref|NP_031971.2|	0.27	1	622	97	26	0	4	7	3	12	cytoskeleton	epidermal growth factor receptor kinase substrate 8 [Mus musculus]	NP_031971	ENSMUSG00000015766	13860	Eps8	nan	nan
gi|19527082|ref|NP_598628.1|	0.5	1	238	56	87	6	20	21	19	21	cytoskeleton	epidermal growth factor receptor kinase substrate 8-like protein 3 [Mus musculus]	NP_598628	ENSMUSG00000040600	99662	Eps8l3	WBGene00001330	eps-8
gi|37537522|ref|NP_659097.2|	0.05	1	497	2	53	2	8	17	10	16	cytoskeleton	epiplakin [Mus musculus]	NP_659097	ENSMUSG00000115388	223650	Eppk1	nan	nan
gi|83921618|ref|NP_033536.2|	0.73	1	635	1	453	45	92	105	112	99	cytoskeleton	ezrin [Mus musculus]	NP_033536	ENSMUSG00000052397	22350	Ezr	nan	nan
gi|161086971|ref|NP_033927.2|	0.12	1	186	327	7	2	1	2	1	1	cytoskeleton	F-actin-capping protein subunit alpha-1 [Mus musculus]	NP_033927	ENSMUSG00000070372	12340	Capza1	WBGene00000292	cap-1
gi|6671672|ref|NP_031630.1|	0.15	1	543	327	10	3	2	3	1	1	cytoskeleton	F-actin-capping protein subunit alpha-2 [Mus musculus]	NP_031630	ENSMUSG00000015733	12343	Capza2	WBGene00000292	cap-1
gi|6753262|ref|NP_033928.1|	0.38	1	584	199	15	4	1	5	2	3	cytoskeleton	F-actin-capping protein subunit beta isoform b [Mus musculus]	NP_033928	ENSMUSG00000028745	12345	Capzb	WBGene00000293	cap-2
gi|125347376|ref|NP_034357.2|	0.04	1	75	61	11	1	3	3	1	3	cytoskeleton	filamin-A [Mus musculus]	NP_034357	ENSMUSG00000031328	192176	Flna	nan	nan
gi|145966915|ref|NP_598841.1|	0.09	1	122	61	22	2	3	5	3	9	cytoskeleton	filamin-B [Mus musculus]	NP_598841	ENSMUSG00000025278	286940	Flnb	nan	nan
gi|254911003|ref|NP_076138.2|	0.25	2	373	163	22	0	10	6	3	3	cytoskeleton	harmonin [Mus musculus]	NP_076138	ENSMUSG00000030838	72088	Ush1c	nan	nan
gi|269914154|ref|NP_808385.2|	0.15	1	399	3	99	14	21	30	20	14	cytoskeleton	hypothetical protein LOC239673 [Mus musculus]	NP_808385	ENSMUSG00000048699	239673	Krt90	nan	nan
gi|21313234|ref|NP_080109.1|	0.13	1	262	363	7	1	0	3	1	2	cytoskeleton	IRTKS, brain-specific angiogenesis inhibitor 1-associated protein 2-like protein 1 [Mus musculus]	NP_080109	ENSMUSG00000038859	66898	Baiap2l1	nan	nan
gi|28395018|ref|NP_034723.1|	0.37	1	417	27	65	7	24	12	6	16	cytoskeleton	junction plakoglobin [Mus musculus]	NP_034723	ENSMUSG00000001552	16480	Jup	WBGene00001979	hmp-2
gi|145580629|ref|NP_997652.4|	0.03	1	118	3	58	10	12	23	5	8	cytoskeleton	keratin Kb40 [Mus musculus]	NP_997652	ENSMUSG00000050463	332131	Krt78	nan	nan
gi|291575137|ref|NP_001167570.1|	0.19	1	421	4	43	7	9	18	5	4	cytoskeleton	keratin, type I cuticular Ha6 [Mus musculus]	NP_001167570	ENSMUSG00000020916	16673	Krt36	nan	nan
gi|254540068|ref|NP_034794.2|	0.71	1	362	4	158	25	25	46	36	26	cytoskeleton	keratin, type I cytoskeletal 18 [Mus musculus]	NP_034794	ENSMUSG00000023043	16668	Krt18	nan	nan
gi|6680606|ref|NP_032497.1|	0.86	1	566	4	872	119	176	177	245	155	cytoskeleton	keratin, type I cytoskeletal 19 [Mus musculus]	NP_032497	ENSMUSG00000020911	16669	Krt19	nan	nan
gi|21592285|ref|NP_075745.1|	0.75	1	280	4	326	24	71	90	79	62	cytoskeleton	keratin, type I cytoskeletal 20 [Mus musculus]	NP_075745	ENSMUSG00000035775	66809	Krt20	nan	nan
gi|15431281|ref|NP_203537.1|	0.03	1	159	4	12	3	3	1	3	2	cytoskeleton	keratin, type I cytoskeletal 23 [Mus musculus]	NP_203537	ENSMUSG00000006777	94179	Krt23	nan	nan
gi|122425580|ref|NP_083669.1|	0.03	1	58	4	24	6	7	5	3	3	cytoskeleton	keratin, type I cytoskeletal 24 [Mus musculus]	NP_083669	ENSMUSG00000020913	75706	Krt24	nan	nan
gi|225903444|ref|NP_032500.2|	0.41	1	310	3	82	9	11	41	10	11	cytoskeleton	keratin, type II cuticular Hb4 [Mus musculus]	NP_032500	ENSMUSG00000044294	16680	Krt84	nan	nan
gi|31980832|ref|NP_058575.2|	0.08	1	461	3	6	0	1	2	3	0	cytoskeleton	keratin, type II cuticular Hb5 [Mus musculus]	NP_058575				nan	nan
gi|126116585|ref|NP_032499.2|	0.09	1	80	3	77	17	20	25	5	10	cytoskeleton	keratin, type II cytoskeletal 1 [Mus musculus]	NP_032499	ENSMUSG00000046834	16678	Krt1	nan	nan
gi|51092293|ref|NP_001003667.1|	0.07	1	519	3	125	15	35	34	18	23	cytoskeleton	keratin, type II cytoskeletal 1b [Mus musculus]	NP_001003667	ENSMUSG00000067594	406220	Krt77	nan	nan
gi|124487419|ref|NP_034798.2|	0.1	1	73	3	74	12	20	30	2	10	cytoskeleton	keratin, type II cytoskeletal 2 epidermal [Mus musculus]	NP_034798	ENSMUSG00000064201	16681	Krt2	nan	nan
gi|85701680|ref|NP_001028349.1|	0.1	1	643	3	70	11	15	24	8	12	cytoskeleton	keratin, type II cytoskeletal 2 oral [Mus musculus]	NP_001028349	ENSMUSG00000075402	77055	Krt76	nan	nan
gi|14861854|ref|NP_149064.1|	0.39	1	127	3	169	13	45	50	32	29	cytoskeleton	keratin, type II cytoskeletal 7 [Mus musculus]	NP_149064	ENSMUSG00000023039	110310	Krt7	nan	nan
gi|47523977|ref|NP_998893.1|	0.05	1	517	3	43	7	9	17	2	8	cytoskeleton	keratin, type II cytoskeletal 72 [Mus musculus]	NP_998893	ENSMUSG00000056605	105866	Krt72	nan	nan
gi|114145561|ref|NP_112447.2|	0.85	1	34	3	1450	147	343	345	363	252	cytoskeleton	keratin, type II cytoskeletal 8 [Mus musculus]	NP_112447	ENSMUSG00000049382	16691	Krt8	nan	nan
gi|165905585|ref|NP_001107017.1|	0.23	1	198	103	33	4	5	9	5	10	cytoskeleton	LIM domain and actin-binding protein 1 isoform a [Mus musculus]	NP_001107017	ENSMUSG00000023022	65970	Lima1	nan	nan
gi|157311641|ref|NP_963287.2|	0.16	1	163	74	39	0	5	6	7	21	cytoskeleton	LIM domain only 7 [Mus musculus]	NP_963287	ENSMUSG00000033060	380928	Lmo7	WBGene00017904	lim-8
gi|312433955|ref|NP_001186065.1|	0.01	1	447	2	5	0	2	0	3	0	cytoskeleton	microtubule-actin cross-linking factor 1 isoform 1 [Mus musculus]	NP_001186065	ENSMUSG00000028649	11426	Macf1	nan	nan
gi|18859641|ref|NP_542766.1|	0.01	1	226	1	9	1	3	4	1	0	cytoskeleton	myosin heavy chain, cardiac muscle beta [Mus musculus]	NP_542766	ENSMUSG00000053093	140781	Myh7	nan	nan
gi|153792649|ref|NP_001093105.1|	0.01	1	156	1	9	1	3	3	1	1	cytoskeleton	myosin heavy chain, fast skeletal muscle, embryonic [Mus musculus]	NP_001093105	ENSMUSG00000020908	17883	Myh3	nan	nan
gi|71143152|ref|NP_796343.2|	0.02	1	616	1	9	1	3	3	2	0	cytoskeleton	myosin heavy chain, skeletal muscle [Mus musculus]	NP_796343	ENSMUSG00000055775	17885	Myh8	nan	nan
gi|67189167|ref|NP_034985.2|	0.01	1	577	1	10	1	3	3	2	1	cytoskeleton	myosin heavy chain, skeletal muscle, fetal [Mus musculus]	NP_034985	ENSMUSG00000057003	17884	Myh4	nan	nan
gi|33620739|ref|NP_034990.1|	0.76	1	485	123	88	24	25	17	11	11	cytoskeleton	myosin light polypeptide 6 [Mus musculus]	NP_034990	ENSMUSG00000090841	17904	Myl6	WBGene00010554;WBGene00011734;WBGene00023451	mlc-6;mlc-5;mlc-7
gi|21728376|ref|NP_075891.1|	0.62	1	289	127	41	19	5	11	3	3	cytoskeleton	myosin regulatory light chain 12B [Mus musculus]	NP_075891	ENSMUSG00000034868	67938	Myl12b	WBGene00003369;WBGene00003370	mlc-1;mlc-2
gi|22094119|ref|NP_035716.1|	0.04	1	291	1	9	2	0	0	2	5	cytoskeleton	myosin-18a [Mus musculus]	NP_035716	ENSMUSG00000000631	360013	Myo18a	WBGene00012437	nmy-3
gi|124487037|ref|NP_001074688.1|	0.74	1	65	1	1582	315	352	354	323	238	cytoskeleton	myosin-1a [Mus musculus]	NP_001074688	ENSMUSG00000025401	432516	Myo1a	nan	nan
gi|124494244|ref|NP_001074243.1|	0.16	2	74	1	34	2	10	11	4	7	cytoskeleton	myosin-1c [Mus musculus]	NP_001074243	ENSMUSG00000017774	17913	Myo1c	nan	nan
gi|118026911|ref|NP_796364.2|	0.49	1	48	1	265	74	57	58	30	46	cytoskeleton	myosin-1d [Mus musculus]	NP_796364	ENSMUSG00000035441	338367	Myo1d	nan	nan
gi|68299824|ref|NP_851417.2|	0.07	2	444	223	12	4	6	1	0	1	cytoskeleton	myosin-1e [Mus musculus]	NP_851417	ENSMUSG00000032220	71602	Myo1e	WBGene00002035	hum-1
gi|46399202|ref|NP_963894.1|	0.23	1	510	1	58	12	16	18	1	11	cytoskeleton	myosin-5b [Mus musculus]	NP_963894	ENSMUSG00000025885	17919	Myo5b	nan	nan
gi|261823961|ref|NP_001034635.2|	0.45	1	392	5	179	36	46	47	11	39	cytoskeleton	myosin-6 [Mus musculus]	NP_001034635	ENSMUSG00000033577	17920	Myo6	WBGene00004969	spe-15
gi|115511010|ref|NP_032689.2|	0.02	1	38	5	6	2	0	1	2	1	cytoskeleton	myosin-7a [Mus musculus]	NP_032689	ENSMUSG00000030761	17921	Myo7a	nan	nan
gi|261823963|ref|NP_115770.2|	0.47	1	393	5	362	36	83	111	59	73	cytoskeleton	myosin-7b [Mus musculus]	NP_115770	ENSMUSG00000024388	17922	Myo7b	WBGene00002039	hum-6
gi|114326446|ref|NP_071855.2|	0.63	1	36	1	793	187	190	188	93	135	cytoskeleton	non-muscle myosin IIa [Mus musculus]	NP_071855	ENSMUSG00000022443	17886	Myh9	nan	nan
gi|33598964|ref|NP_780469.1|	0.15	1	484	1	202	37	54	48	26	37	cytoskeleton	non-muscle myosin IIb [Mus musculus]	NP_780469	ENSMUSG00000020900	77579	Myh10	nan	nan
gi|29336026|ref|NP_082297.1|	0.7	1	422	1	2468	492	583	546	462	385	cytoskeleton	non-muscle myosin IIc [Mus musculus]	NP_082297	ENSMUSG00000030739	71960	Myh14	nan	nan
gi|21312960|ref|NP_080439.1|	0.13	1	258	248	11	2	1	1	2	5	cytoskeleton	plakophilin-2 [Mus musculus]	NP_080439	ENSMUSG00000041957	67451	Pkp2	WBGene00002175	jac-1
gi|85986577|ref|NP_001028382.1|	0.7	1	647	16	529	99	134	111	118	67	cytoskeleton	plastin-1 [Mus musculus]	NP_001028382	ENSMUSG00000049493	102502	Pls1	WBGene00022425;WBGene00022223	plst-1;Y73B3B.1
gi|31543113|ref|NP_032905.2|	0.05	1	451	16	24	2	13	6	1	2	cytoskeleton	plastin-2 [Mus musculus]	NP_032905	ENSMUSG00000021998	18826	Lcp1	WBGene00022425;WBGene00022223	plst-1;Y73B3B.1
gi|254675265|ref|NP_958796.2|	0.6	1	368	2	986	131	189	305	153	208	cytoskeleton	plectin [Mus musculus]	NP_958796	ENSMUSG00000022565	18810	Plec	nan	nan
gi|309264133|ref|XP_003086230.1|	0.12	2	186	327	7	2	1	2	1	1	cytoskeleton	PREDICTED: f-actin-capping protein subunit alpha-1-like [Mus musculus]	XP_003086230				nan	nan
gi|309267203|ref|XP_003086989.1|	0.07	2	118	3	58	10	12	23	5	8	cytoskeleton	PREDICTED: keratin, type II cytoskeletal 78-like, partial [Mus musculus]	XP_003086989				nan	nan
gi|94363353|ref|XP_484859.3|	0.73	1	652	123	83	23	23	16	11	10	cytoskeleton	PREDICTED: myosin light polypeptide 6-like [Mus musculus]	XP_484859				nan	nan
gi|309272591|ref|XP_003085561.1|	0.18	1	445	162	23	0	4	7	5	7	cytoskeleton	PREDICTED: myosin-15-like [Mus musculus]	XP_003085561				nan	nan
gi|6755040|ref|NP_035202.1|	0.31	1	600	447	7	0	0	3	2	2	cytoskeleton	profilin-1 [Mus musculus]	NP_035202	ENSMUSG00000018293	18643	Pfn1	nan	nan
gi|157277948|ref|NP_033067.2|	0.17	1	162	1	140	14	31	33	30	32	cytoskeleton	radixin [Mus musculus]	NP_033067	ENSMUSG00000032050	19684	Rdx	nan	nan
gi|225543191|ref|NP_742120.2|	0.01	1	305	1	23	5	6	5	5	2	cytoskeleton	rootletin [Mus musculus]	NP_742120	ENSMUSG00000040860	230872	Crocc	nan	nan
gi|241982716|ref|NP_038635.2|	0.59	1	349	1	569	103	207	119	47	93	cytoskeleton	smooth muscle myosin heavy chain [Mus musculus]	NP_038635	ENSMUSG00000018830	17880	Myh11	nan	nan
gi|295054266|ref|NP_001171138.1|	0.47	1	426	7	226	20	62	54	28	62	cytoskeleton	spectrin alpha chain, brain isoform 2 [Mus musculus]	NP_001171138	ENSMUSG00000057738	20740	Sptan1	nan	nan
gi|117938332|ref|NP_787030.2|	0.38	1	45	10	173	30	49	40	21	33	cytoskeleton	spectrin beta chain, brain 1 isoform 1 [Mus musculus]	NP_787030	ENSMUSG00000020315	20742	Sptbn1	nan	nan
gi|117938334|ref|NP_033286.2|	0.42	1	46	10	172	31	48	39	19	35	cytoskeleton	spectrin beta chain, brain 1 isoform 2 [Mus musculus]	NP_033286	ENSMUSG00000020315	20742	Sptbn1	nan	nan
gi|55926127|ref|NP_067262.1|	0.03	1	525	10	6	2	0	3	0	1	cytoskeleton	spectrin beta chain, brain 2 [Mus musculus]	NP_067262	ENSMUSG00000067889	20743	Sptbn2	nan	nan
gi|227116327|ref|NP_035732.2|	0.03	1	322	371	5	0	1	0	1	3	cytoskeleton	talin-1 [Mus musculus]	NP_035732	ENSMUSG00000028465	21894	Tln1	WBGene00006771	tln-1
gi|190014629|ref|NP_780495.2|	0.07	1	228	387	12	1	2	4	2	3	cytoskeleton	taperin [Mus musculus]	NP_780495	ENSMUSG00000048707	97031	Tprn	nan	nan
gi|31542143|ref|NP_058082.2|	0.4	1	449	147	27	3	8	4	7	5	cytoskeleton	transforming protein RhoA precursor [Mus musculus]	NP_058082	ENSMUSG00000007815	11848	Rhoa	nan	nan
gi|40254525|ref|NP_071709.2|	0.13	1	503	364	7	3	1	0	0	3	cytoskeleton	tropomyosin alpha-3 chain [Mus musculus]	NP_071709	ENSMUSG00000027940	59069	Tpm3	WBGene00002978	lev-11
gi|224809300|ref|NP_001029051.2|	0.1	1	300	72	7	3	0	2	0	2	cytoskeleton	tubulin alpha chain-like 3 [Mus musculus]	NP_001029051	ENSMUSG00000021216	238463	Tubal3	WBGene00006537;WBGene00006536;WBGene00006539;WBGene00000248;WBGene00006532;WBGene00006530;WBGene00012489;WBGene00006529;WBGene00006528	tbb-2;tbb-1;tbb-6;ben-1;tba-6;tba-4;Y19D2B.1;tba-2;tba-1
gi|6678469|ref|NP_033474.1|	0.41	1	551	72	69	30	7	12	5	15	cytoskeleton	tubulin alpha-1C chain [Mus musculus]	NP_033474	ENSMUSG00000043091	22146	Tuba1c	WBGene00006537;WBGene00006536;WBGene00006539;WBGene00000248	tbb-2;tbb-1;tbb-6;ben-1
gi|6678467|ref|NP_033473.1|	0.33	1	550	72	38	11	4	10	1	12	cytoskeleton	tubulin alpha-4A chain [Mus musculus]	NP_033473	ENSMUSG00000026202	22145	Tuba4a	WBGene00006537;WBGene00006536;WBGene00006539;WBGene00000248	tbb-2;tbb-1;tbb-6;ben-1
gi|22165384|ref|NP_666228.1|	0.58	1	296	38	69	33	3	17	9	7	cytoskeleton	tubulin beta-2C chain [Mus musculus]	NP_666228	ENSMUSG00000036752	227613	Tubb4b	WBGene00006538	tbb-4
gi|7106439|ref|NP_035785.1|	0.55	1	615	38	67	34	3	12	11	7	cytoskeleton	tubulin beta-5 chain [Mus musculus]	NP_035785	ENSMUSG00000001525	22154	Tubb5	WBGene00006537;WBGene00006536;WBGene00006539;WBGene00000248;WBGene00006530;WBGene00012489;WBGene00006529;WBGene00006528	tbb-2;tbb-1;tbb-6;ben-1;tba-4;Y19D2B.1;tba-2;tba-1
gi|124430500|ref|NP_001074440.1|	0.09	1	61	38	13	6	2	4	0	1	cytoskeleton	tubulin, beta 1 [Mus musculus]	NP_001074440	ENSMUSG00000016255	545486	Tubb1	WBGene00006537;WBGene00006536;WBGene00006539;WBGene00000248;WBGene00006532	tbb-2;tbb-1;tbb-6;ben-1;tba-6
gi|51092301|ref|NP_001003670.1|	0.05	1	520	3	27	4	6	11	2	4	cytoskeleton	type II keratin Kb14 [Mus musculus]	NP_001003670	ENSMUSG00000064232	406223	Gm5414	nan	nan
gi|190684696|ref|NP_033535.2|	0.68	1	230	11	658	161	211	128	85	73	cytoskeleton	villin-1 [Mus musculus]	NP_033535	ENSMUSG00000026175	22349	Vil1	WBGene00010593	gsnl-1
gi|31982755|ref|NP_035831.2|	0.26	1	478	3	49	5	15	15	7	7	cytoskeleton	vimentin [Mus musculus]	NP_035831	ENSMUSG00000026728	22352	Vim	nan	nan
gi|34328108|ref|NP_031768.2|	0.02	1	490	393	10	0	2	5	1	2	ECM	collagen alpha-1(I) chain precursor [Mus musculus]	NP_031768	ENSMUSG00000001506	12842	Col1a1	nan	nan
gi|161484654|ref|NP_034061.2|	0.05	1	187	68	15	0	1	6	1	7	ECM	collagen alpha-1(IV) chain precursor [Mus musculus]	NP_034061	ENSMUSG00000031502	12826	Col4a1	nan	nan
gi|6753484|ref|NP_034063.1|	0.16	1	590	144	37	0	6	19	4	8	ECM	collagen alpha-1(VI) chain precursor [Mus musculus]	NP_034063	ENSMUSG00000001119	12833	Col6a1	nan	nan
gi|111120329|ref|NP_031769.2|	0.03	1	23	386	12	0	4	8	0	0	ECM	collagen alpha-2(I) chain precursor [Mus musculus]	NP_031769	ENSMUSG00000029661	12843	Col1a2	nan	nan
gi|226437587|ref|NP_034062.3|	0.08	1	312	208	24	0	7	12	0	5	ECM	collagen alpha-2(IV) chain preproprotein [Mus musculus]	NP_034062	ENSMUSG00000031503	12827	Col4a2	nan	nan
gi|22203747|ref|NP_666119.1|	0.16	1	298	136	31	0	5	16	4	6	ECM	collagen alpha-2(VI) chain precursor [Mus musculus]	NP_666119	ENSMUSG00000020241	12834	Col6a2	nan	nan
gi|242247116|ref|NP_081039.2|	0.08	1	350	137	28	0	3	17	2	6	ECM	collagen alpha-4(VI) chain precursor [Mus musculus]	NP_081039	ENSMUSG00000032572	68553	Col6a4	nan	nan
gi|253683445|ref|NP_001156627.1|	0.02	1	357	68	12	0	0	2	2	8	ECM	collagen, type IV, alpha 5 [Mus musculus]	NP_001156627	ENSMUSG00000031274	12830	Col4a5	nan	nan
gi|46849812|ref|NP_034363.1|	0.02	1	515	421	6	0	2	3	0	1	ECM	fibronectin precursor [Mus musculus]	NP_034363	ENSMUSG00000026193	14268	Fn1	WBGene00002915	let-805
gi|171543883|ref|NP_035047.2|	0.06	1	210	356	7	0	1	2	0	4	ECM	nidogen-1 precursor [Mus musculus]	NP_035047	ENSMUSG00000005397	18073	Nid1	nan	nan
gi|84370361|ref|NP_032721.2|	0.06	1	638	329	11	0	2	4	0	5	ECM	nidogen-2 precursor [Mus musculus]	NP_032721	ENSMUSG00000021806	18074	Nid2	nan	nan
gi|309264110|ref|XP_003086224.1|	0.21	3	438	32	86	0	13	55	5	13	ECM	PREDICTED: collagen alpha-3(VI) chain [Mus musculus]	XP_003086224				nan	nan
gi|309271626|ref|XP_003085374.1|	0.19	6	438	32	86	0	13	55	5	13	ECM	PREDICTED: LOW QUALITY PROTEIN: collagen alpha-3(VI) chain [Mus musculus]	XP_003085374				nan	nan
gi|224994260|ref|NP_035159.3|	0.17	1	303	334	292	144	43	33	23	49	ER	40S ribosomal protein [Mus musculus]	NP_035159	ENSMUSG00000032518	16785	Rpsa	WBGene00004469	rps-0
gi|6671569|ref|NP_031501.1|	0.33	2	442	235	18	15	2	0	0	1	ER	60S acidic ribosomal protein P0 [Mus musculus]	NP_031501	ENSMUSG00000067274	11837	Rplp0	WBGene00004408	rla-0
gi|14149647|ref|NP_035422.1|	0.42	1	117	358	385	154	56	57	37	81	ER	60S ribosomal protein [Mus musculus]	NP_035422	ENSMUSG00000047215	20005	Rpl9	WBGene00004420	rpl-9
gi|254540166|ref|NP_071705.3|	0.45	1	363	20	117	42	37	15	9	14	ER	78 kDa glucose-regulated protein precursor [Mus musculus]	NP_071705	ENSMUSG00000026864	14828	Hspa5	WBGene00002007;WBGene00002008	hsp-3;hsp-4
gi|119372300|ref|NP_062691.3|	0.06	1	52	467	5	0	1	2	0	2	ER	atlastin-2 [Mus musculus]	NP_062691	ENSMUSG00000059811	56298	Atl2	nan	nan
gi|31981310|ref|NP_036190.2|	0.22	1	466	259	20	1	7	4	2	6	ER	B-cell receptor-associated protein 31 [Mus musculus]	NP_036190	ENSMUSG00000002015	27061	Bcap31	WBGene00021883	Y54G2A.18
gi|113931150|ref|NP_081639.1|	0.53	1	32	207	26	7	8	6	2	3	ER	calcineurin B homologous protein 2 [Mus musculus]	NP_081639	ENSMUSG00000030865	70261	Chp2	WBGene00009260;WBGene00014109;WBGene00019108	calm-1;chpf-1;chpf-2
gi|160333212|ref|NP_001103969.1|	0.41	1	175	80	72	18	21	13	10	10	ER	calnexin precursor [Mus musculus]	NP_001103969	ENSMUSG00000020368	12330	Canx	WBGene00000567	cnx-1
gi|6680836|ref|NP_031617.1|	0.5	1	572	119	25	4	17	2	1	1	ER	calreticulin precursor [Mus musculus]	NP_031617	ENSMUSG00000003814	12317	Calr	WBGene00000802	crt-1
gi|247494234|ref|NP_001156498.1|	0.03	1	354	347	8	1	1	3	0	3	ER	DnaJ (Hsp40) homolog, subfamily C, member 13 [Mus musculus]	NP_001156498	ENSMUSG00000032560	235567	Dnajc13	WBGene00004378	rme-8
gi|126032329|ref|NP_034236.2|	0.43	1	79	88	75	17	5	24	11	18	ER	elongation factor 1-alpha 1 [Mus musculus]	NP_034236	ENSMUSG00000037742	13627	Eef1a1	WBGene00021466;WBGene00007001	eif-2gamma;tufm-2
gi|33859482|ref|NP_031933.1|	0.18	1	486	187	13	2	0	6	1	4	ER	elongation factor 2 [Mus musculus]	NP_031933	ENSMUSG00000034994	13629	Eef2	WBGene00001167	eef-2
gi|13507656|ref|NP_109636.1|	0.05	1	114	450	7	0	2	2	0	3	ER	endoplasmic reticulum aminopeptidase 1 [Mus musculus]	NP_109636	ENSMUSG00000021583	80898	Erap1	WBGene00011000;WBGene00010999;WBGene00011587;WBGene00012776;WBGene00009865	R03G8.6;R03G8.4;anp-1;Y42A5A.1;F49B2.6
gi|6755863|ref|NP_035761.1|	0.4	1	607	23	102	26	26	27	7	16	ER	endoplasmin [Mus musculus]	NP_035761	ENSMUSG00000020048	22027	Hsp90b1	WBGene00011480	enpl-1
gi|21450625|ref|NP_659207.1|	0.25	1	277	85	20	9	0	3	0	8	ER	eukaryotic initiation factor 4A-I [Mus musculus]	NP_659207	ENSMUSG00000059796	13681	Eif4a1	WBGene00002083	inf-1
gi|176865892|ref|NP_038534.2|	0.17	1	213	85	13	8	0	1	0	4	ER	eukaryotic initiation factor 4A-II [Mus musculus]	NP_038534	ENSMUSG00000022884	13682	Eif4a2	nan	nan
gi|20149756|ref|NP_619610.1|	0.23	1	246	85	14	10	0	1	0	3	ER	eukaryotic initiation factor 4A-III [Mus musculus]	NP_619610	ENSMUSG00000025580	192170	Eif4a3	WBGene00018007;WBGene00022029	F33D11.10;Y65B4A.6
gi|146219837|ref|NP_034253.3|	0.03	1	124	419	6	1	0	2	1	2	ER	eukaryotic translation initiation factor 3 subunit A [Mus musculus]	NP_034253	ENSMUSG00000024991	13669	Eif3a	WBGene00001209	egl-45
gi|6679465|ref|NP_032951.1|	0.06	1	559	463	6	1	3	0	0	2	ER	glucosidase 2 subunit beta precursor [Mus musculus]	NP_032951	ENSMUSG00000003402	19089	Prkcsh	WBGene00014249	ZK1307.8
gi|31981690|ref|NP_112442.2|	0.43	1	471	20	80	22	13	16	16	13	ER	heat shock cognate 71 kDa protein [Mus musculus]	NP_112442	ENSMUSG00000015656	15481	Hspa8	WBGene00016250;WBGene00009691;WBGene00009692;WBGene00002026	hsp-110;F44E5.4;F44E5.5;hsp-70
gi|6754254|ref|NP_034610.1|	0.2	1	594	23	44	13	2	14	3	12	ER	heat shock protein HSP 90-alpha [Mus musculus]	NP_034610	ENSMUSG00000021270	15519	Hsp90aa1	WBGene00000915	hsp-90
gi|40556608|ref|NP_032328.2|	0.27	1	504	23	51	19	2	14	5	11	ER	heat shock protein HSP 90-beta [Mus musculus]	NP_032328	ENSMUSG00000023944	15516	Hsp90ab1	WBGene00000915	hsp-90
gi|157951706|ref|NP_067370.3|	0.11	1	168	221	14	2	1	2	1	8	ER	hypoxia up-regulated protein 1 precursor [Mus musculus]	NP_067370	ENSMUSG00000032115	12282	Hyou1	WBGene00011771	T14G8.3
gi|295789166|ref|NP_001171472.1|	0.24	2	377	437	11	8	0	1	1	1	ER	predicted gene 6654 [Mus musculus]	NP_001171472				nan	nan
gi|309266388|ref|XP_003086751.1|	0.37	2	105	263	16	5	2	3	1	5	ER	PREDICTED: 40S ribosomal protein S13-like [Mus musculus]	XP_003086751				nan	nan
gi|149264635|ref|XP_001473856.1|	0.39	1	146	211	20	8	4	3	1	4	ER	PREDICTED: 40S ribosomal protein S18-like [Mus musculus]	XP_001473856				nan	nan
gi|309262784|ref|XP_003085887.1|	0.35	2	82	351	7	5	1	0	0	1	ER	PREDICTED: 40S ribosomal protein S19-like [Mus musculus]	XP_003085887				nan	nan
gi|309266362|ref|XP_003086745.1|	0.34	2	215	213	19	11	5	2	0	1	ER	PREDICTED: 40S ribosomal protein S2-like [Mus musculus]	XP_003086745				nan	nan
gi|309266179|ref|XP_003086717.1|	0.24	3	85	441	8	2	1	0	2	3	ER	PREDICTED: 40S ribosomal protein S23-like [Mus musculus]	XP_003086717				nan	nan
gi|149267855|ref|XP_001000635.2|	0.2	1	149	472	5	2	0	0	1	2	ER	PREDICTED: 40S ribosomal protein S24-like [Mus musculus]	XP_001000635				nan	nan
gi|20846986|ref|XP_144599.1|	0.21	1	249	452	7	5	1	1	0	0	ER	PREDICTED: 40S ribosomal protein S25-like [Mus musculus]	XP_144599				nan	nan
gi|149264508|ref|XP_001474465.1|	0.34	1	145	495	5	2	0	1	2	0	ER	PREDICTED: 40S ribosomal protein S29-like [Mus musculus]	XP_001474465				nan	nan
gi|149265827|ref|XP_001480995.1|	0.2	1	147	302	9	6	1	1	0	1	ER	PREDICTED: 40S ribosomal protein S3a-like [Mus musculus]	XP_001480995				nan	nan
gi|309265983|ref|XP_003086649.1|	0.48	2	138	237	17	12	2	2	0	1	ER	PREDICTED: 40S ribosomal protein S8-like, partial [Mus musculus]	XP_003086649				nan	nan
gi|309264022|ref|XP_003086186.1|	0.17	2	303	334	10	10	0	0	0	0	ER	PREDICTED: 40S ribosomal protein SA-like [Mus musculus]	XP_003086186				nan	nan
gi|309266351|ref|XP_003086742.1|	0.33	1	442	235	18	15	2	0	0	1	ER	PREDICTED: 60S acidic ribosomal protein P0-like [Mus musculus]	XP_003086742				nan	nan
gi|149259021|ref|XP_001477595.1|	0.21	1	140	304	9	3	0	3	0	3	ER	PREDICTED: 60S ribosomal protein L10-like [Mus musculus]	XP_001477595				nan	nan
gi|149251993|ref|XP_001475458.1|	0.21	2	100	326	12	9	2	1	0	0	ER	PREDICTED: 60S ribosomal protein L11 [Mus musculus]	XP_001475458				nan	nan
gi|309266497|ref|XP_003086778.1|	0.21	1	443	326	6	4	2	0	0	0	ER	PREDICTED: 60S ribosomal protein L11-like [Mus musculus]	XP_003086778				nan	nan
gi|94390243|ref|XP_001003212.1|	0.45	2	176	303	9	4	2	2	0	1	ER	PREDICTED: 60S ribosomal protein L12-like [Mus musculus]	XP_001003212				nan	nan
gi|149251177|ref|XP_001474740.1|	0.35	1	135	214	19	10	3	2	2	2	ER	PREDICTED: 60S ribosomal protein L13-like [Mus musculus]	XP_001474740				nan	nan
gi|149262861|ref|XP_001480343.1|	0.23	2	95	378	5	1	0	3	0	1	ER	PREDICTED: 60S ribosomal protein L15-like [Mus musculus]	XP_001480343				nan	nan
gi|149257513|ref|XP_001478961.1|	0.16	1	137	337	10	2	0	0	4	4	ER	PREDICTED: 60S ribosomal protein L17-like [Mus musculus]	XP_001478961				nan	nan
gi|149249111|ref|XP_001476570.1|	0.28	1	133	318	17	5	1	2	3	6	ER	PREDICTED: 60S ribosomal protein L21-like [Mus musculus]	XP_001476570				nan	nan
gi|149260643|ref|XP_001473265.1|	0.24	1	141	348	8	4	1	2	0	1	ER	PREDICTED: 60S ribosomal protein L23a-like [Mus musculus]	XP_001473265				nan	nan
gi|149262383|ref|XP_001473243.1|	0.36	1	142	404	8	5	1	1	0	1	ER	PREDICTED: 60S ribosomal protein L27 [Mus musculus]	XP_001473243				nan	nan
gi|309264589|ref|XP_003086295.1|	0.24	1	440	477	5	2	0	0	2	1	ER	PREDICTED: 60S ribosomal protein L27a [Mus musculus]	XP_003086295				nan	nan
gi|149234297|ref|XP_001479218.1|	0.26	1	132	478	5	2	0	2	1	0	ER	PREDICTED: 60S ribosomal protein L31-like [Mus musculus]	XP_001479218				nan	nan
gi|94385943|ref|XP_001004069.1|	0.31	5	177	373	5	2	1	1	0	1	ER	PREDICTED: 60S ribosomal protein L36-like [Mus musculus]	XP_001004069				nan	nan
gi|309265379|ref|XP_003086524.1|	0.29	2	338	247	11	5	1	0	0	5	ER	PREDICTED: 60S ribosomal protein L5-like [Mus musculus]	XP_003086524				nan	nan
gi|82880886|ref|XP_890389.1|	0.31	1	629	204	34	8	13	7	4	2	ER	PREDICTED: 60S ribosomal protein L6-like [Mus musculus]	XP_890389				nan	nan
gi|82950040|ref|XP_914375.1|	0.17	1	631	255	14	8	1	2	2	1	ER	PREDICTED: 60S ribosomal protein L7a-like [Mus musculus]	XP_914375				nan	nan
gi|309264139|ref|XP_003086220.1|	0.42	2	117	358	7	3	0	1	1	2	ER	PREDICTED: 60S ribosomal protein L9-like [Mus musculus]	XP_003086220				nan	nan
gi|309261892|ref|XP_003085430.1|	0.15	2	212	500	5	0	0	3	0	2	ER	PREDICTED: hemoglobin subunit beta-1-like [Mus musculus]	XP_003085430				nan	nan
gi|309262617|ref|XP_003085845.1|	0.28	1	437	236	16	3	5	4	1	3	ER	PREDICTED: protein disulfide-isomerase A6-like [Mus musculus]	XP_003085845				nan	nan
gi|6679299|ref|NP_032857.1|	0.46	1	554	191	40	25	1	5	5	4	ER	prohibitin [Mus musculus]	NP_032857	ENSMUSG00000038845	18673	Phb	WBGene00004014	phb-1
gi|86198316|ref|NP_033917.2|	0.12	1	648	278	10	3	1	0	1	5	ER	protein disulfide-isomerase A4 [Mus musculus]	NP_033917	ENSMUSG00000025823	12304	Pdia4	WBGene00003962;WBGene00014807	pdi-1;M04D5.1
gi|58037267|ref|NP_082235.1|	0.3	1	529	236	16	3	5	4	0	4	ER	protein disulfide-isomerase A6 [Mus musculus]	NP_082235	ENSMUSG00000020571	71853	Pdia6	WBGene00015168	pdi-6
gi|21312570|ref|NP_081676.1|	0.14	1	256	412	7	0	2	2	0	3	ER	protein ERGIC-53 precursor [Mus musculus]	NP_081676	ENSMUSG00000041891	70361	Lman1	WBGene00002071	ile-2
gi|67906177|ref|NP_033173.2|	0.07	1	611	342	9	1	3	2	0	3	ER	protein transport protein Sec23A [Mus musculus]	NP_033173	ENSMUSG00000020986	20334	Sec23a	WBGene00004754	sec-23
gi|244791271|ref|NP_081245.1|	0.08	1	353	271	12	1	0	2	3	6	ER	protein transport protein Sec31A [Mus musculus]	NP_081245	ENSMUSG00000035325	69162	Sec31a	WBGene00011338	sec-31
gi|8394252|ref|NP_058602.1|	0.11	1	637	431	5	3	1	0	0	1	ER	protein transport protein Sec61 subunit alpha isoform 1 [Mus musculus]	NP_058602	ENSMUSG00000030082	53421	Sec61a1	nan	nan
gi|54607016|ref|NP_001003934.1|	0.02	3	200	442	8	3	2	1	1	1	ER	reticulon-3 isoform 1 [Mus musculus]	NP_001003934	ENSMUSG00000024758	20168	Rtn3	nan	nan
gi|34610235|ref|NP_918943.1|	0.06	1	494	411	7	0	1	4	0	2	ER	reticulon-4 isoform A [Mus musculus]	NP_918943	ENSMUSG00000020458	68585	Rtn4	nan	nan
gi|36031132|ref|NP_031530.2|	0.12	1	496	58	16	6	4	3	3	0	ER	sarcoplasmic/endoplasmic reticulum calcium ATPase 1 [Mus musculus]	NP_031530	ENSMUSG00000030730	11937	Atp2a1	WBGene00004063;WBGene00015660;WBGene00015338;WBGene00019875;WBGene00003153	pmr-1;catp-3;catp-2;mca-2;mca-3
gi|158635979|ref|NP_001103610.1|	0.26	1	172	58	49	18	16	7	6	2	ER	sarcoplasmic/endoplasmic reticulum calcium ATPase 2 isoform a [Mus musculus]	NP_001103610	ENSMUSG00000029467	11938	Atp2a2	WBGene00004063;WBGene00015660;WBGene00015338;WBGene00012341;WBGene00019875;WBGene00003153	pmr-1;catp-3;catp-2;catp-6;mca-2;mca-3
gi|254039658|ref|NP_001156808.1|	0.06	1	360	58	6	3	0	0	1	2	ER	sarcoplasmic/endoplasmic reticulum calcium ATPase 3 isoform a [Mus musculus]	NP_001156808	ENSMUSG00000020788	53313	Atp2a3	WBGene00004736	sca-1
gi|46560565|ref|NP_081411.2|	0.06	1	512	428	5	0	0	0	1	4	ER	SEC24 related gene family, member D [Mus musculus]	NP_081411	ENSMUSG00000039234	69608	Sec24d	WBGene00004755	sec-24.1
gi|15147224|ref|NP_081600.1|	0.43	1	152	170	17	7	3	1	2	4	ER	sideroflexin-1 [Mus musculus]	NP_081600	ENSMUSG00000021474	14057	Sfxn1	WBGene00007080;WBGene00009513;WBGene00011440;WBGene00012402;WBGene00008137	sfxn-1.1;sfxn-1.2;sfxn-1.5;sfxn-1.3;sfxn-1.4
gi|110625624|ref|NP_038714.2|	0.12	1	20	376	5	1	0	2	0	2	ER	T-complex protein 1 subunit alpha [Mus musculus]	NP_038714	ENSMUSG00000068039	21454	Tcp1	WBGene00000377	cct-1
gi|225543319|ref|NP_033529.3|	0.14	1	306	186	17	2	3	5	1	6	ER	transitional endoplasmic reticulum ATPase [Mus musculus]	NP_033529	ENSMUSG00000028452	269523	Vcp	WBGene00008053;WBGene00007352	cdc-48.2;cdc-48.1
gi|165377206|ref|NP_080241.3|	0.12	1	196	464	6	4	0	0	0	2	ER	translocon-associated protein subunit alpha precursor [Mus musculus]	NP_080241	ENSMUSG00000021427	107513	Ssr1	WBGene00022122	trap-1
gi|262050625|ref|NP_001159952.1|	0.31	1	395	333	10	5	0	2	1	2	ER	translocon-associated protein subunit delta [Mus musculus]	NP_001159952	ENSMUSG00000002014	20832	Ssr4	WBGene00013238	trap-4
gi|21312968|ref|NP_080431.1|	0.08	1	259	492	6	5	0	1	0	0	ER	translocon-associated protein subunit gamma [Mus musculus]	NP_080431	ENSMUSG00000027828	67437	Ssr3	WBGene00021420	trap-3
gi|13195690|ref|NP_077239.1|	0.3	1	87	379	44	11	11	9	5	8	ER	ubiquitin-40S ribosomal protein S27a [Mus musculus]	NP_077239	ENSMUSG00000020460	78294	Rps27a	WBGene00010654;WBGene00009378;WBGene00006725	K08C9.7;F34H10.1;ubl-1
gi|255069795|ref|NP_035820.3|	0.05	1	379	473	5	0	0	1	1	3	ER	valyl-tRNA synthetase [Mus musculus]	NP_035820	ENSMUSG00000007029	22321	Vars	WBGene00006936	glp-4
gi|225637487|ref|NP_032512.2|	0.57	1	308	9	1346	229	255	257	357	248	hydrolase	aminopeptidase N [Mus musculus]	NP_032512	ENSMUSG00000039062	16790	Anpep	WBGene00011000;WBGene00010999;WBGene00011587;WBGene00012776;WBGene00009865	R03G8.6;R03G8.4;anp-1;Y42A5A.1;F49B2.6
gi|194473667|ref|NP_001123985.1|	0.58	1	233	21	288	51	72	71	57	37	hydrolase	angiotensin-converting enzyme 2 precursor [Mus musculus]	NP_001123985	ENSMUSG00000015405	70008	Ace2	WBGene00000039	acn-1
gi|46559389|ref|NP_997507.1|	0.4	1	511	29	210	32	57	54	35	32	hydrolase	angiotensin-converting enzyme isoform 1 [Mus musculus]	NP_997507	ENSMUSG00000020681	11421	Ace	nan	nan
gi|161016833|ref|NP_031902.2|	0.56	1	183	66	94	15	23	22	22	12	hydrolase	dipeptidase 1 precursor [Mus musculus]	NP_031902	ENSMUSG00000019278	13479	Dpep1	nan	nan
gi|6753674|ref|NP_034204.1|	0.45	2	320	37	236	50	48	56	43	39	hydrolase	dipeptidyl peptidase 4 [Mus musculus]	NP_034204	ENSMUSG00000035000	13482	Dpp4	WBGene00001054	dpf-1
gi|71892414|ref|NP_001025462.1|	0.27	1	618	159	32	5	9	7	6	5	hydrolase	ectonucleotide pyrophosphatase/phosphodiesterase family member 7 [Mus musculus]	NP_001025462	ENSMUSG00000046697	238011	Enpp7	WBGene00007755;WBGene00007753	C27A7.3;C27A7.1
gi|6679995|ref|NP_032142.1|	0.2	1	564	157	36	16	9	6	1	4	hydrolase	gamma-glutamyltranspeptidase 1 [Mus musculus]	NP_032142	ENSMUSG00000006345	14598	Ggt1	nan	nan
gi|6679653|ref|NP_031960.1|	0.46	1	562	14	510	106	118	114	89	83	hydrolase	glutamyl aminopeptidase [Mus musculus]	NP_031960	ENSMUSG00000028024	13809	Enpep	WBGene00011000;WBGene00010999	R03G8.6;R03G8.4
gi|124487323|ref|NP_001074551.1|	0.56	1	70	18	321	68	67	84	61	41	hydrolase	intestinal alkaline phosphatase [Mus musculus]	NP_001074551	ENSMUSG00000079440	76768	Alpi	nan	nan
gi|110347479|ref|NP_031458.2|	0.4	1	16	18	108	34	15	31	16	12	hydrolase	intestinal alkaline phosphatase precursor [Mus musculus]	NP_031458	ENSMUSG00000036500	11648	Akp3	nan	nan
gi|124487297|ref|NP_001074547.1|	0.29	1	69	12	570	110	131	126	111	92	hydrolase	lactase-phlorizin hydrolase preproprotein [Mus musculus]	NP_001074547	ENSMUSG00000026354	226413	Lct	WBGene00017103;WBGene00016848	klo-2;klo-1
gi|283483997|ref|NP_001164474.1|	0.5	1	415	2	1220	296	279	262	178	205	hydrolase	maltase-glucoamylase [Mus musculus]	NP_001164474	ENSMUSG00000068587	232714	Mgam	WBGene00018682;WBGene00019895	aagr-4;aagr-2
gi|6753066|ref|NP_033805.1|	0.11	1	581	314	6	0	1	4	0	1	hydrolase	membrane primary amine oxidase [Mus musculus]	NP_033805	ENSMUSG00000019326	11754	Aoc3	nan	nan
gi|31982199|ref|NP_032611.2|	0.1	1	474	212	20	4	2	5	4	5	hydrolase	meprin A subunit alpha [Mus musculus]	NP_032611	ENSMUSG00000023914	17287	Mep1a	nan	nan
gi|147901863|ref|NP_032612.2|	0.33	1	125	62	189	57	36	44	26	26	hydrolase	meprin A subunit beta precursor [Mus musculus]	NP_032612	ENSMUSG00000024313	17288	Mep1b	nan	nan
gi|57222282|ref|NP_001009546.1|	0.5	1	526	48	313	45	85	72	65	46	hydrolase	N-acetylated-alpha-linked acidic dipeptidase-like protein [Mus musculus]	NP_001009546	ENSMUSG00000054999	381204	Naaladl1	WBGene00020082;WBGene00007954;WBGene00044121	gcp-2.1;gcp-2.2;gcp-2.3
gi|31543255|ref|NP_032630.2|	0.53	1	452	24	379	62	74	100	84	59	hydrolase	neprilysin [Mus musculus]	NP_032630	ENSMUSG00000027820	17380	Mme	WBGene00018227;WBGene00016896;WBGene00017553;WBGene00017552;WBGene00017555;WBGene00013785;WBGene00017550;WBGene00016778;WBGene00018196;WBGene00017554;WBGene00020293;WBGene00013786;WBGene00013926	nep-15;nep-4;nep-8;nep-7;nep-10;nep-23;nep-6;nep-3;nep-13;nep-9;nep-20;nep-24;nep-1
gi|6679891|ref|NP_032086.1|	0.2	1	563	115	31	3	9	8	0	11	hydrolase	neutral alpha-glucosidase AB [Mus musculus]	NP_032086	ENSMUSG00000071650	14376	Ganab	WBGene00019895	aagr-2
gi|9055168|ref|NP_061300.1|	0.37	1	651	75	149	39	34	32	28	16	hydrolase	neutral ceramidase [Mus musculus]	NP_061300	ENSMUSG00000024887	54447	Asah2	nan	nan
gi|13507622|ref|NP_109617.1|	0.25	1	113	154	18	2	7	2	2	5	hydrolase	phosphatidylinositide phosphatase SAC1 [Mus musculus]	NP_109617	ENSMUSG00000025240	83493	Sacm1l	WBGene00009264	sac-1
gi|270341357|ref|NP_001161976.1|	0.09	1	400	415	6	0	0	2	1	3	hydrolase	phospholipase A2, group IVC [Mus musculus]	NP_001161976	ENSMUSG00000033847	232889	Pla2g4c	nan	nan
gi|124487227|ref|NP_001074876.1|	0.25	1	67	52	71	14	26	20	2	9	hydrolase	phospholipase B1, membrane-associated isoform 1 [Mus musculus]	NP_001074876	ENSMUSG00000029134	665270	Plb1	WBGene00022040;WBGene00011092;WBGene00008621;WBGene00012201;WBGene00022256;WBGene00011093	Y65B4BR.1;R07B7.8;F09C8.1;W02B12.1;Y73B6BL.37;R07B7.9
gi|255708458|ref|NP_001157528.1|	0.16	1	382	167	18	2	5	5	3	3	hydrolase	phospholipase D1 [Mus musculus]	NP_001157528	ENSMUSG00000027695	18805	Pld1	WBGene00004040	pld-1
gi|31543694|ref|NP_033189.2|	0.23	1	453	149	22	4	11	5	1	1	hydrolase	sphingosine-1-phosphate lyase 1 [Mus musculus]	NP_033189	ENSMUSG00000020097	20397	Sgpl1	WBGene00006418;WBGene00022427	spl-2;spl-3
gi|124487275|ref|NP_001074606.1|	0.54	1	68	2	1398	330	291	262	278	237	hydrolase	sucrase-isomaltase, intestinal [Mus musculus]	NP_001074606	ENSMUSG00000027790	69983	Sis	WBGene00018682;WBGene00019895	aagr-4;aagr-2
gi|10946884|ref|NP_067456.1|	0.42	1	12	65	123	32	40	27	17	7	hydrolase	trehalase precursor [Mus musculus]	NP_067456	ENSMUSG00000032098	58866	Treh	WBGene00006611;WBGene00006608;WBGene00006607;WBGene00006609	tre-5;tre-2;tre-1;tre-3
gi|133778994|ref|NP_573476.2|	0.29	1	90	95	52	15	14	14	7	2	hydrolase	X-prolyl aminopeptidase (aminopeptidase P) 2, membrane-bound isoform 1 [Mus musculus]	NP_573476	ENSMUSG00000037005	170745	Xpnpep2	WBGene00000155;WBGene00021555	app-1;Y45G5AM.2
gi|166064044|ref|NP_031804.3|	0.03	1	199	1	8	0	2	4	1	1	immunological	macrophage colony-stimulating factor 1 isoform 1 precursor [Mus musculus]	NP_031804	ENSMUSG00000014599	12977	Csf1	nan	nan
gi|6679457|ref|NP_032946.1|	0.11	1	558	481	14	0	5	5	1	3	immunological	bone marrow proteoglycan precursor [Mus musculus]	NP_032946	ENSMUSG00000027073	19074	Prg2	nan	nan
gi|133922588|ref|NP_001001892.2|	0.19	1	108	181	13	2	4	2	2	3	immunological	H-2 class I histocompatibility antigen, K-W28 alpha chain isoform 1 [Mus musculus]	NP_001001892	ENSMUSG00000061232	14972	H2-K1	nan	nan
gi|133778955|ref|NP_034510.3|	0.13	1	89	181	7	1	5	1	0	0	immunological	H-2 class I histocompatibility antigen, L-D alpha chain precursor [Mus musculus]	NP_034510	ENSMUSG00000073411	14964	H2-D1	nan	nan
gi|294997253|ref|NP_032225.2|	0.11	1	425	181	6	0	3	0	0	3	immunological	histocompatibility 2, blastocyst [Mus musculus]	NP_032225	ENSMUSG00000073406	14963	H2-Bl	nan	nan
gi|294997230|ref|NP_996988.2|	0.26	1	424	416	6	0	1	2	0	3	immunological	histocompatibility 2, class II antigen A, beta 1 precursor [Mus musculus]	NP_996988	ENSMUSG00000073421	14961	H2-Ab1	nan	nan
gi|309263668|ref|XP_003086105.1|	0.11	6	150	181	7	2	1	2	0	2	immunological	PREDICTED: h-2 class I histocompatibility antigen, K-W28 alpha chain-like [Mus musculus]	XP_003086105				nan	nan
gi|31982122|ref|NP_032900.2|	0.13	1	472	171	16	0	5	1	3	7	membrane	1-phosphatidylinositol-4,5-bisphosphate phosphodiesterase beta-3 [Mus musculus]	NP_032900	ENSMUSG00000024960	18797	Plcb3	nan	nan
gi|238637277|ref|NP_001154885.1|	0.3	1	334	128	32	7	16	9	0	0	membrane	4F2 cell-surface antigen heavy chain [Mus musculus]	NP_001154885	ENSMUSG00000010095	17254	Slc3a2	nan	nan
gi|23956196|ref|NP_081487.1|	0.63	1	342	70	80	26	28	19	3	4	membrane	annexin A13 [Mus musculus]	NP_081487				nan	nan
gi|6996913|ref|NP_031611.1|	0.57	1	612	79	104	56	18	17	9	4	membrane	annexin A2 [Mus musculus]	NP_031611	ENSMUSG00000032231	12306	Anxa2	nan	nan
gi|183979966|ref|NP_032331.2|	0.05	1	220	116	30	0	3	20	2	5	membrane	basement membrane-specific heparan sulfate proteoglycan core protein [Mus musculus]	NP_032331	ENSMUSG00000028763	15530	Hspg2	nan	nan
gi|34915988|ref|NP_033898.1|	0.17	2	39	343	8	2	3	0	1	2	membrane	basigin [Mus musculus]	NP_033898	ENSMUSG00000023175	12215	Bsg	WBGene00021305	zig-11
gi|6680854|ref|NP_031642.1|	0.29	1	573	403	8	2	3	2	0	1	membrane	caveolin-1 [Mus musculus]	NP_031642	ENSMUSG00000007655	12389	Cav1	WBGene00000301;WBGene00000302	cav-1;cav-2
gi|168823441|ref|NP_001028431.2|	0.21	1	206	331	10	2	1	1	5	1	membrane	coiled-coil domain-containing protein 109A [Mus musculus]	NP_001028431	ENSMUSG00000009647	215999	Mcu	WBGene00019296	mcu-1
gi|125628650|ref|NP_080285.2|	0.17	1	77	283	8	0	0	1	1	6	membrane	coiled-coil domain-containing protein 47 precursor [Mus musculus]	NP_080285	ENSMUSG00000078622	67163	Ccdc47	WBGene00014204	ccdc-47
gi|7710018|ref|NP_038543.1|	0.19	1	624	291	14	5	2	4	0	3	membrane	erythrocyte band 7 integral membrane protein [Mus musculus]	NP_038543	ENSMUSG00000026880	13830	Stom	WBGene00006065;WBGene00006063;WBGene00006741;WBGene00006064;WBGene00006067;WBGene00006068;WBGene00006066;WBGene00003166	sto-3;sto-1;unc-1;sto-2;sto-5;sto-6;sto-4;mec-2
gi|46849705|ref|NP_034836.1|	0.35	1	514	69	56	4	10	12	13	17	membrane	galectin-4 [Mus musculus]	NP_034836	ENSMUSG00000053964	16855	Lgals4	WBGene00002269;WBGene00004165;WBGene00018255;WBGene00002264;WBGene00002266;WBGene00002271;WBGene00002270	lec-6;pqn-84;F40H6.5;lec-1;lec-3;lec-8;lec-7
gi|6754534|ref|NP_034837.1|	0.35	1	595	69	38	9	8	7	8	6	membrane	galectin-6 [Mus musculus]	NP_034837				nan	nan
gi|226531119|ref|NP_034838.2|	0.15	1	316	341	9	2	2	1	1	3	membrane	galectin-9 [Mus musculus]	NP_034838	ENSMUSG00000001123	16859	Lgals9	WBGene00002269;WBGene00004165;WBGene00018255;WBGene00002264;WBGene00002266;WBGene00002271;WBGene00002270	lec-6;pqn-84;F40H6.5;lec-1;lec-3;lec-8;lec-7
gi|21699058|ref|NP_660112.1|	0.1	1	281	322	16	2	5	5	0	4	membrane	lysophospholipid acyltransferase 5 [Mus musculus]	NP_660112	ENSMUSG00000004270	14792	Lpcat3	WBGene00020115	mboa-6
gi|188497650|ref|NP_780612.2|	0.2	1	224	362	7	4	0	2	0	1	membrane	malectin precursor [Mus musculus]	NP_780612	ENSMUSG00000048578	109154	Mlec	WBGene00018423	F44E2.10
gi|31981068|ref|NP_064330.2|	0.26	1	464	392	10	1	3	4	0	2	membrane	microsomal glutathione S-transferase 1 [Mus musculus]	NP_064330	ENSMUSG00000008540	56615	Mgst1	nan	nan
gi|13385010|ref|NP_079845.1|	0.33	1	94	267	14	6	5	2	0	1	membrane	microsomal glutathione S-transferase 3 [Mus musculus]	NP_079845	ENSMUSG00000026688	66447	Mgst3	nan	nan
gi|194328695|ref|NP_035766.2|	0.11	1	231	444	8	2	2	2	1	1	membrane	phospholipid scramblase 1 [Mus musculus]	NP_035766	ENSMUSG00000032369	22038	Plscr1	WBGene00019531;WBGene00019530;WBGene00009753;WBGene00013052	scrm-5;scrm-8;scrm-6;scrm-7
gi|227116343|ref|NP_031669.3|	0.11	1	323	436	11	5	1	5	0	0	membrane	platelet glycoprotein 4 [Mus musculus]	NP_031669	ENSMUSG00000002944	12491	Cd36	WBGene00013039;WBGene00013578;WBGene00015389	scav-3;scav-2;scav-1
gi|80861460|ref|NP_001001488.2|	0.1	1	627	222	14	1	5	5	2	1	membrane	probable phospholipid-transporting ATPase IC [Mus musculus]	NP_001001488	ENSMUSG00000039529	54670	Atp8b1	WBGene00019166	tat-2
gi|251823824|ref|NP_082166.3|	0.1	1	355	260	19	3	4	9	0	3	membrane	sushi domain-containing protein 2 isoform 1 [Mus musculus]	NP_082166	ENSMUSG00000006342	71733	Susd2	WBGene00010540	K03H1.5
gi|70778974|ref|NP_001020484.1|	0.09	2	548	479	5	1	0	2	2	0	membrane	tapasin [Mus musculus]	NP_001020484	ENSMUSG00000024308	21356	Tapbp	nan	nan
gi|188528894|ref|NP_542123.3|	0.08	1	225	330	11	1	1	4	0	5	membrane	transmembrane 9 superfamily member 2 precursor [Mus musculus]	NP_542123	ENSMUSG00000025544	68059	Tm9sf2	nan	nan
gi|153791321|ref|NP_001093387.1|	0.4	1	154	132	106	3	41	29	14	19	membrane	transmembrane protein C19orf77 homolog precursor [Mus musculus]	NP_001093387	ENSMUSG00000078439	72273	Smim24	nan	nan
gi|6756041|ref|NP_035870.1|	0.18	1	610	424	5	0	0	1	4	0	metabolism	14-3-3 protein zeta/delta [Mus musculus]	NP_035870	ENSMUSG00000022285	22631	Ywhaz	WBGene00001502;WBGene00003920	ftt-2;par-5
gi|254553342|ref|NP_001156958.1|	0.26	1	364	82	12	3	2	4	0	3	metabolism	17-beta-hydroxysteroid dehydrogenase 13 isoform 1 [Mus musculus]	NP_001156958	ENSMUSG00000034528	243168	Hsd17b13	nan	nan
gi|28974982|ref|NP_803231.1|	0.41	1	419	142	47	11	10	10	4	12	metabolism	2-acylglycerol O-acyltransferase 2 [Mus musculus]	NP_803231	ENSMUSG00000052396	233549	Mogat2	WBGene00020910;WBGene00019464;WBGene00021818;WBGene00010296	dgtr-1;K07B1.4;Y53G8B.2;dgat-2
gi|171184435|ref|NP_067320.2|	0.09	1	209	488	7	1	0	4	0	2	metabolism	3-hydroxyacyl-CoA dehydratase 3 [Mus musculus]	NP_067320	ENSMUSG00000033629	57874	Hacd3	WBGene00011205	R10E4.9
gi|61888838|ref|NP_058043.3|	0.17	1	539	465	6	0	5	1	0	0	metabolism	3-hydroxyacyl-CoA dehydrogenase type-2 [Mus musculus]	NP_058043	ENSMUSG00000025260	15108	Hsd17b10	WBGene00000181	ard-1
gi|18700004|ref|NP_570934.1|	0.29	1	221	209	23	6	12	2	0	3	metabolism	3-ketoacyl-CoA thiolase A, peroxisomal precursor [Mus musculus]	NP_570934	ENSMUSG00000036138	113868	Acaa1a	nan	nan
gi|19527360|ref|NP_598891.1|	0.2	1	242	323	15	2	7	2	3	1	metabolism	abhydrolase domain-containing protein 3 [Mus musculus]	NP_598891	ENSMUSG00000002475	106861	Abhd3	WBGene00013358;WBGene00016644	abhd-3.1;abhd-3.2
gi|30424591|ref|NP_776112.1|	0.22	1	430	180	22	5	7	7	1	2	metabolism	acetolactate synthase-like protein [Mus musculus]	NP_776112	ENSMUSG00000032763	216136	Ilvbl	WBGene00020831	T26C12.1
gi|198386326|ref|NP_001128301.1|	0.12	1	244	396	9	2	1	2	2	2	metabolism	acyl-CoA:lysophosphatidylglycerol acyltransferase 1 [Mus musculus]	NP_001128301	ENSMUSG00000026623	226856	Lpgat1	WBGene00019465	acl-14
gi|52627143|ref|NP_080435.3|	0.24	1	522	178	23	6	5	6	1	5	metabolism	all-trans-retinol 13,14-reductase precursor [Mus musculus]	NP_080435	ENSMUSG00000056666	67442	Retsat	nan	nan
gi|6753010|ref|NP_035913.1|	0.17	1	579	474	5	2	3	0	0	0	metabolism	anterior gradient protein 2 homolog precursor [Mus musculus]	NP_035913	ENSMUSG00000020581	23795	Agr2	WBGene00018656;WBGene00013263	txdc-12.2;txdc-12.1
gi|6755004|ref|NP_036149.1|	0.12	1	599	350	7	0	3	2	0	2	metabolism	apoptosis-inducing factor 1, mitochondrial precursor [Mus musculus]	NP_036149	ENSMUSG00000036932	26926	Aifm1	WBGene00006937	wah-1
gi|61098088|ref|NP_035994.2|	0.21	1	535	153	19	0	0	5	2	12	metabolism	bifunctional 3'-phosphoadenosine 5'-phosphosulfate synthase 2 [Mus musculus]	NP_035994	ENSMUSG00000024899	23972	Papss2	WBGene00004091	pps-1
gi|21704206|ref|NP_663578.1|	0.34	1	288	33	74	12	27	12	13	10	metabolism	carboxylesterase 2 precursor [Mus musculus]	NP_663578	ENSMUSG00000061825	234671	Ces2c	WBGene00006412;WBGene00007695;WBGene00007692;WBGene00007691;WBGene00007693;WBGene00008451;WBGene00001578;WBGene00016862;WBGene00015071;WBGene00015067;WBGene00016863;WBGene00018958;WBGene00020688;WBGene00016595;WBGene00015284;WBGene00015279;WBGene00000037;WBGene00000038;WBGene00013875;WBGene00013874;WBGene00013873;WBGene00011364;WBGene00011362	nlg-1;C23H4.7;C23H4.3;C23H4.2;C23H4.4;E01G6.3;ges-1;C52A10.1;B0238.7;B0238.1;C52A10.2;F56C11.6;T22D1.11;C42D4.2;C01B10.10;C01B10.4;ace-3;ace-4;ZC376.3;ZC376.2;ZC376.1;T02B5.3;cest-1
gi|268839831|ref|NP_932116.2|	0.1	1	397	33	28	3	13	7	2	3	metabolism	carboxylesterase 2-like [Mus musculus]	NP_932116	ENSMUSG00000031877	72361	Ces2g	WBGene00006412;WBGene00007695;WBGene00007692;WBGene00007691;WBGene00007693;WBGene00008451;WBGene00001578;WBGene00016862;WBGene00015071;WBGene00015067;WBGene00016863;WBGene00018958;WBGene00020688;WBGene00016595;WBGene00015284;WBGene00015279;WBGene00000037;WBGene00000038;WBGene00013875;WBGene00013874;WBGene00013873;WBGene00011364;WBGene00011362	nlg-1;C23H4.7;C23H4.3;C23H4.2;C23H4.4;E01G6.3;ges-1;C52A10.1;B0238.7;B0238.1;C52A10.2;F56C11.6;T22D1.11;C42D4.2;C01B10.10;C01B10.4;ace-3;ace-4;ZC376.3;ZC376.2;ZC376.1;T02B5.3;cest-1
gi|254939648|ref|NP_001157228.1|	0.35	1	375	33	94	13	34	17	11	19	metabolism	carboxylesterase 5 [Mus musculus]	NP_001157228	ENSMUSG00000031886	234673	Ces2e	WBGene00006412;WBGene00007695;WBGene00007692;WBGene00007691;WBGene00007693;WBGene00008451;WBGene00001578;WBGene00016862;WBGene00015071;WBGene00015067;WBGene00016863;WBGene00018958;WBGene00020688;WBGene00016595;WBGene00015284;WBGene00015279;WBGene00000037;WBGene00000038;WBGene00013875;WBGene00013874;WBGene00013873;WBGene00011364;WBGene00011362	nlg-1;C23H4.7;C23H4.3;C23H4.2;C23H4.4;E01G6.3;ges-1;C52A10.1;B0238.7;B0238.1;C52A10.2;F56C11.6;T22D1.11;C42D4.2;C01B10.10;C01B10.4;ace-3;ace-4;ZC376.3;ZC376.2;ZC376.1;T02B5.3;cest-1
gi|19527178|ref|NP_598721.1|	0.31	1	239	33	59	8	24	10	6	11	metabolism	carboxylesterase 6 isoform 1 [Mus musculus]	NP_598721	ENSMUSG00000055730	102022	Ces2a	WBGene00006412;WBGene00007695;WBGene00007692;WBGene00007691;WBGene00007693;WBGene00008451;WBGene00001578;WBGene00016862;WBGene00015071;WBGene00015067;WBGene00016863;WBGene00018958;WBGene00020688;WBGene00016595;WBGene00015284;WBGene00015279;WBGene00000037;WBGene00000038;WBGene00013875;WBGene00013874;WBGene00013873;WBGene00011364;WBGene00011362	nlg-1;C23H4.7;C23H4.3;C23H4.2;C23H4.4;E01G6.3;ges-1;C52A10.1;B0238.7;B0238.1;C52A10.2;F56C11.6;T22D1.11;C42D4.2;C01B10.10;C01B10.4;ace-3;ace-4;ZC376.3;ZC376.2;ZC376.1;T02B5.3;cest-1
gi|162287142|ref|NP_038523.2|	0.1	1	192	253	8	0	3	0	0	5	metabolism	carnitine O-palmitoyltransferase 1, liver isoform [Mus musculus]	NP_038523	ENSMUSG00000024900	12894	Cpt1a	WBGene00012907;WBGene00021002	cpt-1;W03F9.4
gi|157951741|ref|NP_033934.2|	0.23	1	170	200	15	0	10	2	0	3	metabolism	catalase [Mus musculus]	NP_033934	ENSMUSG00000027187	12359	Cat	WBGene00000831;WBGene00000830;WBGene00013220	ctl-2;ctl-1;ctl-3
gi|19527228|ref|NP_598768.1|	0.36	1	241	438	9	0	4	1	3	1	metabolism	CDGSH iron-sulfur domain-containing protein 1 [Mus musculus]	NP_598768	ENSMUSG00000037710	52637	Cisd1	WBGene00044026	cisd-1
gi|28076897|ref|NP_080914.1|	0.16	2	269	434	14	3	3	3	0	5	metabolism	CDP-diacylglycerol--inositol 3-phosphatidyltransferase isoform 1 [Mus musculus]	NP_080914	ENSMUSG00000030682	52858	Cdipt	WBGene00012897	pisy-1
gi|21362277|ref|NP_620093.1|	0.16	1	269	434	14	3	3	3	0	5	metabolism	CDP-diacylglycerol--inositol 3-phosphatidyltransferase isoform 2 [Mus musculus]	NP_620093				nan	nan
gi|124487350|ref|NP_033868.3|	0.05	1	72	88	5	3	0	0	1	1	metabolism	cholinesterase precursor [Mus musculus]	NP_033868	ENSMUSG00000027792	12038	Bche	WBGene00000036	ace-2
gi|21703854|ref|NP_663403.1|	0.17	1	283	390	11	3	1	1	2	4	metabolism	dehydrogenase/reductase SDR family member 7B [Mus musculus]	NP_663403	ENSMUSG00000042569	216820	Dhrs7b	WBGene00000975;WBGene00011424;WBGene00000993;WBGene00219274;WBGene00000981;WBGene00000970;WBGene00008986;WBGene00008985;WBGene00022809	dhs-12;dhs-31;dhs-30;T25G12.13;dhs-18;dhs-6;F20G2.2;F20G2.1;ZK697.14
gi|255958292|ref|NP_062672.2|	0.16	1	384	216	18	3	5	3	4	3	metabolism	delta-1-pyrroline-5-carboxylate synthase [Mus musculus]	NP_062672	ENSMUSG00000025007	56454	Aldh18a1	WBGene00011938	alh-13
gi|6753632|ref|NP_034176.1|	0.2	1	592	261	16	5	5	3	2	1	metabolism	diacylglycerol O-acyltransferase 1 [Mus musculus]	NP_034176	ENSMUSG00000022555	13350	Dgat1	WBGene00010408	mboa-2
gi|21450117|ref|NP_659127.1|	0.07	1	273	405	8	1	1	1	1	4	metabolism	dimethylaniline monooxygenase [N-oxide-forming] 4 [Mus musculus]	NP_659127	ENSMUSG00000026692	226564	Fmo4	WBGene00007254;WBGene00016728;WBGene00001478;WBGene00001480;WBGene00001476	C01H6.4;C46H11.2;fmo-3;fmo-5;fmo-1
gi|125628640|ref|NP_808278.2|	0.07	1	76	244	13	2	2	5	2	2	metabolism	dual oxidase 2 [Mus musculus]	NP_808278	ENSMUSG00000068452	214593	Duox2	nan	nan
gi|154240724|ref|NP_598766.2|	0.38	1	157	39	181	26	49	51	25	30	metabolism	ectonucleotide pyrophosphatase/phosphodiesterase family member 3 [Mus musculus]	NP_598766	ENSMUSG00000019989	209558	Enpp3	WBGene00007755;WBGene00007753;WBGene00015283	C27A7.3;C27A7.1;C01B10.9
gi|145966840|ref|NP_031972.2|	0.14	1	121	195	21	0	5	8	1	7	metabolism	eosinophil peroxidase precursor [Mus musculus]	NP_031972	ENSMUSG00000052234	13861	Epx	WBGene00016700;WBGene00019613;WBGene00004256;WBGene00004257	C46A5.4;K10B4.1;pxn-1;pxn-2
gi|31982393|ref|NP_031966.2|	0.14	1	476	365	6	0	0	1	2	3	metabolism	epoxide hydrolase 2 [Mus musculus]	NP_031966	ENSMUSG00000022040	13850	Ephx2	WBGene00022258;WBGene00019525;WBGene00017335;WBGene00022260;WBGene00022259;WBGene00018077;WBGene00007854	Y73C8B.1;K08D9.4;F10D2.10;Y73C8B.3;Y73C8B.2;F35H12.5;C31H5.1
gi|16716597|ref|NP_444492.1|	0.49	1	201	82	57	14	13	11	6	13	metabolism	estradiol 17-beta-dehydrogenase 11 [Mus musculus]	NP_444492	ENSMUSG00000029311	114664	Hsd17b11	nan	nan
gi|9789991|ref|NP_062631.1|	0.26	1	656	285	7	3	4	0	0	0	metabolism	estradiol 17-beta-dehydrogenase 12 [Mus musculus]	NP_062631	ENSMUSG00000027195	56348	Hsd17b12	nan	nan
gi|75677435|ref|NP_031463.2|	0.37	1	623	31	71	17	22	10	6	16	metabolism	fatty aldehyde dehydrogenase [Mus musculus]	NP_031463	ENSMUSG00000010025	11671	Aldh3a2	WBGene00000109;WBGene00000107;WBGene00000108	alh-3;alh-1;alh-2
gi|226443015|ref|NP_034303.3|	0.18	1	314	232	21	3	6	6	2	4	metabolism	fatty-acid amide hydrolase 1 [Mus musculus]	NP_034303	ENSMUSG00000034171	14073	Faah	WBGene00012750;WBGene00015048;WBGene00015047;WBGene00013226;WBGene00013232	faah-6;faah-2;faah-1;faah-5;faah-4
gi|27370046|ref|NP_766303.1|	0.14	1	405	369	6	1	0	2	0	3	metabolism	glycerol-3-phosphate acyltransferase 3 [Mus musculus]	NP_766303	ENSMUSG00000029314	231510	Gpat3	WBGene00010902;WBGene00018657;WBGene00011106	M79.2;acl-4;acl-5
gi|23956140|ref|NP_079914.1|	0.24	1	341	270	13	2	4	3	2	2	metabolism	glycerophosphodiester phosphodiesterase domain-containing protein 1 [Mus musculus]	NP_079914	ENSMUSG00000061666	66569	Gdpd1	nan	nan
gi|17647499|ref|NP_058652.1|	0.15	1	212	500	5	0	0	3	0	2	metabolism	hemoglobin subunit beta-2 [Mus musculus]	NP_058652				nan	nan
gi|225735584|ref|NP_001139572.1|	0.05	2	309	55	7	2	3	1	0	1	metabolism	hexokinase-1 isoform HK1 [Mus musculus]	NP_001139572	ENSMUSG00000037012	15275	Hk1	nan	nan
gi|19527026|ref|NP_598568.1|	0.26	1	236	287	24	6	6	5	0	7	metabolism	leucine-rich repeat-containing protein 59 [Mus musculus]	NP_598568	ENSMUSG00000020869	98238	Lrrc59	nan	nan
gi|114158675|ref|NP_079705.2|	0.23	1	35	279	9	2	1	2	0	4	metabolism	leukocyte elastase inhibitor A [Mus musculus]	NP_079705	ENSMUSG00000044734	66222	Serpinb1a	nan	nan
gi|11967965|ref|NP_071879.1|	0.12	1	56	177	11	1	4	3	0	3	metabolism	leukotriene-B4 omega-hydroxylase 3 [Mus musculus]	NP_071879	ENSMUSG00000024292	64385	Cyp4f14	WBGene00007140;WBGene00021412;WBGene00010354;WBGene00021200;WBGene00013381;WBGene00016147;WBGene00009226	cyp-29A4;cyp-29A3;cyp-31A2;cyp-31A3;cyp-31A5;cyp-32A1;cyp-37B1
gi|21450339|ref|NP_659179.1|	0.16	1	276	309	8	3	5	0	0	0	metabolism	liver carboxylesterase B-1 [Mus musculus]	NP_659179	ENSMUSG00000031725	234564	Ces1f	WBGene00006412;WBGene00007695;WBGene00007692;WBGene00007691;WBGene00007693;WBGene00008451;WBGene00001578;WBGene00016862;WBGene00015071;WBGene00015067;WBGene00016863;WBGene00018958;WBGene00020688;WBGene00016595;WBGene00015284;WBGene00015279;WBGene00000037;WBGene00000038;WBGene00013875;WBGene00013874;WBGene00013873;WBGene00011364;WBGene00011362	nlg-1;C23H4.7;C23H4.3;C23H4.2;C23H4.4;E01G6.3;ges-1;C52A10.1;B0238.7;B0238.1;C52A10.2;F56C11.6;T22D1.11;C42D4.2;C01B10.10;C01B10.4;ace-3;ace-4;ZC376.3;ZC376.2;ZC376.1;T02B5.3;cest-1
gi|45597453|ref|NP_036119.1|	0.45	1	509	47	77	16	33	17	2	9	metabolism	long-chain fatty acid transport protein 4 [Mus musculus]	NP_036119	ENSMUSG00000059316	26569	Slc27a4	WBGene00019920;WBGene00011173;WBGene00022849;WBGene00007082;WBGene00009218;WBGene00008669	acs-15;acs-18;acs-6;acs-10;acs-20;acs-14
gi|31560705|ref|NP_032007.2|	0.06	1	457	25	34	5	12	7	4	6	metabolism	long-chain-fatty-acid--CoA ligase 1 [Mus musculus]	NP_032007	ENSMUSG00000018796	14081	Acsl1	WBGene00019920;WBGene00011173;WBGene00022849;WBGene00007082;WBGene00009218;WBGene00008669	acs-15;acs-18;acs-6;acs-10;acs-20;acs-14
gi|58218988|ref|NP_082252.1|	0.58	1	531	25	366	68	88	80	65	65	metabolism	long-chain-fatty-acid--CoA ligase 5 [Mus musculus]	NP_082252	ENSMUSG00000024981	433256	Acsl5	WBGene00022037	acs-13
gi|124486722|ref|NP_001074540.1|	0.1	1	63	439	9	0	2	1	0	6	metabolism	lysocardiolipin acyltransferase 1 [Mus musculus]	NP_001074540	ENSMUSG00000054469	225010	Lclat1	WBGene00044631;WBGene00020264;WBGene00022646	bus-18;acl-8;acl-9
gi|95007017|ref|NP_778160.2|	0.41	1	654	381	22	3	5	8	5	1	metabolism	microsomal glutathione S-transferase 2 [Mus musculus]	NP_778160	ENSMUSG00000074604	211666	Mgst2	nan	nan
gi|31560264|ref|NP_079617.2|	0.19	1	455	273	12	4	4	2	0	2	metabolism	monoacylglycerol lipase ABHD6 [Mus musculus]	NP_079617	ENSMUSG00000025277	66082	Abhd6	WBGene00009316	abhd-11.1
gi|45476581|ref|NP_035457.1|	0.1	1	507	293	13	2	10	1	0	0	metabolism	non-specific lipid-transfer protein [Mus musculus]	NP_035457	ENSMUSG00000028603	20280	Scp2	nan	nan
gi|251823855|ref|NP_035834.2|	0.13	1	356	395	9	4	0	1	2	2	metabolism	pantetheinase precursor [Mus musculus]	NP_035834	ENSMUSG00000037440	22361	Vnn1	nan	nan
gi|71774133|ref|NP_035279.2|	0.45	1	617	145	35	13	14	4	1	3	metabolism	peptidyl-prolyl cis-trans isomerase B precursor [Mus musculus]	NP_035279	ENSMUSG00000032383	19035	Ppib	WBGene00000885	cyn-9
gi|6754976|ref|NP_035164.1|	0.34	1	597	251	10	5	0	2	0	3	metabolism	peroxiredoxin-1 [Mus musculus]	NP_035164	ENSMUSG00000028691	18477	Prdx1	nan	nan
gi|66793429|ref|NP_056544.2|	0.33	1	556	138	28	4	10	8	0	6	metabolism	peroxisomal acyl-coenzyme A oxidase 1 [Mus musculus]	NP_056544	ENSMUSG00000020777	11430	Acox1	WBGene00015894;WBGene00016943;WBGene00008566;WBGene00008567;WBGene00008565;WBGene00008564;WBGene00019406;WBGene00020366	acdh-2;acdh-1;acox-1.3;acox-1.4;acox-1.2;acox-1.1;acdh-8;acdh-10
gi|31541815|ref|NP_076226.2|	0.27	1	448	120	25	3	11	6	1	4	metabolism	peroxisomal bifunctional enzyme [Mus musculus]	NP_076226	ENSMUSG00000022853	74147	Ehhadh	WBGene00001157;WBGene00001158	ech-8;ech-9
gi|31982273|ref|NP_032318.2|	0.2	1	475	146	32	6	10	7	3	6	metabolism	peroxisomal multifunctional enzyme type 2 [Mus musculus]	NP_032318	ENSMUSG00000024507	15488	Hsd17b4	WBGene00000991	dhs-28
gi|6755919|ref|NP_035794.1|	0.15	3	87	379	44	11	11	9	5	8	metabolism	polyubiquitin-B [Mus musculus]	NP_035794	ENSMUSG00000019505	22187	Ubb	WBGene00010654;WBGene00009378;WBGene00006725	K08C9.7;F34H10.1;ubl-1
gi|157671923|ref|NP_062613.3|	0.06	2	87	379	44	11	11	9	5	8	metabolism	polyubiquitin-C [Mus musculus]	NP_062613	ENSMUSG00000008348	22190	Ubc	WBGene00006727	ubq-1
gi|42415475|ref|NP_035162.1|	0.58	1	506	50	150	44	49	25	14	18	metabolism	protein disulfide-isomerase precursor [Mus musculus]	NP_035162	ENSMUSG00000025130	18453	P4hb	WBGene00003962;WBGene00014807;WBGene00003963	pdi-1;M04D5.1;pdi-2
gi|6678329|ref|NP_033399.1|	0.07	1	549	410	7	0	1	4	0	2	metabolism	protein-glutamine gamma-glutamyltransferase 2 [Mus musculus]	NP_033399	ENSMUSG00000037820	21817	Tgm2	nan	nan
gi|7305395|ref|NP_038660.1|	0.3	1	620	198	19	7	8	2	1	1	metabolism	purine nucleoside phosphorylase [Mus musculus]	NP_038660	ENSMUSG00000115338	18950	Pnp	WBGene00019298	K02D7.1
gi|21703836|ref|NP_663394.1|	0.26	1	282	55	54	22	16	9	1	6	metabolism	putative hexokinase HKDC1 [Mus musculus]	NP_663394	ENSMUSG00000020080	216019	Hkdc1	nan	nan
gi|31981562|ref|NP_035229.2|	0.38	1	469	92	40	9	2	12	5	12	metabolism	pyruvate kinase isozymes M1/M2 [Mus musculus]	NP_035229	ENSMUSG00000032294	18746	Pkm	WBGene00009126;WBGene00014001	pyk-1;pyk-2
gi|8567342|ref|NP_059501.1|	0.28	2	315	194	14	4	7	0	3	0	metabolism	retinol dehydrogenase 7 [Mus musculus]	NP_059501	ENSMUSG00000040134	54150	Rdh7	nan	nan
gi|23680945|ref|NP_694773.1|	0.24	1	333	194	16	4	6	3	2	1	metabolism	retinol dehydrogenase 9 [Mus musculus]	NP_694773	ENSMUSG00000056148	103142	Rdh9	nan	nan
gi|27370510|ref|NP_766594.1|	0.22	1	407	336	10	2	2	3	0	3	metabolism	serum paraoxonase/lactonase 3 [Mus musculus]	NP_766594	ENSMUSG00000029759	269823	Pon3	WBGene00044697;WBGene00077701;WBGene00017089;WBGene00010775;WBGene00003170	poml-4;poml-3;poml-2;poml-1;mec-6
gi|9845263|ref|NP_063931.1|	0.25	1	660	277	9	1	0	2	2	4	metabolism	sulfotransferase family cytosolic 1B member 1 [Mus musculus]	NP_063931	ENSMUSG00000029269	56362	Sult1b1	nan	nan
gi|19923070|ref|NP_598879.1|	0.17	1	245	367	6	1	2	0	1	2	metabolism	trans-2,3-enoyl-CoA reductase [Mus musculus]	NP_598879	ENSMUSG00000031708	106529	Tecr	WBGene00000198	art-1
gi|30794162|ref|NP_083122.1|	0.01	1	435	503	5	0	0	2	3	0	metabolism	ubiquitin carboxyl-terminal hydrolase 20 [Mus musculus]	NP_083122	ENSMUSG00000026854	74270	Usp20	nan	nan
gi|236466498|ref|NP_942602.2|	0.05	1	332	408	7	0	0	2	3	2	metabolism	UDP-glucose:glycoprotein glucosyltransferase 1 precursor [Mus musculus]	NP_942602	ENSMUSG00000037470	320011	Uggt1	nan	nan
gi|145699099|ref|NP_964007.2|	0.3	1	119	22	97	20	25	18	14	20	metabolism	UDP-glucuronosyltransferase 1-1 [Mus musculus]	NP_964007	ENSMUSG00000089960	394436	Ugt1a1	WBGene00018206;WBGene00010904;WBGene00015369;WBGene00015371;WBGene00019516;WBGene00019515;WBGene00007885;WBGene00007455;WBGene00012788;WBGene00018931;WBGene00015577;WBGene00011006;WBGene00015141;WBGene00015965;WBGene00008097;WBGene00007422;WBGene00013900;WBGene00008486;WBGene00015449;WBGene00017959;WBGene00017336;WBGene00007402;WBGene00019234;WBGene00020594;WBGene00020587;WBGene00019235;WBGene000…	ugt-61;ugt-62;ugt-51;C03A7.13;ugt-20;ugt-19;ugt-21;ugt-22;Y43D4A.2;ugt-52;ugt-64;ugt-47;ugt-46;ugt-48;ugt-15;ugt-17;ugt-18;ugt-44;ugt-63;ugt-42;ugt-41;ugt-60;ugt-8;ugt-10;ugt-9;H23N18.4;ugt-14;ugt-13;ugt-11;ugt-12;T19H12.12;ugt-37;ugt-36;F10D2.8;ugt-40;ugt-56;ugt-55;ugt-66;ugt-27;ugt-26;ugt-32;ugt-1;ugt-2;ugt-34;ugt-35;ugt-33;ugt-39;ugt-38;ugt-28;ugt-29;ugt-30;ugt-4;ugt-7;ugt-5
gi|47059123|ref|NP_964004.1|	0.35	1	516	22	80	15	21	16	12	16	metabolism	UDP-glucuronosyltransferase 1-7C precursor [Mus musculus]	NP_964004	ENSMUSG00000090124	394432	Ugt1a7c	WBGene00018206;WBGene00010904;WBGene00015369;WBGene00015371;WBGene00019516;WBGene00019515;WBGene00007885;WBGene00007455;WBGene00012788;WBGene00018931;WBGene00015577;WBGene00011006;WBGene00015141;WBGene00015965;WBGene00008097;WBGene00007422;WBGene00013900;WBGene00008486;WBGene00015449;WBGene00017959;WBGene00017336;WBGene00007402;WBGene00019234;WBGene00020594;WBGene00020587;WBGene00019235;WBGene000…	ugt-61;ugt-62;ugt-51;C03A7.13;ugt-20;ugt-19;ugt-21;ugt-22;Y43D4A.2;ugt-52;ugt-64;ugt-47;ugt-46;ugt-48;ugt-15;ugt-17;ugt-18;ugt-44;ugt-63;ugt-42;ugt-41;ugt-60;ugt-8;ugt-10;ugt-9;H23N18.4;ugt-14;ugt-13;ugt-11;ugt-12;T19H12.12;ugt-37;ugt-36;F10D2.8;ugt-40;ugt-56;ugt-55;ugt-66;ugt-27;ugt-26;ugt-32;ugt-1;ugt-2;ugt-34;ugt-35;ugt-33;ugt-39;ugt-38;ugt-28;ugt-29;ugt-30;ugt-4;ugt-7;ugt-5
gi|145864463|ref|NP_964006.2|	0.18	1	120	22	65	13	16	10	12	14	metabolism	UDP-glucuronosyltransferase 1-9 precursor [Mus musculus]	NP_964006	ENSMUSG00000090175	394434	Ugt1a9	WBGene00018206;WBGene00010904;WBGene00015369;WBGene00015371;WBGene00019516;WBGene00019515;WBGene00007885;WBGene00007455;WBGene00012788;WBGene00018931;WBGene00015577;WBGene00011006;WBGene00015141;WBGene00015965;WBGene00008097;WBGene00007422;WBGene00013900;WBGene00008486;WBGene00015449;WBGene00017959;WBGene00017336;WBGene00007402;WBGene00019234;WBGene00020594;WBGene00020587;WBGene00019235;WBGene000…	ugt-61;ugt-62;ugt-51;C03A7.13;ugt-20;ugt-19;ugt-21;ugt-22;Y43D4A.2;ugt-52;ugt-64;ugt-47;ugt-46;ugt-48;ugt-15;ugt-17;ugt-18;ugt-44;ugt-63;ugt-42;ugt-41;ugt-60;ugt-8;ugt-10;ugt-9;H23N18.4;ugt-14;ugt-13;ugt-11;ugt-12;T19H12.12;ugt-37;ugt-36;F10D2.8;ugt-40;ugt-56;ugt-55;ugt-66;ugt-27;ugt-26;ugt-32;ugt-1;ugt-2;ugt-34;ugt-35;ugt-33;ugt-39;ugt-38;ugt-28;ugt-29;ugt-30;ugt-4;ugt-7;ugt-5
gi|158937326|ref|NP_444414.2|	0.05	1	173	22	5	0	1	0	2	2	metabolism	UDP-glucuronosyltransferase 2A1 precursor [Mus musculus]	NP_444414	ENSMUSG00000106677	94215	Ugt2a1	WBGene00018206;WBGene00010904;WBGene00015369;WBGene00015371;WBGene00019516;WBGene00019515;WBGene00007885;WBGene00007455;WBGene00012788;WBGene00018931;WBGene00015577;WBGene00011006;WBGene00015141;WBGene00015965;WBGene00008097;WBGene00007422;WBGene00013900;WBGene00008486;WBGene00015449;WBGene00017959;WBGene00017336;WBGene00007402;WBGene00019234;WBGene00020594;WBGene00020587;WBGene00019235;WBGene000…	ugt-61;ugt-62;ugt-51;C03A7.13;ugt-20;ugt-19;ugt-21;ugt-22;Y43D4A.2;ugt-52;ugt-64;ugt-47;ugt-46;ugt-48;ugt-15;ugt-17;ugt-18;ugt-44;ugt-63;ugt-42;ugt-41;ugt-60;ugt-8;ugt-10;ugt-9;H23N18.4;ugt-14;ugt-13;ugt-11;ugt-12;T19H12.12;ugt-37;ugt-36;F10D2.8;ugt-40;ugt-56;ugt-55;ugt-66;ugt-27;ugt-26;ugt-32;ugt-1;ugt-2;ugt-34;ugt-35;ugt-33;ugt-39;ugt-38;ugt-28;ugt-29;ugt-30;ugt-4;ugt-7;ugt-5
gi|254587896|ref|NP_082370.2|	0.2	1	365	22	16	3	3	5	3	2	metabolism	UDP-glucuronosyltransferase 2A3 precursor [Mus musculus]	NP_082370	ENSMUSG00000035780	72094	Ugt2a3	WBGene00018206;WBGene00010904;WBGene00015369;WBGene00015371;WBGene00019516;WBGene00019515;WBGene00007885;WBGene00007455;WBGene00012788;WBGene00018931;WBGene00015577;WBGene00011006;WBGene00015141;WBGene00015965;WBGene00008097;WBGene00007422;WBGene00013900;WBGene00008486;WBGene00015449;WBGene00017959;WBGene00017336;WBGene00007402;WBGene00019234;WBGene00020594;WBGene00020587;WBGene00019235;WBGene000…	ugt-61;ugt-62;ugt-51;C03A7.13;ugt-20;ugt-19;ugt-21;ugt-22;Y43D4A.2;ugt-52;ugt-64;ugt-47;ugt-46;ugt-48;ugt-15;ugt-17;ugt-18;ugt-44;ugt-63;ugt-42;ugt-41;ugt-60;ugt-8;ugt-10;ugt-9;H23N18.4;ugt-14;ugt-13;ugt-11;ugt-12;T19H12.12;ugt-37;ugt-36;F10D2.8;ugt-40;ugt-56;ugt-55;ugt-66;ugt-27;ugt-26;ugt-32;ugt-1;ugt-2;ugt-34;ugt-35;ugt-33;ugt-39;ugt-38;ugt-28;ugt-29;ugt-30;ugt-4;ugt-7;ugt-5
gi|23956406|ref|NP_705826.1|	0.36	1	345	22	54	10	17	11	10	6	metabolism	UDP-glucuronosyltransferase 2B10 [Mus musculus]	NP_705826	ENSMUSG00000029260	100727	Ugt2b34	WBGene00018206;WBGene00010904;WBGene00015369;WBGene00015371;WBGene00019516;WBGene00019515;WBGene00007885;WBGene00007455;WBGene00012788;WBGene00018931;WBGene00015577;WBGene00011006;WBGene00015141;WBGene00015965;WBGene00008097;WBGene00007422;WBGene00013900;WBGene00008486;WBGene00015449;WBGene00017959;WBGene00017336;WBGene00007402;WBGene00019234;WBGene00020594;WBGene00020587;WBGene00019235;WBGene000…	ugt-61;ugt-62;ugt-51;C03A7.13;ugt-20;ugt-19;ugt-21;ugt-22;Y43D4A.2;ugt-52;ugt-64;ugt-47;ugt-46;ugt-48;ugt-15;ugt-17;ugt-18;ugt-44;ugt-63;ugt-42;ugt-41;ugt-60;ugt-8;ugt-10;ugt-9;H23N18.4;ugt-14;ugt-13;ugt-11;ugt-12;T19H12.12;ugt-37;ugt-36;F10D2.8;ugt-40;ugt-56;ugt-55;ugt-66;ugt-27;ugt-26;ugt-32;ugt-1;ugt-2;ugt-34;ugt-35;ugt-33;ugt-39;ugt-38;ugt-28;ugt-29;ugt-30;ugt-4;ugt-7;ugt-5
gi|113374154|ref|NP_036108.2|	0.24	1	30	218	15	1	4	4	3	3	metabolism	very long-chain acyl-CoA synthetase [Mus musculus]	NP_036108	ENSMUSG00000027359	26458	Slc27a2	WBGene00019920;WBGene00011173;WBGene00016108;WBGene00022849;WBGene00007082;WBGene00016716;WBGene00009218;WBGene00008669	acs-15;acs-18;C25G6.3;acs-6;acs-10;acs-17;acs-20;acs-14
gi|85861164|ref|NP_035086.2|	0.23	1	646	114	32	2	16	6	2	6	mitochondrial	2-oxoglutarate dehydrogenase, mitochondrial precursor [Mus musculus]	NP_035086	ENSMUSG00000020456	18293	Ogdh	WBGene00020679	ogdh-1
gi|13385680|ref|NP_080448.1|	0.21	1	102	300	10	1	6	2	0	1	mitochondrial	2,4-dienoyl-CoA reductase, mitochondrial precursor [Mus musculus]	NP_080448	ENSMUSG00000028223	67460	Decr1	WBGene00011467;WBGene00009973;WBGene00012177	decr-1.3;F53C11.3;decr-1.2
gi|29126205|ref|NP_803421.1|	0.41	1	420	166	19	0	17	0	0	2	mitochondrial	3-ketoacyl-CoA thiolase, mitochondrial [Mus musculus]	NP_803421	ENSMUSG00000036880	52538	Acaa2	WBGene00009952	acaa-2
gi|183396771|ref|NP_034607.3|	0.19	1	218	183	22	0	12	7	0	3	mitochondrial	60 kDa heat shock protein, mitochondrial [Mus musculus]	NP_034607	ENSMUSG00000025980	15510	Hspd1	WBGene00002025	hsp-60
gi|18079339|ref|NP_542364.1|	0.3	1	214	105	31	0	25	2	2	2	mitochondrial	aconitate hydratase, mitochondrial precursor [Mus musculus]	NP_542364	ENSMUSG00000022477	11429	Aco2	WBGene00000041	aco-2
gi|148747424|ref|NP_031476.3|	0.47	1	129	49	117	16	22	15	43	21	mitochondrial	ADP/ATP translocase 1 [Mus musculus]	NP_031476	ENSMUSG00000031633	11739	Slc25a4	nan	nan
gi|22094075|ref|NP_031477.1|	0.66	1	290	49	270	56	67	35	64	48	mitochondrial	ADP/ATP translocase 2 [Mus musculus]	NP_031477	ENSMUSG00000016319	11740	Slc25a5	nan	nan
gi|21312260|ref|NP_082546.1|	0.36	1	254	31	53	7	36	5	1	4	mitochondrial	aldehyde dehydrogenase X, mitochondrial precursor [Mus musculus]	NP_082546	ENSMUSG00000035561	72535	Aldh1b1	WBGene00000109;WBGene00000107;WBGene00000108;WBGene00000110;WBGene00000111	alh-3;alh-1;alh-2;alh-4;alh-5
gi|6753036|ref|NP_033786.1|	0.32	1	580	31	28	4	20	4	0	0	mitochondrial	aldehyde dehydrogenase, mitochondrial precursor [Mus musculus]	NP_033786	ENSMUSG00000029455	11669	Aldh2	WBGene00000107;WBGene00000108	alh-1;alh-2
gi|255759902|ref|NP_776101.3|	0.4	1	383	42	90	16	40	13	9	12	mitochondrial	amine oxidase [flavin-containing] A [Mus musculus]	NP_776101	ENSMUSG00000025037	17161	Maoa	WBGene00011615;WBGene00005010	lsd-1;spr-5
gi|257196228|ref|NP_766366.2|	0.35	1	388	42	30	2	14	4	3	7	mitochondrial	amine oxidase [flavin-containing] B [Mus musculus]	NP_766366	ENSMUSG00000040147	109731	Maob	WBGene00011615;WBGene00005010;WBGene00000137	lsd-1;spr-5;amx-1
gi|6753110|ref|NP_033835.1|	0.23	1	582	264	16	0	13	1	0	2	mitochondrial	arginase-2, mitochondrial precursor [Mus musculus]	NP_033835	ENSMUSG00000021125	11847	Arg2	nan	nan
gi|226453479|ref|YP_002791046.1|	0.34	2	204	482	10	1	5	3	0	1	mitochondrial	ATP synthase F0 subunit 8 [Mus musculus castaneus]	YP_002791046				nan	nan
gi|6680748|ref|NP_031531.1|	0.56	1	570	43	319	85	77	58	51	48	mitochondrial	ATP synthase subunit alpha, mitochondrial precursor [Mus musculus]	NP_031531	ENSMUSG00000025428	11946	Atp5a1	WBGene00012040;nan	T26E3.7;nan
gi|6680748|ref|NP_031531.1|	0.56	1	570	43	319	85	77	58	51	48	mitochondrial	ATP synthase subunit alpha, mitochondrial precursor [Mus musculus]	NP_031531	ENSMUSG00000116276	11946	Atp5a1	WBGene00012040;nan	T26E3.7;nan
gi|78214312|ref|NP_033855.2|	0.41	1	626	126	48	15	14	7	5	7	mitochondrial	ATP synthase subunit b, mitochondrial precursor [Mus musculus]	NP_033855	ENSMUSG00000000563	11950	Atp5f1	WBGene00000206;WBGene00000207	asb-1;asb-2
gi|31980648|ref|NP_058054.2|	0.72	1	459	36	327	74	92	57	51	53	mitochondrial	ATP synthase subunit beta, mitochondrial precursor [Mus musculus]	NP_058054	ENSMUSG00000025393	11947	Atp5b	WBGene00000229	atp-2
gi|21313679|ref|NP_082138.1|	0.46	1	266	294	13	4	3	0	1	5	mitochondrial	ATP synthase subunit d, mitochondrial [Mus musculus]	NP_082138	ENSMUSG00000034566	71679	Atp5h	WBGene00007385	atp-5
gi|83715998|ref|NP_031533.2|	0.31	1	633	445	8	2	2	2	0	2	mitochondrial	ATP synthase subunit e, mitochondrial [Mus musculus]	NP_031533	ENSMUSG00000050856	11958	Atp5k	WBGene00011015	R04F11.2
gi|10181184|ref|NP_065607.1|	0.26	1	11	325	14	2	8	3	1	0	mitochondrial	ATP synthase subunit f, mitochondrial [Mus musculus]	NP_065607	ENSMUSG00000038690	57423	Atp5j2	WBGene00011273	R53.4
gi|31980744|ref|NP_038823.2|	0.49	2	136	315	32	6	7	6	1	12	mitochondrial	ATP synthase subunit g, mitochondrial [Mus musculus]	NP_038823	ENSMUSG00000038717	27425	Atp5l	WBGene00000210;WBGene00000209	asg-2;asg-1
gi|163838641|ref|NP_065640.2|	0.33	1	195	174	45	16	12	5	2	10	mitochondrial	ATP synthase subunit gamma, mitochondria [Mus musculus]	NP_065640	ENSMUSG00000025781	11949	Atp5c1	WBGene00022089	Y69A2AR.18
gi|20070412|ref|NP_613063.1|	0.59	2	134	111	76	20	23	19	6	8	mitochondrial	ATP synthase subunit O, mitochondrial precursor [Mus musculus]	NP_613063	ENSMUSG00000022956	28080	Atp5o	WBGene00000230	atp-3
gi|21703976|ref|NP_663471.1|	0.19	1	285	281	8	1	1	3	0	3	mitochondrial	bifunctional ATP-dependent dihydroxyacetone kinase/FAD-AMP lyase (cyclizing) [Mus musculus]	NP_663471	ENSMUSG00000034371	225913	Tkfc	WBGene00020962	W02H5.8
gi|27369581|ref|NP_766024.1|	0.11	1	402	422	5	1	2	2	0	0	mitochondrial	calcium-binding mitochondrial carrier protein Aralar1 [Mus musculus]	NP_766024	ENSMUSG00000027010	78830	Slc25a12	WBGene00019326	K02F3.2
gi|27369998|ref|NP_766273.1|	0.08	1	404	417	6	1	2	0	1	2	mitochondrial	calcium-binding mitochondrial carrier protein SCaMC-1 [Mus musculus]	NP_766273	ENSMUSG00000040322	229731	Slc25a24	nan	nan
gi|124248512|ref|NP_001074278.1|	0.29	1	60	35	101	24	47	11	2	17	mitochondrial	carbamoyl-phosphate synthase [ammonia], mitochondrial precursor [Mus musculus]	NP_001074278	ENSMUSG00000025991	227231	Cps1	nan	nan
gi|162138915|ref|NP_034079.2|	0.17	1	191	274	11	3	1	4	0	3	mitochondrial	carnitine O-palmitoyltransferase 2, mitochondrial precursor [Mus musculus]	NP_034079	ENSMUSG00000028607	12896	Cpt2	WBGene00011122	cpt-2
gi|210031252|ref|NP_758468.2|	0.28	1	251	139	22	4	7	3	2	6	mitochondrial	choline dehydrogenase, mitochondrial precursor [Mus musculus]	NP_758468	ENSMUSG00000015970	218865	Chdh	WBGene00007917	C34C6.4
gi|13385942|ref|NP_080720.1|	0.1	1	103	402	8	0	7	0	0	1	mitochondrial	citrate synthase, mitochondrial precursor [Mus musculus]	NP_080720	ENSMUSG00000005683	12974	Cs	WBGene00000833	cts-1
gi|21313618|ref|NP_079612.1|	0.19	1	264	414	6	2	2	1	0	1	mitochondrial	coiled-coil-helix-coiled-coil-helix domain-containing protein 3, mitochondrial precursor [Mus musculus]	NP_079612	ENSMUSG00000053768	66075	Chchd3	WBGene00010942	chch-3
gi|6753428|ref|NP_034027.1|	0.45	1	588	125	50	18	17	3	9	3	mitochondrial	creatine kinase U-type, mitochondrial precursor [Mus musculus]	NP_034027	ENSMUSG00000000308	12716	Ckmt1	WBGene00013894;WBGene00021128;WBGene00009706;WBGene00017975;WBGene00018519	ZC434.8;W10C8.5;argk-1;F32B5.1;F46H5.3
gi|46593021|ref|NP_079683.2|	0.4	1	513	133	48	19	11	6	2	10	mitochondrial	cytochrome b-c1 complex subunit 1, mitochondrial precursor [Mus musculus]	NP_079683	ENSMUSG00000025651	22273	Uqcrc1	WBGene00015481;WBGene00011679;nan	C05D11.1;ucr-2.2;nan
gi|46593021|ref|NP_079683.2|	0.4	1	513	133	48	19	11	6	2	10	mitochondrial	cytochrome b-c1 complex subunit 1, mitochondrial precursor [Mus musculus]	NP_079683	ENSMUSG00000107235	22273	Uqcrc1	WBGene00015481;WBGene00011679;nan	C05D11.1;ucr-2.2;nan
gi|22267442|ref|NP_080175.1|	0.53	1	299	71	76	23	18	16	8	11	mitochondrial	cytochrome b-c1 complex subunit 2, mitochondrial precursor [Mus musculus]	NP_080175	ENSMUSG00000030884	67003	Uqcrc2	WBGene00011679	ucr-2.2
gi|21539585|ref|NP_079628.1|	0.43	1	279	321	16	1	0	2	7	6	mitochondrial	cytochrome b-c1 complex subunit 8 [Mus musculus]	NP_079628	ENSMUSG00000044894	22272	Uqcrq	WBGene00009739;WBGene00019937	F45H10.2;R07E4.3
gi|13385168|ref|NP_079986.1|	0.34	1	97	252	10	3	4	1	1	1	mitochondrial	cytochrome b-c1 complex subunit Rieske, mitochondrial [Mus musculus]	NP_079986	ENSMUSG00000038462	66694	Uqcrfs1	WBGene00002162	isp-1
gi|13385268|ref|NP_080073.1|	0.48	1	98	316	25	5	8	3	4	5	mitochondrial	cytochrome b5 [Mus musculus]	NP_080073	ENSMUSG00000024646	109672	Cyb5a	WBGene00020931	cytb-5.2
gi|31542438|ref|NP_079834.2|	0.47	1	450	288	20	1	7	6	2	4	mitochondrial	cytochrome b5 type B precursor [Mus musculus]	NP_079834	ENSMUSG00000031924	66427	Cyb5b	WBGene00007848	cytb-5.1
gi|6753498|ref|NP_034071.1|	0.44	1	591	230	24	5	11	4	2	2	mitochondrial	cytochrome c oxidase subunit 4 isoform 1, mitochondrial precursor [Mus musculus]	NP_034071	ENSMUSG00000031818	12857	Cox4i1	WBGene00012354	cox-4
gi|112181182|ref|NP_031773.2|	0.53	1	24	272	12	4	1	2	0	5	mitochondrial	cytochrome c oxidase subunit 5A, mitochondrial precursor [Mus musculus]	NP_031773	ENSMUSG00000000088	12858	Cox5a	WBGene00012553	cox-5A
gi|112807195|ref|NP_034072.2|	0.36	1	28	398	9	2	6	0	0	1	mitochondrial	cytochrome c oxidase subunit 5B, mitochondrial [Mus musculus]	NP_034072	ENSMUSG00000061518	12859	Cox5b	nan	nan
gi|13385090|ref|NP_079904.1|	0.53	1	96	385	13	1	7	1	1	3	mitochondrial	cytochrome c oxidase subunit 6B1 [Mus musculus]	NP_079904	ENSMUSG00000036751	110323	Cox6b1	WBGene00022170	cox-6B
gi|16716343|ref|NP_444301.1|	0.37	3	143	383	16	5	6	3	2	0	mitochondrial	cytochrome c oxidase subunit 6C [Mus musculus]	NP_444301	ENSMUSG00000014313	12864	Cox6c	nan	nan
gi|226453478|ref|YP_002791045.1|	0.28	2	203	188	68	13	25	16	7	7	mitochondrial	cytochrome c oxidase subunit II [Mus musculus castaneus]	YP_002791045				nan	nan
gi|13385006|ref|NP_079843.1|	0.45	1	93	129	31	3	13	5	3	7	mitochondrial	cytochrome c1, heme protein, mitochondrial [Mus musculus]	NP_079843	ENSMUSG00000022551	66445	Cyc1	WBGene00000869	cyc-1
gi|50080153|ref|NP_034129.1|	0.33	1	518	46	46	13	12	10	3	8	mitochondrial	cytochrome P450 2B10 isoform 2 [Mus musculus]	NP_034129	ENSMUSG00000030483	13088	Cyp2b10	WBGene00016092;WBGene00018334;WBGene00016768;WBGene00018333;WBGene00016860;WBGene00015709;WBGene00018261;WBGene00018264;WBGene00018413;WBGene00018262;WBGene00018260;WBGene00019967;WBGene00021710;WBGene00021168;WBGene00016697;WBGene00016686;WBGene00011698;WBGene00011699;WBGene00015400;WBGene00015399;WBGene00016786;WBGene00019565;WBGene00019473;WBGene00007362;WBGene00019471;WBGene00019470;WBGene000…	cyp-33B1;cyp-33E2;cyp-33E1;cyp-33E3;cyp-33C9;cyp-33A1;cyp-33C5;cyp-33C6;cyp-33C4;cyp-33C3;cyp-33C7;cyp-33C8;cyp-33C11;cyp-33C12;cyp-33C2;cyp-33C1;cyp-34A1;cyp-34A2;cyp-35A2;cyp-35A1;cyp-35A4;cyp-35A3;cyp-35A5;cyp-35C1;cyp-35B2;cyp-35B3;cyp-35B1;cyp-35D1;cyp-34A7;cyp-34A6;cyp-34A8;cyp-34A9;cyp-34A5;cyp-34A10;cyp-33D1;cyp-33D3
gi|13386414|ref|NP_083838.1|	0.41	1	107	73	59	9	17	11	7	15	mitochondrial	cytochrome P450 2D26 [Mus musculus]	NP_083838	ENSMUSG00000022445	76279	Cyp2d26	WBGene00016092;WBGene00018334;WBGene00016768;WBGene00018333;WBGene00016860;WBGene00015709;WBGene00018261;WBGene00018264;WBGene00018413;WBGene00018262;WBGene00018260;WBGene00019967;WBGene00021710;WBGene00021168;WBGene00016697;WBGene00016686;WBGene00011698;WBGene00011699;WBGene00015400;WBGene00015399;WBGene00016786;WBGene00019565;WBGene00019473;WBGene00007362;WBGene00019471;WBGene00019470;WBGene000…	cyp-33B1;cyp-33E2;cyp-33E1;cyp-33E3;cyp-33C9;cyp-33A1;cyp-33C5;cyp-33C6;cyp-33C4;cyp-33C3;cyp-33C7;cyp-33C8;cyp-33C11;cyp-33C12;cyp-33C2;cyp-33C1;cyp-34A1;cyp-34A2;cyp-35A2;cyp-35A1;cyp-35A4;cyp-35A3;cyp-35A5;cyp-35C1;cyp-35B2;cyp-35B3;cyp-35B1;cyp-35D1;cyp-34A7;cyp-34A6;cyp-34A8;cyp-34A9;cyp-34A5;cyp-34A10;cyp-33D1;cyp-33D3
gi|160948612|ref|NP_034136.2|	0.09	1	182	73	10	3	2	2	0	3	mitochondrial	cytochrome P450 2D9 [Mus musculus]	NP_034136	ENSMUSG00000068086	13105	Cyp2d9	WBGene00016092;WBGene00018334;WBGene00016768;WBGene00018333;WBGene00016860;WBGene00015709;WBGene00018261;WBGene00018264;WBGene00018413;WBGene00018262;WBGene00018260;WBGene00019967;WBGene00021710;WBGene00021168;WBGene00016697;WBGene00016686;WBGene00011698;WBGene00011699;WBGene00015400;WBGene00015399;WBGene00016786;WBGene00019565;WBGene00019473;WBGene00007362;WBGene00019471;WBGene00019470;WBGene000…	cyp-33B1;cyp-33E2;cyp-33E1;cyp-33E3;cyp-33C9;cyp-33A1;cyp-33C5;cyp-33C6;cyp-33C4;cyp-33C3;cyp-33C7;cyp-33C8;cyp-33C11;cyp-33C12;cyp-33C2;cyp-33C1;cyp-34A1;cyp-34A2;cyp-35A2;cyp-35A1;cyp-35A4;cyp-35A3;cyp-35A5;cyp-35C1;cyp-35B2;cyp-35B3;cyp-35B1;cyp-35D1;cyp-34A7;cyp-34A6;cyp-34A8;cyp-34A9;cyp-34A5;cyp-34A10;cyp-33D1;cyp-33D3
gi|6681113|ref|NP_031844.1|	0.34	1	574	91	45	12	18	9	1	5	mitochondrial	cytochrome P450 3A11 [Mus musculus]	NP_031844	ENSMUSG00000056035	13112	Cyp3a11	nan	nan
gi|6681115|ref|NP_031845.1|	0.52	1	575	45	105	30	29	19	9	18	mitochondrial	cytochrome P450 3A13 [Mus musculus]	NP_031845	ENSMUSG00000029727	13113	Cyp3a13	nan	nan
gi|269784682|ref|NP_062766.2|	0.08	1	398	280	9	0	0	0	0	9	mitochondrial	cytochrome P450 3A25 [Mus musculus]	NP_062766	ENSMUSG00000029630	56388	Cyp3a25	nan	nan
gi|157364978|ref|NP_001098629.1|	0.2	1	164	91	21	5	8	3	1	4	mitochondrial	cytochrome P450 3A41 [Mus musculus]	NP_001098629	ENSMUSG00000075552	100041375	Cyp3a41b	nan	nan
gi|6681123|ref|NP_031849.1|	0.09	1	576	407	7	1	3	2	0	1	mitochondrial	cytochrome P450 4B1 [Mus musculus]	NP_031849	ENSMUSG00000028713	13120	Cyp4b1	WBGene00007140;WBGene00021412;WBGene00010354;WBGene00021200;WBGene00013381;WBGene00016147;WBGene00009226	cyp-29A4;cyp-29A3;cyp-31A2;cyp-31A3;cyp-31A5;cyp-32A1;cyp-37B1
gi|19527190|ref|NP_598730.1|	0.22	1	240	196	20	7	5	6	0	2	mitochondrial	cytochrome P450 4V3 [Mus musculus]	NP_598730	ENSMUSG00000079057	102294	Cyp4v3	WBGene00007140;WBGene00021412;WBGene00010354;WBGene00021200;WBGene00013381;WBGene00016147;WBGene00009226	cyp-29A4;cyp-29A3;cyp-31A2;cyp-31A3;cyp-31A5;cyp-32A1;cyp-37B1
gi|268607516|ref|NP_082467.2|	0.41	1	396	46	55	5	19	14	4	13	mitochondrial	cytochrome P450, family 2, subfamily c, polypeptide 65 [Mus musculus]	NP_082467	ENSMUSG00000067231	72303	Cyp2c65	WBGene00016092;WBGene00018334;WBGene00016768;WBGene00018333;WBGene00016860;WBGene00015709;WBGene00018261;WBGene00018264;WBGene00018413;WBGene00018262;WBGene00018260;WBGene00019967;WBGene00021710;WBGene00021168;WBGene00016697;WBGene00016686;WBGene00011698;WBGene00011699;WBGene00015400;WBGene00015399;WBGene00016786;WBGene00019565;WBGene00019473;WBGene00007362;WBGene00019471;WBGene00019470;WBGene000…	cyp-33B1;cyp-33E2;cyp-33E1;cyp-33E3;cyp-33C9;cyp-33A1;cyp-33C5;cyp-33C6;cyp-33C4;cyp-33C3;cyp-33C7;cyp-33C8;cyp-33C11;cyp-33C12;cyp-33C2;cyp-33C1;cyp-34A1;cyp-34A2;cyp-35A2;cyp-35A1;cyp-35A4;cyp-35A3;cyp-35A5;cyp-35C1;cyp-35B2;cyp-35B3;cyp-35B1;cyp-35D1;cyp-34A7;cyp-34A6;cyp-34A8;cyp-34A9;cyp-34A5;cyp-34A10;cyp-33D1;cyp-33D3
gi|58743310|ref|NP_001011707.1|	0.25	1	532	46	34	3	11	10	2	8	mitochondrial	cytochrome P450, family 2, subfamily c, polypeptide 66 [Mus musculus]	NP_001011707	ENSMUSG00000067229	69888	Cyp2c66	WBGene00016092;WBGene00018334;WBGene00016768;WBGene00018333;WBGene00016860;WBGene00015709;WBGene00018261;WBGene00018264;WBGene00018413;WBGene00018262;WBGene00018260;WBGene00019967;WBGene00021710;WBGene00021168;WBGene00016697;WBGene00016686;WBGene00011698;WBGene00011699;WBGene00015400;WBGene00015399;WBGene00016786;WBGene00019565;WBGene00019473;WBGene00007362;WBGene00019471;WBGene00019470;WBGene000…	cyp-33B1;cyp-33E2;cyp-33E1;cyp-33E3;cyp-33C9;cyp-33A1;cyp-33C5;cyp-33C6;cyp-33C4;cyp-33C3;cyp-33C7;cyp-33C8;cyp-33C11;cyp-33C12;cyp-33C2;cyp-33C1;cyp-34A1;cyp-34A2;cyp-35A2;cyp-35A1;cyp-35A4;cyp-35A3;cyp-35A5;cyp-35C1;cyp-35B2;cyp-35B3;cyp-35B1;cyp-35D1;cyp-34A7;cyp-34A6;cyp-34A8;cyp-34A9;cyp-34A5;cyp-34A10;cyp-33D1;cyp-33D3
gi|148747522|ref|NP_062797.3|	0.07	1	130	73	13	4	2	2	1	4	mitochondrial	cytochrome P450, family 2, subfamily d, polypeptide 22 [Mus musculus]	NP_062797	ENSMUSG00000061740	56448	Cyp2d22	WBGene00016092;WBGene00018334;WBGene00016768;WBGene00018333;WBGene00016860;WBGene00015709;WBGene00018261;WBGene00018264;WBGene00018413;WBGene00018262;WBGene00018260;WBGene00019967;WBGene00021710;WBGene00021168;WBGene00016697;WBGene00016686;WBGene00011698;WBGene00011699;WBGene00015400;WBGene00015399;WBGene00016786;WBGene00019565;WBGene00019473;WBGene00007362;WBGene00019471;WBGene00019470;WBGene000…	cyp-33B1;cyp-33E2;cyp-33E1;cyp-33E3;cyp-33C9;cyp-33A1;cyp-33C5;cyp-33C6;cyp-33C4;cyp-33C3;cyp-33C7;cyp-33C8;cyp-33C11;cyp-33C12;cyp-33C2;cyp-33C1;cyp-34A1;cyp-34A2;cyp-35A2;cyp-35A1;cyp-35A4;cyp-35A3;cyp-35A5;cyp-35C1;cyp-35B2;cyp-35B3;cyp-35B1;cyp-35D1;cyp-34A7;cyp-34A6;cyp-34A8;cyp-34A9;cyp-34A5;cyp-34A10;cyp-33D1;cyp-33D3
gi|254939516|ref|NP_001156944.1|	0.07	2	130	73	13	4	2	2	1	4	mitochondrial	cytochrome P450, family 2, subfamily d, polypeptide 22 [Mus musculus]	NP_001156944	ENSMUSG00000061740	56448	Cyp2d22	WBGene00016092;WBGene00018334;WBGene00016768;WBGene00018333;WBGene00016860;WBGene00015709;WBGene00018261;WBGene00018264;WBGene00018413;WBGene00018262;WBGene00018260;WBGene00019967;WBGene00021710;WBGene00021168;WBGene00016697;WBGene00016686;WBGene00011698;WBGene00011699;WBGene00015400;WBGene00015399;WBGene00016786;WBGene00019565;WBGene00019473;WBGene00007362;WBGene00019471;WBGene00019470;WBGene000…	cyp-33B1;cyp-33E2;cyp-33E1;cyp-33E3;cyp-33C9;cyp-33A1;cyp-33C5;cyp-33C6;cyp-33C4;cyp-33C3;cyp-33C7;cyp-33C8;cyp-33C11;cyp-33C12;cyp-33C2;cyp-33C1;cyp-34A1;cyp-34A2;cyp-35A2;cyp-35A1;cyp-35A4;cyp-35A3;cyp-35A5;cyp-35C1;cyp-35B2;cyp-35B3;cyp-35B1;cyp-35D1;cyp-34A7;cyp-34A6;cyp-34A8;cyp-34A9;cyp-34A5;cyp-34A10;cyp-33D1;cyp-33D3
gi|20373155|ref|NP_570952.1|	0.07	1	247	177	6	0	2	2	0	2	mitochondrial	cytochrome P450, family 4, subfamily f, polypeptide 13 [Mus musculus]	NP_570952	ENSMUSG00000024055	170716	Cyp4f13	WBGene00007140;WBGene00021412;WBGene00010354;WBGene00021200;WBGene00013381;WBGene00016147;WBGene00009226	cyp-29A4;cyp-29A3;cyp-31A2;cyp-31A3;cyp-31A5;cyp-32A1;cyp-37B1
gi|13277362|ref|NP_077762.1|	0.1	1	88	177	14	1	6	5	0	2	mitochondrial	cytochrome P450, family 4, subfamily f, polypeptide 16 [Mus musculus]	NP_077762	ENSMUSG00000048440	70101	Cyp4f16	WBGene00007140;WBGene00021412;WBGene00010354;WBGene00021200;WBGene00013381;WBGene00016147;WBGene00009226	cyp-29A4;cyp-29A3;cyp-31A2;cyp-31A3;cyp-31A5;cyp-32A1;cyp-37B1
gi|157384934|ref|NP_001095058.1|	0.06	1	165	177	5	0	3	1	0	1	mitochondrial	cytochrome P450, family 4, subfamily f, polypeptide 40 [Mus musculus]	NP_001095058	ENSMUSG00000090700	631304	Cyp4f40	WBGene00007140;WBGene00021412;WBGene00010354;WBGene00021200;WBGene00013381;WBGene00016147;WBGene00009226	cyp-29A4;cyp-29A3;cyp-31A2;cyp-31A3;cyp-31A5;cyp-32A1;cyp-37B1
gi|170014720|ref|NP_780386.3|	0.24	1	208	215	18	3	6	3	0	6	mitochondrial	D-beta-hydroxybutyrate dehydrogenase, mitochondrial precursor [Mus musculus]	NP_780386	ENSMUSG00000046598	71911	Bdh1	nan	nan
gi|31980844|ref|NP_081095.2|	0.51	1	463	135	37	6	6	11	8	6	mitochondrial	dehydrogenase/reductase SDR family member 1 [Mus musculus]	NP_081095	ENSMUSG00000002332	52585	Dhrs1	WBGene00019109;WBGene00000973	F59E11.2;dhs-9
gi|31982856|ref|NP_031887.2|	0.22	1	479	245	12	2	6	1	2	1	mitochondrial	dihydrolipoyl dehydrogenase, mitochondrial precursor [Mus musculus]	NP_031887	ENSMUSG00000020664	13382	Dld	WBGene00010794	dld-1
gi|257796245|ref|NP_663589.3|	0.08	1	389	461	6	0	5	1	0	0	mitochondrial	dihydrolipoyllysine-residue acetyltransferase component of pyruvate dehydrogenase complex, mitochondrial [Mus musculus]	NP_663589	ENSMUSG00000000168	235339	Dlat	WBGene00009082	dlat-1
gi|46195798|ref|NP_031864.2|	0.15	3	441	289	17	11	5	0	0	1	mitochondrial	dolichyl-diphosphooligosaccharide--protein glycosyltransferase 48 kDa subunit precursor [Mus musculus]	NP_031864	ENSMUSG00000028757	13200	Ddost	WBGene00011638	ostb-1
gi|282398108|ref|NP_598694.3|	0.38	1	412	96	38	16	10	6	1	5	mitochondrial	dolichyl-diphosphooligosaccharide--protein glycosyltransferase subunit 1 [Mus musculus]	NP_598694	ENSMUSG00000030062	103963	Rpn1	WBGene00020683	ribo-1
gi|34996495|ref|NP_062616.2|	0.21	1	495	206	26	10	4	6	2	4	mitochondrial	dolichyl-diphosphooligosaccharide--protein glycosyltransferase subunit 2 [Mus musculus]	NP_062616	ENSMUSG00000027642	20014	Rpn2	WBGene00019693	ostd-1
gi|148747128|ref|NP_032434.3|	0.09	1	128	310	8	4	0	1	2	1	mitochondrial	dolichyl-diphosphooligosaccharide--protein glycosyltransferase subunit STT3A [Mus musculus]	NP_032434	ENSMUSG00000032116	16430	Stt3a	nan	nan
gi|61651673|ref|NP_077184.2|	0.03	1	537	449	7	2	2	2	0	1	mitochondrial	dolichyl-diphosphooligosaccharide--protein glycosyltransferase subunit STT3B [Mus musculus]	NP_077184	ENSMUSG00000032437	68292	Stt3b	WBGene00020437	stt-3
gi|254588014|ref|NP_080070.2|	0.09	1	366	425	5	2	2	0	0	1	mitochondrial	electron transfer flavoprotein-ubiquinone oxidoreductase, mitochondrial precursor [Mus musculus]	NP_080070	ENSMUSG00000027809	66841	Etfdh	WBGene00002855	let-721
gi|254911131|ref|NP_001157185.1|	0.2	1	374	297	10	2	1	4	1	2	mitochondrial	elongation factor Tu, mitochondrial isoform [Mus musculus]	NP_001157185	ENSMUSG00000073838	233870	Tufm	WBGene00007000	tufm-1
gi|23956396|ref|NP_705820.1|	0.26	1	344	262	16	9	4	0	0	3	mitochondrial	erlin-2 [Mus musculus]	NP_705820	ENSMUSG00000031483	244373	Erlin2	WBGene00016592	erl-1
gi|6680027|ref|NP_032159.1|	0.37	1	565	84	35	3	25	4	0	3	mitochondrial	glutamate dehydrogenase 1, mitochondrial precursor [Mus musculus]	NP_032159	ENSMUSG00000021794	14661	Glud1	WBGene00014095	gdh-1
gi|224922803|ref|NP_034404.3|	0.28	1	301	77	47	19	7	9	4	8	mitochondrial	glycerol-3-phosphate dehydrogenase, mitochondrial precursor [Mus musculus]	NP_034404	ENSMUSG00000026827	14571	Gpd2	WBGene00012031;WBGene00013049	T25G3.4;Y50E8A.6
gi|23956104|ref|NP_067274.1|	0.15	1	340	468	5	0	3	0	0	2	mitochondrial	GTP:AMP phosphotransferase, mitochondrial [Mus musculus]	NP_067274	ENSMUSG00000024782	56248	Ak3	nan	nan
gi|13385998|ref|NP_080784.1|	0.04	1	104	23	11	4	3	2	1	1	mitochondrial	heat shock protein 75 kDa, mitochondrial precursor [Mus musculus]	NP_080784	ENSMUSG00000005981	68015	Trap1	WBGene00020110	hsp-75
gi|111038118|ref|NP_032238.2|	0.6	1	22	100	46	0	16	12	6	12	mitochondrial	hydroxyacyl-coenzyme A dehydrogenase, mitochondrial precursor [Mus musculus]	NP_032238	ENSMUSG00000027984	15107	Hadh	WBGene00001157;WBGene00001158	ech-8;ech-9
gi|18250284|ref|NP_083849.1|	0.15	1	216	298	10	0	6	3	0	1	mitochondrial	isocitrate dehydrogenase [NAD] subunit alpha, mitochondrial precursor [Mus musculus]	NP_083849	ENSMUSG00000032279	67834	Idh3a	WBGene00009664	idha-1
gi|9789997|ref|NP_062668.1|	0.15	1	657	219	15	7	3	2	0	3	mitochondrial	LETM1 and EF-hand domain-containing protein 1, mitochondrial precursor [Mus musculus]	NP_062668	ENSMUSG00000005299	56384	Letm1	WBGene00010279	letm-1
gi|31982520|ref|NP_031407.2|	0.15	1	477	355	7	0	6	0	0	1	mitochondrial	long-chain specific acyl-CoA dehydrogenase, mitochondrial precursor [Mus musculus]	NP_031407	ENSMUSG00000026003	11363	Acadl	WBGene00015894;WBGene00016943;WBGene00008566;WBGene00008567;WBGene00008565;WBGene00008564;WBGene00019406;WBGene00020366	acdh-2;acdh-1;acox-1.3;acox-1.4;acox-1.2;acox-1.1;acdh-8;acdh-10
gi|31982186|ref|NP_032643.2|	0.64	1	473	67	72	1	54	9	2	6	mitochondrial	malate dehydrogenase, mitochondrial precursor [Mus musculus]	NP_032643	ENSMUSG00000019179	17448	Mdh2	WBGene00003162	mdh-2
gi|31981340|ref|NP_036030.2|	0.08	1	467	502	5	0	3	2	0	0	mitochondrial	mannose-P-dolichol utilization defect 1 protein [Mus musculus]	NP_036030	ENSMUSG00000018761	24070	Mpdu1	WBGene00018181	mpdu-1
gi|21312994|ref|NP_077173.1|	0.22	1	260	344	8	4	1	0	0	3	mitochondrial	mitochondrial 2-oxoglutarate/malate carrier protein [Mus musculus]	NP_077173	ENSMUSG00000014606	67863	Slc25a11	WBGene00015186	misc-1
gi|9790055|ref|NP_062732.1|	0.3	1	658	227	32	5	14	6	3	4	mitochondrial	mitochondrial carrier homolog 2 [Mus musculus]	NP_062732	ENSMUSG00000027282	56428	Mtch2	WBGene00018395;WBGene00018397;nan	mtch-1;F43E2.11;nan
gi|9790055|ref|NP_062732.1|	0.3	1	658	227	32	5	14	6	3	4	mitochondrial	mitochondrial carrier homolog 2 [Mus musculus]	NP_062732	ENSMUSG00000111714	56428	Mtch2	WBGene00018395;WBGene00018397;nan	mtch-1;F43E2.11;nan
gi|254826790|ref|NP_038798.2|	0.19	1	372	339	9	2	5	0	1	1	mitochondrial	mitochondrial dicarboxylate carrier [Mus musculus]	NP_038798	ENSMUSG00000025792	27376	Slc25a10	WBGene00019656	slc-25A10
gi|70608131|ref|NP_083949.2|	0.25	1	613	106	30	7	6	6	5	6	mitochondrial	mitochondrial inner membrane protein [Mus musculus]	NP_083949	ENSMUSG00000052337	76614	Immt	WBGene00012315	immt-2
gi|19526848|ref|NP_598445.1|	0.44	1	235	102	45	14	12	8	3	8	mitochondrial	MOSC domain-containing protein 2, mitochondrial precursor [Mus musculus]	NP_598445	ENSMUSG00000073481	67247	Marc2	WBGene00018758;WBGene00009049	F53E10.1;F22B8.7
gi|21703972|ref|NP_663469.1|	0.24	1	284	250	10	0	8	1	0	1	mitochondrial	NAD-dependent malic enzyme, mitochondrial precursor [Mus musculus]	NP_663469	ENSMUSG00000024556	107029	Me2	WBGene00012983	men-1
gi|12963633|ref|NP_075801.1|	0.33	1	83	335	10	3	4	2	0	1	mitochondrial	NADH dehydrogenase [ubiquinone] 1 alpha subcomplex subunit 13 [Mus musculus]	NP_075801	ENSMUSG00000036199	67184	Ndufa13	WBGene00016393	C34B2.8
gi|33563266|ref|NP_035016.1|	0.48	1	483	382	17	7	5	3	0	2	mitochondrial	NADH dehydrogenase [ubiquinone] 1 alpha subcomplex subunit 4 [Mus musculus]	NP_035016	ENSMUSG00000029632	17992	Ndufa4	nan	nan
gi|21312012|ref|NP_080979.1|	0.33	1	253	420	6	1	2	1	1	1	mitochondrial	NADH dehydrogenase [ubiquinone] 1 alpha subcomplex subunit 8 [Mus musculus]	NP_080979	ENSMUSG00000026895	68375	Ndufa8	WBGene00021849	Y54F10AM.5
gi|254692859|ref|NP_079634.2|	0.35	1	371	8	21	2	3	4	6	6	mitochondrial	NADH dehydrogenase [ubiquinone] 1 alpha subcomplex subunit 9, mitochondrial precursor [Mus musculus]	NP_079634	ENSMUSG00000000399	66108	Ndufa9	WBGene00021800	Y53G8AL.2
gi|58037109|ref|NP_080960.1|	0.25	1	527	454	7	1	3	1	1	1	mitochondrial	NADH dehydrogenase [ubiquinone] 1 beta subcomplex subunit 10 [Mus musculus]	NP_080960	ENSMUSG00000040048	68342	Ndufb10	WBGene00010326	F59C6.5
gi|21314826|ref|NP_080886.1|	0.28	3	148	496	5	0	2	2	0	1	mitochondrial	NADH dehydrogenase [ubiquinone] 1 beta subcomplex subunit 4 [Mus musculus]	NP_080886	ENSMUSG00000022820	68194	Ndufb4	WBGene00012166	nuo-6
gi|21314826|ref|NP_080886.1|	0.28	3	148	496	5	0	2	2	0	1	mitochondrial	NADH dehydrogenase [ubiquinone] 1 beta subcomplex subunit 4 [Mus musculus]	NP_080886	ENSMUSG00000022820	100041273	Ndufb4	WBGene00012166	nuo-6
gi|21314826|ref|NP_080886.1|	0.28	3	148	496	5	0	2	2	0	1	mitochondrial	NADH dehydrogenase [ubiquinone] 1 beta subcomplex subunit 4 [Mus musculus]	NP_080886	ENSMUSG00000022820	100042503	Ndufb4	WBGene00012166	nuo-6
gi|19526814|ref|NP_598427.1|	0.12	1	234	352	7	1	1	2	2	1	mitochondrial	NADH dehydrogenase [ubiquinone] flavoprotein 1, mitochondrial precursor [Mus musculus]	NP_598427	ENSMUSG00000037916	17995	Ndufv1	WBGene00003831	nuo-1
gi|23346461|ref|NP_694704.1|	0.15	1	331	338	10	3	1	1	4	1	mitochondrial	NADH dehydrogenase [ubiquinone] iron-sulfur protein 2, mitochondrial precursor [Mus musculus]	NP_694704	ENSMUSG00000013593	226646	Ndufs2	WBGene00006463;WBGene00001520	nduf-2.2;gas-1
gi|58037117|ref|NP_080964.1|	0.3	1	528	258	22	8	3	8	1	2	mitochondrial	NADH dehydrogenase [ubiquinone] iron-sulfur protein 3, mitochondrial precursor [Mus musculus]	NP_080964	ENSMUSG00000005510	68349	Ndufs3	WBGene00020417;nan	nuo-2;nan
gi|58037117|ref|NP_080964.1|	0.3	1	528	258	22	8	3	8	1	2	mitochondrial	NADH dehydrogenase [ubiquinone] iron-sulfur protein 3, mitochondrial precursor [Mus musculus]	NP_080964	ENSMUSG00000111727	68349	Ndufs3	WBGene00020417;nan	nuo-2;nan
gi|21312950|ref|NP_083548.1|	0.19	1	257	313	6	4	0	0	0	2	mitochondrial	NADH dehydrogenase [ubiquinone] iron-sulfur protein 7, mitochondrial precursor [Mus musculus]	NP_083548	ENSMUSG00000020153	75406	Ndufs7	WBGene00012376	nduf-7
gi|62198714|ref|YP_220550.1|	0.06	4	202	475	5	0	2	1	0	2	mitochondrial	NADH dehydrogenase subunit 1 [Mus musculus domesticus]	YP_220550				nan	nan
gi|19745150|ref|NP_084063.1|	0.6	1	243	87	84	16	29	18	7	14	mitochondrial	NADH-cytochrome b5 reductase 3 [Mus musculus]	NP_084063	ENSMUSG00000018042	109754	Cyb5r3	WBGene00020267;WBGene00020268	T05H4.4;hpo-19
gi|229892316|ref|NP_663493.2|	0.39	1	329	60	51	18	13	6	4	10	mitochondrial	NADH-ubiquinone oxidoreductase 75 kDa subunit, mitochondrial precursor [Mus musculus]	NP_663493	ENSMUSG00000025968	227197	Ndufs1	WBGene00021562	nuo-5
gi|6679421|ref|NP_032924.1|	0.35	1	557	112	39	9	13	11	3	3	mitochondrial	NADPH--cytochrome P450 reductase [Mus musculus]	NP_032924	ENSMUSG00000005514	18984	Por	WBGene00001262	emb-8
gi|8393866|ref|NP_058674.1|	0.4	1	636	118	26	0	24	0	2	0	mitochondrial	ornithine aminotransferase, mitochondrial precursor [Mus musculus]	NP_058674	ENSMUSG00000030934	18242	Oat	WBGene00015814	oatr-1
gi|6679184|ref|NP_032795.1|	0.17	1	553	370	6	0	5	0	0	1	mitochondrial	ornithine carbamoyltransferase, mitochondrial precursor [Mus musculus]	NP_032795	ENSMUSG00000031173	18416	Otc	nan	nan
gi|19526818|ref|NP_598429.1|	0.37	2	139	110	110	15	27	15	33	20	mitochondrial	phosphate carrier protein, mitochondrial precursor [Mus musculus]	NP_598429	ENSMUSG00000061904	18674	Slc25a3	nan	nan
gi|149253631|ref|XP_001478505.1|	0.49	1	136	315	32	6	7	6	1	12	mitochondrial	PREDICTED: ATP synthase subunit g, mitochondrial-like [Mus musculus]	XP_001478505				nan	nan
gi|149251053|ref|XP_001478145.1|	0.59	1	134	111	76	20	23	19	6	8	mitochondrial	PREDICTED: ATP synthase subunit O, mitochondrial-like [Mus musculus]	XP_001478145				nan	nan
gi|149263037|ref|XP_001475467.1|	0.36	2	28	398	9	2	6	0	0	1	mitochondrial	PREDICTED: cytochrome c oxidase subunit 5B, mitochondrial-like [Mus musculus]	XP_001475467				nan	nan
gi|149263103|ref|XP_001478266.1|	0.37	1	143	383	16	5	6	3	2	0	mitochondrial	PREDICTED: cytochrome c oxidase subunit 6C-like [Mus musculus]	XP_001478266				nan	nan
gi|309265149|ref|XP_003086447.1|	0.15	1	441	289	17	11	5	0	0	1	mitochondrial	PREDICTED: dolichyl-diphosphooligosaccharide--protein glycosyltransferase 48 kDa subunit-like [Mus musculus]	XP_003086447				nan	nan
gi|309263866|ref|XP_003086141.1|	0.25	2	284	250	10	0	8	1	0	1	mitochondrial	PREDICTED: NAD-dependent malic enzyme, mitochondrial-like [Mus musculus]	XP_003086141				nan	nan
gi|149266669|ref|XP_001476621.1|	0.28	1	148	496	5	0	2	2	0	1	mitochondrial	PREDICTED: NADH dehydrogenase [ubiquinone] 1 beta subcomplex subunit 4-like [Mus musculus]	XP_001476621				nan	nan
gi|149258501|ref|XP_001475977.1|	0.37	1	139	110	110	15	27	15	33	20	mitochondrial	PREDICTED: phosphate carrier protein, mitochondrial-like [Mus musculus]	XP_001475977				nan	nan
gi|126723336|ref|NP_031557.2|	0.51	1	81	124	55	27	8	6	3	11	mitochondrial	prohibitin-2 [Mus musculus]	NP_031557	ENSMUSG00000004264	12034	Phb2	WBGene00004015	phb-2
gi|162461907|ref|NP_034611.2|	0.1	1	193	354	7	1	5	0	0	1	mitochondrial	stress-70 protein, mitochondrial [Mus musculus]	NP_034611	ENSMUSG00000024359	15526	Hspa9	WBGene00002010	hsp-6
gi|54607098|ref|NP_075770.1|	0.32	1	523	101	45	10	20	5	4	6	mitochondrial	succinate dehydrogenase [ubiquinone] flavoprotein subunit, mitochondrial precursor [Mus musculus]	NP_075770	ENSMUSG00000021577	66945	Sdha	WBGene00015391;WBGene00016392	sdha-1;sdha-2
gi|34328286|ref|NP_075863.2|	0.16	1	491	429	5	3	2	0	0	0	mitochondrial	succinate dehydrogenase [ubiquinone] iron-sulfur subunit, mitochondrial precursor [Mus musculus]	NP_075863	ENSMUSG00000009863	67680	Sdhb	WBGene00009626	F42A8.1
gi|228008307|ref|NP_079597.2|	0.14	1	326	486	7	1	1	1	1	3	mitochondrial	succinate dehydrogenase cytochrome b560 subunit, mitochondrial precursor [Mus musculus]	NP_079597	ENSMUSG00000058076	66052	Sdhc	WBGene00003225	mev-1
gi|244790045|ref|NP_067482.4|	0.07	1	352	399	8	4	1	0	2	1	mitochondrial	sulfide:quinone oxidoreductase, mitochondrial precursor [Mus musculus]	NP_067482	ENSMUSG00000005803	59010	Sqor	WBGene00008538;WBGene00021183	sqrd-1;Y9C9A.16
gi|229892347|ref|NP_766431.3|	0.16	1	330	290	14	1	3	3	0	7	mitochondrial	torsin-1A-interacting protein 2 isoform b [Mus musculus]	NP_766431	ENSMUSG00000050565	240832	Tor1aip2	nan	nan
gi|33859811|ref|NP_849209.1|	0.48	1	489	41	126	33	41	24	11	17	mitochondrial	trifunctional enzyme subunit alpha, mitochondrial precursor [Mus musculus]	NP_849209	ENSMUSG00000025745	97212	Hadha	WBGene00001150;WBGene00020347	ech-1.1;ech-1.2
gi|21704100|ref|NP_663533.1|	0.26	1	287	148	24	10	8	3	0	3	mitochondrial	trifunctional enzyme subunit beta, mitochondrial precursor [Mus musculus]	NP_663533	ENSMUSG00000059447	231086	Hadhb	WBGene00015125	B0303.3
gi|23956084|ref|NP_059062.1|	0.24	1	339	151	20	7	4	4	1	4	mitochondrial	very long-chain specific acyl-CoA dehydrogenase, mitochondrial precursor [Mus musculus]	NP_059062	ENSMUSG00000018574	11370	Acadvl	WBGene00017125	acdh-12
gi|6755594|ref|NP_035561.1|	0.1	2	171	286	7	6	0	0	1	0	nuclear	116 kDa U5 small nuclear ribonucleoprotein component [Mus musculus]	NP_035561	ENSMUSG00000020929	20624	Eftud2	WBGene00001166	eftu-2
gi|61743961|ref|NP_033773.1|	0.04	1	538	155	22	1	4	9	6	2	nuclear	AHNAK nucleoprotein isoform 1 [Mus musculus]	NP_033773	ENSMUSG00000069833	66395	Ahnak	nan	nan
gi|224967104|ref|NP_080775.3|	0.09	1	302	340	7	7	0	0	0	0	nuclear	arginine/serine-rich splicing factor 6 [Mus musculus]	NP_080775	ENSMUSG00000016921	67996	Srsf6	nan	nan
gi|150456419|ref|NP_031868.2|	0.05	1	151	353	7	2	0	1	0	4	nuclear	ATP-dependent RNA helicase A [Mus musculus]	NP_031868	ENSMUSG00000042699	13211	Dhx9	WBGene00004355	rha-1
gi|41152517|ref|NP_036145.1|	0.16	4	416	401	8	0	3	2	1	2	nuclear	core histone macro-H2A.1 isoform 1 [Mus musculus]	NP_036145	ENSMUSG00000015937	26914	H2afy	nan	nan
gi|160420310|ref|NP_001091448.2|	0.47	2	181	131	245	44	53	56	48	44	nuclear	H2b histone family, member A [Mus musculus]	NP_001091448	ENSMUSG00000069307	665596	Hist1h2bq	nan	nan
gi|19527048|ref|NP_598595.1|	0.13	1	237	458	6	6	0	0	0	0	nuclear	heterogeneous nuclear ribonucleoprotein F [Mus musculus]	NP_598595	ENSMUSG00000042079	98758	Hnrnpf	WBGene00013703;WBGene00022253;WBGene00006367	rbm-12;hrpf-2;sym-2
gi|13384620|ref|NP_079555.1|	0.1	1	92	471	5	3	0	0	0	2	nuclear	heterogeneous nuclear ribonucleoprotein K [Mus musculus]	NP_079555	ENSMUSG00000021546	15387	Hnrnpk	WBGene00017816	hrpk-1
gi|160333923|ref|NP_058085.2|	0.08	1	179	332	10	8	1	0	0	1	nuclear	heterogeneous nuclear ribonucleoprotein U [Mus musculus]	NP_058085	ENSMUSG00000039630	51810	Hnrnpu	nan	nan
gi|160333923|ref|NP_058085.2|	0.08	1	179	332	10	8	1	0	0	1	nuclear	heterogeneous nuclear ribonucleoprotein U [Mus musculus]	NP_058085	ENSMUSG00000111145	51810	Hnrnpu	nan	nan
gi|28316756|ref|NP_783589.1|	0.36	1	414	109	208	31	51	46	43	37	nuclear	histone cluster 1, H2aa [Mus musculus]	NP_783589	ENSMUSG00000060081	319163	Hist1h2aa	nan	nan
gi|31560697|ref|NP_032223.2|	0.16	1	456	453	7	3	2	2	0	0	nuclear	histone H1.0 [Mus musculus]	NP_032223	ENSMUSG00000096210	14958	H1f0	WBGene00001855;WBGene00001856;WBGene00001857;WBGene00001853;WBGene00001854	hil-4;hil-5;hil-6;hil-2;hil-3
gi|21426823|ref|NP_085112.1|	0.19	1	270	86	30	8	4	5	7	6	nuclear	histone H1.1 [Mus musculus]	NP_085112	ENSMUSG00000049539	80838	Hist1h1a	WBGene00001855;WBGene00001856;WBGene00001857;WBGene00001853;WBGene00001854	hil-4;hil-5;hil-6;hil-2;hil-3
gi|294712564|ref|NP_001171015.1|	0.35	3	414	109	208	31	51	46	43	37	nuclear	histone H2A type 1 [Mus musculus]	NP_001171015	ENSMUSG00000094248	665433	Hist1h2ao	nan	nan
gi|28316750|ref|NP_783594.1|	0.42	1	413	131	69	7	14	15	15	18	nuclear	histone H2B type 1-A [Mus musculus]	NP_783594	ENSMUSG00000050799	319177	Hist1h2ba	WBGene00001896;WBGene00001940;WBGene00001903;WBGene00001918;WBGene00001915;WBGene00001878;WBGene00001936;WBGene00001932;WBGene00001928;WBGene00001882;WBGene00001885;WBGene00001894;WBGene00001913;WBGene00001922;WBGene00001889;WBGene00001908;WBGene00001926	his-22;his-66;his-29;his-44;his-41;his-4;his-62;his-58;his-54;his-8;his-11;his-20;his-39;his-48;his-15;his-34;his-52
gi|28316760|ref|NP_783595.1|	0.5	4	181	131	245	44	53	56	48	44	nuclear	histone H2B type 1-B [Mus musculus]	NP_783595	ENSMUSG00000075031	319178	Hist1h2bb	nan	nan
gi|21489955|ref|NP_659539.1|	0.48	1	278	122	83	25	13	16	22	7	nuclear	histone H3.1 [Mus musculus]	NP_659539	ENSMUSG00000099517	97908	Hist1h3g	WBGene00001887;WBGene00001933;WBGene00001883;WBGene00001891;WBGene00001923;WBGene00001899;WBGene00001901;WBGene00001916;WBGene00001929;WBGene00001876;WBGene00001937;WBGene00001919;WBGene00001914;WBGene00001906;WBGene00001880	his-13;his-59;his-9;his-17;his-49;his-25;his-27;his-42;his-55;his-2;his-63;his-45;his-40;his-32;his-6
gi|30061401|ref|NP_835734.1|	0.44	1	428	122	102	25	16	16	31	14	nuclear	histone H3.2 [Mus musculus]	NP_835734	ENSMUSG00000093769	15077	Hist2h3c1	nan	nan
gi|6680159|ref|NP_032236.1|	0.48	3	439	122	87	25	14	16	24	8	nuclear	histone H3.3 [Mus musculus]	NP_032236	ENSMUSG00000060743	15078	H3f3a	WBGene00012276;WBGene00001944;WBGene00001943	his-74;his-70;his-69
gi|6680161|ref|NP_032237.1|	0.48	4	439	122	87	25	14	16	24	8	nuclear	histone H3.3 [Mus musculus]	NP_032237	ENSMUSG00000016559	15081	H3f3b	WBGene00012276;WBGene00001944;WBGene00001943	his-74;his-70;his-69
gi|21361209|ref|NP_291074.1|	0.63	1	268	108	349	89	79	73	58	50	nuclear	histone H4 [Mus musculus]	NP_291074	ENSMUSG00000091405	97122	Hist2h4	nan	nan
gi|55769578|ref|NP_766284.2|	0.06	1	524	282	8	0	3	2	3	0	nuclear	inaD-like protein isoform 1 [Mus musculus]	NP_766284	ENSMUSG00000061859	12695	Patj	WBGene00021406;WBGene00001492;WBGene00003404	frm-5.2;frm-5.1;mpz-1
gi|229608895|ref|NP_598576.2|	0.09	1	327	400	8	4	2	2	0	0	nuclear	lamin-B receptor [Mus musculus]	NP_598576	ENSMUSG00000004880	98386	Lbr	WBGene00007126	dhcr-7
gi|188219589|ref|NP_034851.2|	0.1	1	223	140	6	0	1	3	0	2	nuclear	lamin-B1 [Mus musculus]	NP_034851	ENSMUSG00000024590	16906	Lmnb1	nan	nan
gi|124487155|ref|NP_001074640.1|	0.04	1	66	165	19	1	0	7	5	6	nuclear	laminin subunit alpha-5 precursor [Mus musculus]	NP_001074640	ENSMUSG00000015647	16776	Lama5	nan	nan
gi|114326497|ref|NP_032508.2|	0.06	1	37	275	10	0	0	7	0	3	nuclear	laminin subunit beta-1 [Mus musculus]	NP_032508	ENSMUSG00000002900	16777	Lamb1	nan	nan
gi|153791270|ref|NP_034813.2|	0.09	1	153	156	17	1	2	12	0	2	nuclear	laminin subunit gamma-1 precursor [Mus musculus]	NP_034813	ENSMUSG00000026478	226519	Lamc1	nan	nan
gi|239052674|ref|NP_542369.2|	0.04	1	335	498	5	0	1	1	0	3	nuclear	major vault protein [Mus musculus]	NP_542369	ENSMUSG00000030681	78388	Mvp	nan	nan
gi|6754994|ref|NP_035995.1|	0.12	1	598	357	5	5	0	0	0	0	nuclear	poly(rC)-binding protein 1 [Mus musculus]	NP_035995	ENSMUSG00000051695	23983	Pcbp1	WBGene00010908;WBGene00003978;WBGene00016489;WBGene00019692;WBGene00013347;WBGene00007534	imph-1;pes-4;fubl-3;fubl-4;nova-1;fubl-1
gi|157041229|ref|NP_001096635.1|	0.15	1	160	357	6	6	0	0	0	0	nuclear	poly(rC)-binding protein 2 isoform 1 [Mus musculus]	NP_001096635	ENSMUSG00000056851	18521	Pcbp2	WBGene00010908;WBGene00003978;WBGene00016489;WBGene00019692;WBGene00013347	imph-1;pes-4;fubl-3;fubl-4;nova-1
gi|160420312|ref|NP_001104025.1|	0.47	3	181	131	245	44	53	56	48	44	nuclear	predicted gene 11277 [Mus musculus]	NP_001104025	ENSMUSG00000069303	665622	Hist1h2br	nan	nan
gi|309264552|ref|XP_003086287.1|	0.48	1	439	122	87	25	14	16	24	8	nuclear	PREDICTED: histone H3.3-like [Mus musculus]	XP_003086287				nan	nan
gi|82934691|ref|XP_895812.1|	0.18	1	630	122	14	4	1	6	3	0	nuclear	PREDICTED: histone H3.3-like [Mus musculus]	XP_895812				nan	nan
gi|94395561|ref|XP_995553.1|	0.48	6	439	122	87	25	14	16	24	8	nuclear	PREDICTED: histone H3.3-like isoform 1 [Mus musculus]	XP_995553				nan	nan
gi|309265743|ref|XP_981474.2|	0.63	13	268	108	349	89	79	73	58	50	nuclear	PREDICTED: histone H4-like [Mus musculus]	XP_981474				nan	nan
gi|309265106|ref|XP_003086424.1|	0.13	4	51	340	5	5	0	0	0	0	nuclear	PREDICTED: serine/arginine-rich splicing factor 5-like [Mus musculus]	XP_003086424				nan	nan
gi|162287370|ref|NP_001002011.2|	0.16	2	189	140	16	1	4	7	0	4	nuclear	prelamin-A/C [Mus musculus]	NP_001002011	ENSMUSG00000028063	16905	Lmna	nan	nan
gi|40068493|ref|NP_951062.1|	0.06	1	501	172	5	5	0	0	0	0	nuclear	probable ATP-dependent RNA helicase [Mus musculus]	NP_951062	ENSMUSG00000055065	67040	Ddx17	WBGene00010260	ddx-17
gi|14861844|ref|NP_149068.1|	0.12	1	126	172	8	7	0	1	0	0	nuclear	putative ATP-dependent RNA helicase Pl10 [Mus musculus]	NP_149068	ENSMUSG00000039224	110957	D1Pas1	nan	nan
gi|110835726|ref|NP_001036085.1|	0.04	2	21	466	5	5	0	0	0	0	nuclear	putative pre-mRNA-splicing factor ATP-dependent RNA helicase DHX15 [Mus musculus]	NP_001036085	ENSMUSG00000029169	13204	Dhx15	WBGene00018967	ddx-15
gi|34328400|ref|NP_775550.2|	0.35	1	492	243	13	13	0	0	0	0	nuclear	serine/arginine-rich splicing factor 1 isoform 1 [Mus musculus]	NP_775550	ENSMUSG00000018379	110809	Srsf1	nan	nan
gi|34328400|ref|NP_775550.2|	0.35	1	492	243	13	13	0	0	0	0	nuclear	serine/arginine-rich splicing factor 1 isoform 1 [Mus musculus]	NP_775550	ENSMUSG00000098301	110809	Srsf1	nan	nan
gi|122937372|ref|NP_001073856.1|	0.18	1	59	361	7	6	0	1	0	0	nuclear	serine/arginine-rich splicing factor 10 isoform 2 [Mus musculus]	NP_001073856	ENSMUSG00000028676	14105	Srsf10	nan	nan
gi|8567402|ref|NP_038691.1|	0.29	1	642	459	6	6	0	0	0	0	nuclear	serine/arginine-rich splicing factor 3 [Mus musculus]	NP_038691	ENSMUSG00000071172	20383	Srsf3	nan	nan
gi|119226243|ref|NP_001073162.1|	0.13	1	51	340	5	5	0	0	0	0	nuclear	serine/arginine-rich splicing factor 5 [Mus musculus]	NP_001073162	ENSMUSG00000021134	20384	Srsf5	nan	nan
gi|6755698|ref|NP_035642.1|	0.22	1	606	203	35	10	10	9	3	3	nuclear	surfeit locus protein 4 [Mus musculus]	NP_035642	ENSMUSG00000014867	20932	Surf4	WBGene00004788	sft-4
gi|40018610|ref|NP_796188.2|	0.02	1	500	427	5	5	0	0	0	0	nuclear	U5 small nuclear ribonucleoprotein 200 kDa helicase [Mus musculus]	NP_796188	ENSMUSG00000003660	320632	Snrnp200	nan	nan
gi|6678924|ref|NP_032647.1|	0.36	1	552	152	19	6	7	4	1	1	signaling	55 kDa erythrocyte membrane protein, EMP55 [Mus musculus]	NP_032647	ENSMUSG00000031402	17524	Mpp1	WBGene00021914;WBGene00016841;WBGene00002991	magu-1;magu-3;lin-2
gi|134288869|ref|NP_033893.2|	0.22	1	110	317	18	1	5	5	1	6	signaling	ADP-ribosyl cyclase 2 [Mus musculus]	NP_033893	ENSMUSG00000029082	12182	Bst1	nan	nan
gi|194353962|ref|NP_001123880.1|	0.35	1	232	229	23	7	5	5	0	6	signaling	ADP-ribosylation factor 1 [Mus musculus]	NP_001123880	ENSMUSG00000048076	11840	Arf1	WBGene00000182	arf-1.2
gi|22550094|ref|NP_032950.1|	0.19	1	304	372	5	0	1	1	1	2	signaling	cAMP-dependent protein kinase type II-alpha regulatory subunit [Mus musculus]	NP_032950	ENSMUSG00000032601	19087	Prkar2a	nan	nan
gi|22165382|ref|NP_666199.1|	0.03	1	295	494	5	0	0	0	3	2	signaling	casein kinase I isoform alpha [Mus musculus]	NP_666199	ENSMUSG00000024576	93687	Csnk1a1	WBGene00002202	kin-19
gi|30520139|ref|NP_848830.1|	0.11	1	434	456	6	3	0	0	1	2	signaling	cell cycle control protein 50B [Mus musculus]	NP_848830	ENSMUSG00000034435	238257	Tmem30b	WBGene00012224;WBGene00008969;WBGene00019946	W03G11.2;F20C5.4;chat-1
gi|6753364|ref|NP_033991.1|	0.37	1	586	99	28	9	11	4	2	2	signaling	cell division control protein 42 homolog precursor [Mus musculus]	NP_033991	ENSMUSG00000006699	12540	Cdc42	WBGene00000390	cdc-42
gi|188219585|ref|NP_032952.3|	0.14	1	222	246	11	1	3	5	0	2	signaling	cGMP-dependent protein kinase 2 [Mus musculus]	NP_032952	ENSMUSG00000029334	19092	Prkg2	nan	nan
gi|41054806|ref|NP_032164.2|	0.22	1	505	34	19	7	5	3	2	2	signaling	guanine nucleotide-binding protein G(i) subunit alpha-2 [Mus musculus]	NP_032164	ENSMUSG00000032562	14678	Gnai2	WBGene00001671;WBGene00001670;WBGene00001664;WBGene00001675;WBGene00001665;WBGene00001673;WBGene00001668;WBGene00001676;WBGene00001667;WBGene00001745	gpa-9;gpa-8;gpa-2;gpa-13;gpa-3;gpa-11;gpa-6;gpa-14;gpa-5;gsa-1
gi|13384618|ref|NP_079554.1|	0.76	1	91	254	30	7	8	8	3	4	signaling	guanine nucleotide-binding protein G(I)/G(S)/G(O) subunit gamma-12 [Mus musculus]	NP_079554	ENSMUSG00000036402	14701	Gng12	nan	nan
gi|229608938|ref|NP_001153488.1|	0.45	1	328	78	153	34	26	26	29	38	signaling	guanine nucleotide-binding protein G(I)/G(S)/G(T) subunit beta-1 [Mus musculus]	NP_001153488	ENSMUSG00000029064	14688	Gnb1	WBGene00001679	gpb-1
gi|13937391|ref|NP_034442.1|	0.45	1	115	78	127	27	26	23	22	29	signaling	guanine nucleotide-binding protein G(I)/G(S)/G(T) subunit beta-2 [Mus musculus]	NP_034442	ENSMUSG00000029713	14693	Gnb2	WBGene00001679	gpb-1
gi|33563256|ref|NP_034436.1|	0.15	1	482	34	15	7	4	2	2	0	signaling	guanine nucleotide-binding protein G(k) subunit alpha [Mus musculus]	NP_034436	ENSMUSG00000000001	14679	Gnai3	WBGene00001671;WBGene00001670;WBGene00001664;WBGene00001675;WBGene00001665;WBGene00001673;WBGene00001668;WBGene00001676;WBGene00001667;WBGene00001745	gpa-9;gpa-8;gpa-2;gpa-13;gpa-3;gpa-11;gpa-6;gpa-14;gpa-5;gsa-1
gi|84662745|ref|NP_032165.3|	0.31	1	639	34	42	14	12	11	2	3	signaling	guanine nucleotide-binding protein G(q) subunit alpha [Mus musculus]	NP_032165	ENSMUSG00000024639	14682	Gnaq	WBGene00001196	egl-30
gi|6754004|ref|NP_034431.1|	0.54	1	593	34	138	34	30	30	21	23	signaling	guanine nucleotide-binding protein subunit alpha-11 [Mus musculus]	NP_034431	ENSMUSG00000034781	14672	Gna11	WBGene00001671;WBGene00001670;WBGene00001664;WBGene00001675;WBGene00001665;WBGene00001673;WBGene00001668;WBGene00001676;WBGene00001667;WBGene00001745	gpa-9;gpa-8;gpa-2;gpa-13;gpa-3;gpa-11;gpa-6;gpa-14;gpa-5;gsa-1
gi|89001109|ref|NP_034433.3|	0.17	1	650	34	31	7	10	7	3	4	signaling	guanine nucleotide-binding protein subunit alpha-13 [Mus musculus]	NP_034433	ENSMUSG00000020611	14674	Gna13	WBGene00001671;WBGene00001670;WBGene00001664;WBGene00001675;WBGene00001665;WBGene00001678;WBGene00001666;WBGene00001674;WBGene00001673;WBGene00001668;WBGene00001676;WBGene00001667;WBGene00001745	gpa-9;gpa-8;gpa-2;gpa-13;gpa-3;gpa-16;gpa-4;gpa-12;gpa-11;gpa-6;gpa-14;gpa-5;gsa-1
gi|61102728|ref|NP_542120.2|	0.04	1	536	312	7	2	2	0	0	3	signaling	inositol 1,4,5-trisphosphate receptor type 3 [Mus musculus]	NP_542120	ENSMUSG00000042644	16440	Itpr3	WBGene00006801	unc-68
gi|31980806|ref|NP_058063.2|	0.29	1	460	217	15	2	5	4	2	2	signaling	membrane-associated progesterone receptor component 1 [Mus musculus]	NP_058063	ENSMUSG00000006373	53328	Pgrmc1	WBGene00006890	vem-1
gi|226442772|ref|NP_081834.1|	0.22	1	313	476	5	0	2	3	0	0	signaling	membrane-associated progesterone receptor component 2 [Mus musculus]	NP_081834	ENSMUSG00000049940	70804	Pgrmc2	WBGene00006890	vem-1
gi|117647224|ref|NP_076018.2|	0.31	1	43	328	12	1	5	3	1	2	signaling	membrane-spanning 4-domains subfamily A member 10 [Mus musculus]	NP_076018	ENSMUSG00000024731	69826	Ms4a10	nan	nan
gi|309264540|ref|XP_003086306.1|	0.21	2	418	68	12	6	1	1	0	4	signaling	PREDICTED: ras-related protein Rab-5B [Mus musculus]	XP_003086306				nan	nan
gi|255683322|ref|NP_766413.2|	0.07	1	381	345	8	3	0	0	2	3	signaling	probable G-protein coupled receptor 128 precursor [Mus musculus]	NP_766413	ENSMUSG00000022755	239853	Adgrg7	nan	nan
gi|258547152|ref|NP_001158149.1|	0.07	1	390	346	8	1	0	1	0	6	signaling	programmed cell death 6-interacting protein [Mus musculus]	NP_001158149	ENSMUSG00000032504	18571	Pdcd6ip	nan	nan
gi|242332572|ref|NP_057930.2|	0.07	1	351	242	13	5	3	2	1	2	signaling	ras GTPase-activating-like protein IQGAP1 [Mus musculus]	NP_057930	ENSMUSG00000030536	29875	Iqgap1	WBGene00003980	pes-7
gi|118344444|ref|NP_081987.1|	0.07	1	49	284	7	1	0	1	1	4	signaling	ras GTPase-activating-like protein IQGAP2 [Mus musculus]	NP_081987	ENSMUSG00000021676	544963	Iqgap2	WBGene00003980	pes-7
gi|45592934|ref|NP_033033.1|	0.32	1	508	99	43	13	10	5	6	9	signaling	ras-related C3 botulinum toxin substrate 1 precursor [Mus musculus]	NP_033033	ENSMUSG00000001847	19353	Rac1	WBGene00004287	rac-2
gi|6677819|ref|NP_033127.1|	0.23	1	547	470	5	0	0	2	0	3	signaling	ras-related protein R-Ras precursor [Mus musculus]	NP_033127	ENSMUSG00000038387	20130	Rras	WBGene00004310	ras-1
gi|7710086|ref|NP_057885.1|	0.38	1	625	51	32	11	8	5	3	5	signaling	ras-related protein Rab-10 [Mus musculus]	NP_057885	ENSMUSG00000020671	19325	Rab10	nan	nan
gi|31980840|ref|NP_059078.2|	0.5	1	462	192	29	11	4	6	4	4	signaling	ras-related protein Rab-11A [Mus musculus]	NP_059078	ENSMUSG00000004771	53869	Rab11a	nan	nan
gi|6679583|ref|NP_033023.1|	0.46	1	560	192	27	11	5	6	1	4	signaling	ras-related protein Rab-11B [Mus musculus]	NP_033023	ENSMUSG00000077450	19326	Rab11b	WBGene00004274	rab-11.1
gi|21311975|ref|NP_080953.1|	0.12	1	252	51	14	3	6	2	2	1	signaling	ras-related protein Rab-13 [Mus musculus]	NP_080953	ENSMUSG00000027935	68328	Rab13	WBGene00019317	K02E10.1
gi|18390323|ref|NP_080973.1|	0.36	1	219	301	9	3	3	1	0	2	signaling	ras-related protein Rab-14 [Mus musculus]	NP_080973	ENSMUSG00000026878	68365	Rab14	WBGene00004276	rab-14
gi|6679587|ref|NP_033022.1|	0.55	1	561	51	34	10	10	4	8	2	signaling	ras-related protein Rab-1A [Mus musculus]	NP_033022	ENSMUSG00000020149	19324	Rab1a	nan	nan
gi|21313162|ref|NP_083852.1|	0.49	1	261	51	28	7	6	3	8	4	signaling	ras-related protein Rab-1B [Mus musculus]	NP_083852	ENSMUSG00000024870	76308	Rab1b	nan	nan
gi|10946940|ref|NP_067493.1|	0.38	1	13	266	15	5	5	4	1	0	signaling	ras-related protein Rab-2A [Mus musculus]	NP_067493	ENSMUSG00000047187	59021	Rab2a	WBGene00008671;WBGene00008672;WBGene00006833	F11A5.3;F11A5.4;unc-108
gi|37718983|ref|NP_937806.1|	0.11	1	498	51	14	3	5	3	2	1	signaling	ras-related protein Rab-35 [Mus musculus]	NP_937806	ENSMUSG00000029518	77407	Rab35	nan	nan
gi|13385374|ref|NP_080163.1|	0.3	1	99	68	10	3	1	2	0	4	signaling	ras-related protein Rab-5A [Mus musculus]	NP_080163	ENSMUSG00000017831	271457	Rab5a	nan	nan
gi|28916687|ref|NP_803130.1|	0.28	1	418	68	12	6	1	1	0	4	signaling	ras-related protein Rab-5B isoform 1 [Mus musculus]	NP_803130	ENSMUSG00000000711	19344	Rab5b	nan	nan
gi|113866024|ref|NP_077776.2|	0.59	1	31	68	19	7	1	5	2	4	signaling	ras-related protein Rab-5C [Mus musculus]	NP_077776	ENSMUSG00000019173	19345	Rab5c	WBGene00004268	rab-5
gi|254750706|ref|NP_001157135.1|	0.18	2	86	375	5	4	0	0	1	0	signaling	ras-related protein Rab-6A isoform 1 [Mus musculus]	NP_001157135	ENSMUSG00000030704	19346	Rab6a	WBGene00004269	rab-6.1
gi|13195674|ref|NP_077249.1|	0.18	1	86	375	5	4	0	0	1	0	signaling	ras-related protein Rab-6A isoform 2 [Mus musculus]	NP_077249	ENSMUSG00000030704	19346	Rab6a	WBGene00004269	rab-6.1
gi|148747526|ref|NP_033031.2|	0.39	1	131	269	13	10	0	0	1	2	signaling	ras-related protein Rab-7a [Mus musculus]	NP_033031	ENSMUSG00000079477	19349	Rab7	nan	nan
gi|38372905|ref|NP_075615.2|	0.4	1	499	51	27	7	8	6	2	4	signaling	ras-related protein Rab-8A [Mus musculus]	NP_075615	ENSMUSG00000003037	17274	Rab8a	nan	nan
gi|27734154|ref|NP_775589.1|	0.32	1	408	51	19	6	5	4	2	2	signaling	ras-related protein Rab-8B [Mus musculus]	NP_775589	ENSMUSG00000036943	235442	Rab8b	WBGene00004272	rab-8
gi|34328471|ref|NP_062364.3|	0.4	1	493	184	13	1	5	2	2	3	signaling	ras-related protein Ral-A precursor [Mus musculus]	NP_062364	ENSMUSG00000008859	56044	Rala	nan	nan
gi|11612509|ref|NP_071722.1|	0.37	1	41	184	14	2	3	1	2	6	signaling	ras-related protein Ral-B precursor [Mus musculus]	NP_071722	ENSMUSG00000004451	64143	Ralb	nan	nan
gi|21704066|ref|NP_663516.1|	0.31	1	286	233	19	4	8	6	1	0	signaling	ras-related protein Rap-1A precursor [Mus musculus]	NP_663516	ENSMUSG00000068798	109905	Rap1a	nan	nan
gi|33859753|ref|NP_077777.1|	0.31	1	488	233	18	4	7	6	1	0	signaling	ras-related protein Rap-1b precursor [Mus musculus]	NP_077777	ENSMUSG00000052681	215449	Rap1b	nan	nan
gi|21314830|ref|NP_647453.1|	0.19	1	267	440	9	3	0	2	2	2	signaling	receptor expression-enhancing protein 6 [Mus musculus]	NP_647453	ENSMUSG00000035504	70335	Reep6	WBGene00011401;WBGene00018930;WBGene00012180;WBGene00022127	T03F6.6;F56B3.6;W01D2.3;yop-1
gi|6680726|ref|NP_031509.1|	0.16	1	569	147	8	1	3	2	2	0	signaling	rho-related GTP-binding protein RhoB precursor [Mus musculus]	NP_031509	ENSMUSG00000054364	11852	Rhob	nan	nan
gi|160415213|ref|NP_031510.2|	0.34	1	180	147	22	3	5	3	7	4	signaling	rho-related GTP-binding protein RhoC precursor [Mus musculus]	NP_031510	ENSMUSG00000002233	11853	Rhoc	nan	nan
gi|9625037|ref|NP_062512.1|	0.36	1	655	99	11	3	3	2	1	2	signaling	rho-related GTP-binding protein RhoG precursor [Mus musculus]	NP_062512	ENSMUSG00000073982	56212	Rhog	WBGene00003239	mig-2
gi|227116298|ref|NP_001153016.1|	0.3	1	321	150	20	1	7	4	5	3	signaling	tyrosine-protein kinase FRK [Mus musculus]	NP_001153016	ENSMUSG00000019779	14302	Frk	nan	nan
gi|27370362|ref|NP_766479.1|	0.14	1	406	443	8	1	3	3	0	1	signaling	tyrosine-protein kinase STYK1 [Mus musculus]	NP_766479	ENSMUSG00000032899	243659	Styk1	WBGene00012632	Y38H6C.20
gi|88853578|ref|NP_031480.2|	0.08	1	649	210	10	4	1	2	1	2	trafficking	AP-1 complex subunit beta-1 [Mus musculus]	NP_031480	ENSMUSG00000009090	11764	Ap1b1	WBGene00000160	apb-1
gi|6671561|ref|NP_031484.1|	0.07	2	42	107	12	3	0	3	2	4	trafficking	AP-2 complex subunit alpha-1 [Mus musculus]	NP_031484	ENSMUSG00000060279	11771	Ap2a1	WBGene00000161	apa-2
gi|163644277|ref|NP_031485.3|	0.21	1	194	107	24	7	0	6	1	10	trafficking	AP-2 complex subunit alpha-2 [Mus musculus]	NP_031485	ENSMUSG00000002957	11772	Ap2a2	WBGene00000161	apa-2
gi|78711838|ref|NP_001030931.1|	0.12	2	265	210	15	6	3	2	2	2	trafficking	AP-2 complex subunit beta [Mus musculus]	NP_001030931	ENSMUSG00000035152	71770	Ap2b1	WBGene00000163	apb-3
gi|226823359|ref|NP_034068.3|	0.16	1	317	121	23	7	1	4	3	8	trafficking	coatomer subunit alpha [Mus musculus]	NP_034068	ENSMUSG00000026553	12847	Copa	WBGene00022119	copa-1
gi|15426055|ref|NP_203534.1|	0.04	1	158	409	7	5	0	1	0	1	trafficking	coatomer subunit beta [Mus musculus]	NP_203534	ENSMUSG00000030754	70349	Copb1	WBGene00021292	copb-1
gi|8567338|ref|NP_059505.1|	0.18	1	641	168	17	9	0	3	1	4	trafficking	coatomer subunit gamma isoform 1 [Mus musculus]	NP_059505	ENSMUSG00000030058	54161	Copg1	WBGene00011775	T14G10.5
gi|71061455|ref|NP_001021118.1|	0.05	1	614	480	5	0	0	0	1	4	trafficking	dynamin-1-like protein [Mus musculus]	NP_001021118	ENSMUSG00000022789	74006	Dnm1l	nan	nan
gi|149263967|ref|XP_001478849.1|	0.13	1	144	368	6	2	3	1	0	0	trafficking	PREDICTED: transmembrane emp24 domain-containing protein 10-like [Mus musculus]	XP_001478849				nan	nan
gi|117959930|ref|NP_963910.1|	0.08	3	47	34	12	5	4	1	2	0	trafficking	protein ALEX [Mus musculus]	NP_963910	ENSMUSG00000027523	14683	Gnas	WBGene00001671;WBGene00001670;WBGene00001664;WBGene00001675;WBGene00001665;WBGene00001678;WBGene00001666;WBGene00001674;WBGene00001673;WBGene00001668;WBGene00001676;WBGene00001667;WBGene00001745	gpa-9;gpa-8;gpa-2;gpa-13;gpa-3;gpa-16;gpa-4;gpa-12;gpa-11;gpa-6;gpa-14;gpa-5;gsa-1
gi|30519943|ref|NP_848729.1|	0.1	1	432	418	6	0	5	0	0	1	trafficking	sorting and assembly machinery component 50 homolog [Mus musculus]	NP_848729	ENSMUSG00000022437	68653	Samm50	WBGene00001662	gop-3
gi|33859662|ref|NP_036167.1|	0.28	1	487	176	25	9	1	6	7	2	trafficking	synaptic vesicle membrane protein VAT-1 homolog [Mus musculus]	NP_036167	ENSMUSG00000034993	26949	Vat1	WBGene00010791;WBGene00017060;WBGene00010790;WBGene00014096	sodh-2;D2063.1;sodh-1;ZK829.7
gi|295317325|ref|NP_001171263.1|	0.35	1	427	377	5	1	2	1	0	1	trafficking	synaptosomal-associated protein 23 [Mus musculus]	NP_001171263	ENSMUSG00000027287	20619	Snap23	nan	nan
gi|21312062|ref|NP_081051.1|	0.13	2	144	368	6	2	3	1	0	0	trafficking	transmembrane emp24 domain-containing protein 10 precursor [Mus musculus]	NP_081051	ENSMUSG00000021248	68581	Tmed10	WBGene00009829	F47G9.1
gi|31980629|ref|NP_058074.2|	0.22	1	458	501	5	0	2	2	0	1	trafficking	vesicle-associated membrane protein 8 [Mus musculus]	NP_058074	ENSMUSG00000050732	22320	Vamp8	WBGene00007200;nan	vamp-8;nan
gi|31980629|ref|NP_058074.2|	0.22	1	458	501	5	0	2	2	0	1	trafficking	vesicle-associated membrane protein 8 [Mus musculus]	NP_058074	ENSMUSG00000103205	22320	Vamp8	WBGene00007200;nan	vamp-8;nan
gi|94721328|ref|NP_038961.2|	0.29	1	653	205	26	7	5	4	0	10	trafficking	vesicle-associated membrane protein-associated protein A [Mus musculus]	NP_038961	ENSMUSG00000024091	30960	Vapa	WBGene00018008;WBGene00018354;WBGene00022546;WBGene00018840;WBGene00021428;WBGene00010254	vpr-1;F42G2.5;ZC196.2;F54H5.3;Y38F2AR.10;F58E6.5
gi|31543940|ref|NP_062780.2|	0.12	1	454	205	8	5	1	1	0	1	trafficking	vesicle-associated membrane protein-associated protein B [Mus musculus]	NP_062780	ENSMUSG00000054455	56491	Vapb	WBGene00018008;WBGene00018354;WBGene00022546;WBGene00018840;WBGene00021428;WBGene00010254	vpr-1;F42G2.5;ZC196.2;F54H5.3;Y38F2AR.10;F58E6.5
gi|6755448|ref|NP_035472.1|	0.26	1	604	366	6	2	1	2	0	1	trafficking	vesicle-trafficking protein SEC22b [Mus musculus]	NP_035472	ENSMUSG00000027879	20333	Sec22b	WBGene00018853	sec-22
gi|23943876|ref|NP_081194.1|	0.71	1	337	201	81	20	10	10	17	24	trafficking	zymogen granule membrane protein 16 precursor [Mus musculus]	NP_081194	ENSMUSG00000049350	69036	Zg16	nan	nan
gi|22165388|ref|NP_666261.1|	0.03	1	297	493	6	1	1	2	0	2	unknown	hypothetical protein LOC230579 [Mus musculus]	NP_666261	ENSMUSG00000034871	230579	Fam151a	WBGene00012184	mnr-1
gi|256985117|ref|NP_001157265.1|	0.05	1	387	426	5	0	1	0	1	3	unknown	hypothetical protein LOC320827 [Mus musculus]	NP_001157265	ENSMUSG00000036377	320827	C530008M17Rik	nan	nan
gi|307691256|ref|NP_001182694.1|	0.3	2	177	373	5	2	1	1	0	1	unknown	hypothetical protein LOC622534 [Mus musculus]	NP_001182694				nan	nan
gi|124486799|ref|NP_001074779.1|	0.28	1	64	202	50	7	14	18	4	7	unknown	hypothetical protein LOC625286 [Mus musculus]	NP_001074779	ENSMUSG00000061531	625286	Tmem236	nan	nan
gi|27754077|ref|NP_080609.2|	0.16	1	410	413	7	0	2	3	0	2	unknown	hypothetical protein LOC67715 isoform 2 [Mus musculus]	NP_080609	ENSMUSG00000025528	67715	2010106E10Rik	nan	nan
gi|27229101|ref|NP_081740.2|	0.39	1	401	158	32	14	9	4	2	3	unknown	hypothetical protein LOC70564 precursor [Mus musculus]	NP_081740	ENSMUSG00000021792	70564	Prxl2a	nan	nan
gi|253970410|ref|NP_653127.2|	0.18	1	358	451	7	6	0	1	0	0	unknown	hypothetical protein LOC78354 [Mus musculus]	NP_653127	ENSMUSG00000037145	78354	2210407C18Rik	nan	nan
gi|21313526|ref|NP_084494.1|	0.64	1	263	40	126	4	30	30	39	23	unknown	hypothetical protein LOC78906 [Mus musculus]	NP_084494	ENSMUSG00000035852	78906	Misp	nan	nan
gi|154759295|ref|NP_001094078.1|	0.24	2	85	441	8	2	1	0	2	3	unknown	predicted gene 15450 [Mus musculus]	NP_001094078				nan	nan

## Sheet: worms Int gene  and mouse BB
Wormbase ID	Gene name	Detected in mouse brush border (Mcconnell R E, et al. 2011)
WBGene00000003	aat-2	No
WBGene00000016	abf-5	No
WBGene00000022	abt-4	No
WBGene00000036	ace-2	Yes
WBGene00000040	aco-1	No
WBGene00000051	acr-12	No
WBGene00000062	acr-23	No
WBGene00000068	acy-1	No
WBGene00000070	acy-3	No
WBGene00000071	acy-4	No
WBGene00000072	add-1	No
WBGene00000074	adm-2	No
WBGene00000081	ads-1	No
WBGene00000082	adt-1	No
WBGene00000092	ags-3	No
WBGene00000096	ahr-1	No
WBGene00000106	alg-2	No
WBGene00000118	alh-12	No
WBGene00000136	amt-4	No
WBGene00000137	amx-1	Yes
WBGene00000145	apc-11	No
WBGene00000146	ape-1	No
WBGene00000148	aph-2	No
WBGene00000155	app-1	Yes
WBGene00000156	apr-1	No
WBGene00000157	aps-2	No
WBGene00000161	apa-2	Yes
WBGene00000163	apb-3	Yes
WBGene00000164	apm-3	No
WBGene00000165	aps-3	No
WBGene00000173	aqp-5	No
WBGene00000198	art-1	Yes
WBGene00000200	arx-2	Yes
WBGene00000204	arx-6	Yes
WBGene00000206	asb-1	Yes
WBGene00000210	asg-2	Yes
WBGene00000215	asp-2	No
WBGene00000217	asp-4	No
WBGene00000222	atf-6	No
WBGene00000227	atm-1	No
WBGene00000240	pah-1	No
WBGene00000247	bec-1	No
WBGene00000253	bli-3	No
WBGene00000259	bpl-1	No
WBGene00000269	bre-4	No
WBGene00000271	brf-1	No
WBGene00000281	cah-3	No
WBGene00000282	cah-4	No
WBGene00000283	cah-5	No
WBGene00000286	cal-2	No
WBGene00000288	cal-4	No
WBGene00000294	cas-1	Yes
WBGene00000302	cav-2	Yes
WBGene00000369	ccf-1	No
WBGene00000371	cco-1	No
WBGene00000387	cdc-25.2	No
WBGene00000393	cdf-1	No
WBGene00000395	cdh-3	Yes
WBGene00000401	cdh-9	Yes
WBGene00000402	cdh-10	No
WBGene00000409	cdk-8	No
WBGene00000410	cdk-9	No
WBGene00000431	ceh-6	No
WBGene00000448	pros-1	No
WBGene00000454	ceh-33	No
WBGene00000463	ceh-43	No
WBGene00000466	cel-1	No
WBGene00000480	cgp-1	No
WBGene00000481	cha-1	No
WBGene00000493	che-14	No
WBGene00000502	chp-1	No
WBGene00000508	cit-1.2	No
WBGene00000510	cka-2	No
WBGene00000517	cki-2	No
WBGene00000520	cku-80	No
WBGene00000522	clc-1	No
WBGene00000524	clc-3	No
WBGene00000532	clh-5	No
WBGene00000535	cpi-1	No
WBGene00000565	cnt-1	No
WBGene00000585	cogc-2	No
WBGene00000591	coh-1	No
WBGene00000601	col-12	No
WBGene00000616	col-39	No
WBGene00000653	col-77	No
WBGene00000667	col-92	No
WBGene00000668	col-93	No
WBGene00000669	col-94	No
WBGene00000675	col-101	No
WBGene00000692	col-118	No
WBGene00000704	col-130	No
WBGene00000719	col-146	No
WBGene00000723	col-150	No
WBGene00000726	col-153	No
WBGene00000728	col-155	No
WBGene00000733	col-160	No
WBGene00000749	col-176	No
WBGene00000766	coq-6	No
WBGene00000773	cpf-1	No
WBGene00000783	cpr-3	No
WBGene00000784	cpr-4	No
WBGene00000789	cpz-2	No
WBGene00000796	crn-3	No
WBGene00000814	csn-2	No
WBGene00000822	csq-1	No
WBGene00000834	cua-1	No
WBGene00000836	cul-1	No
WBGene00000840	cul-5	No
WBGene00000841	cul-6	No
WBGene00000862	cwp-4	No
WBGene00000865	cyb-1	No
WBGene00000869	cyc-1	Yes
WBGene00000896	dad-1	No
WBGene00000897	daf-1	No
WBGene00000923	daf-31	No
WBGene00000933	dap-3	No
WBGene00000936	dbl-1	No
WBGene00000961	dgn-1	No
WBGene00000963	dhp-1	No
WBGene00000966	dhs-2	No
WBGene00000967	dhs-3	No
WBGene00000968	dhs-4	No
WBGene00000970	dhs-6	Yes
WBGene00000973	dhs-9	Yes
WBGene00000975	dhs-12	Yes
WBGene00000984	dhs-21	No
WBGene00000985	dhs-22	No
WBGene00000987	dhs-24	No
WBGene00000993	dhs-30	Yes
WBGene00001021	dnj-3	No
WBGene00001036	dnj-18	No
WBGene00001045	dnj-27	No
WBGene00001052	dop-1	No
WBGene00001053	dop-2	No
WBGene00001055	dpf-2	No
WBGene00001056	dpf-3	No
WBGene00001057	dpf-4	No
WBGene00001086	dpy-27	No
WBGene00001093	drp-1	No
WBGene00001099	dsc-4	Yes
WBGene00001116	dyc-1	No
WBGene00001135	eat-4	No
WBGene00001155	ech-6	No
WBGene00001157	ech-8	Yes
WBGene00001174	egl-5	No
WBGene00001188	egl-20	No
WBGene00001190	egl-23	No
WBGene00001214	ego-1	No
WBGene00001228	eif-3.E	No
WBGene00001233	eif-3.K	No
WBGene00001234	eif-6	No
WBGene00001236	elc-1	No
WBGene00001239	elo-1	No
WBGene00001253	elt-6	No
WBGene00001309	emr-1	No
WBGene00001324	eor-1	No
WBGene00001325	eor-2	No
WBGene00001345	fos-1	No
WBGene00001368	exc-7	No
WBGene00001374	exp-2	No
WBGene00001390	far-6	No
WBGene00001396	fat-4	No
WBGene00001399	fat-7	No
WBGene00001405	fce-1	No
WBGene00001411	fem-1	No
WBGene00001425	fis-2	No
WBGene00001452	flp-9	No
WBGene00001463	flp-20	No
WBGene00001470	baz-2	No
WBGene00001476	fmo-1	Yes
WBGene00001492	frm-5.1	Yes
WBGene00001495	frm-9	No
WBGene00001505	fut-1	No
WBGene00001508	fut-8	No
WBGene00001514	xnd-1	No
WBGene00001515	gap-1	No
WBGene00001560	gei-3	No
WBGene00001566	acdh-13	No
WBGene00001577	gem-4	No
WBGene00001583	gfi-3	No
WBGene00001584	nrde-4	No
WBGene00001588	ggr-3	No
WBGene00001589	gip-1	No
WBGene00001595	gld-1	No
WBGene00001603	gln-2	No
WBGene00001622	glt-4	No
WBGene00001629	gly-4	No
WBGene00001636	gly-11	No
WBGene00001651	gon-2	Yes
WBGene00001661	gop-2	No
WBGene00001673	gpa-11	Yes
WBGene00001680	gpb-2	No
WBGene00001682	gpc-2	No
WBGene00001707	grh-1	No
WBGene00001713	grl-4	No
WBGene00001730	grl-21	No
WBGene00001744	gars-1	No
WBGene00001770	gst-22	No
WBGene00001795	gtl-1	No
WBGene00001803	lite-1	No
WBGene00001824	hbl-1	No
WBGene00001827	hcf-1	No
WBGene00001832	hcp-4	No
WBGene00001856	hil-5	Yes
WBGene00001879	his-5	No
WBGene00001892	his-18	No
WBGene00001977	hmg-12	No
WBGene00001987	hot-2	No
WBGene00001990	hot-5	No
WBGene00001993	hpd-1	No
WBGene00001996	hpl-2	No
WBGene00001997	hpr-9	No
WBGene00002001	hars-1	No
WBGene00002012	hsp-12.3	No
WBGene00002030	hst-3.1	No
WBGene00002041	hum-8	No
WBGene00002043	hyl-1	No
WBGene00002044	hyl-2	No
WBGene00002052	ifa-4	No
WBGene00002054	ifb-2	No
WBGene00002055	ifc-1	No
WBGene00002057	ifd-1	No
WBGene00002068	ify-1	No
WBGene00002069	ikb-1	No
WBGene00002071	ile-2	Yes
WBGene00002081	ina-1	No
WBGene00002110	ins-27	No
WBGene00002118	ins-35	No
WBGene00002129	inx-7	No
WBGene00002133	inx-11	No
WBGene00002136	inx-14	No
WBGene00002137	inx-15	No
WBGene00002139	inx-17	No
WBGene00002142	inx-20	No
WBGene00002146	ipp-5	No
WBGene00002147	ire-1	No
WBGene00002177	jkk-1	No
WBGene00002187	kgb-1	No
WBGene00002216	klp-3	No
WBGene00002220	gcc-1	No
WBGene00002224	klp-13	No
WBGene00002227	klp-17	No
WBGene00002234	kqt-2	No
WBGene00002241	kup-1	No
WBGene00002243	lad-2	No
WBGene00002245	lag-1	No
WBGene00002253	lbp-1	No
WBGene00002265	lec-2	No
WBGene00002267	lec-4	No
WBGene00002268	lec-5	No
WBGene00002273	lec-10	No
WBGene00002276	lem-3	No
WBGene00002299	let-23	No
WBGene00002393	lpr-1	No
WBGene00002497	let-268	No
WBGene00002694	let-502	No
WBGene00002827	let-653	No
WBGene00002879	let-754	No
WBGene00002891	let-767	No
WBGene00002977	lev-10	No
WBGene00002981	lgg-2	No
WBGene00002991	lin-2	Yes
WBGene00003006	lin-17	No
WBGene00003010	lin-24	No
WBGene00003014	lin-28	No
WBGene00003021	lin-36	No
WBGene00003022	lin-37	No
WBGene00003034	lin-49	No
WBGene00003056	lon-2	No
WBGene00003062	lpd-6	No
WBGene00003077	lsm-3	No
WBGene00003079	lsm-5	No
WBGene00003083	lst-1	No
WBGene00003124	mai-1	No
WBGene00003130	map-2	No
WBGene00003132	mat-1	No
WBGene00003134	mat-3	No
WBGene00003149	mbk-1	No
WBGene00003151	mca-1	No
WBGene00003160	mdf-1	No
WBGene00003164	mdt-6	No
WBGene00003165	mec-1	No
WBGene00003175	mec-12	No
WBGene00003178	mec-17	No
WBGene00003182	mef-2	No
WBGene00003234	mif-1	No
WBGene00003237	mif-4	No
WBGene00003258	cogc-1	No
WBGene00003375	mlp-1	No
WBGene00003405	mre-11	No
WBGene00003410	mrp-4	No
WBGene00003424	msp-3	No
WBGene00003432	msp-36	No
WBGene00003435	msp-40	No
WBGene00003442	msp-49	No
WBGene00003443	msp-50	No
WBGene00003446	msp-53	No
WBGene00003451	msp-58	No
WBGene00003452	msp-59	No
WBGene00003463	msp-76	No
WBGene00003465	msp-78	No
WBGene00003466	msp-79	No
WBGene00003467	msp-81	No
WBGene00003468	msp-113	No
WBGene00003470	msp-152	No
WBGene00003475	mtm-1	No
WBGene00003477	mtm-5	No
WBGene00003478	mtm-6	No
WBGene00003479	mtm-9	No
WBGene00003497	mup-4	No
WBGene00003508	mut-16	No
WBGene00003510	mxl-2	No
WBGene00003524	nas-5	No
WBGene00003533	nas-14	No
WBGene00003544	nas-25	No
WBGene00003586	ndx-9	No
WBGene00003590	nex-3	No
WBGene00003594	nft-1	No
WBGene00003601	nhr-2	No
WBGene00003607	nhr-8	No
WBGene00003613	nhr-14	No
WBGene00003618	nhr-19	No
WBGene00003625	nhr-31	No
WBGene00003626	nhr-32	No
WBGene00003634	nhr-44	No
WBGene00003635	nhr-45	No
WBGene00003656	nhr-66	No
WBGene00003659	nhr-69	No
WBGene00003685	nhr-95	No
WBGene00003691	nhr-101	No
WBGene00003693	nhr-103	No
WBGene00003699	nhr-109	No
WBGene00003720	nhr-130	No
WBGene00003723	nhr-133	No
WBGene00003725	nhr-135	No
WBGene00003730	nhx-2	Yes
WBGene00003733	nhx-5	Yes
WBGene00003739	nlp-1	No
WBGene00003751	nlp-13	No
WBGene00003752	nlp-14	No
WBGene00003755	nlp-17	No
WBGene00003758	nlp-20	No
WBGene00003765	nlp-27	No
WBGene00003778	nnt-1	No
WBGene00003790	npp-4	No
WBGene00003791	npp-5	No
WBGene00003796	npp-10	No
WBGene00003800	npp-14	No
WBGene00003802	npp-16	No
WBGene00003808	npr-2	No
WBGene00003821	nst-1	No
WBGene00003828	nuc-1	No
WBGene00003836	nxt-1	No
WBGene00003839	ocr-2	No
WBGene00003844	odc-1	No
WBGene00003847	blmp-1	No
WBGene00003870	ooc-5	No
WBGene00003877	pept-1	No
WBGene00003878	pept-3	No
WBGene00003919	par-4	No
WBGene00003923	pas-2	No
WBGene00003933	pat-9	No
WBGene00003943	pbo-4	No
WBGene00003947	pbs-1	No
WBGene00003949	pbs-3	No
WBGene00003951	pbs-5	No
WBGene00003952	pbs-6	No
WBGene00003956	pcp-1	No
WBGene00003957	pcp-2	No
WBGene00003958	pcp-3	No
WBGene00003959	pcp-4	No
WBGene00003960	pcs-1	No
WBGene00003968	peb-1	No
WBGene00003981	pes-8	No
WBGene00003995	pgp-1	Yes
WBGene00004005	pgp-11	No
WBGene00004010	pha-1	No
WBGene00004020	pho-1	No
WBGene00004023	pho-4	No
WBGene00004037	plc-2	No
WBGene00004038	plc-3	No
WBGene00004055	pmk-1	No
WBGene00004057	pmk-3	No
WBGene00004058	pmp-1	Yes
WBGene00004059	pmp-2	Yes
WBGene00004060	pmp-3	No
WBGene00004061	pmp-4	No
WBGene00004063	pmr-1	Yes
WBGene00004068	pnk-1	No
WBGene00004075	pod-1	No
WBGene00004086	pph-4.2	No
WBGene00004089	ppk-3	No
WBGene00004099	abu-15	No
WBGene00004109	stam-1	No
WBGene00004115	pqn-26	No
WBGene00004128	pqn-41	No
WBGene00004136	pqn-51	No
WBGene00004150	pqn-67	No
WBGene00004169	pqn-89	No
WBGene00004174	abu-14	No
WBGene00004183	prk-2	No
WBGene00004195	prx-6	No
WBGene00004199	prx-14	No
WBGene00004201	prx-19	No
WBGene00004207	ptb-1	No
WBGene00004211	ptd-2	No
WBGene00004212	ptl-1	No
WBGene00004213	ptp-1	No
WBGene00004220	ptr-5	No
WBGene00004225	ptr-11	No
WBGene00004235	ptr-21	No
WBGene00004236	ptr-22	No
WBGene00004237	ptr-23	No
WBGene00004249	pvf-1	No
WBGene00004254	pxf-1	No
WBGene00004277	rab-18	No
WBGene00004278	rab-19	No
WBGene00004286	rab-39	No
WBGene00004296	rad-50	No
WBGene00004322	rcq-5	No
WBGene00004335	ref-2	No
WBGene00004339	rfc-3	No
WBGene00004342	rfs-1	No
WBGene00004347	rgs-4	No
WBGene00004350	rgs-7	No
WBGene00004356	rhi-1	No
WBGene00004358	rhr-1	No
WBGene00004361	rib-2	No
WBGene00004367	ric-8	No
WBGene00004368	ric-19	No
WBGene00004369	rig-1	No
WBGene00004374	rme-2	No
WBGene00004389	rnp-6	No
WBGene00004461	rpn-5	No
WBGene00004463	rpn-7	No
WBGene00004468	rpn-12	No
WBGene00004503	rpt-3	No
WBGene00004505	rpt-5	No
WBGene00004506	rpt-6	No
WBGene00004679	rars-1	No
WBGene00004723	sap-49	No
WBGene00004729	sax-3	No
WBGene00004740	scd-2	No
WBGene00004753	sec-8	No
WBGene00004754	sec-23	Yes
WBGene00004758	sek-1	No
WBGene00004764	sel-7	No
WBGene00004787	sft-1	No
WBGene00004789	sgk-1	No
WBGene00004793	shw-3	No
WBGene00004796	sid-2	No
WBGene00004825	skr-19	No
WBGene00004826	skr-20	No
WBGene00004856	sma-2	No
WBGene00004859	sma-5	No
WBGene00004876	smf-1	No
WBGene00004885	smg-7	No
WBGene00004889	smp-1	No
WBGene00004893	sms-2	No
WBGene00004898	snb-2	No
WBGene00004900	snf-1	No
WBGene00004904	snf-5	No
WBGene00004915	snr-2	No
WBGene00004921	snt-1	No
WBGene00004930	sod-1	No
WBGene00004932	sod-3	No
WBGene00004933	sod-4	No
WBGene00004950	sox-3	No
WBGene00004953	spd-2	No
WBGene00004954	spd-3	No
WBGene00004962	spe-8	No
WBGene00004975	spe-39	No
WBGene00004979	sph-1	No
WBGene00004995	spp-10	No
WBGene00004996	spp-11	No
WBGene00005010	spr-5	Yes
WBGene00005020	sqv-2	No
WBGene00005022	sqv-4	No
WBGene00005093	srd-15	No
WBGene00005131	srd-53	No
WBGene00005149	sre-1	No
WBGene00005196	srg-39	No
WBGene00005228	srh-2	No
WBGene00005271	srh-48	No
WBGene00005644	srp-3	No
WBGene00005648	srp-7	No
WBGene00005657	srr-6	No
WBGene00005663	sars-1	No
WBGene00005712	srv-1	No
WBGene00005826	srw-79	No
WBGene00005832	srw-85	No
WBGene00005833	srw-86	No
WBGene00006039	ssp-10	No
WBGene00006040	ssp-11	No
WBGene00006049	ssp-32	No
WBGene00006051	ssq-2	No
WBGene00006053	ssq-4	No
WBGene00006056	sss-1	No
WBGene00006059	stc-1	No
WBGene00006061	stl-1	No
WBGene00006065	sto-3	Yes
WBGene00006066	sto-4	Yes
WBGene00006306	sue-1	No
WBGene00006324	sup-17	No
WBGene00006351	sur-5	No
WBGene00006365	syg-1	No
WBGene00006366	sym-1	No
WBGene00006383	taf-2	No
WBGene00006384	taf-3	No
WBGene00006452	heh-1	No
WBGene00006454	aex-4	No
WBGene00006465	fntb-1	No
WBGene00006472	tag-123	No
WBGene00006474	wdr-5.1	No
WBGene00006476	rhgf-2	No
WBGene00006478	tag-131	No
WBGene00006479	tmbi-4	No
WBGene00006490	kdin-1	No
WBGene00006491	acl-3	No
WBGene00006495	cpna-1	No
WBGene00006514	tdp-1	No
WBGene00006517	madd-3	No
WBGene00006519	tag-174	No
WBGene00006562	tdc-1	No
WBGene00006577	tlf-1	No
WBGene00006580	tlp-1	No
WBGene00006585	tni-3	No
WBGene00006590	toc-1	No
WBGene00006591	toh-1	No
WBGene00006597	tor-1	No
WBGene00006602	tps-1	No
WBGene00006604	tra-1	No
WBGene00006609	tre-3	Yes
WBGene00006613	trm-1	No
WBGene00006615	trp-2	No
WBGene00006627	tsp-1	No
WBGene00006628	tsp-2	No
WBGene00006634	tsp-8	No
WBGene00006635	tsp-9	No
WBGene00006640	tsp-14	No
WBGene00006648	ttb-1	No
WBGene00006649	tth-1	No
WBGene00006652	ttx-1	No
WBGene00006656	twk-1	No
WBGene00006663	twk-8	No
WBGene00006668	twk-13	No
WBGene00006672	twk-18	No
WBGene00006680	twk-28	No
WBGene00006683	twk-31	No
WBGene00006698	uaf-2	No
WBGene00006703	ubc-6	No
WBGene00006704	ubc-7	No
WBGene00006726	ubl-5	No
WBGene00006734	ufd-2	No
WBGene00006741	unc-1	Yes
WBGene00006757	unc-18	No
WBGene00006774	unc-38	No
WBGene00006785	unc-50	No
WBGene00006795	unc-61	No
WBGene00006797	unc-63	No
WBGene00006809	unc-77	No
WBGene00006816	unc-84	No
WBGene00006843	unc-119	No
WBGene00006875	vab-9	No
WBGene00006889	pfd-3	No
WBGene00006893	spon-1	No
WBGene00006915	vha-6	No
WBGene00006918	vha-9	No
WBGene00006926	vit-2	No
WBGene00006931	vps-26	No
WBGene00006936	glp-4	Yes
WBGene00006940	wee-1.3	No
WBGene00006942	wrk-1	No
WBGene00006943	wrm-1	No
WBGene00006970	zag-1	No
WBGene00006971	zak-1	No
WBGene00006983	zig-6	No
WBGene00006988	zyg-1	No
WBGene00006993	zyg-8	No
WBGene00007001	tufm-2	Yes
WBGene00007014	mdt-10	No
WBGene00007041	tag-180	No
WBGene00007064	2RSSE.1	No
WBGene00007071	AC3.5	No
WBGene00007072	ugt-1	Yes
WBGene00007097	B0024.4	No
WBGene00007105	B0035.1	No
WBGene00007112	B0035.13	No
WBGene00007114	mttu-1	No
WBGene00007155	B0379.1	No
WBGene00007156	B0379.2	No
WBGene00007175	B0395.3	No
WBGene00007185	nlp-36	No
WBGene00007186	B0464.6	No
WBGene00007190	rmd-3	No
WBGene00007197	B0513.5	No
WBGene00007203	best-1	No
WBGene00007209	BE10.1	No
WBGene00007215	oxa-1	No
WBGene00007220	C01B9.1	No
WBGene00007221	cpna-3	No
WBGene00007228	acs-7	No
WBGene00007243	nspb-7	No
WBGene00007247	C01G12.7	No
WBGene00007257	C01H6.8	No
WBGene00007277	asfl-1	No
WBGene00007281	C03E10.3	No
WBGene00007296	arrd-25	No
WBGene00007301	C04F12.7	No
WBGene00007307	spch-1	No
WBGene00007308	C04G2.9	No
WBGene00007317	C05A9.2	No
WBGene00007324	C05B5.8	No
WBGene00007328	pho-10	No
WBGene00007330	C05C10.3	No
WBGene00007336	C05C12.4	No
WBGene00007339	C05D12.1	No
WBGene00007348	C05G5.2	No
WBGene00007384	swt-3	No
WBGene00007386	C06H2.2	No
WBGene00007404	best-5	No
WBGene00007434	arp-6	No
WBGene00007435	C08B11.8	No
WBGene00007455	ugt-22	Yes
WBGene00007478	C09F9.1	No
WBGene00007495	C09G9.5	No
WBGene00007501	apc-17	No
WBGene00007504	C09H10.10	No
WBGene00007516	gpx-5	No
WBGene00007529	C11H1.3	No
WBGene00007533	cbl-1	No
WBGene00007547	nhr-154	No
WBGene00007549	spin-1	No
WBGene00007550	C13C4.6	No
WBGene00007554	pptr-2	No
WBGene00007555	dohh-1	No
WBGene00007556	C14A4.3	No
WBGene00007561	ccm-3	No
WBGene00007562	C14A4.12	No
WBGene00007565	clec-48	No
WBGene00007581	alkb-8	No
WBGene00007584	C14C10.1	No
WBGene00007589	erg-28	No
WBGene00007620	ocrl-1	No
WBGene00007626	rnf-121	No
WBGene00007633	C16D2.1	No
WBGene00007645	C17E4.6	No
WBGene00007647	C17E4.10	No
WBGene00007650	ugt-23	No
WBGene00007664	seb-3	No
WBGene00007668	C18B12.6	No
WBGene00007679	C18D11.1	No
WBGene00007680	maa-1	No
WBGene00007681	C18D11.3	No
WBGene00007688	C18E9.8	No
WBGene00007689	C18E9.9	No
WBGene00007692	C23H4.3	Yes
WBGene00007698	qns-1	No
WBGene00007704	mdt-21	No
WBGene00007711	lid-1	No
WBGene00007717	C25D7.5	No
WBGene00007720	C25D7.10	No
WBGene00007721	C25D7.12	No
WBGene00007724	C25F9.4	No
WBGene00007726	C25F9.6	No
WBGene00007733	smz-1	No
WBGene00007736	igdb-2	No
WBGene00007740	C26C6.6	No
WBGene00007743	C26C6.9	No
WBGene00007775	acd-3	No
WBGene00007776	dmd-4	No
WBGene00007778	C27D8.2	No
WBGene00007779	C27D8.3	No
WBGene00007786	rmd-2	No
WBGene00007794	C28D4.7	No
WBGene00007799	nrx-1	No
WBGene00007807	C29F3.7	No
WBGene00007808	best-7	No
WBGene00007885	ugt-21	Yes
WBGene00007913	cyp-36A1	No
WBGene00007914	mys-4	No
WBGene00007917	C34C6.4	Yes
WBGene00007918	sphk-1	No
WBGene00007922	pph-6	No
WBGene00007924	rsu-1	No
WBGene00007925	C34C12.6	No
WBGene00007931	C34D1.4	No
WBGene00007933	C34E7.3	No
WBGene00007942	idh-2	No
WBGene00007944	C34F6.10	No
WBGene00007946	ugt-33	Yes
WBGene00007955	C35C5.3	No
WBGene00007959	C35C5.10	No
WBGene00007964	cyp-25A2	No
WBGene00007965	C36A4.4	No
WBGene00007977	gska-3	No
WBGene00008001	C38C10.3	No
WBGene00008019	C38H2.2	No
WBGene00008033	spin-2	No
WBGene00008063	C41G7.6	No
WBGene00008101	C44H9.6	No
WBGene00008120	C46F11.5	No
WBGene00008140	xpf-1	No
WBGene00008143	C47E8.4	No
WBGene00008165	C47G2.4	No
WBGene00008166	saps-1	No
WBGene00008172	C48B4.9	No
WBGene00008194	C49C3.4	No
WBGene00008206	set-6	No
WBGene00008214	gem-1	No
WBGene00008228	C50B8.6	No
WBGene00008229	C50F4.1	No
WBGene00008239	fshr-1	No
WBGene00008255	C51E3.10	No
WBGene00008258	mans-2	No
WBGene00008273	C53B4.3	No
WBGene00008331	ttll-5	No
WBGene00008338	pafo-1	No
WBGene00008339	C55A6.10	No
WBGene00008352	fbxa-6	No
WBGene00008366	tpra-1	No
WBGene00008368	D1053.3	No
WBGene00008369	D1053.4	No
WBGene00008370	D1054.1	No
WBGene00008372	D1054.5	No
WBGene00008395	D1086.8	No
WBGene00008398	D2005.3	No
WBGene00008415	mce-1	No
WBGene00008421	D2030.12	No
WBGene00008426	D2045.9	No
WBGene00008435	glna-2	No
WBGene00008441	usp-50	No
WBGene00008442	E01B7.2	No
WBGene00008453	E02A10.3	Yes
WBGene00008456	E02H1.2	No
WBGene00008462	E02H4.4	No
WBGene00008476	E03H4.8	No
WBGene00008482	cut-4	No
WBGene00008486	ugt-44	Yes
WBGene00008509	F01G10.6	No
WBGene00008510	lipl-7	No
WBGene00008515	F02C12.1	No
WBGene00008521	F02D8.4	No
WBGene00008528	F02E9.1	No
WBGene00008538	sqrd-1	Yes
WBGene00008577	F08G2.5	No
WBGene00008578	F08G2.7	No
WBGene00008584	F08G5.6	No
WBGene00008588	F08G12.5	No
WBGene00008590	F08H9.2	No
WBGene00008598	spin-3	No
WBGene00008629	cpt-5	No
WBGene00008634	F10A3.4	No
WBGene00008642	F10B5.8	No
WBGene00008644	F10C2.3	No
WBGene00008645	F10C2.4	No
WBGene00008654	F10F2.2	No
WBGene00008659	clec-151	No
WBGene00008664	nubp-1	No
WBGene00008667	F10G8.9	No
WBGene00008669	acs-14	Yes
WBGene00008686	F11A10.5	No
WBGene00008691	mff-1	No
WBGene00008706	gba-3	No
WBGene00008726	F13A7.11	No
WBGene00008731	F13B12.3	No
WBGene00008742	F13D12.8	No
WBGene00008750	F13E9.1	No
WBGene00008754	F13E9.5	No
WBGene00008760	F13E9.11	No
WBGene00008762	ztf-2	No
WBGene00008764	dylt-1	No
WBGene00008767	F13G3.7	No
WBGene00008775	mogs-1	No
WBGene00008777	F13H10.6	No
WBGene00008781	rpoa-2	No
WBGene00008811	F14F7.4	No
WBGene00008820	F14F11.2	No
WBGene00008829	cyp-35D1	Yes
WBGene00008832	obr-2	No
WBGene00008857	timm-23	No
WBGene00008887	tbcd-1	No
WBGene00008919	vps-36	No
WBGene00008922	F17C11.11	No
WBGene00008923	F17C11.12	No
WBGene00008926	F17H10.2	No
WBGene00008939	F18H3.1	No
WBGene00008940	F18H3.4	No
WBGene00008948	F19B6.1	No
WBGene00008957	glb-13	No
WBGene00008978	cutl-3	No
WBGene00008979	F20D1.9	No
WBGene00008993	F21A3.3	No
WBGene00009009	F21D5.4	No
WBGene00009011	F21D5.6	No
WBGene00009030	clec-233	No
WBGene00009031	F21H7.5	No
WBGene00009049	F22B8.7	Yes
WBGene00009058	F22E12.1	No
WBGene00009059	chw-1	No
WBGene00009070	F23A7.5	No
WBGene00009084	F23B12.7	No
WBGene00009121	F25H2.7	No
WBGene00009137	bath-39	No
WBGene00009165	gpx-1	No
WBGene00009173	prom-1	No
WBGene00009187	F27D4.1	No
WBGene00009207	F28C6.8	No
WBGene00009239	irld-6	No
WBGene00009246	gfm-1	No
WBGene00009257	F29G6.1	No
WBGene00009267	usp-48	No
WBGene00009276	F30F8.9	No
WBGene00009277	F30F8.10	No
WBGene00009284	F31C3.2	No
WBGene00009293	F31D4.8	No
WBGene00009307	F32A11.1	No
WBGene00009314	F32B4.4	No
WBGene00009320	F32B6.3	No
WBGene00009333	F32D8.10	No
WBGene00009334	F32D8.12	No
WBGene00009336	F32D8.14	No
WBGene00009344	F32H2.7	No
WBGene00009369	F33H2.6	No
WBGene00009387	glb-15	No
WBGene00009402	F35C11.3	No
WBGene00009429	F35E12.5	No
WBGene00009430	F35E12.6	No
WBGene00009433	F35E12.9	No
WBGene00009434	F35E12.10	No
WBGene00009437	F35G2.3	No
WBGene00009448	zfp-2	No
WBGene00009452	F36A2.2	No
WBGene00009461	madf-2	No
WBGene00009478	syx-7	No
WBGene00009482	F36G3.1	No
WBGene00009483	F36G3.2	No
WBGene00009495	hrg-6	No
WBGene00009500	F36H2.3	No
WBGene00009530	F38B2.3	No
WBGene00009560	psa-3	No
WBGene00009563	F39H2.3	No
WBGene00009579	arrd-6	No
WBGene00009623	F41E7.7	No
WBGene00009632	ttyh-1	No
WBGene00009645	F42G10.1	No
WBGene00009654	sly-1	No
WBGene00009666	slc-25A42	No
WBGene00009673	F43G9.13	No
WBGene00009680	msd-1	No
WBGene00009681	gipc-2	No
WBGene00009685	F44D12.8	No
WBGene00009706	argk-1	Yes
WBGene00009726	tbc-13	No
WBGene00009727	lips-1	No
WBGene00009773	lipl-2	No
WBGene00009787	F46F2.3	No
WBGene00009798	F46G10.4	No
WBGene00009803	F47B8.2	No
WBGene00009811	F47B8.10	No
WBGene00009812	suca-1	No
WBGene00009826	F47G4.5	No
WBGene00009839	fbxa-188	No
WBGene00009842	igeg-2	No
WBGene00009850	F48F7.5	No
WBGene00009851	F48F7.6	No
WBGene00009877	F49C12.7	No
WBGene00009878	F49C12.9	No
WBGene00009880	F49C12.11	No
WBGene00009882	vha-17	No
WBGene00009886	F49E2.2	No
WBGene00009887	glb-17	No
WBGene00009915	F52A8.1	No
WBGene00009916	F52A8.3	No
WBGene00009918	F52A8.5	No
WBGene00009953	F53A2.9	No
WBGene00009966	F53B7.3	No
WBGene00009969	F53B7.7	No
WBGene00009971	F53C11.1	No
WBGene00009977	swan-1	No
WBGene00009992	F53F4.10	No
WBGene00010006	F53H2.3	No
WBGene00010014	F54B3.2	No
WBGene00010015	atad-3	No
WBGene00010050	F54D5.4	No
WBGene00010056	smc-6	No
WBGene00010059	F54E4.3	No
WBGene00010070	nep-17	No
WBGene00010083	F55B11.1	No
WBGene00010096	rskd-1	No
WBGene00010109	F55C10.5	No
WBGene00010135	F55H12.4	No
WBGene00010139	F56A8.3	No
WBGene00010172	oac-36	No
WBGene00010175	F56H11.2	No
WBGene00010232	F58B3.6	No
WBGene00010251	sta-2	No
WBGene00010254	F58E6.5	Yes
WBGene00010262	droe-4	No
WBGene00010290	F58H1.7	No
WBGene00010307	skat-1	No
WBGene00010309	rpn-6.2	No
WBGene00010311	F59B2.9	No
WBGene00010315	F59B2.13	No
WBGene00010337	F59F4.2	No
WBGene00010338	F59F4.3	No
WBGene00010340	slcf-1	No
WBGene00010348	H01G02.1	No
WBGene00010351	cbd-1	No
WBGene00010357	H03A11.2	No
WBGene00010377	nspa-1	No
WBGene00010401	H16D19.3	No
WBGene00010408	mboa-2	Yes
WBGene00010435	JC8.2	No
WBGene00010440	ttr-51	No
WBGene00010451	K01A11.3	No
WBGene00010456	K01C8.1	No
WBGene00010470	cdr-4	No
WBGene00010471	cdr-6	No
WBGene00010486	K01H12.4	No
WBGene00010496	sec-12	No
WBGene00010503	K02C4.5	No
WBGene00010522	K03A11.5	No
WBGene00010542	K03H1.7	No
WBGene00010547	K03H1.12	No
WBGene00010552	K04C1.2	No
WBGene00010558	ptp-4	No
WBGene00010563	K04G2.4	No
WBGene00010564	ath-1	No
WBGene00010566	K04G2.7	No
WBGene00010567	K04G2.9	No
WBGene00010579	K05C4.2	No
WBGene00010609	dut-1	No
WBGene00010621	egg-6	No
WBGene00010625	K07C5.2	No
WBGene00010628	ceeh-2	No
WBGene00010637	K07F5.12	No
WBGene00010645	fecl-1	No
WBGene00010651	K08C9.2	No
WBGene00010652	K08C9.5	No
WBGene00010658	K08D8.4	No
WBGene00010660	K08D8.6	No
WBGene00010666	K08E4.2	No
WBGene00010670	K08E4.6	No
WBGene00010676	K08F4.1	No
WBGene00010686	K08F9.3	No
WBGene00010694	bgnt-1.5	No
WBGene00010699	trpp-6	No
WBGene00010724	K09E9.1	No
WBGene00010727	K09G1.1	No
WBGene00010728	K09G1.2	No
WBGene00010752	K10G4.3	No
WBGene00010759	cysl-2	No
WBGene00010770	K11D2.4	No
WBGene00010776	pix-1	No
WBGene00010784	twk-48	No
WBGene00010795	M01A8.1	No
WBGene00010809	M01F1.3	No
WBGene00010810	M01F1.4	No
WBGene00010823	M01G12.10	No
WBGene00010828	M02B1.3	No
WBGene00010829	M02B1.4	No
WBGene00010842	ymel-1	No
WBGene00010846	M04B2.2	No
WBGene00010847	M04B2.4	No
WBGene00010849	M04B2.7	No
WBGene00010851	M04C3.2	No
WBGene00010867	tag-260	No
WBGene00010870	let-522	No
WBGene00010878	M05D6.5	No
WBGene00010887	M7.12	No
WBGene00010888	dlc-2	No
WBGene00010899	M28.8	No
WBGene00010900	M28.9	No
WBGene00010909	cisd-3.1	No
WBGene00010910	M106.2	No
WBGene00010935	M163.1	No
WBGene00010970	glb-20	No
WBGene00010976	R02D5.1	No
WBGene00010993	vha-20	No
WBGene00010998	R03G8.3	No
WBGene00011002	nhr-205	No
WBGene00011017	R04F11.5	No
WBGene00011029	abhd-11.2	No
WBGene00011037	R05D11.9	No
WBGene00011045	gpx-2	No
WBGene00011050	agl-1	No
WBGene00011055	arrd-14	No
WBGene00011083	glo-1	No
WBGene00011093	R07B7.9	Yes
WBGene00011104	cut-5	No
WBGene00011111	snfc-5	No
WBGene00011140	R08B4.4	No
WBGene00011143	R08D7.2	No
WBGene00011154	R09A8.5	No
WBGene00011173	acs-18	Yes
WBGene00011176	R09E10.6	No
WBGene00011181	R09H10.3	No
WBGene00011182	R09H10.5	No
WBGene00011212	R10E8.6	No
WBGene00011216	usp-46	No
WBGene00011217	R10E11.5	No
WBGene00011221	R10E12.2	No
WBGene00011230	nud-2	No
WBGene00011237	gkow-1	No
WBGene00011251	glb-22	No
WBGene00011261	nphp-4	No
WBGene00011265	R13H4.7	No
WBGene00011271	flad-1	No
WBGene00011297	R102.10	No
WBGene00011307	mpst-7	No
WBGene00011311	T01B7.5	No
WBGene00011312	trcs-2	No
WBGene00011323	mut-15	No
WBGene00011330	T01D3.6	No
WBGene00011331	T01E8.1	No
WBGene00011336	ubxn-5	No
WBGene00011337	T01G1.2	No
WBGene00011338	sec-31	Yes
WBGene00011355	lgc-14	No
WBGene00011361	lyst-1	No
WBGene00011368	tftc-5	No
WBGene00011374	T02D1.8	No
WBGene00011381	npr-25	No
WBGene00011385	T02G6.2	No
WBGene00011397	T03E6.8	No
WBGene00011407	ppat-1	No
WBGene00011414	T04A8.13	No
WBGene00011439	T04F3.4	No
WBGene00011445	T04F8.7	No
WBGene00011449	T04H1.2	No
WBGene00011474	aldo-1	No
WBGene00011476	T05D4.3	No
WBGene00011487	T05E12.6	No
WBGene00011488	nra-2	No
WBGene00011495	T05F1.11	No
WBGene00011498	T05G5.1	No
WBGene00011500	T05G5.5	No
WBGene00011511	gpcp-2	No
WBGene00011517	cgt-1	No
WBGene00011527	cchl-1	No
WBGene00011530	T06D8.10	No
WBGene00011538	T06E6.1	No
WBGene00011543	acl-2	No
WBGene00011571	ttr-46	No
WBGene00011578	npr-20	No
WBGene00011579	T07D4.2	No
WBGene00011580	ddx-19	No
WBGene00011631	T08G11.4	No
WBGene00011661	ztf-27	No
WBGene00011670	fbxa-84	No
WBGene00011676	cyp-13A2	No
WBGene00011679	ucr-2.2	Yes
WBGene00011684	T10B10.8	No
WBGene00011694	T10G3.3	No
WBGene00011705	T11A5.6	No
WBGene00011719	T11G6.4	No
WBGene00011730	drr-2	No
WBGene00011732	arrd-17	No
WBGene00011733	T12D8.5	No
WBGene00011736	T12D8.9	No
WBGene00011749	ssp-36	No
WBGene00011798	T16G1.4	No
WBGene00011803	T16G12.1	No
WBGene00011806	ekl-6	No
WBGene00011820	T18D3.1	No
WBGene00011821	cdf-2	No
WBGene00011832	bgal-1	No
WBGene00011864	T20F10.2	No
WBGene00011883	mrpl-50	No
WBGene00011891	del-6	No
WBGene00011893	T21C9.6	No
WBGene00011897	scpl-4	No
WBGene00011914	T22C1.3	No
WBGene00011917	T22C1.6	No
WBGene00011932	sptl-3	No
WBGene00011936	pgrn-1	No
WBGene00011938	alh-13	Yes
WBGene00011939	prmt-3	No
WBGene00011940	T23B5.3	No
WBGene00011955	cdka-1	No
WBGene00011956	T23F11.4	No
WBGene00011967	pir-1	No
WBGene00011972	T23G11.7	No
WBGene00011990	T24D5.2	No
WBGene00011994	samp-1	No
WBGene00012000	T24H10.1	No
WBGene00012004	dyrb-1	No
WBGene00012014	T25B9.8	No
WBGene00012035	T26C5.5	No
WBGene00012037	T26E3.4	No
WBGene00012085	T27D12.1	No
WBGene00012101	zip-10	No
WBGene00012105	T27F6.6	No
WBGene00012118	grsp-2	No
WBGene00012122	T28C6.8	No
WBGene00012125	T28D6.5	No
WBGene00012127	T28D6.7	No
WBGene00012128	nra-1	No
WBGene00012134	T28F3.8	No
WBGene00012144	T28H10.3	No
WBGene00012158	ucr-2.1	No
WBGene00012162	sek-6	No
WBGene00012172	W01B6.5	No
WBGene00012193	vps-25	No
WBGene00012197	W02B8.1	No
WBGene00012199	mltn-3	No
WBGene00012216	W02D9.10	No
WBGene00012235	W04A4.6	No
WBGene00012253	clec-50	No
WBGene00012261	lpr-3	No
WBGene00012282	W05E10.5	No
WBGene00012291	W06A7.2	No
WBGene00012294	nspa-8	No
WBGene00012306	W06F12.2	No
WBGene00012316	ctps-1	No
WBGene00012342	mtr-4	No
WBGene00012359	W09D10.1	No
WBGene00012363	W09D10.5	No
WBGene00012381	Y2H9A.4	No
WBGene00012382	ttr-16	No
WBGene00012389	Y6B3B.4	No
WBGene00012396	Y6D1A.2	No
WBGene00012399	Y6E2A.5	No
WBGene00012418	Y7A9C.1	No
WBGene00012440	Y12A6A.2	No
WBGene00012443	Y15E3A.4	No
WBGene00012444	Y15E3A.5	No
WBGene00012452	Y17D7B.4	No
WBGene00012462	Y17G7B.8	No
WBGene00012463	Y17G7B.10	No
WBGene00012475	Y18D10A.2	No
WBGene00012478	mxt-1	No
WBGene00012489	Y19D2B.1	Yes
WBGene00012494	nhr-232	No
WBGene00012525	Y32B12C.1	No
WBGene00012529	Y32F6A.4	No
WBGene00012532	crp-1	No
WBGene00012533	fbxa-209	No
WBGene00012544	Y37D8A.2	No
WBGene00012547	Y37D8A.5	No
WBGene00012554	Y37D8A.16	No
WBGene00012558	Y37D8A.21	No
WBGene00012573	Y37H2C.1	No
WBGene00012605	Y38F1A.1	No
WBGene00012606	Y38F1A.2	No
WBGene00012608	Y38F1A.6	No
WBGene00012647	swt-4	No
WBGene00012652	Y39A1A.14	No
WBGene00012654	Y39A1A.16	No
WBGene00012657	Y39A1A.20	No
WBGene00012664	Y39B6A.1	No
WBGene00012665	pph-5	No
WBGene00012669	Y39B6A.7	No
WBGene00012676	pro-3	No
WBGene00012695	Y39B6A.37	No
WBGene00012696	reps-1	No
WBGene00012701	Y39B6A.43	No
WBGene00012712	ttm-1	No
WBGene00012713	Y39E4A.3	No
WBGene00012720	Y39E4B.11	No
WBGene00012721	Y39E4B.13	No
WBGene00012759	sup-1	No
WBGene00012762	Y41E3.1	No
WBGene00012765	Y41E3.7	No
WBGene00012791	Y43D4A.5	No
WBGene00012823	Y43F8B.13	No
WBGene00012835	ani-3	No
WBGene00012866	afmd-2	No
WBGene00012869	Y45F10A.7	No
WBGene00012896	snrp-200	No
WBGene00012901	cnp-2	No
WBGene00012911	acl-7	No
WBGene00012912	Y46G5A.22	No
WBGene00012920	Y46G5A.35	No
WBGene00012928	aakb-2	No
WBGene00012939	Y47D3B.1	No
WBGene00012941	Y47D3B.4	No
WBGene00012948	dhhc-2	No
WBGene00012951	Y47H9C.8	No
WBGene00012967	kvs-4	No
WBGene00012977	Y48A6C.4	No
WBGene00012982	jmjd-2	No
WBGene00012999	rpoa-1	No
WBGene00013006	lin-38	No
WBGene00013011	snx-14	No
WBGene00013021	Y48G10A.4	No
WBGene00013037	Y49E10.18	No
WBGene00013039	scav-3	Yes
WBGene00013040	Y49E10.21	No
WBGene00013075	Y51A2D.7	No
WBGene00013094	Y51H1A.3	No
WBGene00013103	Y51H4A.7	No
WBGene00013104	Y51H4A.8	No
WBGene00013111	sta-1	No
WBGene00013119	Y51H4A.25	No
WBGene00013135	rga-2	No
WBGene00013168	arp-1	No
WBGene00013177	rsy-1	No
WBGene00013178	Y53H1A.2	No
WBGene00013210	Y54G9A.7	No
WBGene00013211	Y54G9A.9	No
WBGene00013212	Y54G11A.1	No
WBGene00013218	Y54G11A.9	No
WBGene00013219	Y54G11A.11	No
WBGene00013220	ctl-3	Yes
WBGene00013222	dmsr-6	No
WBGene00013224	Y55D9A.2	No
WBGene00013227	Y56A3A.6	No
WBGene00013231	tsen-2	No
WBGene00013244	Y56A3A.33	No
WBGene00013257	Y57A10A.14	No
WBGene00013266	Y57A10A.26	No
WBGene00013317	Y57G11C.22	No
WBGene00013347	Y59A8B.10	No
WBGene00013350	slr-2	No
WBGene00013365	Y60A3A.19	No
WBGene00013378	emc-3	No
WBGene00013406	Y63D3A.7	No
WBGene00013407	Y63D3A.8	No
WBGene00013415	Y64G10A.6	No
WBGene00013416	Y64G10A.7	No
WBGene00013462	micu-1	No
WBGene00013489	col-42	No
WBGene00013529	Y73F8A.24	No
WBGene00013530	ntl-11	No
WBGene00013540	Y75B8A.3	No
WBGene00013541	Y75B8A.4	No
WBGene00013549	Y75B8A.13	No
WBGene00013559	Y75B8A.28	No
WBGene00013561	Y75B8A.31	No
WBGene00013568	Y75B12B.3	No
WBGene00013578	scav-2	Yes
WBGene00013579	Y79H2A.2	No
WBGene00013590	Y81G3A.1	No
WBGene00013623	fbxa-90	No
WBGene00013669	Y105E8A.8	No
WBGene00013688	riok-2	No
WBGene00013690	hprt-1	No
WBGene00013696	Y106G6A.4	No
WBGene00013700	Y106G6D.3	No
WBGene00013703	Y106G6D.7	No
WBGene00013716	Y106G6H.1	No
WBGene00013736	Y111B2A.13	No
WBGene00013763	Y113G7B.14	No
WBGene00013789	Y116A8C.9	No
WBGene00013822	Y116F11B.6	No
WBGene00013833	ZC15.5	No
WBGene00013847	cls-3	No
WBGene00013872	ZC374.2	No
WBGene00013874	ZC376.2	Yes
WBGene00013887	nspa-5	No
WBGene00013888	nspa-3	No
WBGene00013895	ZC434.9	No
WBGene00013901	ugt-16	No
WBGene00013906	ugt-5	Yes
WBGene00013914	lgc-37	No
WBGene00013920	pssy-1	No
WBGene00013923	ghi-1	No
WBGene00013924	rad-23	No
WBGene00013963	sulp-8	No
WBGene00013983	ZK512.2	No
WBGene00013994	ZK524.4	No
WBGene00014004	fic-1	No
WBGene00014025	asna-1	No
WBGene00014028	trxr-2	No
WBGene00014039	ZK662.2	No
WBGene00014058	ZK673.2	No
WBGene00014077	ZK792.4	No
WBGene00014079	ZK792.7	No
WBGene00014088	ZK809.8	No
WBGene00014096	ZK829.7	Yes
WBGene00014109	chpf-1	Yes
WBGene00014124	usip-1	No
WBGene00014127	ZK892.3	No
WBGene00014138	clec-186	No
WBGene00014141	ZK899.2	No
WBGene00014152	ZK930.2	No
WBGene00014164	lact-2	No
WBGene00014168	ZK945.6	No
WBGene00014173	ZK970.7	No
WBGene00014181	ZK1010.8	No
WBGene00014202	mmcm-1	No
WBGene00014204	ccdc-47	Yes
WBGene00014223	ZK1098.6	No
WBGene00014224	mrps-23	No
WBGene00014240	htas-1	No
WBGene00014253	ZK1320.3	No
WBGene00014258	ZK1320.9	No
WBGene00014262	ZK1321.4	No
WBGene00014300	D2023.1	No
[truncated: 970 more rows]
